# Supplementary material for: The Pseudomonas aeruginosa accessory genome elements influence virulence towards Caenorhabditis elegans
Source: Genome Biol. 2019 Dec 10;20:270. doi: 10.1186/s13059-019-1890-1 (PMC6902481; doi:10.1186/s13059-019-1890-1)
Supplement: Supplementary file 5 — Additional file 5: Table S4. Nomenclature for the experimentally studied bacterial genes. A set of genes associated with virulence are termed for the P. aeruginosa strains z8 and PAO1. Genes that constitute a gene block frequently found in multiple tandem copies in various strains are termed teg(G to N), for 'tandem element gene'. The region encompassing from tegG to tegN is referred to as 'teg gene block’. The Refseq gene ‘NT41_RS12090’ is termed ghlO (glycosyl hydrolase like ORF) as it exhibits similarity to domain Cdd:cd06549 (E-value: 0.02, CDD database) . The PAO1 genes: PA2228, vqsM, qsrO, and PA225, constitute a putative operon [33] that is referred to as ‘qsr’ operon. [file 13059_2019_1890_MOESM5_ESM.xlsx]

## Sheet: Table S4 Experimentally studied genes
Cluster index	The index of the gene in the CD-HIT cluster
strain	Strain in which the gene is present
gene	Name given to the gene
refseqID	Gene ID in the RefSeq database
patricID	Gene ID in the Patric database
refseq_annotation	Gene annotation in the Refseq database
associated	Indicates whether the gene is significantly associated with virulence (y) or not (n)
reference	Reference work that describes gene in the literature
Cluster index	strain	gene	refseqID	patricID	refseq_annotation	associated	reference
21557	z8	tegG	NT41_RS30480	fig|287.893.peg.6157	hypothetical prot	n	this study
5222	z8	tegH	NT41_RS30475	fig|287.893.peg.6156	transcriptional regulator	y	this study
5222	z8	tegI	NT41_RS30475	fig|287.893.peg.6155	replication initiation protein	y	this study
21386	z8	tegJ	NT41_RS30465	fig|287.893.peg.6154	hypothetical prot	y	this study
26140	z8	tegK	NT41_RS30455	fig|287.893.peg.6153	hypothetical prot	y	this study
15466	z8	tegL	NT41_RS30445	fig|287.893.peg.6152	hypothetical prot	y	this study
10513	z8	tegM	NT41_RS30440	fig|287.893.peg.6151	hypothetical prot	y	this study
5330	z8	tegN	NT41_RS30435	fig|287.893.peg.6150	zonular occludens toxin	y	this study
25296	z8	ghlO	NT41_RS12090	fig|287.893.peg.2454	hypothetical prot	y	this study
17701	z8	qsrO	NT41_RS30530	NA	hypothetical prot	y	Kohler et al. 2014
4755	PAO1	PA2228	NP_250918.1	NA	hypothetical prot	n	Kohler et al. 2014
8918	PAO1	vqsM	NP_250917.1	fig|208964.12.peg.2327	HTH-type trans. regulator	n	Kohler et al. 2014, Dong YH et al. 2005
17701	PAO1	qsrO	NP_250916.1	NA	hypothetical prot	y	Kohler et al. 2014
19821	PAO1	PA2225	NP_250915.1	fig|208964.12.peg.2326	hypothetical prot	y	Kohler et al. 2014
