# Supplementary material for: The Pseudomonas aeruginosa accessory genome elements influence virulence towards Caenorhabditis elegans
Source: Genome Biol. 2019 Dec 10;20:270. doi: 10.1186/s13059-019-1890-1 (PMC6902481; doi:10.1186/s13059-019-1890-1)
Supplement: Supplementary file 7 — Additional file 7: Table S6. Gene targeted by CRISPR spacers. [file 13059_2019_1890_MOESM7_ESM.xlsx]

## Sheet: Table S6 Spacer targeted genes
Result	Running index of the result
Cluster index	The index of the original CD-HIT cluster
function	Gene function
PA14 gene	PA14 gene, if present in the cluster
PAO1 gene	PAO1 gene, if present in the cluster
Other	Present the first member in the cluster (based on CD-HIT order). Shown is the locus_tag, and old_locus_tag if available
know virulence gene	indicates whether the gene is known as virulence gene
crisprTarget	indicates whether the gene was identified as CRISPR target
numOfOrthologues	Number of orthologues genes present in the clusters (among the 52 strains)
numOfStrains	Number of strains represented in the cluster
MW1	Mann-Whitney p-value for association of gene presence with lower survival
MW2	Mann-Whitney p-value for association of gene presence with higher survival
LR	P-value based on linear regression
Slope	Slope of linear regression
log MW	log10 of the MW1 (for HVA), MW2 (for LVA), Minus indicates association with low virulence
log LR	log10 of the LR, minus indicates association with low virulence
mean SW	Average survival of the strains that have the gene
mean SWO	Average survival of the strains that do not have the gene
P-val logMW	P-value of the logMW score based on permutation test
P-val logLR	P-value of the logLR score based on permutation test
Next 52 columns correspond to presence/absence matrix of the genes in the 52 strains ordered from low survival to high
Result	index	function	PA14	PAO1	Other	know virulence gene	crisprTarget	numOfOrthologues	numOfStrains	MW1	MW2	LR	Slope	log MW	log LR	mean SW	mean SWO	P-val logMW	pval logLR	X5	X40	X51	X28	X2	X17	X48	X16	X4	X43	X41	X45	X31	X12	X1	X13	X20	X37	X8	X32	X29	X38	X9	X3	X6	X25	X30	X44	X14	X36
1	18193	hypothetical protein	-	-	Q009_RS0107395;-	false	true	9	9	0.00859651	0.991952	0.0239717	-1.94713	2.06568	1.6203	3.65722	5.60435	0.0078	0.01	0	0	1	0	0	0	1	1	0	1	0	0	0	0	0	0	1	0	0	0	0	1	1	1	0	1	0	0	0	0
2	12599	hypothetical protein	-	-	Q000_RS26960;Q000_04127	false	true	5	5	0.0161051	0.985104	0.0321686	-2.37711	1.79304	1.49257	3.1188	5.49591	0.0127	0.0089	0	1	0	0	0	0	0	0	0	0	1	0	1	0	0	1	0	0	0	0	1	0	0	0	0	0	0	0	0	0
3	13938	hypothetical protein	PA14_RS24050;PA14_58950	-	PA14_RS24050;PA14_58950	false	true	21	21	0.0240284	0.977007	0.0546204	-1.287	1.61928	1.26265	4.5001	5.7871	0.0217	0.0248	0	1	1	1	0	0	0	0	1	1	1	1	1	0	0	1	0	1	0	1	1	0	0	0	0	0	1	1	1	1
4	22989	holin	-	-	NT05_RS02535;-	false	true	6	6	0.0313193	0.970647	0.076415	-1.82736	1.50419	1.11682	3.65083	5.4782	0.0313	0.0332	0	0	1	0	0	0	1	0	0	1	0	0	1	0	0	0	0	0	0	0	0	0	0	1	0	0	0	0	0	0
5	8235	integrase	-	-	NT56_RS24605;-	false	true	4	4	0.04144	0.961516	0.0984165	-2.0476	1.38258	1.00693	3.37725	5.42485	0.0397	0.0406	0	0	0	0	0	0	1	1	0	0	0	0	0	0	0	0	1	0	0	0	0	0	1	0	0	0	0	0	0	0
6	18123	hypothetical protein	-	-	NT56_RS09025;-	false	true	3	3	0.0420968	0.961311	0.0950259	-2.36336	1.37575	1.02216	3.04033	5.40369	0.0396	0.0383	0	0	0	0	0	0	0	1	0	0	0	0	1	1	0	0	0	0	0	0	0	0	0	0	0	0	0	0	0	0
7	15693	hypothetical protein	-	-	Q009_RS0107125;-	false	true	4	4	0.0445774	0.95856	0.101896	-2.02729	1.35089	0.991844	3.396	5.42329	0.0405	0.0416	0	0	0	0	0	0	0	1	0	0	0	1	0	1	0	0	0	0	0	0	0	1	0	0	0	0	0	0	0	0
8	2518	terminase	-	-	NT05_RS02510;-	false	true	3	3	0.0476593	0.956111	0.134875	-2.12246	1.32185	0.870068	3.26733	5.3898	0.049	0.06	0	0	1	0	0	0	0	0	0	1	0	0	0	0	0	0	0	0	0	0	0	0	0	1	0	0	0	0	0	0
9	4339	phage portal protein	-	-	NT05_RS02505;-	false	true	3	3	0.0476593	0.956111	0.134875	-2.12246	1.32185	0.870068	3.26733	5.3898	0.049	0.06	0	0	1	0	0	0	0	0	0	1	0	0	0	0	0	0	0	0	0	0	0	0	0	1	0	0	0	0	0	0
10	19996	phage terminase small subunit	-	-	NT05_RS02515;-	false	true	3	3	0.0476593	0.956111	0.134875	-2.12246	1.32185	0.870068	3.26733	5.3898	0.049	0.06	0	0	1	0	0	0	0	0	0	1	0	0	0	0	0	0	0	0	0	0	0	0	0	1	0	0	0	0	0	0
11	1793	membrane protein	PA14_RS13485;PA14_33070	PA2439;-	PA14_RS13485;PA14_33070	false	true	49	49	0.0496392	0.954257	0.0630541	-2.62263	1.30418	1.20029	5.11604	7.73867	0.047	0.0405	1	1	1	1	1	1	1	1	1	1	1	1	1	1	1	1	1	1	1	1	1	1	1	1	1	1	1	0	1	1
12	28452	hypothetical protein	-	-	Q002_RS36015;Q002_05977	false	true	1	1	0.0548941	0.952121	0.130169	-3.64647	1.26047	0.885492	1.691	5.33747	0.0183	0.0247	0	1	0	0	0	0	0	0	0	0	0	0	0	0	0	0	0	0	0	0	0	0	0	0	0	0	0	0	0	0
13	7350	hypothetical protein	-	-	L683_RS66230;L683_24400	false	true	1	1	0.0626977	0.945106	0.203929	-3.07141	1.20275	0.690521	2.255	5.32641	0.0322	0.0355	0	0	1	0	0	0	0	0	0	0	0	0	0	0	0	0	0	0	0	0	0	0	0	0	0	0	0	0	0	0
14	11943	transcriptional regulator	-	-	L683_RS0134285;-	false	true	1	1	0.0626977	0.945106	0.203929	-3.07141	1.20275	0.690521	2.255	5.32641	0.0322	0.0355	0	0	1	0	0	0	0	0	0	0	0	0	0	0	0	0	0	0	0	0	0	0	0	0	0	0	0	0	0	0
15	13431	hypothetical protein	-	-	L683_RS61455;L683_24410	false	true	1	1	0.0626977	0.945106	0.203929	-3.07141	1.20275	0.690521	2.255	5.32641	0.0322	0.0355	0	0	1	0	0	0	0	0	0	0	0	0	0	0	0	0	0	0	0	0	0	0	0	0	0	0	0	0	0	0
16	16844	hypothetical protein	-	-	L683_RS61440;L683_24395	false	true	1	1	0.0626977	0.945106	0.203929	-3.07141	1.20275	0.690521	2.255	5.32641	0.0322	0.0355	0	0	1	0	0	0	0	0	0	0	0	0	0	0	0	0	0	0	0	0	0	0	0	0	0	0	0	0	0	0
17	17359	hypothetical protein	-	-	L683_RS41765;L683_07470	false	true	1	1	0.0626977	0.945106	0.203929	-3.07141	1.20275	0.690521	2.255	5.32641	0.0322	0.0355	0	0	1	0	0	0	0	0	0	0	0	0	0	0	0	0	0	0	0	0	0	0	0	0	0	0	0	0	0	0
18	9322	hypothetical protein	-	-	NT56_RS24595;-	false	true	5	5	0.0681198	0.935868	0.142203	-1.64845	1.16673	0.847091	3.7774	5.42585	0.0642	0.0646	0	0	0	0	0	0	1	1	0	0	0	0	0	0	0	0	1	0	0	0	0	0	1	0	0	0	0	0	1	0
19	11392	hypothetical protein	-	-	Q012_RS13520;Q012_01251	false	true	9	9	0.0716795	0.93157	0.132158	-1.31708	1.1446	0.878905	4.17822	5.4953	0.069	0.0634	0	0	1	0	0	0	0	0	0	1	0	0	1	0	0	0	0	1	0	1	0	0	0	0	0	0	1	1	1	1
20	9124	hypothetical protein	-	-	PABE177_RS16135;PABE177_2972	false	true	4	3	0.0759997	0.929456	0.151266	-2.03898	1.11919	0.820257	3.346	5.38498	0.0772	0.0676	0	0	0	0	0	0	0	0	0	2	0	0	1	0	0	0	0	0	0	1	0	0	0	0	0	0	0	0	0	0
21	18228	hypothetical protein	-	-	PA103_RS04915;PA103_0950	false	true	6	5	0.076666	0.927704	0.142751	-1.64624	1.1154	0.845421	3.7794	5.42564	0.0758	0.0656	2	0	0	0	0	0	0	0	0	0	0	0	1	0	0	0	0	0	0	1	0	0	0	1	0	0	0	1	0	0
22	1243	DEAD/DEAH box helicase	PA14_RS24285;PA14_59540	-	PA14_RS24285;PA14_59540	false	true	25	21	0.0768331	0.92582	0.119505	-1.04921	1.11445	0.922615	4.64186	5.69106	0.0735	0.059	0	1	1	1	0	0	0	0	1	0	1	1	0	0	0	0	0	2	1	1	2	1	0	1	0	0	1	2	0	0
23	5455	hypothetical protein	-	-	PABE177_RS12735;PABE177_2379	false	true	2	2	0.0801994	0.926654	0.20959	-2.16668	1.09583	0.678629	3.184	5.35068	0.0842	0.107	0	0	1	0	0	0	0	0	0	0	0	0	0	0	0	0	0	0	0	1	0	0	0	0	0	0	0	0	0	0
24	2629	terminase	-	-	Q009_RS22225;Q009_02931	false	true	7	7	0.0857592	0.918364	0.152023	-1.39037	1.06672	0.81809	4.06414	5.45451	0.0859	0.0729	0	0	0	0	0	0	0	1	0	0	0	1	1	1	0	0	0	0	0	0	0	1	0	0	0	0	0	0	0	0
25	5135	phage portal protein	-	-	Q009_RS0107130;-	false	true	7	7	0.0857592	0.918364	0.152023	-1.39037	1.06672	0.81809	4.06414	5.45451	0.0859	0.0729	0	0	0	0	0	0	0	1	0	0	0	1	1	1	0	0	0	0	0	0	0	1	0	0	0	0	0	0	0	0
26	11351	hypothetical protein	-	-	Q009_RS22195;Q009_02922	false	true	7	7	0.0857592	0.918364	0.152023	-1.39037	1.06672	0.81809	4.06414	5.45451	0.0859	0.0729	0	0	0	0	0	0	0	1	0	0	0	1	1	1	0	0	0	0	0	0	0	1	0	0	0	0	0	0	0	0
27	15346	hypothetical protein	-	-	Q009_RS22190;Q009_02921	false	true	7	7	0.0857592	0.918364	0.152023	-1.39037	1.06672	0.81809	4.06414	5.45451	0.0859	0.0729	0	0	0	0	0	0	0	1	0	0	0	1	1	1	0	0	0	0	0	0	0	1	0	0	0	0	0	0	0	0
28	17452	hypothetical protein	-	-	Q009_RS22305;Q009_02950	false	true	7	7	0.0857592	0.918364	0.152023	-1.39037	1.06672	0.81809	4.06414	5.45451	0.0859	0.0729	0	0	0	0	0	0	0	1	0	0	0	1	1	1	0	0	0	0	0	0	0	1	0	0	0	0	0	0	0	0
29	21546	phage head-tail adapter protein	-	-	Q009_RS0107120;-	false	true	7	7	0.0857592	0.918364	0.152023	-1.39037	1.06672	0.81809	4.06414	5.45451	0.0859	0.0729	0	0	0	0	0	0	0	1	0	0	0	1	1	1	0	0	0	0	0	0	0	1	0	0	0	0	0	0	0	0
30	20793	hypothetical protein	-	-	NT05_RS29260;-	false	true	3	3	0.0910383	0.915222	0.209939	-1.7857	1.04078	0.677907	3.58467	5.37037	0.0856	0.0998	0	0	0	0	1	0	0	0	0	0	0	0	0	0	0	1	0	0	0	0	0	0	0	1	0	0	0	0	0	0
31	11442	hypothetical protein	-	-	NT54_RS06905;-	false	true	1	1	0.091328	0.919131	0.247592	-2.79918	1.0394	0.606263	2.522	5.32118	0.0947	0.1064	0	0	0	0	0	1	0	0	0	0	0	0	0	0	0	0	0	0	0	0	0	0	0	0	0	0	0	0	0	0
32	13045	hypothetical protein	-	-	NT54_RS06830;-	false	true	1	1	0.091328	0.919131	0.247592	-2.79918	1.0394	0.606263	2.522	5.32118	0.0947	0.1064	0	0	0	0	0	1	0	0	0	0	0	0	0	0	0	0	0	0	0	0	0	0	0	0	0	0	0	0	0	0
33	27106	hypothetical protein	-	-	NT56_RS24510;-	false	true	7	7	0.0944702	0.909964	0.239154	-1.14638	1.0247	0.621322	4.27529	5.42167	0.0942	0.1223	0	0	0	0	0	0	1	1	0	0	0	0	1	0	0	0	1	0	0	1	0	0	1	0	0	0	0	0	0	0
34	15477	hypothetical protein	-	-	NR63_RS23840;-	false	true	2	2	0.0953412	0.912474	0.205288	-2.18696	1.02072	0.687637	3.1645	5.35146	0.0983	0.1022	0	0	0	0	0	0	0	0	0	0	0	1	1	0	0	0	0	0	0	0	0	0	0	0	0	0	0	0	0	0
35	21247	hypothetical protein	-	-	Q000_RS20020;Q000_02714	false	true	4	4	0.0989108	0.906937	0.184153	-1.65354	1.00476	0.734821	3.741	5.39454	0.0995	0.0909	0	0	0	0	0	0	0	0	0	0	1	0	1	0	0	0	0	0	0	1	0	0	0	1	0	0	0	0	0	0
36	25934	hypothetical protein	-	-	Q009_RS31190;Q009_04798	false	true	20	18	0.109157	0.894397	0.201815	-0.890732	0.961948	0.695046	4.68494	5.57568	0.1036	0.0936	0	0	1	0	1	0	1	2	1	0	0	0	0	0	0	1	1	1	1	0	0	1	0	1	1	0	0	0	1	0
37	26558	hypothetical protein	-	-	Q009_RS21205;Q009_02715	false	true	3	3	0.111869	0.895423	0.237042	-1.68559	0.95129	0.625174	3.679	5.36459	0.1082	0.1152	0	0	0	0	0	0	0	1	0	0	0	0	0	0	0	0	0	1	0	0	0	1	0	0	0	0	0	0	0	0
38	19914	hypothetical protein	-	-	NT54_RS06915;-	false	true	3	3	0.111869	0.895423	0.249642	-1.64173	0.95129	0.602683	3.72033	5.36206	0.1101	0.1253	0	0	0	0	0	1	0	0	0	0	0	0	0	0	0	0	0	1	0	0	0	0	0	1	0	0	0	0	0	0
39	17927	hypothetical protein	-	-	NS12_RS00695;-	false	true	2	2	0.112489	0.896342	0.216559	-2.13444	0.948888	0.664424	3.215	5.34944	0.1191	0.1103	0	0	0	0	0	0	0	0	0	0	0	0	1	1	0	0	0	0	0	0	0	0	0	0	0	0	0	0	0	0
40	24694	hypothetical protein	-	-	Q002_RS0106505;-	false	true	2	2	0.112489	0.896342	0.252053	-1.98052	0.948888	0.598508	3.363	5.34352	0.119	0.1304	0	1	0	0	0	0	0	0	0	0	0	0	0	0	0	0	0	0	0	0	0	0	0	0	1	0	0	0	0	0
41	1100	lambda family phage tail tape measure protein	-	-	NT56_RS09050;-	false	true	1	1	0.115194	0.897242	0.278294	-2.62686	0.93857	0.555496	2.691	5.31786	0.131	0.1396	0	0	0	0	0	0	0	1	0	0	0	0	0	0	0	0	0	0	0	0	0	0	0	0	0	0	0	0	0	0
42	1790	hypothetical protein	-	-	NT56_RS30930;-	false	true	1	1	0.115194	0.897242	0.278294	-2.62686	0.93857	0.555496	2.691	5.31786	0.131	0.1396	0	0	0	0	0	0	0	1	0	0	0	0	0	0	0	0	0	0	0	0	0	0	0	0	0	0	0	0	0	0
43	23702	hypothetical protein	-	-	NT56_RS08815;-	false	true	1	1	0.115194	0.897242	0.278294	-2.62686	0.93857	0.555496	2.691	5.31786	0.131	0.1396	0	0	0	0	0	0	0	1	0	0	0	0	0	0	0	0	0	0	0	0	0	0	0	0	0	0	0	0	0	0
44	25569	hypothetical protein	-	-	NT56_RS08775;-	false	true	1	1	0.115194	0.897242	0.278294	-2.62686	0.93857	0.555496	2.691	5.31786	0.131	0.1396	0	0	0	0	0	0	0	1	0	0	0	0	0	0	0	0	0	0	0	0	0	0	0	0	0	0	0	0	0	0
45	21244	hypothetical protein	-	-	Q009_RS21165;Q009_02704	false	true	11	9	0.117963	0.886749	0.187048	-1.15718	0.928253	0.728047	4.31044	5.46763	0.1168	0.0927	0	0	0	0	0	0	0	0	0	0	0	2	1	1	0	0	0	1	0	0	1	2	0	1	0	0	0	0	0	0
46	18192	membrane protein	-	-	NT88_RS14445;-	false	true	4	4	0.118056	0.888597	0.341547	-1.18933	0.927911	0.46655	4.1695	5.35883	0.113	0.1724	0	0	0	0	0	1	0	1	0	0	0	0	1	0	0	0	0	0	0	0	0	0	0	0	0	0	0	0	0	0
47	1938	hypothetical protein	-	-	NS86_RS11785;-	false	true	2	2	0.121845	0.887511	0.301256	-1.78968	0.914191	0.521064	3.5465	5.33618	0.1302	0.156	0	0	0	0	1	0	0	0	0	0	0	0	0	0	0	0	0	0	0	0	0	0	1	0	0	0	0	0	0	0
48	7224	integrase	-	-	Q009_RS22135;Q009_02907	false	true	6	5	0.125382	0.880908	0.225788	-1.36522	0.901766	0.646299	4.0334	5.39862	0.124	0.1118	0	0	0	0	0	0	0	0	0	0	0	1	1	1	0	0	0	0	0	0	0	2	0	0	0	0	0	0	0	0
49	16149	hypothetical protein	-	-	Q000_RS14370;Q000_01547	false	true	16	13	0.126899	0.877445	0.255736	-0.872872	0.896542	0.592208	4.61269	5.48556	0.1232	0.1241	0	0	0	0	0	0	1	2	0	0	1	1	2	1	0	0	1	0	0	1	0	0	0	2	0	0	0	0	0	0
50	21443	phage tail assembly protein	-	-	NT88_RS14430;-	false	true	6	6	0.12895	0.876978	0.310377	-1.05735	0.889579	0.508111	4.332	5.38935	0.13	0.1589	0	0	0	0	0	1	0	1	0	0	0	0	1	1	0	0	0	0	0	0	0	0	0	0	0	0	0	0	0	0
51	25237	hypothetical protein	-	-	NT88_RS14435;-	false	true	6	6	0.12895	0.876978	0.310377	-1.05735	0.889579	0.508111	4.332	5.38935	0.13	0.1589	0	0	0	0	0	1	0	1	0	0	0	0	1	1	0	0	0	0	0	0	0	0	0	0	0	0	0	0	0	0
52	9048	phage integrase	-	-	P997_RS26665;P997_04038	false	true	1	1	0.135794	0.878202	0.285721	-2.5871	0.867119	0.544058	2.73	5.3171	0.1637	0.1691	0	0	0	0	0	0	0	0	0	1	0	0	0	0	0	0	0	0	0	0	0	0	0	0	0	0	0	0	0	0
53	16577	hypothetical protein	-	-	NT11_RS29860;-	false	true	1	1	0.135794	0.878202	0.285721	-2.5871	0.867119	0.544058	2.73	5.3171	0.1516	0.1608	0	0	0	0	0	0	0	0	1	0	0	0	0	0	0	0	0	0	0	0	0	0	0	0	0	0	0	0	0	0
54	24392	hypothetical protein	-	-	P997_RS26715;-	false	true	1	1	0.135794	0.878202	0.285721	-2.5871	0.867119	0.544058	2.73	5.3171	0.1637	0.1691	0	0	0	0	0	0	0	0	0	1	0	0	0	0	0	0	0	0	0	0	0	0	0	0	0	0	0	0	0	0
55	13057	hypothetical protein	-	-	Q009_RS0106900;-	false	true	2	2	0.142165	0.868265	0.3189	-1.72624	0.847207	0.496346	3.6075	5.33374	0.1517	0.1658	0	0	0	0	0	0	0	1	0	0	0	0	0	0	0	0	0	0	0	0	0	1	0	0	0	0	0	0	0	0
56	21073	recombinase	-	-	NT54_RS04260;-	false	true	2	2	0.142165	0.868265	0.337491	-1.66176	0.847207	0.471738	3.6695	5.33126	0.1534	0.1818	0	0	0	0	0	1	0	0	0	0	0	0	0	0	0	0	0	0	0	0	0	0	0	1	0	0	0	0	0	0
57	221	bacteriophage protein	PA14_RS03330;PA14_08300	PA0641;-	PA14_RS03330;PA14_08300	false	true	26	26	0.142165	0.861911	0.369971	-0.597769	0.847207	0.431833	4.96846	5.56623	0.1376	0.1817	1	1	1	1	1	1	0	0	0	0	1	1	1	1	0	1	0	0	1	1	1	0	0	0	1	0	0	0	1	0
58	4791	bacteriophage coat protein A	PA14_RS19870;PA14_48930	-	PA14_RS19870;PA14_48930	false	true	11	11	0.146147	0.858927	0.428649	-0.646692	0.835212	0.367898	4.75745	5.40415	0.1508	0.2237	0	0	0	1	0	1	1	1	0	0	0	0	0	0	1	0	1	0	0	0	0	0	0	1	0	0	0	0	0	0
59	10038	P-type conjugative transfer protein TrbG	-	-	NT49_RS27805;-	false	true	2	2	0.15314	0.857835	0.255858	-1.96492	0.814911	0.592001	3.378	5.34292	0.1653	0.1372	0	0	0	0	0	0	0	0	0	0	0	0	0	1	0	0	1	0	0	0	0	0	0	0	0	0	0	0	0	0
60	12788	conjugal transfer protein TraL	-	-	NT49_RS27885;-	false	true	2	2	0.15314	0.857835	0.255858	-1.96492	0.814911	0.592001	3.378	5.34292	0.1653	0.1372	0	0	0	0	0	0	0	0	0	0	0	0	0	1	0	0	1	0	0	0	0	0	0	0	0	0	0	0	0	0
61	11907	hypothetical protein	-	-	NT56_RS24565;-	false	true	2	2	0.15314	0.857835	0.334447	-1.67216	0.814911	0.475672	3.6595	5.33166	0.1532	0.1695	0	0	0	0	0	0	0	1	0	0	0	0	0	0	0	0	0	0	0	0	0	0	1	0	0	0	0	0	0	0
62	13696	hypothetical protein	PA14_RS24055;PA14_58960	-	PA14_RS24055;PA14_58960	false	true	29	28	0.158558	0.845841	0.219683	-0.817893	0.799811	0.658203	4.88986	5.70775	0.1519	0.1058	0	1	1	1	0	0	0	0	1	1	1	1	1	0	0	1	0	1	1	1	1	0	0	0	1	0	1	1	1	1
63	17	hypothetical protein	-	-	Q000_RS19795;Q000_02662	false	true	1	1	0.158784	0.85681	0.307161	-2.47596	0.799192	0.512634	2.839	5.31496	0.1896	0.1988	0	0	0	0	0	0	0	0	0	0	1	0	0	0	0	0	0	0	0	0	0	0	0	0	0	0	0	0	0	0
64	5518	hypothetical protein	-	-	Q000_RS20030;Q000_02716	false	true	1	1	0.158784	0.85681	0.307161	-2.47596	0.799192	0.512634	2.839	5.31496	0.1896	0.1988	0	0	0	0	0	0	0	0	0	0	1	0	0	0	0	0	0	0	0	0	0	0	0	0	0	0	0	0	0	0
65	7823	hypothetical protein	-	-	Q000_RS20040;Q000_02718	false	true	1	1	0.158784	0.85681	0.307161	-2.47596	0.799192	0.512634	2.839	5.31496	0.1896	0.1988	0	0	0	0	0	0	0	0	0	0	1	0	0	0	0	0	0	0	0	0	0	0	0	0	0	0	0	0	0	0
66	8598	hypothetical protein	-	-	Q000_RS14320;Q000_01533	false	true	1	1	0.158784	0.85681	0.307161	-2.47596	0.799192	0.512634	2.839	5.31496	0.1896	0.1988	0	0	0	0	0	0	0	0	0	0	1	0	0	0	0	0	0	0	0	0	0	0	0	0	0	0	0	0	0	0
67	10137	hypothetical protein	-	-	Q000_RS14270;Q000_01522	false	true	1	1	0.158784	0.85681	0.307161	-2.47596	0.799192	0.512634	2.839	5.31496	0.1896	0.1988	0	0	0	0	0	0	0	0	0	0	1	0	0	0	0	0	0	0	0	0	0	0	0	0	0	0	0	0	0	0
68	11996	transcriptional regulator	-	-	NT05_RS06400;-	false	true	4	4	0.168139	0.840347	0.316728	-1.25135	0.774331	0.499314	4.11225	5.3636	0.1717	0.1631	0	0	0	0	0	0	0	0	0	1	0	0	0	0	0	0	0	1	0	0	0	0	0	1	0	1	0	0	0	0
69	23127	hypothetical protein	-	-	NT56_RS08795;-	false	true	3	3	0.173117	0.836745	0.342235	-1.35732	0.761662	0.465676	3.98833	5.34565	0.1738	0.1841	0	0	0	0	0	0	0	1	0	0	0	0	1	0	0	0	0	0	0	0	0	0	0	0	0	0	0	0	0	0
70	4633	hypothetical protein	-	-	NR63_RS31360;-	false	true	1	1	0.175453	0.841216	0.370223	-2.17518	0.75584	0.431536	3.134	5.30918	0.21	0.2109	0	0	0	0	0	0	0	0	0	0	0	1	0	0	0	0	0	0	0	0	0	0	0	0	0	0	0	0	0	0
71	14953	hypothetical protein	-	-	NR63_RS18950;-	false	true	1	1	0.175453	0.841216	0.370223	-2.17518	0.75584	0.431536	3.134	5.30918	0.21	0.2109	0	0	0	0	0	0	0	0	0	0	0	1	0	0	0	0	0	0	0	0	0	0	0	0	0	0	0	0	0	0
72	17610	hypothetical protein	-	-	NR63_RS18910;-	false	true	1	1	0.175453	0.841216	0.370223	-2.17518	0.75584	0.431536	3.134	5.30918	0.21	0.2109	0	0	0	0	0	0	0	0	0	0	0	1	0	0	0	0	0	0	0	0	0	0	0	0	0	0	0	0	0	0
73	19987	hypothetical protein	-	-	NR63_RS31355;-	false	true	1	1	0.175453	0.841216	0.370223	-2.17518	0.75584	0.431536	3.134	5.30918	0.21	0.2109	0	0	0	0	0	0	0	0	0	0	0	1	0	0	0	0	0	0	0	0	0	0	0	0	0	0	0	0	0	0
74	21089	hypothetical protein	-	-	NR63_RS18905;-	false	true	1	1	0.175453	0.841216	0.370223	-2.17518	0.75584	0.431536	3.134	5.30918	0.21	0.2109	0	0	0	0	0	0	0	0	0	0	0	1	0	0	0	0	0	0	0	0	0	0	0	0	0	0	0	0	0	0
75	24617	hypothetical protein	-	-	NR63_RS23830;-	false	true	1	1	0.175453	0.841216	0.370223	-2.17518	0.75584	0.431536	3.134	5.30918	0.21	0.2109	0	0	0	0	0	0	0	0	0	0	0	1	0	0	0	0	0	0	0	0	0	0	0	0	0	0	0	0	0	0
76	24854	hypothetical protein	-	-	NR63_RS31390;-	false	true	1	1	0.175453	0.841216	0.370223	-2.17518	0.75584	0.431536	3.134	5.30918	0.21	0.2109	0	0	0	0	0	0	0	0	0	0	0	1	0	0	0	0	0	0	0	0	0	0	0	0	0	0	0	0	0	0
77	3694	hypothetical protein	-	-	PABE177_RS05495;PABE177_1019	false	true	2	2	0.176732	0.835337	0.332781	-1.67788	0.752684	0.477842	3.654	5.33188	0.1845	0.1751	0	0	0	0	0	0	0	0	0	0	0	0	1	0	0	0	0	0	0	1	0	0	0	0	0	0	0	0	0	0
78	14898	hypothetical protein	-	-	PABE177_RS12655;PABE177_2364	false	true	2	2	0.176732	0.835337	0.332781	-1.67788	0.752684	0.477842	3.654	5.33188	0.1845	0.1751	0	0	0	0	0	0	0	0	0	0	0	0	1	0	0	0	0	0	0	1	0	0	0	0	0	0	0	0	0	0
79	209	host specificity protein	-	-	Q009_RS22160;Q009_02914	false	true	4	4	0.181403	0.827511	0.320445	-1.24188	0.741357	0.494247	4.121	5.36287	0.1806	0.165	0	0	0	0	0	0	0	0	0	0	0	1	0	1	0	0	0	0	0	0	0	1	0	0	0	0	0	0	0	0
80	737	hypothetical protein	-	-	PABE173_RS20250;PABE173_3742	false	true	1	1	0.193189	0.824547	0.384173	-2.11298	0.714017	0.415473	3.195	5.30798	0.2293	0.2301	0	0	0	0	0	0	0	0	0	0	0	0	1	0	0	0	0	0	0	0	0	0	0	0	0	0	0	0	0	0
81	968	tape measure domain-containing protein	-	-	PABE173_RS35740;-	false	true	2	1	0.193189	0.824547	0.384173	-2.11298	0.714017	0.415473	3.195	5.30798	0.2293	0.2301	0	0	0	0	0	0	0	0	0	0	0	0	2	0	0	0	0	0	0	0	0	0	0	0	0	0	0	0	0	0
82	9706	hypothetical protein	-	-	PABE173_RS36005;PABE173_3802	false	true	1	1	0.193189	0.824547	0.384173	-2.11298	0.714017	0.415473	3.195	5.30798	0.2293	0.2301	0	0	0	0	0	0	0	0	0	0	0	0	1	0	0	0	0	0	0	0	0	0	0	0	0	0	0	0	0	0
83	14290	hypothetical protein	-	-	PABE173_RS20510;PABE173_3788	false	true	1	1	0.193189	0.824547	0.384173	-2.11298	0.714017	0.415473	3.195	5.30798	0.2293	0.2301	0	0	0	0	0	0	0	0	0	0	0	0	1	0	0	0	0	0	0	0	0	0	0	0	0	0	0	0	0	0
84	17824	hypothetical protein	-	-	PABE173_RS20605;PABE173_3804	false	true	1	1	0.193189	0.824547	0.384173	-2.11298	0.714017	0.415473	3.195	5.30798	0.2293	0.2301	0	0	0	0	0	0	0	0	0	0	0	0	1	0	0	0	0	0	0	0	0	0	0	0	0	0	0	0	0	0
85	23344	hypothetical protein	-	-	PABE173_RS20520;PABE173_3790	false	true	1	1	0.193189	0.824547	0.384173	-2.11298	0.714017	0.415473	3.195	5.30798	0.2293	0.2301	0	0	0	0	0	0	0	0	0	0	0	0	1	0	0	0	0	0	0	0	0	0	0	0	0	0	0	0	0	0
86	1478	tape measure domain-containing protein	-	-	Q009_RS27580;Q009_04047	false	true	6	6	0.203093	0.804904	0.506603	-0.69429	0.692306	0.295332	4.65317	5.34746	0.2089	0.2655	0	0	1	0	0	0	0	0	0	1	0	0	0	0	0	0	0	0	0	0	0	1	0	1	0	1	0	0	0	0
87	12194	hypothetical protein	-	-	Q009_RS27590;Q009_04050	false	true	6	6	0.203093	0.804904	0.506603	-0.69429	0.692306	0.295332	4.65317	5.34746	0.2089	0.2655	0	0	1	0	0	0	0	0	0	1	0	0	0	0	0	0	0	0	0	0	0	1	0	1	0	1	0	0	0	0
88	15766	hypothetical protein	-	-	Q009_RS27600;Q009_04052	false	true	6	6	0.203093	0.804904	0.506603	-0.69429	0.692306	0.295332	4.65317	5.34746	0.2089	0.2655	0	0	1	0	0	0	0	0	0	1	0	0	0	0	0	0	0	0	0	0	0	1	0	1	0	1	0	0	0	0
89	17638	hypothetical protein	-	-	Q009_RS27575;Q009_04046	false	true	6	6	0.203093	0.804904	0.506603	-0.69429	0.692306	0.295332	4.65317	5.34746	0.2089	0.2655	0	0	1	0	0	0	0	0	0	1	0	0	0	0	0	0	0	0	0	0	0	1	0	1	0	1	0	0	0	0
90	815	phage tail tape measure protein	-	-	NS12_RS00500;-	false	true	1	1	0.211979	0.806811	0.393487	-2.0722	0.673707	0.40507	3.235	5.3072	0.2502	0.2516	0	0	0	0	0	0	0	0	0	0	0	0	0	1	0	0	0	0	0	0	0	0	0	0	0	0	0	0	0	0
91	5707	replication protein RepA	-	-	NS12_RS28190;-	false	true	1	1	0.211979	0.806811	0.393487	-2.0722	0.673707	0.40507	3.235	5.3072	0.2502	0.2516	0	0	0	0	0	0	0	0	0	0	0	0	0	1	0	0	0	0	0	0	0	0	0	0	0	0	0	0	0	0
92	5767	reverse transcriptase	-	-	NS12_RS00710;-	false	true	1	1	0.211979	0.806811	0.393487	-2.0722	0.673707	0.40507	3.235	5.3072	0.2502	0.2516	0	0	0	0	0	0	0	0	0	0	0	0	0	1	0	0	0	0	0	0	0	0	0	0	0	0	0	0	0	0
93	7380	hypothetical protein	-	-	NS12_RS19840;-	false	true	1	1	0.211979	0.806811	0.393487	-2.0722	0.673707	0.40507	3.235	5.3072	0.2502	0.2516	0	0	0	0	0	0	0	0	0	0	0	0	0	1	0	0	0	0	0	0	0	0	0	0	0	0	0	0	0	0
94	7603	hypothetical protein	-	-	NS12_RS00455;-	false	true	1	1	0.211979	0.806811	0.393487	-2.0722	0.673707	0.40507	3.235	5.3072	0.2502	0.2516	0	0	0	0	0	0	0	0	0	0	0	0	0	1	0	0	0	0	0	0	0	0	0	0	0	0	0	0	0	0
95	10724	hypothetical protein	-	-	NS12_RS29525;-	false	true	1	1	0.211979	0.806811	0.393487	-2.0722	0.673707	0.40507	3.235	5.3072	0.2502	0.2516	0	0	0	0	0	0	0	0	0	0	0	0	0	1	0	0	0	0	0	0	0	0	0	0	0	0	0	0	0	0
96	10811	hypothetical protein	-	-	NS12_RS19850;-	false	true	1	1	0.211979	0.806811	0.393487	-2.0722	0.673707	0.40507	3.235	5.3072	0.2502	0.2516	0	0	0	0	0	0	0	0	0	0	0	0	0	1	0	0	0	0	0	0	0	0	0	0	0	0	0	0	0	0
97	11059	hypothetical protein	-	-	NS12_RS29520;-	false	true	1	1	0.211979	0.806811	0.393487	-2.0722	0.673707	0.40507	3.235	5.3072	0.2502	0.2516	0	0	0	0	0	0	0	0	0	0	0	0	0	1	0	0	0	0	0	0	0	0	0	0	0	0	0	0	0	0
98	20347	hypothetical protein	-	-	NS12_RS00770;-	false	true	1	1	0.211979	0.806811	0.393487	-2.0722	0.673707	0.40507	3.235	5.3072	0.2502	0.2516	0	0	0	0	0	0	0	0	0	0	0	0	0	1	0	0	0	0	0	0	0	0	0	0	0	0	0	0	0	0
99	25021	hypothetical protein	-	-	NS12_RS00585;-	false	true	1	1	0.211979	0.806811	0.393487	-2.0722	0.673707	0.40507	3.235	5.3072	0.2502	0.2516	0	0	0	0	0	0	0	0	0	0	0	0	0	1	0	0	0	0	0	0	0	0	0	0	0	0	0	0	0	0
100	12767	single-stranded DNA-binding protein	-	-	NT05_RS30860;-	false	true	2	2	0.216186	0.797499	0.438812	-1.34352	0.665172	0.357721	3.9755	5.31902	0.2188	0.234	0	0	0	0	0	0	0	0	0	0	0	1	0	0	0	0	0	0	0	0	0	0	0	1	0	0	0	0	0	0
101	15095	exonuclease	-	-	NT05_RS30855;-	false	true	2	2	0.216186	0.797499	0.438812	-1.34352	0.665172	0.357721	3.9755	5.31902	0.2188	0.234	0	0	0	0	0	0	0	0	0	0	0	1	0	0	0	0	0	0	0	0	0	0	0	1	0	0	0	0	0	0
102	22661	hypothetical protein	-	-	ACP77_RS05410;-	false	true	14	13	0.22025	0.78596	0.585669	-0.420769	0.657084	0.232348	4.95177	5.37254	0.2184	0.2905	0	0	1	0	0	1	0	0	0	1	0	2	1	1	0	0	0	1	0	0	0	0	0	1	0	0	0	0	0	0
103	9182	integrating conjugative element protein	PA14_RS24485;PA14_59990	-	PA14_RS24485;PA14_59990	false	true	36	34	0.229487	0.776305	0.320611	-0.695353	0.639242	0.494022	5.02665	5.722	0.223	0.156	1	1	1	1	0	0	0	0	1	1	1	1	1	0	0	1	0	2	1	1	1	1	0	1	1	0	1	1	1	1
104	21284	hypothetical protein	PA14_RS24495;PA14_60010	-	PA14_RS24495;PA14_60010	false	true	34	34	0.229487	0.776305	0.320611	-0.695353	0.639242	0.494022	5.02665	5.722	0.223	0.156	1	1	1	1	0	0	0	0	1	1	1	1	1	0	0	1	0	1	1	1	1	1	0	1	1	0	1	1	1	1
105	16743	hypothetical protein	-	-	Q009_RS27560;Q009_04043	false	true	8	8	0.238806	0.768986	0.471046	-0.666955	0.621954	0.326937	4.703	5.36995	0.2328	0.2349	0	0	1	0	0	0	0	0	0	1	0	0	1	0	0	0	0	0	0	1	0	1	0	0	0	0	0	0	0	0
106	17857	phage protein	-	-	NT80_RS19270;-	false	true	4	4	0.251541	0.75928	0.556989	-0.7365	0.599391	0.254153	4.5875	5.324	0.2483	0.2887	0	0	0	0	0	0	0	0	0	0	0	1	1	1	0	0	0	0	0	0	0	0	0	0	0	0	0	0	0	0
107	6100	transcriptional regulator	PA14_RS28275;PA14_69370	PA5253;-	PA14_RS28275;PA14_69370	false	true	43	43	0.25685	0.750884	0.405473	-0.733494	0.59032	0.392038	5.1404	5.87389	0.2453	0.196	1	1	0	1	1	1	1	1	1	1	1	1	1	1	0	1	1	1	1	1	0	1	1	1	1	0	0	1	1	1
108	9045	integrase	-	-	PACI27_RS21865;-	false	true	2	2	0.260311	0.754893	0.499978	-1.1714	0.584507	0.301049	4.141	5.3124	0.2572	0.2669	0	0	0	0	0	0	0	1	0	0	0	0	0	0	0	0	0	0	0	0	0	0	0	0	0	0	0	0	0	0
109	25603	hypothetical protein	-	-	PACI27_RS21860;PACI27_4191	false	true	2	2	0.260311	0.754893	0.499978	-1.1714	0.584507	0.301049	4.141	5.3124	0.2572	0.2669	0	0	0	0	0	0	0	1	0	0	0	0	0	0	0	0	0	0	0	0	0	0	0	0	0	0	0	0	0	0
110	15731	bacteriophage lambda NinG family protein	-	-	NS12_RS00620;-	false	true	4	4	0.262614	0.748459	0.605058	-0.64875	0.580682	0.218203	4.6685	5.31725	0.26	0.3181	0	0	0	0	0	0	0	0	0	0	0	1	1	1	0	0	0	0	0	0	0	0	0	0	0	0	0	0	0	0
111	22779	heavy metal transporter	-	-	Q012_RS38570;Q012_06381	false	true	3	3	0.265019	0.747676	0.465492	-1.04497	0.576723	0.332088	4.28267	5.32763	0.2652	0.2519	0	0	0	0	0	0	0	0	0	0	0	0	1	0	0	0	0	0	0	1	0	0	0	0	0	0	0	0	0	1
112	964	transporter	-	-	NT49_RS27835;-	false	true	1	1	0.27436	0.747394	0.463851	-1.78059	0.561679	0.333622	3.521	5.30159	0.3131	0.3252	0	0	0	0	0	0	0	0	0	0	0	0	0	0	0	0	1	0	0	0	0	0	0	0	0	0	0	0	0	0
113	1156	phage tail fiber protein	-	-	NT49_RS00400;-	false	true	1	1	0.27436	0.747394	0.463851	-1.78059	0.561679	0.333622	3.521	5.30159	0.3131	0.3252	0	0	0	0	0	0	0	0	0	0	0	0	0	0	0	0	1	0	0	0	0	0	0	0	0	0	0	0	0	0
114	8762	P-type conjugative transfer ATPase TrbB	-	-	NT49_RS27850;-	false	true	1	1	0.27436	0.747394	0.463851	-1.78059	0.561679	0.333622	3.521	5.30159	0.3131	0.3252	0	0	0	0	0	0	0	0	0	0	0	0	0	0	0	0	1	0	0	0	0	0	0	0	0	0	0	0	0	0
115	9094	cell division protein FtsK	-	-	NT49_RS22060;-	false	true	1	1	0.27436	0.747394	0.463851	-1.78059	0.561679	0.333622	3.521	5.30159	0.3131	0.3252	0	0	0	0	0	0	0	0	0	0	0	0	0	0	0	0	1	0	0	0	0	0	0	0	0	0	0	0	0	0
116	18654	conjugal transfer protein TrbC	-	-	NT49_RS27845;-	false	true	1	1	0.27436	0.747394	0.463851	-1.78059	0.561679	0.333622	3.521	5.30159	0.3131	0.3252	0	0	0	0	0	0	0	0	0	0	0	0	0	0	0	0	1	0	0	0	0	0	0	0	0	0	0	0	0	0
117	23379	conjugal transfer protein TrbD	-	-	NT49_RS27840;-	false	true	1	1	0.27436	0.747394	0.463851	-1.78059	0.561679	0.333622	3.521	5.30159	0.3131	0.3252	0	0	0	0	0	0	0	0	0	0	0	0	0	0	0	0	1	0	0	0	0	0	0	0	0	0	0	0	0	0
118	1177	hypothetical protein	-	-	Q009_RS38320;Q009_06273	false	true	2	2	0.275988	0.739689	0.51229	-1.13812	0.55911	0.290484	4.173	5.31112	0.2729	0.2782	0	0	0	0	0	0	0	0	0	0	0	0	0	0	0	0	0	1	0	0	0	1	0	0	0	0	0	0	0	0
119	2831	hypothetical protein	-	-	Q009_RS38350;Q009_06280	false	true	2	2	0.275988	0.739689	0.51229	-1.13812	0.55911	0.290484	4.173	5.31112	0.2729	0.2782	0	0	0	0	0	0	0	0	0	0	0	0	0	0	0	0	0	1	0	0	0	1	0	0	0	0	0	0	0	0
120	3918	hypothetical protein	-	-	Q009_RS0107820;-	false	true	2	2	0.275988	0.739689	0.51229	-1.13812	0.55911	0.290484	4.173	5.31112	0.2729	0.2782	0	0	0	0	0	0	0	0	0	0	0	0	0	0	0	0	0	1	0	0	0	1	0	0	0	0	0	0	0	0
121	8589	hypothetical protein	-	-	Q009_RS38335;Q009_06277	false	true	2	2	0.275988	0.739689	0.51229	-1.13812	0.55911	0.290484	4.173	5.31112	0.2729	0.2782	0	0	0	0	0	0	0	0	0	0	0	0	0	0	0	0	0	1	0	0	0	1	0	0	0	0	0	0	0	0
122	14015	peptidase	-	-	Q009_RS38340;Q009_06278	false	true	2	2	0.275988	0.739689	0.51229	-1.13812	0.55911	0.290484	4.173	5.31112	0.2729	0.2782	0	0	0	0	0	0	0	0	0	0	0	0	0	0	0	0	0	1	0	0	0	1	0	0	0	0	0	0	0	0
123	15039	hypothetical protein	-	-	Q009_RS38325;Q009_06274	false	true	2	2	0.275988	0.739689	0.51229	-1.13812	0.55911	0.290484	4.173	5.31112	0.2729	0.2782	0	0	0	0	0	0	0	0	0	0	0	0	0	0	0	0	0	1	0	0	0	1	0	0	0	0	0	0	0	0
124	15649	hypothetical protein	-	-	Q009_RS21200;Q009_02713	false	true	2	2	0.275988	0.739689	0.51229	-1.13812	0.55911	0.290484	4.173	5.31112	0.2729	0.2782	0	0	0	0	0	0	0	0	0	0	0	0	0	0	0	0	0	1	0	0	0	1	0	0	0	0	0	0	0	0
125	18761	hypothetical protein	-	-	Q009_RS38330;Q009_06276	false	true	2	2	0.275988	0.739689	0.51229	-1.13812	0.55911	0.290484	4.173	5.31112	0.2729	0.2782	0	0	0	0	0	0	0	0	0	0	0	0	0	0	0	0	0	1	0	0	0	1	0	0	0	0	0	0	0	0
126	23094	hypothetical protein	-	-	Q009_RS38345;Q009_06279	false	true	2	2	0.275988	0.739689	0.51229	-1.13812	0.55911	0.290484	4.173	5.31112	0.2729	0.2782	0	0	0	0	0	0	0	0	0	0	0	0	0	0	0	0	0	1	0	0	0	1	0	0	0	0	0	0	0	0
127	25246	hypothetical protein	-	-	Q009_RS38355;Q009_06281	false	true	2	2	0.275988	0.739689	0.51229	-1.13812	0.55911	0.290484	4.173	5.31112	0.2729	0.2782	0	0	0	0	0	0	0	0	0	0	0	0	0	0	0	0	0	1	0	0	0	1	0	0	0	0	0	0	0	0
128	26222	hypothetical protein	-	-	Q009_RS38365;Q009_06284	false	true	2	2	0.275988	0.739689	0.51229	-1.13812	0.55911	0.290484	4.173	5.31112	0.2729	0.2782	0	0	0	0	0	0	0	0	0	0	0	0	0	0	0	0	0	1	0	0	0	1	0	0	0	0	0	0	0	0
129	27968	hypothetical protein	-	-	Q009_RS0107825;-	false	true	2	2	0.275988	0.739689	0.51229	-1.13812	0.55911	0.290484	4.173	5.31112	0.2729	0.2782	0	0	0	0	0	0	0	0	0	0	0	0	0	0	0	0	0	1	0	0	0	1	0	0	0	0	0	0	0	0
130	582	conjugative transfer ATPase, PFL_4706 family	PA14_RS24460;PA14_59940	-	-	false	true	37	35	0.279197	0.727322	0.366175	-0.642188	0.554089	0.436312	5.0574	5.69959	0.2687	0.1794	1	1	1	1	0	0	0	0	1	1	1	1	1	0	0	1	0	1	1	1	1	1	0	1	1	0	1	1	1	1
131	19120	conjugal transfer protein	PA14_RS24455;PA14_59930	-	PA14_RS24455;PA14_59930	false	true	36	35	0.279197	0.727322	0.366175	-0.642188	0.554089	0.436312	5.0574	5.69959	0.2687	0.1794	1	1	1	1	0	0	0	0	1	1	1	1	1	0	0	1	0	1	1	1	1	1	0	1	1	0	1	1	1	1
132	17925	hypothetical protein	-	-	PACIG1_RS04990;PACIG1_0955	false	true	4	4	0.285485	0.726068	0.523436	-0.799875	0.544417	0.281136	4.529	5.32888	0.2818	0.2717	0	0	0	0	0	0	0	0	0	0	0	0	0	0	0	0	0	1	0	0	1	0	0	1	0	1	0	0	0	0
133	8683	integrase	-	-	NS86_RS20295;-	false	true	5	5	0.288174	0.722327	0.489384	-0.783038	0.540346	0.31035	4.5596	5.34264	0.2867	0.2574	0	0	0	0	0	0	0	0	0	0	0	0	1	0	0	0	0	0	0	1	0	0	1	0	0	1	0	0	0	0
134	739	tail protein	-	-	Q009_RS17860;Q009_02028	false	true	3	3	0.291347	0.721969	0.508563	-0.94698	0.535589	0.293655	4.375	5.32198	0.2961	0.2749	0	0	0	0	0	0	0	0	0	0	0	0	0	0	0	0	1	0	0	0	0	1	0	0	0	1	0	0	0	0
135	2090	terminase	-	-	Q009_RS17760;Q009_02008	false	true	3	3	0.291347	0.721969	0.508563	-0.94698	0.535589	0.293655	4.375	5.32198	0.2961	0.2749	0	0	0	0	0	0	0	0	0	0	0	0	0	0	0	0	1	0	0	0	0	1	0	0	0	1	0	0	0	0
136	3155	portal protein	-	-	Q009_RS17770;Q009_02010	false	true	3	3	0.291347	0.721969	0.508563	-0.94698	0.535589	0.293655	4.375	5.32198	0.2961	0.2749	0	0	0	0	0	0	0	0	0	0	0	0	0	0	0	0	1	0	0	0	0	1	0	0	0	1	0	0	0	0
137	5905	hypothetical protein	-	-	Q009_RS17775;Q009_02011	false	true	3	3	0.291347	0.721969	0.508563	-0.94698	0.535589	0.293655	4.375	5.32198	0.2961	0.2749	0	0	0	0	0	0	0	0	0	0	0	0	0	0	0	0	1	0	0	0	0	1	0	0	0	1	0	0	0	0
138	7904	phage late control protein	-	-	Q009_RS17875;Q009_02031	false	true	3	3	0.291347	0.721969	0.508563	-0.94698	0.535589	0.293655	4.375	5.32198	0.2961	0.2749	0	0	0	0	0	0	0	0	0	0	0	0	0	0	0	0	1	0	0	0	0	1	0	0	0	1	0	0	0	0
139	8110	minor capsid protein E	-	-	Q009_RS17785;Q009_02013	false	true	3	3	0.291347	0.721969	0.508563	-0.94698	0.535589	0.293655	4.375	5.32198	0.2961	0.2749	0	0	0	0	0	0	0	0	0	0	0	0	0	0	0	0	1	0	0	0	0	1	0	0	0	1	0	0	0	0
140	10546	baseplate assembly protein	-	-	Q009_RS17825;Q009_02021	false	true	3	3	0.291347	0.721969	0.508563	-0.94698	0.535589	0.293655	4.375	5.32198	0.2961	0.2749	0	0	0	0	0	0	0	0	0	0	0	0	0	0	0	0	1	0	0	0	0	1	0	0	0	1	0	0	0	0
141	11250	phage tail protein	-	-	Q009_RS17865;Q009_02029	false	true	3	3	0.291347	0.721969	0.508563	-0.94698	0.535589	0.293655	4.375	5.32198	0.2961	0.2749	0	0	0	0	0	0	0	0	0	0	0	0	0	0	0	0	1	0	0	0	0	1	0	0	0	1	0	0	0	0
142	14255	hypothetical protein	-	-	Q009_RS17800;Q009_02016	false	true	3	3	0.291347	0.721969	0.508563	-0.94698	0.535589	0.293655	4.375	5.32198	0.2961	0.2749	0	0	0	0	0	0	0	0	0	0	0	0	0	0	0	0	1	0	0	0	0	1	0	0	0	1	0	0	0	0
143	16477	phage baseplate protein	-	-	Q009_RS17810;Q009_02018	false	true	3	3	0.291347	0.721969	0.508563	-0.94698	0.535589	0.293655	4.375	5.32198	0.2961	0.2749	0	0	0	0	0	0	0	0	0	0	0	0	0	0	0	0	1	0	0	0	0	1	0	0	0	1	0	0	0	0
144	16915	hypothetical protein	-	-	Q009_RS17805;Q009_02017	false	true	3	3	0.291347	0.721969	0.508563	-0.94698	0.535589	0.293655	4.375	5.32198	0.2961	0.2749	0	0	0	0	0	0	0	0	0	0	0	0	0	0	0	0	1	0	0	0	0	1	0	0	0	1	0	0	0	0
145	17043	phage tail protein I	-	-	Q009_RS17830;Q009_02022	false	true	3	3	0.291347	0.721969	0.508563	-0.94698	0.535589	0.293655	4.375	5.32198	0.2961	0.2749	0	0	0	0	0	0	0	0	0	0	0	0	0	0	0	0	1	0	0	0	0	1	0	0	0	1	0	0	0	0
146	18602	phage tail protein	-	-	Q009_RS17840;Q009_02024	false	true	3	3	0.291347	0.721969	0.508563	-0.94698	0.535589	0.293655	4.375	5.32198	0.2961	0.2749	0	0	0	0	0	0	0	0	0	0	0	0	0	0	0	0	1	0	0	0	0	1	0	0	0	1	0	0	0	0
147	21753	hypothetical protein	-	-	Q009_RS17780;Q009_02012	false	true	3	3	0.291347	0.721969	0.508563	-0.94698	0.535589	0.293655	4.375	5.32198	0.2961	0.2749	0	0	0	0	0	0	0	0	0	0	0	0	0	0	0	0	1	0	0	0	0	1	0	0	0	1	0	0	0	0
148	22988	hypothetical protein	-	-	Q009_RS17795;Q009_02015	false	true	3	3	0.291347	0.721969	0.508563	-0.94698	0.535589	0.293655	4.375	5.32198	0.2961	0.2749	0	0	0	0	0	0	0	0	0	0	0	0	0	0	0	0	1	0	0	0	0	1	0	0	0	1	0	0	0	0
149	26965	hypothetical protein	-	-	Q009_RS17765;Q009_02009	false	true	3	3	0.291347	0.721969	0.508563	-0.94698	0.535589	0.293655	4.375	5.32198	0.2961	0.2749	0	0	0	0	0	0	0	0	0	0	0	0	0	0	0	0	1	0	0	0	0	1	0	0	0	1	0	0	0	0
150	24531	hypothetical protein	-	-	ACP77_RS05705;-	false	true	5	5	0.293493	0.7171	0.958544	-0.0590213	0.532402	0.0183879	5.214	5.27302	0.2938	0.4952	0	0	1	0	0	1	0	0	0	1	0	0	0	0	0	0	0	0	0	0	0	0	0	0	0	0	0	0	0	0
151	3954	hypothetical protein	-	-	Q011_RS20245;-	false	true	1	1	0.297	0.72564	0.544685	-1.47369	0.527244	0.263855	3.822	5.29569	0.3254	0.3299	0	0	0	0	0	0	0	0	0	0	0	0	0	0	0	0	0	1	0	0	0	0	0	0	0	0	0	0	0	0
152	8433	hypothetical protein	-	-	Q011_RS20105;Q011_02558	false	true	1	1	0.297	0.72564	0.544685	-1.47369	0.527244	0.263855	3.822	5.29569	0.3254	0.3299	0	0	0	0	0	0	0	0	0	0	0	0	0	0	0	0	0	1	0	0	0	0	0	0	0	0	0	0	0	0
153	16889	hypothetical protein	-	-	Q011_RS20210;Q011_02582	false	true	1	1	0.297	0.72564	0.544685	-1.47369	0.527244	0.263855	3.822	5.29569	0.3254	0.3299	0	0	0	0	0	0	0	0	0	0	0	0	0	0	0	0	0	1	0	0	0	0	0	0	0	0	0	0	0	0
154	18538	hypothetical protein	-	-	Q011_RS20120;Q011_02561	false	true	1	1	0.297	0.72564	0.544685	-1.47369	0.527244	0.263855	3.822	5.29569	0.3254	0.3299	0	0	0	0	0	0	0	0	0	0	0	0	0	0	0	0	0	1	0	0	0	0	0	0	0	0	0	0	0	0
155	26871	hypothetical protein	-	-	Q011_RS0106925;-	false	true	1	1	0.297	0.72564	0.544685	-1.47369	0.527244	0.263855	3.822	5.29569	0.3254	0.3299	0	0	0	0	0	0	0	0	0	0	0	0	0	0	0	0	0	1	0	0	0	0	0	0	0	0	0	0	0	0
156	26943	hypothetical protein	-	-	Q011_RS20250;Q011_02594	false	true	1	1	0.297	0.72564	0.544685	-1.47369	0.527244	0.263855	3.822	5.29569	0.3254	0.3299	0	0	0	0	0	0	0	0	0	0	0	0	0	0	0	0	0	1	0	0	0	0	0	0	0	0	0	0	0	0
157	24664	hypothetical protein	-	-	PACI27_RS21650;PACI27_4158	false	true	4	4	0.297265	0.714515	0.507045	-0.831562	0.526856	0.294953	4.49975	5.33131	0.2921	0.2661	0	0	0	0	0	0	0	0	0	0	0	1	1	0	0	0	0	0	0	0	0	0	0	0	0	0	0	0	0	0
158	25505	hypothetical protein	-	-	NT54_RS06895;-	false	true	5	5	0.298858	0.711826	0.697834	-0.440502	0.524535	0.156248	4.8692	5.3097	0.2907	0.3599	0	0	1	0	0	1	0	0	0	0	0	0	0	0	0	0	0	0	0	0	0	0	0	1	0	0	0	0	0	0
159	3892	O-methyltransferase	PA14_RS24280;PA14_59530	-	PA14_RS24280;PA14_59530	false	true	25	23	0.302966	0.703438	0.61137	-0.342012	0.518607	0.213696	5.07661	5.41862	0.2882	0.2943	0	1	1	1	0	0	0	0	0	0	1	1	1	0	0	0	0	2	1	1	1	1	0	1	0	0	0	2	0	1
160	20897	hypothetical protein	-	-	Q009_RS21155;Q009_02702	false	true	4	3	0.304953	0.708653	0.538415	-0.881537	0.515767	0.268882	4.43667	5.3182	0.3046	0.2884	0	0	0	0	0	0	0	0	0	0	0	0	1	0	0	0	0	0	0	0	0	2	0	0	0	0	0	0	0	0
161	14796	hypothetical protein	-	-	NT56_RS08790;-	false	true	3	3	0.304953	0.708653	0.584648	-0.783551	0.515767	0.233105	4.529	5.31255	0.3028	0.3053	0	0	0	0	0	0	0	1	0	0	0	0	0	0	0	0	0	0	0	0	0	0	0	1	0	0	0	0	0	0
162	21154	hypothetical protein	-	-	Q009_RS22150;Q009_02910	false	true	2	2	0.308667	0.707885	0.570139	-0.9868	0.51051	0.244019	4.3185	5.3053	0.3006	0.3122	0	0	0	0	0	0	0	0	0	0	0	0	0	0	0	0	0	0	0	1	0	1	0	0	0	0	0	0	0	0
163	15311	YqaJ-like viral recombinase	-	-	NT56_RS08800;-	false	true	2	2	0.308667	0.707885	0.597547	-0.91764	0.51051	0.223628	4.385	5.30264	0.3067	0.3355	0	0	0	0	0	0	0	1	0	0	0	0	0	0	0	0	0	0	0	0	0	0	0	0	0	0	0	0	0	0
164	17009	hypothetical protein	-	-	NT56_RS08805;-	false	true	2	2	0.308667	0.707885	0.597547	-0.91764	0.51051	0.223628	4.385	5.30264	0.3067	0.3355	0	0	0	0	0	0	0	1	0	0	0	0	0	0	0	0	0	0	0	0	0	0	0	0	0	0	0	0	0	0
165	15235	chitinase; lytic protein	-	-	Q009_RS27655;Q009_04063	false	true	23	18	0.315305	0.691499	0.808795	-0.170209	0.501269	0.0921615	5.15606	5.32626	0.313	0.4091	0	0	2	0	0	0	1	1	0	2	0	0	2	0	0	0	1	1	0	0	1	1	1	2	0	2	0	0	0	0
166	14147	hypothetical protein	-	-	NT54_RS06870;-	false	true	3	3	0.318834	0.695047	0.583119	-0.786735	0.496435	0.234243	4.526	5.31273	0.315	0.3069	0	0	0	0	0	1	0	0	0	0	0	0	0	0	0	0	0	0	0	0	0	0	0	1	0	0	0	0	0	0
167	2257	multidrug DMT transporter	-	-	NT49_RS00235;-	false	true	2	2	0.325617	0.691333	0.562822	-1.00552	0.487293	0.249629	4.3005	5.30602	0.328	0.3193	0	0	0	0	0	0	0	0	0	0	0	0	0	0	0	0	1	0	0	0	0	0	0	0	0	1	0	0	0	0
168	4355	DNA damage-inducible protein	-	-	PACI27_RS21680;PACI27_4164	false	true	2	2	0.325617	0.691333	0.588209	-0.94104	0.487293	0.230469	4.3625	5.30354	0.3195	0.3261	0	0	0	0	0	0	0	0	0	0	0	1	0	0	0	0	0	0	0	0	0	0	0	0	0	0	0	0	0	0
169	16634	hypothetical protein	-	-	PACI27_RS21820;-	false	true	2	2	0.325617	0.691333	0.588209	-0.94104	0.487293	0.230469	4.3625	5.30354	0.3195	0.3261	0	0	0	0	0	0	0	0	0	0	0	1	0	0	0	0	0	0	0	0	0	0	0	0	0	0	0	0	0	0
170	23790	hypothetical protein	-	-	PACI27_RS21835;-	false	true	2	2	0.325617	0.691333	0.588209	-0.94104	0.487293	0.230469	4.3625	5.30354	0.3195	0.3261	0	0	0	0	0	0	0	0	0	0	0	1	0	0	0	0	0	0	0	0	0	0	0	0	0	0	0	0	0	0
171	23834	hypothetical protein	-	-	NT80_RS03735;-	false	true	3	3	0.332975	0.681166	0.816973	-0.332177	0.477589	0.0877925	4.95433	5.28651	0.329	0.4274	0	0	1	0	0	0	0	0	0	0	0	0	0	0	0	0	0	1	0	0	0	0	0	0	0	0	0	0	0	0
172	2275	hypothetical protein	-	-	Q009_RS22310;Q009_02952	false	true	4	4	0.333867	0.678533	0.596171	-0.664729	0.476427	0.224629	4.65375	5.31848	0.3305	0.3118	0	0	0	0	0	0	0	0	0	0	0	0	1	0	0	0	0	0	0	0	0	1	0	1	0	0	0	0	0	0
173	2533	hypothetical protein	-	-	Q009_RS31195;Q009_04799	false	true	16	15	0.339413	0.667952	0.586994	-0.400746	0.469272	0.231366	4.9822	5.38295	0.3268	0.288	0	0	0	0	1	0	1	0	1	0	0	0	0	0	0	1	1	1	0	0	0	1	1	1	1	0	0	0	0	0
174	25284	hypothetical protein	-	-	NS96_RS14195;-	false	true	2	2	0.342935	0.674383	0.626581	-0.84588	0.464788	0.203022	4.454	5.29988	0.331	0.3464	0	0	0	0	0	0	1	0	0	0	0	0	0	0	0	0	0	0	0	0	0	0	0	0	0	0	0	0	0	0
175	1834	hypothetical protein	-	-	PABE177_RS12635;-	false	true	1	1	0.344657	0.679542	0.628769	-1.17698	0.462613	0.201509	4.113	5.28998	0.3642	0.366	0	0	0	0	0	0	0	0	0	0	0	0	0	0	0	0	0	0	0	1	0	0	0	0	0	0	0	0	0	0
176	19926	hypothetical protein	-	-	PABE177_RS12955;PABE177_2412	false	true	1	1	0.344657	0.679542	0.628769	-1.17698	0.462613	0.201509	4.113	5.28998	0.3642	0.366	0	0	0	0	0	0	0	0	0	0	0	0	0	0	0	0	0	0	0	1	0	0	0	0	0	0	0	0	0	0
177	26329	hypothetical protein	-	-	PABE177_RS05540;PABE177_1025	false	true	1	1	0.344657	0.679542	0.628769	-1.17698	0.462613	0.201509	4.113	5.28998	0.3642	0.366	0	0	0	0	0	0	0	0	0	0	0	0	0	0	0	0	0	0	0	1	0	0	0	0	0	0	0	0	0	0
178	27001	hypothetical protein	-	-	PABE177_RS22140;-	false	true	1	1	0.344657	0.679542	0.628769	-1.17698	0.462613	0.201509	4.113	5.28998	0.3642	0.366	0	0	0	0	0	0	0	0	0	0	0	0	0	0	0	0	0	0	0	1	0	0	0	0	0	0	0	0	0	0
179	22462	lipoprotein	-	-	Q009_RS22145;Q009_02909	false	true	29	22	0.345232	0.661568	0.657698	-0.299915	0.461889	0.181973	5.09432	5.39423	0.3403	0.3295	0	0	0	0	1	1	0	2	0	0	1	2	2	1	0	1	1	0	0	3	0	1	0	2	0	0	0	0	0	1
180	14714	hypothetical protein	-	-	NT47_RS25520;-	false	true	3	3	0.347357	0.667025	0.577694	-0.798054	0.459225	0.238302	4.51533	5.31339	0.343	0.304	0	0	0	0	0	0	0	0	0	0	0	0	0	0	1	0	0	0	0	1	0	0	0	0	0	0	0	0	0	0
181	2972	hypothetical protein	-	-	Q009_RS27550;Q009_04041	false	true	9	8	0.361267	0.648189	0.713321	-0.340625	0.442172	0.146715	4.97912	5.31975	0.3645	0.3754	0	0	2	0	0	0	0	0	0	1	0	0	0	0	0	0	0	0	0	1	0	1	0	0	0	1	0	0	0	0
182	20144	hypothetical protein	-	-	Q009_RS27555;Q009_04042	false	true	9	8	0.361267	0.648189	0.713321	-0.340625	0.442172	0.146715	4.97912	5.31975	0.3645	0.3754	0	0	2	0	0	0	0	0	0	1	0	0	0	0	0	0	0	0	0	1	0	1	0	0	0	1	0	0	0	0
183	24304	hypothetical protein	-	-	PABE177_RS33335;PABE177_6230	false	true	3	3	0.361962	0.652643	0.577863	-0.797701	0.441337	0.238175	4.51567	5.31337	0.357	0.3057	0	0	0	0	0	0	0	0	0	0	0	0	1	0	0	0	0	0	0	1	0	0	0	0	0	0	0	0	0	0
184	13622	methyl-accepting chemotaxis protein	PA14_RS24315;PA14_59640	-	PA14_RS24315;PA14_59640	false	true	35	34	0.37548	0.631794	0.523205	-0.448268	0.425413	0.281328	5.11218	5.56044	0.3646	0.2542	1	1	1	1	0	0	0	0	1	1	1	1	0	0	0	1	0	2	1	1	1	1	0	1	1	0	1	1	1	1
185	2800	DNA methyltransferase	-	-	NT80_RS00635;-	false	true	8	7	0.378919	0.631237	0.86758	-0.163498	0.421454	0.0616907	5.12586	5.28936	0.3751	0.4398	0	0	0	0	1	0	0	0	1	0	0	0	1	0	0	0	0	0	0	1	0	0	0	0	0	0	0	0	0	0
186	940	phage tail tape measure protein	-	-	NT88_RS14440;-	false	true	4	4	0.385183	0.627878	0.828692	-0.27175	0.414333	0.081607	5.0165	5.28825	0.3805	0.4342	0	0	0	0	0	1	0	0	0	0	0	0	1	0	0	0	0	0	0	0	0	0	0	0	0	0	0	0	0	0
187	10788	hypothetical protein	-	-	ACP77_RS05490;-	false	true	7	7	0.389159	0.621081	0.998445	0.00191111	0.409873	-0.000675767	5.269	5.26709	0.3805	0.4941	0	0	1	0	0	1	0	0	0	1	0	0	0	0	0	0	0	0	0	0	0	0	0	1	0	0	0	0	0	0
188	23504	hypothetical protein	PA14_RS19900;PA14_48990	PA0718;-	PA14_RS19900;PA14_48990	false	true	38	38	0.394275	0.613642	0.645944	-0.346323	0.404201	0.189805	5.17411	5.52043	0.3864	0.3183	1	1	0	1	0	1	1	1	0	1	1	1	1	1	1	1	1	0	0	1	0	0	1	1	1	1	0	1	1	1
189	960	hypothetical protein	-	-	Q009_RS38410;Q009_06293	false	true	1	1	0.394918	0.630492	0.755716	-0.757922	0.403493	0.121641	4.524	5.28192	0.4021	0.4067	0	0	0	0	0	0	0	0	0	0	0	0	0	0	0	0	0	0	0	0	0	1	0	0	0	0	0	0	0	0
190	3051	hypothetical protein	-	-	Q009_RS21210;Q009_02716	false	true	1	1	0.394918	0.630492	0.755716	-0.757922	0.403493	0.121641	4.524	5.28192	0.4021	0.4067	0	0	0	0	0	0	0	0	0	0	0	0	0	0	0	0	0	0	0	0	0	1	0	0	0	0	0	0	0	0
191	8920	hypothetical protein	-	-	Q009_RS0107390;-	false	true	1	1	0.394918	0.630492	0.755716	-0.757922	0.403493	0.121641	4.524	5.28192	0.4021	0.4067	0	0	0	0	0	0	0	0	0	0	0	0	0	0	0	0	0	0	0	0	0	1	0	0	0	0	0	0	0	0
192	9696	hypothetical protein	-	-	Q009_RS38405;Q009_06292	false	true	1	1	0.394918	0.630492	0.755716	-0.757922	0.403493	0.121641	4.524	5.28192	0.4021	0.4067	0	0	0	0	0	0	0	0	0	0	0	0	0	0	0	0	0	0	0	0	0	1	0	0	0	0	0	0	0	0
193	16997	hypothetical protein	-	-	Q009_RS21175;Q009_02706	false	true	2	1	0.394918	0.630492	0.755716	-0.757922	0.403493	0.121641	4.524	5.28192	0.4021	0.4067	0	0	0	0	0	0	0	0	0	0	0	0	0	0	0	0	0	0	0	0	0	2	0	0	0	0	0	0	0	0
194	18967	phage protein	-	-	Q009_RS21225;Q009_02720	false	true	2	1	0.394918	0.630492	0.755716	-0.757922	0.403493	0.121641	4.524	5.28192	0.4021	0.4067	0	0	0	0	0	0	0	0	0	0	0	0	0	0	0	0	0	0	0	0	0	2	0	0	0	0	0	0	0	0
195	19134	hypothetical protein	-	-	Q009_RS21215;Q009_02718	false	true	2	1	0.394918	0.630492	0.755716	-0.757922	0.403493	0.121641	4.524	5.28192	0.4021	0.4067	0	0	0	0	0	0	0	0	0	0	0	0	0	0	0	0	0	0	0	0	0	2	0	0	0	0	0	0	0	0
196	22773	hypothetical protein	-	-	Q009_RS21230;Q009_02721	false	true	2	1	0.394918	0.630492	0.755716	-0.757922	0.403493	0.121641	4.524	5.28192	0.4021	0.4067	0	0	0	0	0	0	0	0	0	0	0	0	0	0	0	0	0	0	0	0	0	2	0	0	0	0	0	0	0	0
197	22801	hypothetical protein	-	-	Q009_RS21240;Q009_02723	false	true	1	1	0.394918	0.630492	0.755716	-0.757922	0.403493	0.121641	4.524	5.28192	0.4021	0.4067	0	0	0	0	0	0	0	0	0	0	0	0	0	0	0	0	0	0	0	0	0	1	0	0	0	0	0	0	0	0
198	27722	hypothetical protein	-	-	Q009_RS0107895;-	false	true	1	1	0.394918	0.630492	0.755716	-0.757922	0.403493	0.121641	4.524	5.28192	0.4021	0.4067	0	0	0	0	0	0	0	0	0	0	0	0	0	0	0	0	0	0	0	0	0	1	0	0	0	0	0	0	0	0
199	14145	phage-like protein	-	-	NT88_RS14340;-	false	true	4	4	0.398375	0.614817	0.915755	0.132875	0.399708	-0.0382206	5.39	5.25713	0.3857	0.4445	0	0	1	0	0	1	0	0	0	0	0	0	0	0	0	0	0	0	0	0	0	0	0	0	0	0	0	0	0	0
200	19825	hypothetical protein	-	-	Q009_RS38395;Q009_06290	false	true	5	5	0.401942	0.610017	0.856199	-0.205728	0.395837	0.0674251	5.0814	5.28713	0.3935	0.4386	0	0	0	0	0	0	0	0	0	0	0	1	0	0	0	0	0	1	0	0	0	1	0	1	0	0	0	0	0	0
201	10118	endonuclease	-	-	ACP77_RS11205;-	false	true	11	11	0.402659	0.605988	0.850368	-0.154594	0.395063	0.0703929	5.14545	5.30005	0.3983	0.4298	0	0	0	0	0	0	1	1	0	0	0	0	1	0	0	0	1	0	0	1	0	0	1	1	0	0	0	0	0	1
202	10189	DNA recombination protein RecT	-	-	ACP77_RS11200;-	false	true	11	11	0.402659	0.605988	0.850368	-0.154594	0.395063	0.0703929	5.14545	5.30005	0.3983	0.4298	0	0	0	0	0	0	1	1	0	0	0	0	1	0	0	0	1	0	0	1	0	0	1	1	0	0	0	0	0	1
203	10397	hypothetical protein	-	-	ACP77_RS11300;-	false	true	10	10	0.403694	0.605271	0.918089	-0.0873429	0.393947	0.0371154	5.1968	5.28414	0.3986	0.4618	0	0	0	0	0	0	1	1	0	0	1	0	0	0	0	0	1	0	0	0	0	0	1	1	0	0	0	0	0	1
204	18612	hypothetical protein	-	-	ACP77_RS11355;-	false	true	6	6	0.403825	0.607228	0.891986	-0.142261	0.393807	0.0496421	5.1415	5.28376	0.4005	0.4569	0	0	0	0	0	0	0	0	0	0	0	1	1	0	0	0	0	0	0	1	0	0	0	1	0	0	0	0	0	1
205	26126	hypothetical protein	-	-	Q009_RS28420;Q009_04226	false	true	8	7	0.409866	0.600523	0.816605	-0.227384	0.387358	0.0879881	5.07057	5.29796	0.4082	0.4193	0	0	0	0	1	0	0	0	1	0	0	0	0	0	0	0	0	0	0	0	0	1	0	0	0	1	0	0	0	0
206	11750	hypothetical protein	-	-	PACIG1_RS05095;-	false	true	4	4	0.411684	0.601625	0.690655	-0.499521	0.385436	0.160739	4.80625	5.30577	0.4052	0.361	0	0	0	0	0	0	0	0	0	0	0	1	0	0	0	0	0	0	0	0	1	0	0	0	0	0	0	0	0	0
207	16739	small subunit (Nu1 homolog) of DNA packaging dimer	-	-	ACP77_RS05590;-	false	true	3	3	0.41455	0.600678	0.966006	0.0611837	0.382423	-0.0150201	5.325	5.26382	0.4152	0.4669	0	0	0	0	0	0	0	0	0	1	0	0	1	0	0	0	0	0	0	0	0	0	0	0	0	0	0	0	0	0
208	26705	hypothetical protein	-	-	NT47_RS08320;-	false	true	2	2	0.415223	0.603228	0.715172	-0.63476	0.381718	0.145589	4.657	5.29176	0.4049	0.402	0	0	0	0	0	0	0	0	0	0	0	0	0	1	0	0	0	0	0	0	0	0	0	0	0	0	0	0	0	0
209	14110	hypothetical protein	-	-	NS86_RS17105;-	false	true	1	1	0.420782	0.605082	0.789046	-0.651882	0.375943	0.102898	4.628	5.27988	0.4142	0.4322	0	0	0	0	0	0	0	0	0	0	0	0	0	0	0	0	0	0	0	0	0	0	1	0	0	0	0	0	0	0
210	24436	lipoprotein	-	-	NS86_RS04760;-	false	true	1	1	0.420782	0.605082	0.789046	-0.651882	0.375943	0.102898	4.628	5.27988	0.4142	0.4322	0	0	0	0	0	0	0	0	0	0	0	0	0	0	0	0	0	0	0	0	0	0	1	0	0	0	0	0	0	0
211	727	phage tail fiber protein	-	-	ACP77_RS11415;-	false	true	10	10	0.421773	0.587289	0.910793	0.0951524	0.374921	-0.0405802	5.3442	5.24905	0.4138	0.4537	0	0	0	0	0	1	0	1	0	0	0	1	1	0	0	0	0	0	0	1	0	0	0	1	0	0	0	0	0	1
212	20066	hypothetical protein	-	-	ACP77_RS11410;-	false	true	10	10	0.421773	0.587289	0.910793	0.0951524	0.374921	-0.0405802	5.3442	5.24905	0.4138	0.4537	0	0	0	0	0	1	0	1	0	0	0	1	1	0	0	0	0	0	0	1	0	0	0	1	0	0	0	0	0	1
213	23192	hypothetical protein	-	-	Q009_RS28880;Q009_04324	false	true	6	3	0.422214	0.593082	0.734234	-0.487116	0.374468	0.134165	4.80833	5.29545	0.4136	0.3894	0	0	0	0	0	0	0	0	0	0	0	0	0	0	0	0	0	1	0	0	0	4	0	0	0	0	0	0	0	0
214	6330	zonular occludens toxin	-	-	Q009_RS39725;Q009_06569	false	true	3	3	0.422214	0.593082	0.750465	-0.45634	0.374468	0.12467	4.83733	5.29367	0.4019	0.3882	0	0	0	0	0	0	0	0	0	0	0	0	0	0	0	0	0	0	0	0	1	1	0	0	0	0	0	0	0	0
215	11977	hypothetical protein	-	-	NT88_RS14320;-	false	true	3	3	0.422214	0.593082	0.962063	-0.0682857	0.374468	0.0167965	5.203	5.27129	0.4109	0.5006	0	0	0	0	0	1	0	0	0	0	0	0	0	0	0	0	0	0	0	0	0	0	0	1	0	0	0	0	0	0
216	14301	hypothetical protein	-	-	Q000_RS14530;Q000_01580	false	true	3	3	0.437628	0.577786	0.94283	-0.102952	0.358895	0.0255666	5.17033	5.27329	0.4341	0.4895	0	0	0	0	0	0	0	0	0	0	1	0	0	1	0	0	0	0	0	0	0	0	0	0	0	0	0	0	0	0
217	12932	hypothetical protein	-	-	NS12_RS00735;-	false	true	3	3	0.437628	0.577786	0.948519	-0.0926939	0.358895	0.0229542	5.18	5.27269	0.4316	0.4974	0	0	0	0	0	0	0	0	0	0	0	0	1	1	0	0	0	0	0	0	0	0	0	0	0	0	0	0	0	0
218	17780	phage protein, siphovirus Gp157 family	-	-	-	false	true	3	3	0.437628	0.577786	0.948519	-0.0926939	0.358895	0.0229542	5.18	5.27269	0.4316	0.4974	0	0	0	0	0	0	0	0	0	0	0	0	1	1	0	0	0	0	0	0	0	0	0	0	0	0	0	0	0	0
219	4781	replicative DNA helicase	PA14_RS24070;PA14_58990	-	PA14_RS24070;PA14_58990	false	true	34	31	0.440699	0.566648	0.697195	-0.26525	0.355858	0.156646	5.16023	5.42548	0.4319	0.3392	0	1	1	1	0	0	0	0	1	1	1	1	2	0	0	1	0	1	1	1	1	0	0	0	1	0	1	1	1	1
220	12970	hypothetical protein	PA14_RS24040;PA14_58920	-	PA14_RS24040;PA14_58920	false	true	33	31	0.440699	0.566648	0.697195	-0.26525	0.355858	0.156646	5.16023	5.42548	0.4319	0.3392	0	1	1	1	0	0	0	0	1	1	1	1	1	0	0	1	0	1	1	1	1	0	0	0	1	0	1	1	1	1
221	16215	integrase	PA14_RS24135;PA14_59140	-	PA14_RS24135;PA14_59140	false	true	33	31	0.440699	0.566648	0.697195	-0.26525	0.355858	0.156646	5.16023	5.42548	0.4319	0.3392	0	1	1	1	0	0	0	0	1	1	1	1	1	0	0	1	0	1	1	1	1	0	0	0	1	0	1	1	1	1
222	26539	hypothetical protein	PA14_RS24065;PA14_58980	-	PA14_RS24065;PA14_58980	false	true	34	31	0.440699	0.566648	0.697195	-0.26525	0.355858	0.156646	5.16023	5.42548	0.4319	0.3392	0	1	1	1	0	0	0	0	1	1	1	1	2	0	0	1	0	1	1	1	1	0	0	0	1	0	1	1	1	1
223	26515	hypothetical protein	-	-	Q002_RS0106430;-	false	true	7	7	0.441385	0.569173	0.722752	-0.347727	0.355182	0.141011	4.96643	5.31416	0.4358	0.3683	0	1	0	0	0	0	0	0	0	1	0	0	0	0	0	1	0	0	0	0	0	0	0	0	1	0	0	0	0	0
224	8536	hypothetical protein	-	-	NT56_RS22285;-	false	true	13	12	0.443866	0.564699	0.819062	-0.181692	0.352748	0.0866832	5.12758	5.30928	0.4325	0.4112	0	0	0	0	1	0	1	1	0	0	0	0	0	0	0	1	1	0	0	0	0	0	2	0	1	0	0	0	0	0
225	10732	hypothetical protein	-	-	NT56_RS22280;-	false	true	13	12	0.443866	0.564699	0.819062	-0.181692	0.352748	0.0866832	5.12758	5.30928	0.4325	0.4112	0	0	0	0	1	0	1	1	0	0	0	0	0	0	0	1	1	0	0	0	0	0	2	0	1	0	0	0	0	0
226	12812	hypothetical protein	-	-	NT56_RS27165;-	false	true	13	12	0.443866	0.564699	0.819062	-0.181692	0.352748	0.0866832	5.12758	5.30928	0.4325	0.4112	0	0	0	0	1	0	1	1	0	0	0	0	0	0	0	1	1	0	0	0	0	0	2	0	1	0	0	0	0	0
227	19977	hypothetical protein	-	-	NT56_RS30665;-	false	true	13	12	0.443866	0.564699	0.819062	-0.181692	0.352748	0.0866832	5.12758	5.30928	0.4325	0.4112	0	0	0	0	1	0	1	1	0	0	0	0	0	0	0	1	1	0	0	0	0	0	2	0	1	0	0	0	0	0
228	23160	hypothetical protein	-	-	NT56_RS24385;-	false	true	14	12	0.443866	0.564699	0.819062	-0.181692	0.352748	0.0866832	5.12758	5.30928	0.4325	0.4112	0	0	0	0	1	0	1	2	0	0	0	0	0	0	0	1	1	0	0	0	0	0	2	0	1	0	0	0	0	0
229	17844	hypothetical protein	-	-	Q012_RS38495;Q012_06363	false	true	7	7	0.44668	0.5639	0.803415	-0.244057	0.350003	0.0950599	5.05614	5.3002	0.4317	0.4074	0	0	0	0	0	0	0	0	0	0	1	0	1	0	0	0	0	0	0	1	0	0	0	1	0	0	0	0	0	1
230	7201	hypothetical protein	-	-	NT05_RS02625;-	false	true	1	1	0.446993	0.579218	0.850544	-0.459176	0.349699	0.0703031	4.817	5.27618	0.4394	0.4547	0	0	0	0	0	0	0	0	0	0	0	0	0	0	0	0	0	0	0	0	0	0	0	1	0	0	0	0	0	0
231	8638	phage replication protein	-	-	NT05_RS02570;-	false	true	1	1	0.446993	0.579218	0.850544	-0.459176	0.349699	0.0703031	4.817	5.27618	0.4394	0.4547	0	0	0	0	0	0	0	0	0	0	0	0	0	0	0	0	0	0	0	0	0	0	0	1	0	0	0	0	0	0
232	11146	hypothetical protein	-	-	NT05_RS31870;-	false	true	1	1	0.446993	0.579218	0.850544	-0.459176	0.349699	0.0703031	4.817	5.27618	0.4394	0.4547	0	0	0	0	0	0	0	0	0	0	0	0	0	0	0	0	0	0	0	0	0	0	0	1	0	0	0	0	0	0
233	15484	bacteriophage lambda NinG family protein	-	-	NT05_RS29405;-	false	true	1	1	0.446993	0.579218	0.850544	-0.459176	0.349699	0.0703031	4.817	5.27618	0.4394	0.4547	0	0	0	0	0	0	0	0	0	0	0	0	0	0	0	0	0	0	0	0	0	0	0	1	0	0	0	0	0	0
234	15699	hypothetical protein	-	-	NT05_RS30800;-	false	true	1	1	0.446993	0.579218	0.850544	-0.459176	0.349699	0.0703031	4.817	5.27618	0.4394	0.4547	0	0	0	0	0	0	0	0	0	0	0	0	0	0	0	0	0	0	0	0	0	0	0	1	0	0	0	0	0	0
235	15956	hypothetical protein	-	-	NT05_RS31910;-	false	true	1	1	0.446993	0.579218	0.850544	-0.459176	0.349699	0.0703031	4.817	5.27618	0.4394	0.4547	0	0	0	0	0	0	0	0	0	0	0	0	0	0	0	0	0	0	0	0	0	0	0	1	0	0	0	0	0	0
236	17536	hypothetical protein	-	-	NT05_RS30875;-	false	true	1	1	0.446993	0.579218	0.850544	-0.459176	0.349699	0.0703031	4.817	5.27618	0.4394	0.4547	0	0	0	0	0	0	0	0	0	0	0	0	0	0	0	0	0	0	0	0	0	0	0	1	0	0	0	0	0	0
237	17718	methyltransferase	-	-	NT05_RS30815;-	false	true	1	1	0.446993	0.579218	0.850544	-0.459176	0.349699	0.0703031	4.817	5.27618	0.4394	0.4547	0	0	0	0	0	0	0	0	0	0	0	0	0	0	0	0	0	0	0	0	0	0	0	1	0	0	0	0	0	0
238	20964	hypothetical protein	-	-	NT05_RS30795;-	false	true	1	1	0.446993	0.579218	0.850544	-0.459176	0.349699	0.0703031	4.817	5.27618	0.4394	0.4547	0	0	0	0	0	0	0	0	0	0	0	0	0	0	0	0	0	0	0	0	0	0	0	1	0	0	0	0	0	0
239	21864	crossover junction endodeoxyribonuclease RusA	-	-	NT05_RS02550;-	false	true	1	1	0.446993	0.579218	0.850544	-0.459176	0.349699	0.0703031	4.817	5.27618	0.4394	0.4547	0	0	0	0	0	0	0	0	0	0	0	0	0	0	0	0	0	0	0	0	0	0	0	1	0	0	0	0	0	0
240	22914	hypothetical protein	-	-	NT05_RS30805;-	false	true	1	1	0.446993	0.579218	0.850544	-0.459176	0.349699	0.0703031	4.817	5.27618	0.4394	0.4547	0	0	0	0	0	0	0	0	0	0	0	0	0	0	0	0	0	0	0	0	0	0	0	1	0	0	0	0	0	0
241	28473	hypothetical protein	-	-	NT05_RS31930;-	false	true	1	1	0.446993	0.579218	0.850544	-0.459176	0.349699	0.0703031	4.817	5.27618	0.4394	0.4547	0	0	0	0	0	0	0	0	0	0	0	0	0	0	0	0	0	0	0	0	0	0	0	1	0	0	0	0	0	0
242	7725	phage protein	-	-	Q009_RS22385;Q009_02968	false	true	7	6	0.448722	0.562587	0.867156	-0.175232	0.348022	0.0619027	5.11233	5.28757	0.4394	0.4394	0	0	0	0	0	0	0	0	0	0	0	2	0	0	0	0	0	1	0	0	0	1	0	1	0	0	0	0	0	0
243	23189	hypothetical protein	-	-	Q009_RS17715;Q009_01997	false	true	4	4	0.452165	0.561406	0.991505	-0.013375	0.344703	0.00370515	5.255	5.26837	0.4405	0.5103	0	0	0	0	0	0	0	1	0	0	0	0	0	0	0	0	0	0	0	0	0	1	0	0	0	1	0	0	0	0
244	10990	Clp protease	-	-	NT88_RS14375;-	false	true	2	2	0.452653	0.566136	0.938726	0.1338	0.344234	-0.0274611	5.396	5.2622	0.4361	0.4622	0	0	0	0	0	1	0	0	0	0	0	0	0	0	0	0	0	0	0	0	0	0	0	0	0	0	0	0	0	0
245	15309	Orf13	-	-	NT88_RS14410;-	false	true	2	2	0.452653	0.566136	0.938726	0.1338	0.344234	-0.0274611	5.396	5.2622	0.4361	0.4622	0	0	0	0	0	1	0	0	0	0	0	0	0	0	0	0	0	0	0	0	0	0	0	0	0	0	0	0	0	0
246	17994	hypothetical protein	-	-	NT88_RS14360;-	false	true	2	2	0.452653	0.566136	0.938726	0.1338	0.344234	-0.0274611	5.396	5.2622	0.4361	0.4622	0	0	0	0	0	1	0	0	0	0	0	0	0	0	0	0	0	0	0	0	0	0	0	0	0	0	0	0	0	0
247	21548	hypothetical protein	-	-	NT88_RS14400;-	false	true	2	2	0.452653	0.566136	0.938726	0.1338	0.344234	-0.0274611	5.396	5.2622	0.4361	0.4622	0	0	0	0	0	1	0	0	0	0	0	0	0	0	0	0	0	0	0	0	0	0	0	0	0	0	0	0	0	0
248	22264	holin	-	-	NT88_RS14345;-	false	true	2	2	0.452653	0.566136	0.938726	0.1338	0.344234	-0.0274611	5.396	5.2622	0.4361	0.4622	0	0	0	0	0	1	0	0	0	0	0	0	0	0	0	0	0	0	0	0	0	0	0	0	0	0	0	0	0	0
249	22352	hypothetical protein	-	-	NT88_RS14395;-	false	true	2	2	0.452653	0.566136	0.938726	0.1338	0.344234	-0.0274611	5.396	5.2622	0.4361	0.4622	0	0	0	0	0	1	0	0	0	0	0	0	0	0	0	0	0	0	0	0	0	0	0	0	0	0	0	0	0	0
250	23191	HNH endonuclease	-	-	NT88_RS14355;-	false	true	2	2	0.452653	0.566136	0.938726	0.1338	0.344234	-0.0274611	5.396	5.2622	0.4361	0.4622	0	0	0	0	0	1	0	0	0	0	0	0	0	0	0	0	0	0	0	0	0	0	0	0	0	0	0	0	0	0
251	27427	hypothetical protein	-	-	NT80_RS30790;-	false	true	2	2	0.452653	0.566136	0.87976	0.26328	0.344234	-0.0556356	5.5205	5.25722	0.4322	0.4323	0	0	1	0	0	0	0	0	0	0	0	0	0	0	0	0	0	0	0	0	0	0	0	0	0	0	0	0	0	0
252	725	DNA primase	-	-	NS86_RS20195;-	false	true	3	3	0.453137	0.562372	0.921296	0.141837	0.343771	-0.0356008	5.401	5.25916	0.4406	0.4501	0	0	0	0	1	0	0	0	0	0	0	0	0	0	0	0	0	0	0	0	0	0	1	0	0	0	0	0	0	0
253	11737	hypothetical protein	-	-	NS86_RS20260;-	false	true	3	3	0.453137	0.562372	0.921296	0.141837	0.343771	-0.0356008	5.401	5.25916	0.4406	0.4501	0	0	0	0	1	0	0	0	0	0	0	0	0	0	0	0	0	0	0	0	0	0	1	0	0	0	0	0	0	0
254	12518	cell division protein FtsK	-	-	ACP77_RS11190;-	false	true	10	10	0.458393	0.550808	0.966924	-0.035219	0.338762	0.0146077	5.2389	5.27412	0.4443	0.4859	0	0	0	0	0	0	1	0	0	0	1	0	1	0	0	0	0	0	0	1	0	0	1	1	0	0	0	0	0	1
255	22004	hypothetical protein	-	-	Y880_RS27915;-	false	true	10	10	0.472234	0.536998	0.925141	0.0798	0.325843	-0.0337919	5.3318	5.252	0.4686	0.452	0	1	0	0	0	0	0	0	0	1	1	0	0	0	1	0	0	0	0	0	0	0	0	1	1	0	0	0	0	0
256	249	hypothetical protein	-	-	NT56_RS22290;-	false	true	11	11	0.473204	0.535708	0.883916	-0.119659	0.324952	0.0535889	5.173	5.29266	0.4655	0.4504	0	0	0	0	1	0	1	1	0	0	0	0	0	0	0	1	1	0	0	0	0	0	0	0	1	0	0	0	0	0
257	14023	hypothetical protein	-	-	NS66_RS20490;-	false	true	1	1	0.473438	0.553007	0.922567	-0.236902	0.324737	0.035002	5.035	5.2719	0.463	0.4781	0	0	0	0	0	0	0	0	0	0	0	0	0	0	0	0	0	0	0	0	0	0	0	0	1	0	0	0	0	0
258	12006	P-type conjugative transfer protein TrbJ	-	-	P998_RS09170;P998_00523	false	true	2	2	0.490509	0.528451	0.813911	-0.4096	0.309353	0.0894229	4.8735	5.2831	0.4719	0.444	0	0	0	0	0	0	0	0	0	0	0	0	0	0	0	0	0	0	1	0	0	0	0	0	0	0	0	0	0	0
259	17922	hypothetical protein	-	-	ACP77_RS11405;-	false	true	12	11	0.491062	0.517872	0.824045	0.182195	0.308864	-0.0840489	5.411	5.2288	0.4809	0.4108	0	0	0	0	0	1	0	1	0	0	0	1	2	0	0	0	0	0	0	1	0	0	0	1	0	0	0	0	0	1
260	7292	integrase	-	-	ACP77_RS05405;-	false	true	4	4	0.49315	0.520541	0.624037	0.614958	0.307021	-0.20479	5.835	5.22004	0.48	0.3046	0	0	1	0	0	1	0	0	0	0	0	0	0	0	0	0	0	0	0	0	0	0	0	0	0	0	0	0	0	0
261	12524	hypothetical protein	-	-	NQ73_RS03890;-	false	true	1	1	0.5	0.526562	0.937531	-0.19102	0.30103	0.0280144	5.08	5.27102	0.4854	0.4917	0	0	0	0	0	0	0	0	0	0	0	0	0	0	0	0	0	0	0	0	0	0	0	0	0	1	0	0	0	0
262	13053	hypothetical protein	-	-	Q009_RS0107065;-	false	true	6	5	0.5	0.512381	0.992339	0.0109021	0.30103	-0.00333984	5.2772	5.2663	0.4872	0.4867	0	0	0	0	0	0	0	0	0	0	0	0	0	0	0	0	0	1	0	1	0	1	0	2	0	0	0	0	0	0
263	22173	hypothetical protein	-	-	P998_RS35075;P998_05798	false	true	2	2	0.509491	0.509491	0.863665	-0.29884	-0.292864	0.0636546	4.98	5.27884	0.4944	0.4585	0	0	0	0	0	0	0	0	0	0	0	0	0	0	0	0	0	0	0	1	0	0	0	0	0	0	0	0	0	0
264	23002	hypothetical protein	-	-	Q009_RS39730;Q009_06570	false	true	2	2	0.509491	0.509491	0.900215	-0.21824	-0.292864	0.0456538	5.0575	5.27574	0.4943	0.4792	0	0	0	0	0	0	0	0	0	0	0	0	0	0	0	0	0	0	0	0	0	1	0	0	0	0	0	0	0	0
265	27425	hypothetical protein	-	-	Q009_RS39735;Q009_06572	false	true	2	2	0.509491	0.509491	0.900215	-0.21824	-0.292864	0.0456538	5.0575	5.27574	0.4943	0.4792	0	0	0	0	0	0	0	0	0	0	0	0	0	0	0	0	0	0	0	0	0	1	0	0	0	0	0	0	0	0
266	6163	integrase	-	-	NS33_RS27405;-	false	true	2	2	0.509491	0.509491	0.755849	0.54096	-0.292864	-0.121565	5.7875	5.24654	0.4932	0.3733	0	0	0	0	1	0	0	0	0	0	0	0	0	0	0	0	0	0	0	0	0	0	0	0	0	0	0	0	0	0
267	16734	phosphohydrolase	-	-	NS33_RS27380;-	false	true	2	2	0.509491	0.509491	0.755849	0.54096	-0.292864	-0.121565	5.7875	5.24654	0.4932	0.3733	0	0	0	0	1	0	0	0	0	0	0	0	0	0	0	0	0	0	0	0	0	0	0	0	0	0	0	0	0	0
268	22987	hypothetical protein	-	-	Q000_RS14540;Q000_01582	false	true	8	8	0.515174	0.494941	0.966371	-0.0391136	-0.305447	0.0148559	5.23425	5.27336	0.4857	0.4916	0	0	1	0	0	0	0	0	0	0	1	0	1	1	0	0	0	0	0	0	0	0	0	0	0	0	0	0	0	0
269	9141	polyhydroxyalkanoate synthesis protein PhaF	PA14_RS27285;PA14_66875	PA5060;-	PA14_RS27285;PA14_66875	false	true	48	48	0.520541	0.49315	0.991293	-0.0137083	-0.307021	0.00379789	5.26629	5.28	0.4802	0.4822	1	1	0	1	1	1	1	1	1	1	1	1	1	1	1	1	1	1	1	0	1	1	1	1	1	1	1	1	1	1
270	13948	hypothetical protein	-	-	NT49_RS00470;-	false	true	2	2	0.528451	0.490509	0.816929	-0.40284	-0.309353	0.0878155	4.88	5.28284	0.4669	0.4499	0	0	0	0	0	0	0	0	0	0	0	0	0	0	0	0	1	0	0	0	0	0	0	0	0	0	0	0	0	0
271	18200	hypothetical protein	-	-	NT49_RS00475;-	false	true	2	2	0.528451	0.490509	0.816929	-0.40284	-0.309353	0.0878155	4.88	5.28284	0.4669	0.4499	0	0	0	0	0	0	0	0	0	0	0	0	0	0	0	0	1	0	0	0	0	0	0	0	0	0	0	0	0	0
272	26131	hypothetical protein	-	-	Q009_RS27730;Q009_04082	false	true	9	9	0.519292	0.490351	0.893334	0.11863	-0.309493	-0.048986	5.36544	5.24681	0.4846	0.4444	0	0	1	0	0	0	0	0	0	0	0	0	0	0	0	0	0	1	0	1	0	1	0	1	0	1	0	0	0	0
273	980	tail length tape measure protein	-	-	ACP77_RS05645;-	false	true	8	8	0.520228	0.489883	0.831594	0.19725	-0.309908	-0.0800887	5.43425	5.237	0.48	0.4054	0	0	1	0	0	0	0	0	0	1	0	0	1	0	0	0	0	0	0	1	0	0	0	0	0	0	0	0	0	0
274	4508	type IV B pilus protein	PA14_RS24220;PA14_59350	-	PA14_RS24220;PA14_59350	false	true	33	32	0.518753	0.488746	0.781391	-0.190862	-0.310917	0.107132	5.19394	5.3848	0.4883	0.3811	0	1	1	1	0	0	0	0	1	1	1	1	1	0	0	1	0	1	1	1	1	0	0	0	1	0	1	1	1	1
275	7038	pilus biosynthesis protein PilL	PA14_RS24180;PA14_59240	-	PA14_RS24180;PA14_59240	false	true	32	32	0.518753	0.488746	0.781391	-0.190862	-0.310917	0.107132	5.19394	5.3848	0.4883	0.3811	0	1	1	1	0	0	0	0	1	1	1	1	1	0	0	1	0	1	1	1	1	0	0	0	1	0	1	1	1	1
276	16293	hypothetical protein	PA14_RS24230;PA14_59380	-	PA14_RS24230;PA14_59380	false	true	34	32	0.518753	0.488746	0.781391	-0.190862	-0.310917	0.107132	5.19394	5.3848	0.4883	0.3811	0	1	1	1	0	0	0	0	1	1	1	1	1	0	0	1	0	1	1	1	1	0	0	0	1	0	1	1	1	1
277	7045	hypothetical protein	-	-	NS12_RS19880;-	false	true	3	3	0.531282	0.484347	0.913082	0.156694	-0.314844	-0.0394901	5.415	5.25831	0.4704	0.4449	0	0	0	0	0	0	0	0	0	0	0	0	0	1	0	0	0	0	1	0	0	0	0	0	0	0	0	0	0	0
278	13982	hypothetical protein	-	-	Q012_RS0107400;-	false	true	7	6	0.539926	0.471458	0.986503	-0.0177246	-0.326557	0.0059017	5.25167	5.26939	0.4685	0.4979	0	0	0	0	0	0	0	1	0	0	0	0	0	0	0	0	0	0	0	2	0	0	1	0	0	0	0	0	0	1
279	24899	hypothetical protein	-	-	Q009_RS22285;Q009_02946	false	true	4	3	0.546863	0.468718	0.811819	0.341701	-0.329089	-0.0905407	5.58933	5.24763	0.4599	0.3997	0	0	0	0	0	0	0	0	0	0	0	1	0	0	0	0	0	0	0	0	0	2	0	0	0	0	0	0	0	0
280	1989	DNA topoisomerase I	PA14_RS24155;PA14_59180	-	PA14_RS24155;PA14_59180	false	true	31	30	0.540571	0.466787	0.884565	-0.0983576	-0.330881	0.0532701	5.22573	5.32409	0.4618	0.4359	0	1	1	1	0	0	0	0	1	1	1	1	0	0	0	1	0	1	1	1	1	0	0	0	1	0	1	1	1	1
281	13092	integrating conjugative element protein	PA14_RS24130;PA14_59130	-	PA14_RS24130;PA14_59130	false	true	31	30	0.540571	0.466787	0.884565	-0.0983576	-0.330881	0.0532701	5.22573	5.32409	0.4618	0.4359	0	1	1	1	0	0	0	0	1	1	1	1	0	0	0	1	0	1	1	1	1	0	0	0	1	0	1	1	1	1
282	1383	hypothetical protein	-	-	Q009_RS28720;Q009_04288	false	true	17	13	0.542076	0.466317	0.879084	0.11759	-0.331319	-0.0559698	5.35554	5.23795	0.4594	0.434	0	0	1	0	0	0	0	0	0	0	0	1	1	0	0	0	0	1	0	1	1	4	0	0	0	0	0	0	0	0
283	2768	hypothetical protein	-	-	Q009_RS28740;Q009_04292	false	true	17	13	0.542076	0.466317	0.879084	0.11759	-0.331319	-0.0559698	5.35554	5.23795	0.4594	0.434	0	0	1	0	0	0	0	0	0	0	0	1	1	0	0	0	0	1	0	1	1	4	0	0	0	0	0	0	0	0
284	11319	hypothetical protein	-	-	Q009_RS28735;Q009_04291	false	true	18	13	0.542076	0.466317	0.879084	0.11759	-0.331319	-0.0559698	5.35554	5.23795	0.4594	0.434	0	0	1	0	0	0	0	0	0	0	0	1	1	0	0	0	0	1	0	2	1	4	0	0	0	0	0	0	0	0
285	25875	hypothetical protein	-	-	Q009_RS28730;Q009_04290	false	true	18	13	0.542076	0.466317	0.879084	0.11759	-0.331319	-0.0559698	5.35554	5.23795	0.4594	0.434	0	0	1	0	0	0	0	0	0	0	0	1	1	0	0	0	0	1	0	2	1	4	0	0	0	0	0	0	0	0
286	21237	hypothetical protein	-	-	Q009_RS22280;Q009_02945	false	true	2	2	0.566136	0.452653	0.983719	0.03552	-0.344234	-0.00712888	5.3015	5.26598	0.4406	0.4815	0	0	0	0	0	0	0	0	0	0	0	0	0	0	0	0	0	0	0	0	0	1	0	0	0	0	0	0	0	0
287	28345	hypothetical protein	-	-	Q009_RS28770;Q009_04298	false	true	5	2	0.566136	0.452653	0.983719	0.03552	-0.344234	-0.00712888	5.3015	5.26598	0.4406	0.4815	0	0	0	0	0	0	0	0	0	0	0	0	0	0	0	0	0	0	0	0	0	4	0	0	0	0	0	0	0	0
288	1748	helicase	PA14_RS24165;PA14_59210	-	PA14_RS24165;PA14_59210	false	true	31	30	0.555242	0.452086	0.917346	-0.0703091	-0.344779	0.0374666	5.2376	5.30791	0.4508	0.45	0	1	1	1	0	0	0	0	1	1	0	1	1	0	0	1	0	1	1	1	1	0	0	0	1	0	1	1	1	1
289	13468	hypothetical protein	-	-	Q000_RS19770;Q000_02656	false	true	12	10	0.569122	0.440019	0.875065	-0.133524	-0.356529	0.0579598	5.1595	5.29302	0.4281	0.4471	0	0	1	0	0	0	0	0	0	0	1	0	0	0	0	0	1	0	0	1	0	0	0	0	0	1	0	0	0	0
290	27264	hypothetical protein	-	-	ACP77_RS11215;-	false	true	10	10	0.569122	0.440019	0.857046	0.152971	-0.356529	-0.0669959	5.3909	5.23793	0.4381	0.4268	0	0	0	0	0	0	1	0	0	0	0	0	1	0	0	0	1	0	0	1	0	0	1	1	0	0	0	0	0	1
291	18486	hypothetical protein	-	-	Q000_RS20000;Q000_02710	false	true	5	4	0.574905	0.438594	0.645624	0.577042	-0.357937	-0.19002	5.8	5.22296	0.439	0.3217	0	0	0	0	1	0	0	0	0	0	1	0	0	0	0	0	0	0	0	0	0	0	0	0	0	0	0	0	0	0
292	2197	integrase	-	-	ACP77_RS15005;-	false	true	8	8	0.575431	0.434529	0.899229	0.117477	-0.361981	-0.0461296	5.36675	5.24927	0.4205	0.4328	1	0	0	0	0	0	0	0	0	0	0	0	0	0	0	0	0	1	0	0	0	0	0	0	0	1	0	1	0	1
293	8507	hypothetical protein	-	-	NT56_RS24475;-	false	true	9	9	0.576719	0.432773	0.880017	0.133545	-0.36374	-0.0555091	5.37778	5.24423	0.4173	0.4279	0	0	0	0	0	0	1	1	0	0	0	0	0	0	0	0	1	0	0	1	0	0	0	1	0	0	0	0	0	0
294	16150	hypothetical protein	-	-	ACP77_RS05460;-	false	true	8	8	0.580393	0.429543	0.603511	0.481182	-0.366993	-0.219314	5.6745	5.19332	0.4274	0.2984	0	0	1	0	0	1	0	0	0	1	0	0	0	0	0	0	0	0	0	0	0	0	0	1	0	0	0	0	0	0
295	20553	LuxR family transcriptional regulator	-	-	ACP77_RS05485;-	false	true	8	8	0.580393	0.429543	0.603511	0.481182	-0.366993	-0.219314	5.6745	5.19332	0.4274	0.2984	0	0	1	0	0	1	0	0	0	1	0	0	0	0	0	0	0	0	0	0	0	0	0	1	0	0	0	0	0	0
296	23417	hypothetical protein	-	-	ACP77_RS05470;-	false	true	8	8	0.580393	0.429543	0.603511	0.481182	-0.366993	-0.219314	5.6745	5.19332	0.4274	0.2984	0	0	1	0	0	1	0	0	0	1	0	0	0	0	0	0	0	0	0	0	0	0	0	1	0	0	0	0	0	0
297	23539	hypothetical protein	-	-	ACP77_RS05555;-	false	true	8	8	0.580393	0.429543	0.603511	0.481182	-0.366993	-0.219314	5.6745	5.19332	0.4274	0.2984	0	0	1	0	0	1	0	0	0	1	0	0	0	0	0	0	0	0	0	0	0	0	0	1	0	0	0	0	0	0
298	25473	hypothetical protein	-	-	ACP77_RS05480;-	false	true	8	8	0.580393	0.429543	0.603511	0.481182	-0.366993	-0.219314	5.6745	5.19332	0.4274	0.2984	0	0	1	0	0	1	0	0	0	1	0	0	0	0	0	0	0	0	0	0	0	0	0	1	0	0	0	0	0	0
299	14154	hypothetical protein	-	-	Q000_RS0106145;-	false	true	6	6	0.585045	0.426154	0.796177	0.270536	-0.370434	-0.0989902	5.50667	5.23613	0.4212	0.3941	0	0	0	0	0	1	0	0	0	0	1	0	0	0	0	0	0	0	0	0	0	0	1	0	0	0	0	0	0	0
300	1540	DNA methyltransferase	-	-	Q000_RS19990;Q000_02708	false	true	6	6	0.585045	0.426154	0.794789	0.27242	-0.370434	-0.0997484	5.50833	5.23591	0.4175	0.3849	0	0	0	0	0	0	0	1	0	0	1	0	0	0	0	0	1	0	0	0	0	0	0	0	0	0	0	0	0	0
301	7800	hypothetical protein	-	-	Q000_RS19915;Q000_02687	false	true	2	2	0.603228	0.415223	0.744503	0.56696	-0.381718	-0.128134	5.8125	5.24554	0.3994	0.3705	0	0	0	0	0	0	0	0	0	0	1	0	0	0	0	0	0	0	0	0	0	0	0	0	0	0	0	0	0	0
302	10733	hypothetical protein	-	-	Q000_RS19860;Q000_02675	false	true	2	2	0.603228	0.415223	0.744503	0.56696	-0.381718	-0.128134	5.8125	5.24554	0.3994	0.3705	0	0	0	0	0	0	0	0	0	0	1	0	0	0	0	0	0	0	0	0	0	0	0	0	0	0	0	0	0	0
303	15544	DNA polymerase III subunit epsilon	-	-	Q000_RS19965;Q000_02702	false	true	2	2	0.603228	0.415223	0.744503	0.56696	-0.381718	-0.128134	5.8125	5.24554	0.3994	0.3705	0	0	0	0	0	0	0	0	0	0	1	0	0	0	0	0	0	0	0	0	0	0	0	0	0	0	0	0	0	0
304	16366	hypothetical protein	-	-	Q000_RS19905;Q000_02685	false	true	2	2	0.603228	0.415223	0.744503	0.56696	-0.381718	-0.128134	5.8125	5.24554	0.3994	0.3705	0	0	0	0	0	0	0	0	0	0	1	0	0	0	0	0	0	0	0	0	0	0	0	0	0	0	0	0	0	0
305	11090	antirepressor	-	-	ACP77_RS13855;-	false	true	22	21	0.595783	0.411458	0.941035	0.0504608	-0.385675	-0.0263942	5.29743	5.24697	0.4025	0.4643	0	1	0	0	0	0	0	0	1	1	1	0	1	0	0	1	0	1	1	0	1	0	0	0	1	0	1	0	0	1
306	16764	glycoside hydrolase	-	-	Q009_RS17695;Q009_01993	false	true	16	13	0.600095	0.40809	0.987456	-0.0121538	-0.389244	0.00548222	5.25823	5.27038	0.4011	0.4973	0	0	0	0	0	0	0	1	0	0	0	0	1	0	0	1	1	0	0	1	0	1	0	0	1	1	0	0	0	0
307	1317	conjugal transfer protein TraC	-	-	Q009_RS17740;Q009_02004	false	true	10	10	0.605271	0.403694	0.952287	-0.050819	-0.393947	0.021232	5.2263	5.27712	0.3985	0.4827	0	0	0	0	0	0	0	1	0	0	0	0	0	0	0	1	1	0	0	0	0	1	0	0	1	1	0	0	0	0
308	16543	hypothetical protein	-	-	Q009_RS17730;Q009_02002	false	true	10	10	0.605271	0.403694	0.952287	-0.050819	-0.393947	0.021232	5.2263	5.27712	0.3985	0.4827	0	0	0	0	0	0	0	1	0	0	0	0	0	0	0	1	1	0	0	0	0	1	0	0	1	1	0	0	0	0
309	16740	hypothetical protein	-	-	ACP77_RS05665;-	false	true	7	7	0.610841	0.399477	0.493168	0.670483	-0.398508	-0.307005	5.84757	5.17709	0.3919	0.2447	0	0	1	0	0	0	0	0	0	1	0	0	1	0	0	0	0	0	0	0	0	0	0	0	0	1	0	0	0	0
310	13946	hypothetical protein	-	-	PACI27_RS21630;PACI27_4156	false	true	4	4	0.614817	0.398375	0.786039	0.340875	-0.399708	-0.104556	5.582	5.24113	0.3941	0.3852	0	0	0	0	0	0	0	0	0	0	0	1	0	0	0	0	0	0	0	0	0	0	0	1	0	0	0	0	0	0
311	16426	terminase	-	-	ACP77_RS11315;-	false	true	4	4	0.614817	0.398375	0.693169	0.49525	-0.399708	-0.159161	5.7245	5.22925	0.4001	0.3486	0	0	0	0	0	0	0	0	0	0	0	0	1	0	0	0	0	0	0	1	0	0	0	0	0	0	0	0	0	1
312	24524	hypothetical protein	-	-	ACP77_RS15680;-	false	true	22	22	0.609429	0.397698	0.646033	0.310848	-0.400446	-0.189745	5.44668	5.13583	0.389	0.3206	0	1	0	0	0	1	0	0	0	1	1	1	1	1	1	0	0	0	0	1	0	0	1	1	1	0	0	0	0	1
313	23973	hypothetical protein	-	-	ACP77_RS05500;-	false	true	3	2	0.621452	0.396772	0.508886	1.14728	-0.40146	-0.293379	6.3705	5.22322	0.3826	0.2502	0	0	0	0	0	0	0	1	0	0	0	0	0	0	0	0	0	0	0	0	0	0	0	0	0	0	0	0	0	0
314	16478	hypothetical protein	-	-	Q009_RS27665;Q009_04065	false	true	11	9	0.614191	0.395092	0.781834	0.244935	-0.403302	-0.106885	5.46989	5.22495	0.3862	0.3855	0	0	0	0	0	0	0	0	0	0	0	0	2	0	0	0	0	1	0	2	0	1	0	1	0	1	0	0	0	0
315	13733	hypothetical protein	-	-	PACI27_RS21740;PACI27_4174	false	true	1	1	0.630492	0.394918	0.892292	0.33	-0.403493	-0.0494929	5.591	5.261	0.3994	0.4025	0	0	0	0	0	0	0	0	0	0	0	0	0	0	0	0	0	0	0	0	0	0	0	0	0	0	0	0	0	0
316	25478	hypothetical protein	-	-	PACI27_RS31815;-	false	true	1	1	0.630492	0.394918	0.892292	0.33	-0.403493	-0.0494929	5.591	5.261	0.3994	0.4025	0	0	0	0	0	0	0	0	0	0	0	0	0	0	0	0	0	0	0	0	0	0	0	0	0	0	0	0	0	0
317	26550	hypothetical protein	-	-	PACI27_RS21640;-	false	true	1	1	0.630492	0.394918	0.892292	0.33	-0.403493	-0.0494929	5.591	5.261	0.3994	0.4025	0	0	0	0	0	0	0	0	0	0	0	0	0	0	0	0	0	0	0	0	0	0	0	0	0	0	0	0	0	0
318	5371	DNA polymerase V subunit UmuC	-	-	PA103_RS29625;PA103_5726	false	true	16	16	0.61313	0.39448	0.957756	-0.0384167	-0.403975	0.0187452	5.24075	5.27917	0.3933	0.4752	0	1	1	0	0	0	0	0	0	0	0	0	1	0	0	0	0	1	1	0	0	0	0	1	1	0	1	1	0	0
319	27554	hypothetical protein	-	-	PACI27_RS21825;-	false	true	4	3	0.623229	0.391763	0.768702	0.422	-0.406977	-0.114242	5.665	5.243	0.3833	0.3776	0	0	0	0	0	0	0	0	0	0	0	2	0	0	0	0	0	0	0	0	0	0	0	0	0	0	0	0	0	0
320	12930	phage recombination protein Bet	-	-	Q009_RS22390;Q009_02969	false	true	3	3	0.623229	0.391763	0.743003	0.470463	-0.406977	-0.129009	5.71067	5.2402	0.3828	0.3634	0	0	0	0	0	0	0	0	0	0	0	0	0	0	0	0	0	1	0	0	0	1	0	0	0	0	0	0	0	0
321	15086	exonuclease	-	-	Q009_RS22395;Q009_02970	false	true	3	3	0.623229	0.391763	0.743003	0.470463	-0.406977	-0.129009	5.71067	5.2402	0.3828	0.3634	0	0	0	0	0	0	0	0	0	0	0	0	0	0	0	0	0	1	0	0	0	1	0	0	0	0	0	0	0	0
322	21761	hypothetical protein	-	-	Q009_RS21100;Q009_02699	false	true	3	3	0.623229	0.391763	0.739647	0.47683	-0.406977	-0.130976	5.71667	5.23984	0.3908	0.3682	0	0	0	0	0	0	0	0	0	0	0	0	0	0	0	0	0	0	0	1	0	1	0	0	0	0	0	0	0	0
323	1819	terminase	-	-	ACP77_RS05595;-	false	true	8	8	0.619569	0.390128	0.535674	0.573511	-0.408793	-0.2711	5.75263	5.17911	0.3828	0.2623	0	0	1	0	0	0	0	0	0	1	0	0	1	0	0	0	0	0	0	1	0	0	0	0	0	0	0	0	0	0
324	247	Lambda phage tail fiber protein J	-	-	NT80_RS04360;-	false	true	4	4	0.627878	0.385183	0.756814	0.388813	-0.414333	-0.121011	5.62625	5.23744	0.3781	0.3705	0	0	0	0	0	0	0	0	0	0	0	0	0	0	0	0	0	1	0	0	0	0	0	1	0	1	0	0	0	0
325	11303	transposase	-	-	NT80_RS01425;-	false	true	7	6	0.629068	0.381805	0.686994	0.421826	-0.418158	-0.163047	5.6405	5.21867	0.3797	0.3432	0	0	0	0	0	0	0	0	0	0	0	0	2	0	0	0	0	1	0	1	0	0	0	1	0	0	0	0	0	0
326	8443	integrase	-	-	ACP77_RS31615;-	false	true	21	21	0.627928	0.379148	0.606293	0.351118	-0.421191	-0.217317	5.47667	5.12555	0.3769	0.2998	0	1	0	0	0	1	0	0	0	1	1	1	1	1	1	0	0	0	0	1	0	0	1	0	1	0	0	0	0	1
327	27009	hypothetical protein	-	-	NT41_RS30460;-	false	true	2	2	0.639409	0.378548	0.905039	0.20764	-0.421879	-0.0433329	5.467	5.25936	0.3742	0.4547	0	0	0	0	0	0	0	0	0	0	0	0	0	0	0	0	0	0	0	0	0	0	0	1	0	0	0	0	0	0
328	26280	hypothetical protein	-	-	NT80_RS29995;-	false	true	2	2	0.639409	0.378548	0.665391	0.75208	-0.421879	-0.176923	5.9905	5.23842	0.3657	0.3199	0	0	0	0	0	0	0	0	0	0	0	0	1	0	0	0	0	0	0	0	0	0	0	0	0	0	0	0	0	0
329	15153	hypothetical protein	-	-	NR63_RS19105;-	false	true	2	2	0.639409	0.378548	0.609128	0.88884	-0.421879	-0.215291	6.122	5.23316	0.3688	0.2924	0	0	0	0	0	0	0	0	0	0	0	1	0	0	0	0	0	0	0	0	0	0	0	0	0	0	0	0	0	0
330	19911	hypothetical protein	-	-	NR63_RS19015;-	false	true	2	2	0.639409	0.378548	0.609128	0.88884	-0.421879	-0.215291	6.122	5.23316	0.3688	0.2924	0	0	0	0	0	0	0	0	0	0	0	1	0	0	0	0	0	0	0	0	0	0	0	0	0	0	0	0	0	0
331	4580	hypothetical protein	-	-	ACP77_RS11330;-	false	true	7	7	0.636282	0.37383	0.602771	0.509695	-0.427326	-0.219848	5.70843	5.19873	0.3687	0.2978	0	0	0	0	0	0	0	0	0	0	0	1	1	0	0	0	0	0	0	1	0	0	0	1	0	0	0	0	0	1
332	5382	hypothetical protein	-	-	ACP77_RS11340;-	false	true	7	7	0.636282	0.37383	0.602771	0.509695	-0.427326	-0.219848	5.70843	5.19873	0.3687	0.2978	0	0	0	0	0	0	0	0	0	0	0	1	1	0	0	0	0	0	0	1	0	0	0	1	0	0	0	0	0	1
333	7394	hypothetical protein	-	-	ACP77_RS11350;-	false	true	7	7	0.636282	0.37383	0.602771	0.509695	-0.427326	-0.219848	5.70843	5.19873	0.3687	0.2978	0	0	0	0	0	0	0	0	0	0	0	1	1	0	0	0	0	0	0	1	0	0	0	1	0	0	0	0	0	1
334	8732	Ig domain-containing protein	-	-	ACP77_RS11385;-	false	true	7	7	0.636282	0.37383	0.602771	0.509695	-0.427326	-0.219848	5.70843	5.19873	0.3687	0.2978	0	0	0	0	0	0	0	0	0	0	0	1	1	0	0	0	0	0	0	1	0	0	0	1	0	0	0	0	0	1
335	9715	SPP1 gp7 family phage head morphogenesis protein	-	-	ACP77_RS11335;-	false	true	7	7	0.636282	0.37383	0.602771	0.509695	-0.427326	-0.219848	5.70843	5.19873	0.3687	0.2978	0	0	0	0	0	0	0	0	0	0	0	1	1	0	0	0	0	0	0	1	0	0	0	1	0	0	0	0	0	1
336	15287	glycoprotein	-	-	ACP77_RS11390;-	false	true	7	7	0.636282	0.37383	0.602771	0.509695	-0.427326	-0.219848	5.70843	5.19873	0.3687	0.2978	0	0	0	0	0	0	0	0	0	0	0	1	1	0	0	0	0	0	0	1	0	0	0	1	0	0	0	0	0	1
337	18522	membrane protein	-	-	ACP77_RS11400;-	false	true	7	7	0.636282	0.37383	0.602771	0.509695	-0.427326	-0.219848	5.70843	5.19873	0.3687	0.2978	0	0	0	0	0	0	0	0	0	0	0	1	1	0	0	0	0	0	0	1	0	0	0	1	0	0	0	0	0	1
338	18946	hypothetical protein	-	-	ACP77_RS11345;-	false	true	7	7	0.636282	0.37383	0.602771	0.509695	-0.427326	-0.219848	5.70843	5.19873	0.3687	0.2978	0	0	0	0	0	0	0	0	0	0	0	1	1	0	0	0	0	0	0	1	0	0	0	1	0	0	0	0	0	1
339	20190	hypothetical protein	-	-	ACP77_RS11365;-	false	true	7	7	0.636282	0.37383	0.602771	0.509695	-0.427326	-0.219848	5.70843	5.19873	0.3687	0.2978	0	0	0	0	0	0	0	0	0	0	0	1	1	0	0	0	0	0	0	1	0	0	0	1	0	0	0	0	0	1
340	20846	hypothetical protein	-	-	ACP77_RS11380;-	false	true	7	7	0.636282	0.37383	0.602771	0.509695	-0.427326	-0.219848	5.70843	5.19873	0.3687	0.2978	0	0	0	0	0	0	0	0	0	0	0	1	1	0	0	0	0	0	0	1	0	0	0	1	0	0	0	0	0	1
341	22163	hypothetical protein	-	-	ACP77_RS11370;-	false	true	7	7	0.636282	0.37383	0.602771	0.509695	-0.427326	-0.219848	5.70843	5.19873	0.3687	0.2978	0	0	0	0	0	0	0	0	0	0	0	1	1	0	0	0	0	0	0	1	0	0	0	1	0	0	0	0	0	1
342	2110	cytosine methyltransferase	-	-	NS86_RS20270;-	false	true	6	6	0.639839	0.370932	0.854456	0.192159	-0.430706	-0.0683102	5.43733	5.24517	0.3727	0.4271	0	0	0	0	0	0	0	0	0	0	0	0	0	0	0	1	0	0	0	1	0	0	1	0	1	0	0	0	0	0
343	5969	integrase	-	-	Q009_RS21250;Q009_02725	false	true	6	6	0.639839	0.370932	0.641175	0.487768	-0.430706	-0.193023	5.69883	5.21107	0.3711	0.323	0	0	0	0	0	0	0	0	0	0	0	1	0	0	0	0	0	1	0	0	0	1	0	1	0	0	0	0	0	0
344	26975	hypothetical protein	-	-	Q009_RS38400;Q009_06291	false	true	6	6	0.639839	0.370932	0.641175	0.487768	-0.430706	-0.193023	5.69883	5.21107	0.3711	0.323	0	0	0	0	0	0	0	0	0	0	0	1	0	0	0	0	0	1	0	0	0	1	0	1	0	0	0	0	0	0
345	3176	hypothetical protein	-	-	NR50_RS21015;-	false	true	1	1	0.655343	0.369508	0.829501	0.524745	-0.432376	-0.0811833	5.782	5.25725	0.3748	0.3808	0	0	0	0	0	0	0	0	0	0	0	0	0	0	0	0	0	0	0	0	0	0	0	0	0	0	0	0	0	0
346	348	tape measure domain-containing protein	-	-	NT49_RS21875;-	false	true	10	10	0.640535	0.368183	0.822499	0.190486	-0.433937	-0.0848646	5.4212	5.23071	0.3637	0.4064	0	0	0	0	1	0	1	0	0	0	0	0	0	0	0	1	1	0	0	0	0	0	0	0	1	0	0	0	0	0
347	16916	phage tail protein I	-	-	ACP77_RS15490;-	false	true	5	5	0.650994	0.360559	0.49414	0.774528	-0.443024	-0.30615	5.9674	5.19287	0.3601	0.2405	0	0	0	0	1	0	0	0	1	0	0	0	0	0	0	0	0	0	0	0	0	0	0	0	0	0	0	0	0	0
348	21665	transcriptional regulator	-	-	PACIG1_RS31750;-	false	true	4	4	0.653549	0.359207	0.73898	0.418333	-0.444655	-0.131367	5.6535	5.23517	0.3562	0.3642	0	0	0	0	0	0	0	0	0	0	0	0	0	0	0	0	0	0	0	1	1	0	0	0	0	0	0	0	0	0
349	21377	hypothetical protein	-	-	NT80_RS31435;-	false	true	4	4	0.653549	0.359207	0.552163	0.7455	-0.444655	-0.257933	5.9555	5.21	0.352	0.271	0	0	0	0	0	0	0	1	0	0	0	0	0	1	0	0	0	0	0	0	0	0	0	0	0	0	0	0	0	0
350	26548	hypothetical protein	-	-	Q009_RS28705;Q009_04285	false	true	30	18	0.649768	0.357384	0.610982	0.357438	-0.446865	-0.213972	5.50106	5.14362	0.3405	0.2913	0	0	1	0	0	0	0	0	0	1	0	1	2	0	0	0	0	1	0	3	1	4	0	0	0	1	0	1	0	0
351	20705	hypothetical protein	PA14_RS19895;PA14_48980	PA0719;-	PA14_RS19895;PA14_48980	false	true	38	37	0.653161	0.354325	0.743581	0.24156	-0.450598	-0.128672	5.33703	5.09547	0.3466	0.3702	1	1	0	1	0	2	1	1	0	1	1	1	1	1	1	1	1	0	0	0	0	0	1	1	1	1	0	0	1	1
352	12637	hypothetical protein	-	-	ACP77_RS05535;-	false	true	5	5	0.662409	0.349006	0.500358	0.763464	-0.457167	-0.30072	5.9574	5.19394	0.3486	0.2523	0	0	1	0	0	0	0	0	0	1	0	0	0	0	0	0	0	0	0	0	0	0	0	0	0	0	0	0	0	0
353	13994	hypothetical protein	-	-	ACP77_RS05540;-	false	true	5	5	0.662409	0.349006	0.500358	0.763464	-0.457167	-0.30072	5.9574	5.19394	0.3486	0.2523	0	0	1	0	0	0	0	0	0	1	0	0	0	0	0	0	0	0	0	0	0	0	0	0	0	0	0	0	0	0
354	2324	hypothetical protein	-	-	P998_RS17080;P998_05856	false	true	1	1	0.679542	0.344657	0.80835	0.59102	-0.462613	-0.0924004	5.847	5.25598	0.3711	0.3733	0	0	0	0	0	0	0	0	0	0	0	0	0	0	0	0	0	0	0	0	0	0	0	0	0	0	0	0	0	0
355	5008	hypothetical protein	-	-	P998_RS35300;P998_05848	false	true	1	1	0.679542	0.344657	0.80835	0.59102	-0.462613	-0.0924004	5.847	5.25598	0.3711	0.3733	0	0	0	0	0	0	0	0	0	0	0	0	0	0	0	0	0	0	0	0	0	0	0	0	0	0	0	0	0	0
356	6180	zonular occludens toxin	-	-	P998_RS35290;P998_05846	false	true	1	1	0.679542	0.344657	0.80835	0.59102	-0.462613	-0.0924004	5.847	5.25598	0.3711	0.3733	0	0	0	0	0	0	0	0	0	0	0	0	0	0	0	0	0	0	0	0	0	0	0	0	0	0	0	0	0	0
357	7313	hypothetical protein	-	-	P998_RS35025;P998_05787	false	true	1	1	0.679542	0.344657	0.80835	0.59102	-0.462613	-0.0924004	5.847	5.25598	0.3711	0.3733	0	0	0	0	0	0	0	0	0	0	0	0	0	0	0	0	0	0	0	0	0	0	0	0	0	0	0	0	0	0
358	7877	hypothetical protein	-	-	P998_RS35030;P998_05788	false	true	1	1	0.679542	0.344657	0.80835	0.59102	-0.462613	-0.0924004	5.847	5.25598	0.3711	0.3733	0	0	0	0	0	0	0	0	0	0	0	0	0	0	0	0	0	0	0	0	0	0	0	0	0	0	0	0	0	0
359	14607	chromosome partitioning protein ParA	-	-	P998_RS35280;P998_05842	false	true	1	1	0.679542	0.344657	0.80835	0.59102	-0.462613	-0.0924004	5.847	5.25598	0.3711	0.3733	0	0	0	0	0	0	0	0	0	0	0	0	0	0	0	0	0	0	0	0	0	0	0	0	0	0	0	0	0	0
360	16806	hypothetical protein	-	-	P998_RS35145;P998_05813	false	true	1	1	0.679542	0.344657	0.80835	0.59102	-0.462613	-0.0924004	5.847	5.25598	0.3711	0.3733	0	0	0	0	0	0	0	0	0	0	0	0	0	0	0	0	0	0	0	0	0	0	0	0	0	0	0	0	0	0
361	22556	hypothetical protein	-	-	P998_RS35295;P998_05847	false	true	1	1	0.679542	0.344657	0.80835	0.59102	-0.462613	-0.0924004	5.847	5.25598	0.3711	0.3733	0	0	0	0	0	0	0	0	0	0	0	0	0	0	0	0	0	0	0	0	0	0	0	0	0	0	0	0	0	0
362	23414	hypothetical protein	-	-	P998_RS35115;P998_05807	false	true	1	1	0.679542	0.344657	0.80835	0.59102	-0.462613	-0.0924004	5.847	5.25598	0.3711	0.3733	0	0	0	0	0	0	0	0	0	0	0	0	0	0	0	0	0	0	0	0	0	0	0	0	0	0	0	0	0	0
363	24597	hypothetical protein	-	-	P998_RS0106570;-	false	true	1	1	0.679542	0.344657	0.80835	0.59102	-0.462613	-0.0924004	5.847	5.25598	0.3711	0.3733	0	0	0	0	0	0	0	0	0	0	0	0	0	0	0	0	0	0	0	0	0	0	0	0	0	0	0	0	0	0
364	24832	hypothetical protein	-	-	P998_RS35085;P998_05800	false	true	1	1	0.679542	0.344657	0.80835	0.59102	-0.462613	-0.0924004	5.847	5.25598	0.3711	0.3733	0	0	0	0	0	0	0	0	0	0	0	0	0	0	0	0	0	0	0	0	0	0	0	0	0	0	0	0	0	0
365	25880	hypothetical protein	-	-	P998_RS35125;P998_05809	false	true	1	1	0.679542	0.344657	0.80835	0.59102	-0.462613	-0.0924004	5.847	5.25598	0.3711	0.3733	0	0	0	0	0	0	0	0	0	0	0	0	0	0	0	0	0	0	0	0	0	0	0	0	0	0	0	0	0	0
366	26071	hypothetical protein	-	-	P998_RS35095;P998_05802	false	true	1	1	0.679542	0.344657	0.80835	0.59102	-0.462613	-0.0924004	5.847	5.25598	0.3711	0.3733	0	0	0	0	0	0	0	0	0	0	0	0	0	0	0	0	0	0	0	0	0	0	0	0	0	0	0	0	0	0
367	27763	hypothetical protein	-	-	NS12_RS19885;-	false	true	2	2	0.674383	0.342935	0.588081	0.94136	-0.464788	-0.230563	6.1725	5.23114	0.3315	0.2797	0	0	0	0	0	0	0	0	0	0	0	0	0	1	0	0	0	0	0	0	0	0	0	0	0	0	0	0	0	0
368	4251	replicative DNA helicase	-	-	ACP77_RS11290;-	false	true	2	2	0.674383	0.342935	0.480747	1.22424	-0.464788	-0.318083	6.4445	5.22026	0.3308	0.2368	0	0	0	0	0	0	0	0	0	0	1	0	0	0	0	0	0	0	0	0	0	0	0	0	0	0	0	0	0	0
369	11516	hypothetical protein	-	-	ACP77_RS11285;-	false	true	2	2	0.674383	0.342935	0.480747	1.22424	-0.464788	-0.318083	6.4445	5.22026	0.3308	0.2368	0	0	0	0	0	0	0	0	0	0	1	0	0	0	0	0	0	0	0	0	0	0	0	0	0	0	0	0	0	0
370	21208	hypothetical protein	-	-	NS12_RS00440;-	false	true	5	5	0.690281	0.320748	0.768267	0.334409	-0.493835	-0.114488	5.5696	5.23519	0.3085	0.3721	0	0	0	0	0	0	0	0	0	0	0	1	0	1	0	0	0	0	0	0	0	0	0	0	0	0	0	0	0	0
371	8261	hypothetical protein	-	-	NT47_RS32520;-	false	true	1	1	0.703	0.320458	0.734059	0.827569	-0.494228	-0.134269	6.079	5.25143	0.34	0.349	0	0	0	0	0	0	0	0	0	0	0	0	0	0	0	0	0	0	0	0	0	0	0	0	0	0	0	0	0	0
372	15049	hypothetical protein	-	-	NT47_RS32525;-	false	true	1	1	0.703	0.320458	0.734059	0.827569	-0.494228	-0.134269	6.079	5.25143	0.34	0.349	0	0	0	0	0	0	0	0	0	0	0	0	0	0	0	0	0	0	0	0	0	0	0	0	0	0	0	0	0	0
373	19652	hypothetical protein	-	-	NT47_RS32515;-	false	true	1	1	0.703	0.320458	0.734059	0.827569	-0.494228	-0.134269	6.079	5.25143	0.34	0.349	0	0	0	0	0	0	0	0	0	0	0	0	0	0	0	0	0	0	0	0	0	0	0	0	0	0	0	0	0	0
374	22003	hypothetical protein	-	-	NT47_RS08310;-	false	true	1	1	0.703	0.320458	0.734059	0.827569	-0.494228	-0.134269	6.079	5.25143	0.34	0.349	0	0	0	0	0	0	0	0	0	0	0	0	0	0	0	0	0	0	0	0	0	0	0	0	0	0	0	0	0	0
375	24852	hypothetical protein	-	-	NT47_RS08675;-	false	true	1	1	0.703	0.320458	0.734059	0.827569	-0.494228	-0.134269	6.079	5.25143	0.34	0.349	0	0	0	0	0	0	0	0	0	0	0	0	0	0	0	0	0	0	0	0	0	0	0	0	0	0	0	0	0	0
376	22011	hypothetical protein	-	-	Q000_RS14285;Q000_01525	false	true	3	3	0.695047	0.318834	0.697746	0.557129	-0.496435	-0.156302	5.79233	5.2352	0.3144	0.3401	0	0	0	0	0	0	0	0	0	0	1	0	0	0	0	0	0	0	0	0	0	0	0	0	0	0	0	0	0	0
377	26972	hypothetical protein	-	-	Q000_RS14325;Q000_01534	false	true	3	3	0.695047	0.318834	0.697746	0.557129	-0.496435	-0.156302	5.79233	5.2352	0.3144	0.3401	0	0	0	0	0	0	0	0	0	0	1	0	0	0	0	0	0	0	0	0	0	0	0	0	0	0	0	0	0	0
378	5119	hypothetical protein	PA14_RS19855;PA14_48890	PA0727;-	PA14_RS19855;PA14_48890	false	true	75	44	0.69401	0.314943	0.59556	0.49175	-0.501767	-0.225075	5.343	4.85125	0.3104	0.299	1	2	1	1	0	3	1	1	0	3	2	1	1	2	3	2	1	0	1	3	0	0	2	1	2	1	2	1	2	1
379	20346	hypothetical protein	-	-	ACP77_RS11425;-	false	true	16	14	0.693376	0.313905	0.544769	0.456188	-0.503202	-0.263788	5.60071	5.14453	0.3082	0.2686	0	0	0	0	0	1	0	2	0	0	1	0	1	0	0	0	1	0	0	1	0	0	0	0	0	0	0	0	0	1
380	27422	hypothetical protein	-	-	ACP77_RS05510;-	false	true	7	5	0.701142	0.309719	0.420935	0.910834	-0.509032	-0.375785	6.0906	5.17977	0.3052	0.2108	0	0	1	0	0	0	0	0	0	0	0	0	0	0	0	0	0	1	0	0	0	0	0	0	0	0	0	0	0	1
381	26678	hypothetical protein	-	-	Q009_RS0107370;-	false	true	4	4	0.702735	0.309262	0.695404	0.491458	-0.509673	-0.157763	5.721	5.22954	0.3046	0.3409	0	0	0	0	0	0	0	0	0	0	0	0	0	0	0	0	0	1	0	0	0	1	0	0	0	0	0	0	0	0
382	1746	terminase	-	-	NT56_RS27615;-	false	true	10	10	0.699311	0.308819	0.697166	0.330267	-0.510296	-0.156664	5.5341	5.20383	0.3078	0.3483	0	0	0	0	1	0	0	1	0	0	0	0	0	0	0	1	0	0	0	0	0	0	1	0	1	0	0	0	0	0
383	3901	portal protein	-	-	NT56_RS27605;-	false	true	10	10	0.699311	0.308819	0.697166	0.330267	-0.510296	-0.156664	5.5341	5.20383	0.3078	0.3483	0	0	0	0	1	0	0	1	0	0	0	0	0	0	0	1	0	0	0	0	0	0	1	0	1	0	0	0	0	0
384	26668	hypothetical protein	-	-	ACP77_RS11220;-	false	true	15	14	0.700581	0.306624	0.650148	0.341925	-0.513394	-0.186988	5.51721	5.17529	0.3036	0.3224	0	0	0	0	0	0	1	1	0	0	0	0	1	0	0	0	1	0	0	2	0	0	1	1	0	0	0	0	0	1
385	17473	hypothetical protein	-	-	Q000_RS14350;Q000_01541	false	true	3	3	0.708653	0.304953	0.634718	0.681293	-0.515767	-0.197419	5.90933	5.22804	0.2979	0.3052	0	0	0	0	0	0	0	0	0	0	1	0	0	0	0	0	0	0	0	0	0	0	0	0	0	0	0	0	0	0
386	5912	HK97 family phage portal protein	-	-	Q009_RS27635;Q009_04059	false	true	3	3	0.708653	0.304953	0.567765	0.818898	-0.515767	-0.245831	6.039	5.2201	0.3041	0.2801	0	0	0	0	0	0	0	0	0	0	0	0	0	0	0	0	0	0	0	0	0	1	0	0	0	1	0	0	0	0
387	6040	phage capsid protein	-	-	Q009_RS27625;Q009_04057	false	true	3	3	0.708653	0.304953	0.567765	0.818898	-0.515767	-0.245831	6.039	5.2201	0.3041	0.2801	0	0	0	0	0	0	0	0	0	0	0	0	0	0	0	0	0	0	0	0	0	1	0	0	0	1	0	0	0	0
388	14544	HK97 family phage prohead protease	-	-	Q009_RS27630;Q009_04058	false	true	3	3	0.708653	0.304953	0.567765	0.818898	-0.515767	-0.245831	6.039	5.2201	0.3041	0.2801	0	0	0	0	0	0	0	0	0	0	0	0	0	0	0	0	0	0	0	0	0	1	0	0	0	1	0	0	0	0
389	20147	HNH endonuclease	-	-	Q009_RS27650;Q009_04062	false	true	3	3	0.708653	0.304953	0.567765	0.818898	-0.515767	-0.245831	6.039	5.2201	0.3041	0.2801	0	0	0	0	0	0	0	0	0	0	0	0	0	0	0	0	0	0	0	0	0	1	0	0	0	1	0	0	0	0
390	19847	hypothetical protein	-	-	ACP77_RS05560;-	false	true	4	4	0.708653	0.303237	0.550136	0.749292	-0.518218	-0.25953	5.959	5.20971	0.3049	0.2696	0	0	0	0	0	0	0	0	0	1	0	0	0	0	0	0	0	0	0	0	0	0	0	1	0	0	0	0	0	0
391	18364	hypothetical protein	-	-	Q006_RS0105800;-	false	true	14	11	0.704627	0.303155	0.693523	0.322745	-0.518336	-0.158939	5.52182	5.19907	0.2976	0.3401	1	0	0	0	0	0	0	0	0	0	2	0	0	1	0	0	0	0	0	1	0	0	0	0	0	1	0	0	0	0
392	12816	hypothetical protein	-	-	ACP77_RS05635;-	false	true	9	9	0.706861	0.301514	0.459819	0.652202	-0.520692	-0.337414	5.80667	5.15447	0.2973	0.2247	0	0	1	0	0	0	0	0	0	1	0	0	1	0	0	0	0	0	0	1	0	0	0	0	0	0	0	0	0	0
393	227	tail length tape measure protein	-	-	ACP77_RS03055;-	false	true	14	14	0.707709	0.299419	0.619855	0.373887	-0.523721	-0.20771	5.54057	5.16668	0.2939	0.3062	0	0	1	0	0	0	0	1	0	0	0	1	1	0	0	0	0	0	0	1	0	0	0	0	0	0	0	1	0	0
394	16745	DNA packaging protein	-	-	NT80_RS01550;-	false	true	5	5	0.711826	0.298858	0.468589	0.820774	-0.524535	-0.329208	6.0092	5.18843	0.2952	0.2331	0	0	1	0	0	0	0	0	0	0	0	0	0	0	0	0	0	0	0	1	0	0	0	0	0	0	0	0	0	0
395	25477	hypothetical protein	-	-	PACIG1_RS31130;PACIG1_5924	false	true	6	6	0.711757	0.298097	0.571461	0.591957	-0.525643	-0.243014	5.791	5.19904	0.293	0.28	0	0	0	0	0	0	0	0	0	0	0	0	0	1	0	0	0	0	1	0	1	0	0	0	0	0	0	0	0	0
396	8718	hypothetical protein	-	-	NR77_RS10635;-	false	true	1	1	0.72564	0.297	0.726497	0.852039	-0.527244	-0.138766	6.103	5.25096	0.3225	0.3241	0	0	0	0	0	0	0	0	0	0	0	0	0	0	0	0	0	0	0	0	0	0	0	0	0	0	0	0	0	0
397	9688	cell division protein FtsK	-	-	NR77_RS31540;-	false	true	1	1	0.72564	0.297	0.726497	0.852039	-0.527244	-0.138766	6.103	5.25096	0.3225	0.3241	0	0	0	0	0	0	0	0	0	0	0	0	0	0	0	0	0	0	0	0	0	0	0	0	0	0	0	0	0	0
398	24793	hypothetical protein	-	-	Q000_RS14560;Q000_01586	false	true	11	10	0.715274	0.292657	0.5695	0.482305	-0.533641	-0.244506	5.6569	5.1746	0.2935	0.2897	0	0	0	0	1	0	0	0	0	0	2	0	0	0	0	1	0	0	0	1	0	0	0	1	0	0	0	0	0	0
399	24800	hypothetical protein	-	-	NT80_RS16770;-	false	true	3	2	0.724012	0.292115	0.534868	1.07812	-0.534447	-0.271753	6.304	5.22588	0.2834	0.2569	0	0	0	0	0	0	0	0	0	0	0	0	0	0	0	0	0	1	0	0	0	0	0	0	0	0	0	0	0	0
400	14657	hypothetical protein	-	-	Q000_RS14280;Q000_01524	false	true	6	6	0.721454	0.288243	0.585419	0.570667	-0.540241	-0.232533	5.77217	5.2015	0.2858	0.2872	0	0	0	0	0	0	0	0	0	0	1	0	1	0	0	0	0	0	0	1	0	0	0	0	0	0	0	0	0	0
401	9238	coat protein	-	-	ACP77_RS15645;-	false	true	9	8	0.724418	0.284117	0.546912	0.557852	-0.546503	-0.262083	5.73937	5.18152	0.282	0.2716	0	0	0	0	0	0	0	0	0	0	1	0	0	1	0	0	0	0	0	1	0	0	0	0	0	0	0	1	0	1
402	14363	DNA-binding protein	-	-	NT88_RS14310;-	false	true	3	3	0.734981	0.278031	0.386268	1.23914	-0.555907	-0.413111	6.435	5.19586	0.2734	0.192	0	0	0	0	0	1	0	0	0	0	0	0	0	0	0	0	0	0	0	0	0	0	0	0	0	0	0	0	0	0
403	11655	ATP-binding protein	-	-	NQ67_RS31425;-	false	true	2	2	0.739689	0.275988	0.472729	1.2466	-0.55911	-0.325388	6.466	5.2194	0.2701	0.2277	0	0	0	0	0	0	0	0	0	0	0	0	0	0	0	0	0	1	0	0	0	0	0	0	0	0	0	0	0	0
404	11913	phage replication protein O	-	-	NQ67_RS31430;-	false	true	2	2	0.739689	0.275988	0.472729	1.2466	-0.55911	-0.325388	6.466	5.2194	0.2701	0.2277	0	0	0	0	0	0	0	0	0	0	0	0	0	0	0	0	0	1	0	0	0	0	0	0	0	0	0	0	0	0
405	253	head protein	-	-	Q009_RS28790;Q009_04303	false	true	11	5	0.742751	0.267363	0.586178	0.6172	-0.572899	-0.23197	5.8252	5.208	0.2622	0.2878	0	0	0	0	0	0	0	0	0	0	0	0	0	0	0	0	0	2	0	0	0	4	0	0	0	0	0	0	0	0
406	5286	phage head morphogenesis protein	-	-	Q009_RS28805;Q009_04306	false	true	8	5	0.742751	0.267363	0.586178	0.6172	-0.572899	-0.23197	5.8252	5.208	0.2622	0.2878	0	0	0	0	0	0	0	0	0	0	0	0	0	0	0	0	0	1	0	0	0	4	0	0	0	0	0	0	0	0
407	24860	hypothetical protein	-	-	Q009_RS22140;Q009_02908	false	true	22	16	0.740332	0.266136	0.522291	0.463076	-0.574896	-0.282087	5.58794	5.12486	0.2628	0.2614	0	0	0	0	0	0	0	2	0	0	0	2	2	1	0	0	1	0	0	2	0	1	0	2	0	0	0	0	0	1
408	12633	hypothetical protein	-	-	Q009_RS28265;Q009_04192	false	true	2	2	0.754893	0.260311	0.453452	1.3012	-0.584507	-0.343468	6.5185	5.2173	0.2573	0.2227	0	0	0	0	0	0	0	0	0	0	0	0	0	0	0	0	0	0	0	0	0	1	0	0	0	0	0	0	0	0
409	18195	hypothetical protein	-	-	Q009_RS28775;Q009_04299	false	true	5	2	0.754893	0.260311	0.453452	1.3012	-0.584507	-0.343468	6.5185	5.2173	0.2573	0.2227	0	0	0	0	0	0	0	0	0	0	0	0	0	0	0	0	0	0	0	0	0	4	0	0	0	0	0	0	0	0
410	27423	ninG protein	-	-	ACP77_RS05545;-	false	true	7	7	0.748656	0.259965	0.327037	0.956565	-0.585086	-0.485403	6.09514	5.13858	0.2567	0.1641	0	0	1	0	0	1	0	0	0	0	0	0	0	0	0	0	0	0	0	0	0	0	0	1	0	0	0	0	0	0
411	4976	hypothetical protein	PA14_RS24120;PA14_59100	-	PA14_RS24120;PA14_59100	false	true	17	15	0.747469	0.259027	0.691498	0.292962	-0.586654	-0.160209	5.4758	5.18284	0.2633	0.3477	0	0	0	1	0	0	0	0	0	0	1	1	1	0	0	0	0	0	1	0	0	0	0	0	1	0	0	0	1	0
412	2740	hypothetical protein	-	-	JF43_RS12015;JF43_12105	false	true	1	1	0.768203	0.252606	0.684151	0.990706	-0.597556	-0.164848	6.239	5.24829	0.2907	0.2932	0	0	0	0	0	0	0	0	0	0	0	0	0	0	0	0	0	0	0	0	0	0	0	0	0	0	0	0	0	0
413	12197	hypothetical protein	-	-	JF43_RS11980;JF43_12070	false	true	1	1	0.768203	0.252606	0.684151	0.990706	-0.597556	-0.164848	6.239	5.24829	0.2907	0.2932	0	0	0	0	0	0	0	0	0	0	0	0	0	0	0	0	0	0	0	0	0	0	0	0	0	0	0	0	0	0
414	18261	hypothetical protein	-	-	JF43_RS12060;-	false	true	1	1	0.768203	0.252606	0.684151	0.990706	-0.597556	-0.164848	6.239	5.24829	0.2907	0.2932	0	0	0	0	0	0	0	0	0	0	0	0	0	0	0	0	0	0	0	0	0	0	0	0	0	0	0	0	0	0
415	6908	hypothetical protein	-	-	PACIG1_RS31135;PACIG1_5925	false	true	3	3	0.760043	0.252324	0.505082	0.954735	-0.598041	-0.296638	6.167	5.21227	0.2514	0.2452	0	0	0	0	0	0	0	0	0	0	0	0	0	0	0	0	0	0	0	0	1	0	0	0	0	0	0	0	0	0
416	11167	hypothetical protein	-	-	NS72_RS25335;-	false	true	4	4	0.75928	0.251541	0.403436	1.04585	-0.599391	-0.394226	6.23275	5.1869	0.2463	0.1999	0	0	0	0	0	0	0	0	0	0	0	0	1	0	0	0	0	0	0	1	0	0	0	0	0	0	0	0	0	0
417	23089	hypothetical protein	-	-	Q000_RS14340;Q000_01538	false	true	6	6	0.758578	0.250444	0.507548	0.692754	-0.601289	-0.294523	5.88017	5.18741	0.2451	0.2484	0	0	0	0	0	0	0	1	0	0	1	0	0	0	0	0	0	0	0	0	0	0	0	0	0	0	0	0	0	0
418	19044	DNA-binding protein	PA14_RS19890;PA14_48970	PA0720;-	PA14_RS19890;PA14_48970	false	true	50	40	0.756476	0.250381	0.541499	0.484158	-0.601399	-0.266403	5.37908	4.89492	0.2458	0.272	1	1	0	1	0	1	1	1	0	2	2	1	1	2	2	1	1	0	0	2	0	0	1	1	1	1	0	1	1	1
419	15866	hypothetical protein	-	-	Q009_RS27545;Q009_04040	false	true	16	13	0.760512	0.246099	0.370787	0.689077	-0.60889	-0.430875	5.78415	5.09508	0.2485	0.1863	0	0	2	0	0	0	0	0	0	2	0	0	2	0	0	0	0	0	0	1	0	1	0	1	0	1	0	0	0	0
420	24175	hypothetical protein	-	-	Q009_RS27530;Q009_04037	false	true	15	13	0.760512	0.246099	0.370787	0.689077	-0.60889	-0.430875	5.78415	5.09508	0.2485	0.1863	0	0	1	0	0	0	0	0	0	2	0	0	1	0	0	0	0	0	0	2	0	1	0	1	0	1	0	0	0	0
421	25476	hypothetical protein	-	-	NQ67_RS11970;-	false	true	2	2	0.769607	0.245107	0.420387	1.39792	-0.610645	-0.376351	6.6115	5.21358	0.246	0.2183	0	0	0	0	0	0	0	0	0	0	0	0	0	0	0	0	0	0	0	1	0	0	0	0	0	0	0	0	0	0
422	20229	hypothetical protein	-	-	Q009_RS17890;Q009_02034	false	true	4	4	0.769843	0.24072	0.543931	0.760938	-0.618488	-0.264456	5.96975	5.20881	0.2469	0.2749	0	0	0	0	0	0	0	0	0	0	0	0	0	0	0	0	0	0	0	0	0	1	0	1	0	0	0	0	0	0
423	20880	hypothetical protein	-	-	ACP77_RS05465;-	false	true	3	3	0.772072	0.239957	0.236252	1.68839	-0.619867	-0.626624	6.85833	5.16994	0.2401	0.1262	0	0	1	0	0	0	0	0	0	0	0	0	0	0	0	0	0	0	0	0	0	0	0	0	0	0	0	0	0	0
424	1783	hypothetical protein	-	-	NT42_RS12545;-	false	true	4	4	0.780141	0.230157	0.630328	0.603854	-0.637975	-0.200434	5.82475	5.2209	0.2262	0.3101	1	0	0	0	0	0	0	0	0	0	0	0	0	0	0	0	0	0	0	0	0	0	0	0	0	0	0	0	0	0
425	7257	integrase	-	-	Q000_RS14260;Q000_01519	false	true	5	5	0.781129	0.228145	0.473181	0.812366	-0.64179	-0.324973	6.0016	5.18923	0.2191	0.2299	0	0	0	0	0	0	0	0	0	0	1	0	0	0	0	0	1	0	0	0	0	0	0	0	0	0	0	0	0	0
426	24053	Pyocin activator protein PrtN	-	-	Q000_RS14265;Q000_01520	false	true	5	5	0.781129	0.228145	0.473181	0.812366	-0.64179	-0.324973	6.0016	5.18923	0.2191	0.2299	0	0	0	0	0	0	0	0	0	0	1	0	0	0	0	0	1	0	0	0	0	0	0	0	0	0	0	0	0	0
427	23205	histidine kinase	-	-	PACI27_RS31665;PACI27_6117	false	true	5	5	0.781129	0.228145	0.432842	0.887821	-0.64179	-0.363671	6.0698	5.18198	0.2195	0.213	0	0	0	0	0	0	0	0	0	0	0	0	0	1	0	0	0	0	1	0	0	0	0	0	0	0	0	0	0	0
428	24533	hypothetical protein	-	-	PACI27_RS31670;-	false	true	5	5	0.781129	0.228145	0.432842	0.887821	-0.64179	-0.363671	6.0698	5.18198	0.2195	0.213	0	0	0	0	0	0	0	0	0	0	0	0	0	1	0	0	0	0	1	0	0	0	0	0	0	0	0	0	0	0
429	25042	hypothetical protein	-	-	ACP77_RS11255;-	false	true	3	3	0.783754	0.227928	0.371814	1.27699	-0.642202	-0.429674	6.47067	5.19367	0.2287	0.1897	0	0	0	0	0	0	0	0	0	0	0	0	0	0	0	0	0	1	0	0	0	0	0	0	0	0	0	0	0	1
430	22351	holin	-	-	ACP77_RS05565;-	false	true	4	4	0.79017	0.219859	0.297921	1.30044	-0.657856	-0.525899	6.46775	5.16731	0.2187	0.1508	0	0	0	0	0	0	0	0	0	0	0	0	1	0	0	0	0	0	0	1	0	0	0	0	0	0	0	0	0	0
431	1373	hypothetical protein	-	-	ACP77_RS20380;-	false	true	9	8	0.78783	0.219597	0.48825	0.641466	-0.658373	-0.311358	5.81013	5.16866	0.2138	0.2402	1	0	0	0	0	0	0	0	0	0	0	0	1	0	0	0	0	0	0	0	1	0	0	0	0	0	0	0	0	2
432	21065	carbon storage regulator	-	-	ACP77_RS11230;-	false	true	20	19	0.787605	0.21795	0.428076	0.549145	-0.661642	-0.368479	5.61584	5.0667	0.216	0.2134	0	0	0	0	0	0	1	1	0	0	2	1	1	0	0	0	1	0	0	1	0	0	1	1	0	0	0	0	0	1
433	1314	hypothetical protein	-	-	NR40_RS21255;-	false	true	3	3	0.795082	0.216246	0.494049	0.979497	-0.665052	-0.30623	6.19033	5.21084	0.2076	0.237	0	0	0	0	0	0	0	0	0	0	0	0	1	0	0	0	0	0	0	0	0	0	0	0	0	0	0	0	0	0
434	24382	hypothetical protein	-	-	ACP77_RS02755;-	false	true	3	2	0.797499	0.216186	0.305018	1.77596	-0.665172	-0.515675	6.975	5.19904	0.2144	0.1679	0	0	0	0	0	0	0	0	0	0	0	0	0	0	0	0	0	0	1	0	0	0	0	0	0	0	0	0	0	0
435	3825	phage protein	-	-	PACI27_RS17460;PACI27_3356	false	true	6	6	0.796907	0.211281	0.220228	1.27474	-0.675139	-0.657127	6.395	5.12026	0.2163	0.1149	0	0	1	0	0	0	0	0	0	1	0	0	0	0	0	0	0	0	0	0	0	0	0	0	0	0	0	0	0	0
436	5627	peptidase	-	-	PACI27_RS17445;PACI27_3353	false	true	6	6	0.796907	0.211281	0.220228	1.27474	-0.675139	-0.657127	6.395	5.12026	0.2163	0.1149	0	0	1	0	0	0	0	0	0	1	0	0	0	0	0	0	0	0	0	0	0	0	0	0	0	0	0	0	0	0
437	9717	phage capsid protein	-	-	PACI27_RS17435;PACI27_3351	false	true	6	6	0.796907	0.211281	0.220228	1.27474	-0.675139	-0.657127	6.395	5.12026	0.2163	0.1149	0	0	1	0	0	0	0	0	0	1	0	0	0	0	0	0	0	0	0	0	0	0	0	0	0	0	0	0	0	0
438	16109	hypothetical protein	-	-	PACI27_RS17470;PACI27_3358	false	true	6	6	0.796907	0.211281	0.220228	1.27474	-0.675139	-0.657127	6.395	5.12026	0.2163	0.1149	0	0	1	0	0	0	0	0	0	1	0	0	0	0	0	0	0	0	0	0	0	0	0	0	0	0	0	0	0	0
439	17297	bacteriophage protein	-	-	PACI27_RS17420;PACI27_3348	false	true	6	6	0.796907	0.211281	0.220228	1.27474	-0.675139	-0.657127	6.395	5.12026	0.2163	0.1149	0	0	1	0	0	0	0	0	0	1	0	0	0	0	0	0	0	0	0	0	0	0	0	0	0	0	0	0	0	0
440	20541	hypothetical protein	-	-	PACI27_RS17480;PACI27_3360	false	true	6	6	0.796907	0.211281	0.220228	1.27474	-0.675139	-0.657127	6.395	5.12026	0.2163	0.1149	0	0	1	0	0	0	0	0	0	1	0	0	0	0	0	0	0	0	0	0	0	0	0	0	0	0	0	0	0	0
441	21511	RelE/ParE family plasmid stabilization system protein	-	PA0729;-	PA0729;-	false	true	16	16	0.794692	0.210993	0.55738	0.424799	-0.675733	-0.253849	5.56144	5.13664	0.201	0.2694	0	0	0	0	0	1	0	0	0	0	1	0	0	1	1	1	0	0	0	1	0	0	0	1	0	0	1	1	0	0
442	5804	phosphoadenosine phosphosulfate reductase	-	-	ACP77_RS15595;-	false	true	6	6	0.80093	0.207163	0.227865	1.2542	-0.683688	-0.642322	6.37683	5.12263	0.207	0.1183	0	0	0	0	0	0	1	0	0	0	1	0	0	0	0	0	0	0	0	0	0	0	0	0	0	1	0	0	0	0
443	211	phage tail protein	-	-	Q009_RS28755;Q009_04295	false	true	6	3	0.806049	0.204918	0.412598	1.17229	-0.688419	-0.384473	6.372	5.19971	0.202	0.2073	0	0	0	0	0	0	0	0	0	0	0	0	0	0	0	0	0	0	0	0	0	4	0	0	0	0	0	0	0	0
444	1105	phage tail protein	-	-	ACP77_RS15495;-	false	true	3	3	0.806049	0.204918	0.194057	1.84864	-0.688419	-0.712071	7.00933	5.16069	0.2061	0.1032	0	0	0	0	1	0	0	0	0	0	0	0	0	0	0	0	0	0	0	0	0	0	0	0	0	0	0	0	0	0
445	6774	hypothetical protein	-	-	Q009_RS28715;Q009_04287	false	true	15	11	0.802739	0.203541	0.369526	0.732519	-0.691348	-0.432355	5.84491	5.11239	0.1998	0.1879	0	0	1	0	0	0	0	1	0	0	0	0	0	0	0	0	0	1	0	0	0	4	0	0	0	0	0	2	0	0
446	18394	hypothetical protein	-	-	PACI27_RS02245;PACI27_0430	false	true	4	4	0.809401	0.200076	0.444941	0.95675	-0.698806	-0.351698	6.1505	5.19375	0.1972	0.2184	0	0	0	0	0	0	0	0	0	0	0	0	0	0	0	0	0	1	0	0	0	0	0	0	0	0	0	0	0	0
447	15999	ninG protein	-	-	ACP77_RS05550;-	false	true	6	6	0.812706	0.195096	0.242646	1.21577	-0.709751	-0.615027	6.34283	5.12707	0.1936	0.125	0	0	1	0	0	0	0	0	0	1	0	0	0	0	0	0	0	0	0	0	0	0	0	0	0	0	0	0	0	0
448	24738	hypothetical protein	-	-	ACP77_RS05530;-	false	true	3	3	0.816651	0.193951	0.189155	1.8688	-0.712308	-0.723183	7.02833	5.15953	0.1902	0.1007	0	0	0	0	0	1	0	0	0	0	0	0	0	0	0	0	0	0	0	0	0	0	0	0	0	0	0	0	0	0
449	17294	host-nuclease inhibitor protein Gam	-	-	Q009_RS28895;Q009_04327	false	true	11	7	0.819	0.188146	0.382846	0.852565	-0.725506	-0.416976	6.00514	5.15258	0.1854	0.1906	0	0	0	0	0	0	0	0	0	0	0	0	0	0	0	0	0	1	0	0	1	4	0	0	0	0	0	0	0	0
450	18962	membrane protein	-	-	Q009_RS28850;Q009_04317	false	true	10	7	0.819	0.188146	0.382846	0.852565	-0.725506	-0.416976	6.00514	5.15258	0.1854	0.1906	0	0	0	0	0	0	0	0	0	0	0	0	0	0	0	0	0	1	0	0	1	4	0	0	0	0	0	0	0	0
451	26959	hypothetical protein	PA14_RS19910;PA14_49010	-	PA14_RS19910;PA14_49010	false	true	12	11	0.820865	0.185057	0.432187	0.641778	-0.732694	-0.364328	5.77336	5.13159	0.1829	0.2155	0	0	0	1	0	0	0	0	0	0	1	0	0	0	1	0	0	0	0	0	0	0	0	0	0	0	0	0	1	0
452	16659	hypothetical protein	-	-	ACP77_RS02985;-	false	true	14	14	0.820704	0.184748	0.438207	0.583256	-0.733421	-0.35832	5.69357	5.11032	0.1821	0.218	0	0	0	0	0	0	0	1	0	0	0	1	1	0	0	0	0	0	0	1	1	0	0	0	0	0	0	1	0	0
453	3861	hypothetical protein	-	-	NT80_RS29720;-	false	true	2	2	0.835337	0.176732	0.317192	1.73228	-0.752684	-0.498677	6.933	5.20072	0.1824	0.1723	0	0	0	0	0	0	0	0	0	0	0	0	0	0	0	0	0	0	0	0	0	0	0	0	0	1	0	0	0	0
454	7989	DUF1376 domain-containing protein	-	-	NT80_RS31405;-	false	true	2	2	0.835337	0.176732	0.317192	1.73228	-0.752684	-0.498677	6.933	5.20072	0.1824	0.1723	0	0	0	0	0	0	0	0	0	0	0	0	0	0	0	0	0	0	0	0	0	0	0	0	0	1	0	0	0	0
455	711	phage tail tape measure protein	-	-	Q009_RS28385;Q009_04216	false	true	9	9	0.830322	0.175862	0.250242	1.01056	-0.754829	-0.60164	6.103	5.09244	0.1745	0.1231	0	0	0	0	1	0	0	0	1	0	0	0	0	0	0	0	0	0	0	0	0	1	0	0	0	1	0	0	0	0
456	22098	tail fiber protein	-	-	Q009_RS28380;Q009_04215	false	true	9	9	0.830322	0.175862	0.250242	1.01056	-0.754829	-0.60164	6.103	5.09244	0.1745	0.1231	0	0	0	0	1	0	0	0	1	0	0	0	0	0	0	0	0	0	0	0	0	1	0	0	0	1	0	0	0	0
457	11706	DNA methyltransferase	-	-	ACP77_RS03100;-	false	true	11	11	0.832346	0.173334	0.398035	0.690204	-0.761116	-0.400079	5.81155	5.12134	0.1725	0.2004	1	0	1	0	0	0	0	1	0	0	0	0	0	0	0	0	0	0	0	0	0	0	0	0	0	0	0	1	0	0
458	4283	DNA methyltransferase	-	-	NT80_RS19240;-	false	true	4	4	0.83614	0.172489	0.300472	1.29367	-0.763238	-0.522197	6.4615	5.16783	0.1717	0.1544	0	0	0	0	0	1	0	0	0	0	0	0	0	0	0	0	0	0	0	0	0	0	0	0	0	0	0	0	0	0
459	6567	integrase	-	-	NT88_RS14230;-	false	true	3	3	0.846234	0.163255	0.383406	1.24657	-0.787134	-0.416342	6.442	5.19543	0.1636	0.1962	0	0	0	0	0	0	0	0	0	0	0	0	0	0	0	0	0	0	0	0	0	0	0	1	0	0	0	0	0	0
460	26386	hypothetical protein	-	-	NT05_RS02395;-	false	true	3	3	0.846234	0.163255	0.379473	1.25683	-0.787134	-0.420819	6.45167	5.19484	0.1645	0.1961	0	0	0	0	0	0	0	0	0	0	0	0	0	0	0	0	0	0	0	0	0	0	0	1	0	0	0	0	0	0
461	543	glycoprotein	-	-	ACP77_RS11395;-	false	true	5	5	0.847161	0.160283	0.214939	1.3972	-0.795112	-0.667684	6.5302	5.133	0.1581	0.1124	0	0	0	0	0	0	0	0	0	0	0	1	0	0	0	0	0	0	0	0	0	0	0	1	0	0	0	0	0	1
462	16414	hypothetical protein	-	-	Q009_RS27535;Q009_04038	false	true	13	12	0.846325	0.158879	0.227223	0.952342	-0.798935	-0.643548	5.99992	5.04758	0.1581	0.1156	0	0	1	0	0	0	0	0	0	2	0	0	0	0	0	0	0	0	0	1	0	1	0	1	0	1	0	0	0	0
463	7714	integrase	-	-	ACP77_RS11130;-	false	true	4	4	0.852542	0.155517	0.304581	1.28283	-0.808223	-0.516297	6.4515	5.16867	0.1553	0.1568	0	0	0	0	0	0	0	0	0	0	0	0	0	0	0	0	0	0	0	1	0	0	0	0	0	0	0	0	0	1
464	24944	hypothetical protein	-	-	ACP77_RS11135;-	false	true	4	4	0.852542	0.155517	0.304581	1.28283	-0.808223	-0.516297	6.4515	5.16867	0.1553	0.1568	0	0	0	0	0	0	0	0	0	0	0	0	0	0	0	0	0	0	0	1	0	0	0	0	0	0	0	0	0	1
465	26665	hypothetical protein	-	-	Q000_RS14345;Q000_01539	false	true	4	3	0.855351	0.153766	0.220685	1.74499	-0.81314	-0.656227	6.91167	5.16667	0.1521	0.1181	0	0	0	0	0	0	0	0	0	0	2	0	0	0	0	0	0	0	0	0	0	0	0	0	0	0	0	0	0	0
466	28790	hypothetical protein	PA14_RS19885;PA14_48960	PA0721;-	PA14_RS19885;PA14_48960	false	true	57	42	0.857253	0.148048	0.306966	0.863133	-0.829596	-0.51291	5.43333	4.5702	0.1429	0.1511	1	1	0	1	0	1	1	1	0	2	2	1	1	2	1	1	1	0	0	2	0	1	1	1	1	1	0	1	1	1
467	6740	hypothetical protein	-	-	PACIG1_RS31095;PACIG1_5916	false	true	10	9	0.864458	0.140878	0.22648	1.06229	-0.851156	-0.644971	6.14578	5.08349	0.1404	0.115	0	0	0	0	0	0	0	0	0	1	0	1	0	0	0	0	0	0	0	0	1	0	0	0	0	0	0	0	0	0
468	2739	hypothetical protein	-	-	Q009_RS27570;Q009_04045	false	true	13	11	0.866311	0.138582	0.189755	1.0655	-0.858295	-0.721807	6.10745	5.04195	0.1393	0.0959	0	0	2	0	0	0	0	0	0	2	0	0	0	0	0	0	0	0	0	1	0	1	0	0	0	1	0	0	0	0
469	16979	hypothetical protein	-	-	P998_RS35105;P998_05805	false	true	3	3	0.872472	0.135904	0.317439	1.42804	-0.866767	-0.49834	6.613	5.18496	0.1328	0.1647	0	0	0	0	0	0	0	0	0	0	0	0	0	0	0	0	0	0	0	0	0	0	0	0	0	0	0	0	0	0
470	2987	phage protein	-	-	Q009_RS28815;Q009_04308	false	true	9	6	0.87105	0.135073	0.274938	1.13701	-0.869432	-0.560765	6.27317	5.13615	0.1311	0.1377	0	0	0	0	0	0	0	0	0	0	0	0	0	0	0	0	0	1	0	0	0	4	0	0	0	0	0	0	0	0
471	3275	portal protein	-	-	Q009_RS28810;Q009_04307	false	true	9	6	0.87105	0.135073	0.274938	1.13701	-0.869432	-0.560765	6.27317	5.13615	0.1311	0.1377	0	0	0	0	0	0	0	0	0	0	0	0	0	0	0	0	0	1	0	0	0	4	0	0	0	0	0	0	0	0
472	7258	protease(I) and scaffold(Z) protein	-	-	Q009_RS28795;Q009_04304	false	true	10	6	0.87105	0.135073	0.274938	1.13701	-0.869432	-0.560765	6.27317	5.13615	0.1311	0.1377	0	0	0	0	0	0	0	0	0	0	0	0	0	0	0	0	0	1	0	0	0	4	0	0	0	0	0	0	0	0
473	14304	hypothetical protein	-	-	Q009_RS28915;Q009_04332	false	true	10	6	0.87105	0.135073	0.274938	1.13701	-0.869432	-0.560765	6.27317	5.13615	0.1311	0.1377	0	0	0	0	0	0	0	0	0	0	0	0	0	0	0	0	0	1	0	0	0	4	0	0	0	0	0	0	0	0
474	16996	DNA-binding protein	-	-	Q009_RS28825;Q009_04310	false	true	9	6	0.87105	0.135073	0.274938	1.13701	-0.869432	-0.560765	6.27317	5.13615	0.1311	0.1377	0	0	0	0	0	0	0	0	0	0	0	0	0	0	0	0	0	1	0	0	0	4	0	0	0	0	0	0	0	0
475	17300	hypothetical protein	-	-	Q009_RS28760;Q009_04296	false	true	9	6	0.87105	0.135073	0.274938	1.13701	-0.869432	-0.560765	6.27317	5.13615	0.1311	0.1377	0	0	0	0	0	0	0	0	0	0	0	0	0	0	0	0	0	1	0	0	0	4	0	0	0	0	0	0	0	0
476	18331	phage morphogenesis protein	-	-	Q009_RS28800;Q009_04305	false	true	10	6	0.87105	0.135073	0.274938	1.13701	-0.869432	-0.560765	6.27317	5.13615	0.1311	0.1377	0	0	0	0	0	0	0	0	0	0	0	0	0	0	0	0	0	1	0	0	0	4	0	0	0	0	0	0	0	0
477	18454	hypothetical protein	-	-	Q009_RS28845;Q009_04315	false	true	9	6	0.87105	0.135073	0.274938	1.13701	-0.869432	-0.560765	6.27317	5.13615	0.1311	0.1377	0	0	0	0	0	0	0	0	0	0	0	0	0	0	0	0	0	1	0	0	0	4	0	0	0	0	0	0	0	0
478	19807	hypothetical protein	-	-	Q009_RS28905;Q009_04329	false	true	10	6	0.87105	0.135073	0.274938	1.13701	-0.869432	-0.560765	6.27317	5.13615	0.1311	0.1377	0	0	0	0	0	0	0	0	0	0	0	0	0	0	0	0	0	1	0	0	0	4	0	0	0	0	0	0	0	0
479	20068	hypothetical protein	-	-	Q009_RS28855;Q009_04318	false	true	9	6	0.87105	0.135073	0.274938	1.13701	-0.869432	-0.560765	6.27317	5.13615	0.1311	0.1377	0	0	0	0	0	0	0	0	0	0	0	0	0	0	0	0	0	1	0	0	0	4	0	0	0	0	0	0	0	0
480	20192	hypothetical protein	-	-	Q009_RS0107485;-	false	true	9	6	0.87105	0.135073	0.274938	1.13701	-0.869432	-0.560765	6.27317	5.13615	0.1311	0.1377	0	0	0	0	0	0	0	0	0	0	0	0	0	0	0	0	0	1	0	0	0	4	0	0	0	0	0	0	0	0
481	24446	hypothetical protein	-	-	Q009_RS28860;Q009_04320	false	true	9	6	0.87105	0.135073	0.274938	1.13701	-0.869432	-0.560765	6.27317	5.13615	0.1311	0.1377	0	0	0	0	0	0	0	0	0	0	0	0	0	0	0	0	0	1	0	0	0	4	0	0	0	0	0	0	0	0
482	27958	hypothetical protein	-	-	ACP77_RS00010;-	false	true	7	4	0.875014	0.132194	0.17657	1.68204	-0.878787	-0.753082	6.82	5.13796	0.1277	0.0919	0	0	0	0	0	0	0	0	0	0	0	0	0	0	0	0	0	0	1	0	0	0	0	1	0	0	0	0	0	0
483	4700	DNA-binding protein	-	-	Q000_RS14420;Q000_01558	false	true	6	6	0.876978	0.12895	0.294036	1.0933	-0.889579	-0.5316	6.2345	5.1412	0.1276	0.1515	0	0	0	0	0	0	0	0	0	0	1	0	0	0	0	0	0	0	0	0	0	0	0	1	0	0	0	0	0	0
484	8095	hypothetical protein	-	-	NT88_RS30030;-	false	true	1	1	0.884806	0.128664	0.205412	3.06153	-0.890542	-0.687374	8.27	5.20847	0.1536	0.1544	0	0	0	0	0	0	0	0	0	0	0	0	0	0	0	0	0	0	0	0	0	0	0	0	0	0	0	0	0	0
485	12555	hypothetical protein	-	-	NT88_RS14315;-	false	true	1	1	0.884806	0.128664	0.205412	3.06153	-0.890542	-0.687374	8.27	5.20847	0.1536	0.1544	0	0	0	0	0	0	0	0	0	0	0	0	0	0	0	0	0	0	0	0	0	0	0	0	0	0	0	0	0	0
486	21404	transcriptional regulator	-	-	NR39_RS30340;-	false	true	2	2	0.887511	0.121845	0.48056	1.22476	-0.914191	-0.318252	6.445	5.22024	0.1263	0.2331	0	0	0	0	0	0	0	0	0	0	0	0	0	0	0	0	0	0	0	0	0	0	0	0	0	0	0	0	0	0
487	22840	hypothetical protein	-	-	ACP77_RS05695;-	false	true	18	15	0.883311	0.120698	0.24347	0.855874	-0.918299	-0.613555	5.87633	5.02046	0.1183	0.1213	0	0	0	0	0	0	0	0	0	0	0	1	2	1	0	0	0	0	0	2	1	0	0	1	0	1	0	0	0	0
488	15716	hypothetical protein	-	-	NS86_RS11880;-	false	true	3	3	0.888131	0.119518	0.297858	1.48641	-0.922568	-0.525991	6.668	5.18159	0.1161	0.1545	0	0	0	0	0	0	0	0	0	0	0	0	0	0	0	0	0	0	0	0	0	0	1	0	0	0	0	0	0	0
489	23572	hypothetical protein	-	-	Q009_RS39755;Q009_06576	false	true	4	4	0.888597	0.118056	0.179641	1.6704	-0.927911	-0.745594	6.80925	5.13885	0.1169	0.0961	0	0	0	0	0	0	0	0	0	0	0	0	0	0	0	0	0	0	0	0	0	1	0	1	0	0	0	0	0	0
490	21966	hypothetical protein	-	-	Q009_RS27525;Q009_04035	false	true	4	4	0.888597	0.118056	0.163657	1.73269	-0.927911	-0.786065	6.86675	5.13406	0.1185	0.0894	0	0	0	0	0	0	0	0	0	0	0	0	0	0	0	0	0	0	0	1	0	1	0	0	0	0	0	0	0	0
491	13940	hypothetical protein	-	-	NS42_RS22395;-	false	true	6	6	0.888254	0.117288	0.309868	1.05845	-0.930747	-0.508824	6.20367	5.14522	0.1158	0.157	0	0	0	0	0	0	0	0	0	0	0	0	1	0	0	0	0	0	0	1	0	0	0	0	0	0	0	0	0	0
492	4238	integrating conjugative element protein	-	-	ACP77_RS11920;-	false	true	25	22	0.887473	0.116107	0.301394	0.696436	-0.935141	-0.520866	5.66914	4.9727	0.1088	0.1409	0	1	3	0	0	0	0	1	0	0	0	0	1	0	0	0	0	1	1	0	1	0	0	1	0	1	0	1	0	1
493	5791	hypothetical protein	-	-	NS72_RS19325;-	false	true	1	1	0.897242	0.115194	0.170482	3.30929	-0.93857	-0.768321	8.513	5.20371	0.1357	0.137	0	0	0	0	0	0	0	0	0	0	0	0	0	0	0	0	0	0	0	0	0	0	0	0	0	0	0	0	0	0
494	8416	hypothetical protein	-	-	NS72_RS01075;-	false	true	1	1	0.897242	0.115194	0.170482	3.30929	-0.93857	-0.768321	8.513	5.20371	0.1357	0.137	0	0	0	0	0	0	0	0	0	0	0	0	0	0	0	0	0	0	0	0	0	0	0	0	0	0	0	0	0	0
495	10120	head protein	-	-	NS72_RS18860;-	false	true	1	1	0.897242	0.115194	0.170482	3.30929	-0.93857	-0.768321	8.513	5.20371	0.1357	0.137	0	0	0	0	0	0	0	0	0	0	0	0	0	0	0	0	0	0	0	0	0	0	0	0	0	0	0	0	0	0
496	10870	hypothetical protein	-	-	NS72_RS16910;-	false	true	1	1	0.897242	0.115194	0.170482	3.30929	-0.93857	-0.768321	8.513	5.20371	0.1357	0.137	0	0	0	0	0	0	0	0	0	0	0	0	0	0	0	0	0	0	0	0	0	0	0	0	0	0	0	0	0	0
497	18574	hypothetical protein	-	-	NS72_RS22505;-	false	true	1	1	0.897242	0.115194	0.170482	3.30929	-0.93857	-0.768321	8.513	5.20371	0.1357	0.137	0	0	0	0	0	0	0	0	0	0	0	0	0	0	0	0	0	0	0	0	0	0	0	0	0	0	0	0	0	0
498	19823	hypothetical protein	-	-	NS72_RS18870;-	false	true	1	1	0.897242	0.115194	0.170482	3.30929	-0.93857	-0.768321	8.513	5.20371	0.1357	0.137	0	0	0	0	0	0	0	0	0	0	0	0	0	0	0	0	0	0	0	0	0	0	0	0	0	0	0	0	0	0
499	21866	hypothetical protein	-	-	NS72_RS19320;-	false	true	1	1	0.897242	0.115194	0.170482	3.30929	-0.93857	-0.768321	8.513	5.20371	0.1357	0.137	0	0	0	0	0	0	0	0	0	0	0	0	0	0	0	0	0	0	0	0	0	0	0	0	0	0	0	0	0	0
500	22993	hypothetical protein	-	-	NS72_RS18865;-	false	true	1	1	0.897242	0.115194	0.170482	3.30929	-0.93857	-0.768321	8.513	5.20371	0.1357	0.137	0	0	0	0	0	0	0	0	0	0	0	0	0	0	0	0	0	0	0	0	0	0	0	0	0	0	0	0	0	0
501	25449	hypothetical protein	-	-	NS72_RS19710;-	false	true	1	1	0.897242	0.115194	0.170482	3.30929	-0.93857	-0.768321	8.513	5.20371	0.1357	0.137	0	0	0	0	0	0	0	0	0	0	0	0	0	0	0	0	0	0	0	0	0	0	0	0	0	0	0	0	0	0
502	26282	hypothetical protein	-	-	NS72_RS19315;-	false	true	1	1	0.897242	0.115194	0.170482	3.30929	-0.93857	-0.768321	8.513	5.20371	0.1357	0.137	0	0	0	0	0	0	0	0	0	0	0	0	0	0	0	0	0	0	0	0	0	0	0	0	0	0	0	0	0	0
503	23615	transposase	-	-	NT80_RS26820;-	false	true	2	2	0.896342	0.112489	0.224781	2.09732	-0.948888	-0.648241	7.284	5.18668	0.1137	0.1272	0	0	0	0	0	0	0	0	0	0	0	0	0	0	0	0	0	0	0	0	0	0	0	0	0	0	0	0	0	0
504	28087	hypothetical protein	-	-	Q009_RS27540;Q009_04039	false	true	13	12	0.89214	0.111941	0.180598	1.05418	-0.951009	-0.743287	6.07825	5.02407	0.1096	0.0887	0	0	0	0	0	0	0	0	0	2	0	0	1	0	0	0	0	0	0	1	0	1	0	1	0	1	0	0	0	0
505	13542	hypothetical protein	-	-	Q012_RS38490;Q012_06362	false	true	3	3	0.895423	0.111869	0.292656	1.50233	-0.95129	-0.533642	6.683	5.18067	0.1117	0.1526	0	0	0	0	0	0	0	0	0	0	0	0	0	0	0	0	0	0	0	0	0	0	0	0	0	0	0	0	0	1
506	12322	hypothetical protein	-	-	PACI27_RS02235;PACI27_0429	false	true	4	4	0.894978	0.111403	0.194506	1.61596	-0.953103	-0.711067	6.759	5.14304	0.105	0.1025	0	0	0	0	0	0	0	0	0	0	0	0	0	0	0	0	0	1	0	0	0	0	0	0	0	0	0	0	0	0
507	28581	hypothetical protein	-	-	PACI27_RS02240;-	false	true	4	4	0.894978	0.111403	0.194506	1.61596	-0.953103	-0.711067	6.759	5.14304	0.105	0.1025	0	0	0	0	0	0	0	0	0	0	0	0	0	0	0	0	0	1	0	0	0	0	0	0	0	0	0	0	0	0
508	19683	hypothetical protein	-	-	ACP77_RS05670;-	false	true	5	5	0.895648	0.110081	0.121274	1.73819	-0.958288	-0.916232	6.8384	5.10021	0.111	0.0641	0	0	0	0	0	0	0	0	0	1	0	0	0	0	0	0	0	0	0	1	0	0	0	0	0	0	0	0	0	0
509	8834	cell division protein FtsK	-	-	NT56_RS24555;-	false	true	4	4	0.901089	0.105022	0.18399	1.65415	-0.978718	-0.735206	6.79425	5.1401	0.0993	0.0939	0	0	0	0	0	0	0	1	0	0	0	0	0	0	0	0	0	0	0	0	0	0	0	0	0	0	0	0	0	0
510	18083	lysozyme	-	-	NR50_RS01460;-	false	true	2	2	0.904659	0.103658	0.189155	2.2658	-0.984396	-0.723182	7.446	5.1802	0.1058	0.1009	0	0	0	0	0	0	0	0	0	0	0	0	0	0	0	0	0	0	0	0	0	0	0	0	0	0	0	0	0	0
511	22550	transcriptional regulator	-	-	NR40_RS27910;-	false	true	1	1	0.908672	0.102758	0.143718	3.52545	-0.988183	-0.84249	8.725	5.19955	0.1152	0.1172	0	0	0	0	0	0	0	0	0	0	0	0	0	0	0	0	0	0	0	0	0	0	0	0	0	0	0	0	0	0
512	9716	hypothetical protein	-	-	ACP77_RS12130;-	false	true	24	22	0.901003	0.102263	0.255275	0.76577	-0.990282	-0.592991	5.70914	4.94337	0.0962	0.1245	0	1	2	0	0	0	0	1	0	0	0	0	1	0	0	0	0	1	1	0	1	0	0	1	0	1	0	1	0	1
513	17020	integrase	-	-	ACP77_RS12205;-	false	true	24	22	0.901003	0.102263	0.255275	0.76577	-0.990282	-0.592991	5.70914	4.94337	0.0962	0.1245	0	1	2	0	0	0	0	1	0	0	0	0	1	0	0	0	0	1	1	0	1	0	0	1	0	1	0	1	0	1
514	17573	hypothetical protein	-	-	PACIG1_RS05040;PACIG1_0965	false	true	8	8	0.904252	0.100132	0.290557	0.975034	-0.999429	-0.536769	6.09237	5.11734	0.0966	0.14	0	0	0	0	0	0	0	0	0	0	0	0	0	0	0	0	0	1	0	0	1	0	0	1	0	1	0	0	0	0
515	22166	minor tail family protein	-	-	PACIG1_RS05060;-	false	true	8	8	0.904252	0.100132	0.290557	0.975034	-0.999429	-0.536769	6.09237	5.11734	0.0966	0.14	0	0	0	0	0	0	0	0	0	0	0	0	0	0	0	0	0	1	0	0	1	0	0	1	0	1	0	0	0	0
516	22050	bacteriophage protein	-	-	ACP77_RS02910;-	false	true	21	19	0.903495	0.099795	0.134304	1.02917	-1.00089	-0.871912	5.92047	4.8913	0.0988	0.07	0	0	1	0	0	0	0	1	0	1	0	1	1	0	0	0	0	0	0	1	1	0	0	0	0	0	0	2	0	0
517	18287	tail fiber assembly protein	-	-	NT47_RS19015;-	false	true	7	6	0.906172	0.0987161	0.249672	1.19806	-1.00561	-0.60263	6.32717	5.12911	0.0993	0.1257	0	0	0	0	0	0	0	0	1	0	0	0	0	0	0	0	0	0	0	0	0	0	0	0	0	0	0	0	0	0
518	11808	hypothetical protein	-	-	Q000_RS14330;Q000_01535	false	true	5	5	0.909019	0.0961681	0.219473	1.3837	-1.01697	-0.65862	6.518	5.1343	0.0921	0.1114	0	0	0	0	0	0	0	0	0	0	1	0	0	0	0	0	0	0	0	0	0	0	0	0	0	0	0	0	0	0
519	173	hypothetical protein	-	-	NS42_RS31095;-	false	true	2	2	0.912474	0.0953412	0.2283	2.08172	-1.02072	-0.641494	7.269	5.18728	0.1023	0.1332	0	0	0	0	0	0	0	0	0	0	0	0	0	0	0	0	0	0	0	0	0	0	0	0	0	0	0	0	0	0
520	2379	helicase SNF2	-	-	NS42_RS22260;-	false	true	2	2	0.912474	0.0953412	0.2283	2.08172	-1.02072	-0.641494	7.269	5.18728	0.1023	0.1332	0	0	0	0	0	0	0	0	0	0	0	0	0	0	0	0	0	0	0	0	0	0	0	0	0	0	0	0	0	0
521	4937	hypothetical protein	-	-	NS42_RS22255;-	false	true	2	2	0.912474	0.0953412	0.2283	2.08172	-1.02072	-0.641494	7.269	5.18728	0.1023	0.1332	0	0	0	0	0	0	0	0	0	0	0	0	0	0	0	0	0	0	0	0	0	0	0	0	0	0	0	0	0	0
522	7687	hypothetical protein	-	-	NS42_RS17855;-	false	true	2	2	0.912474	0.0953412	0.2283	2.08172	-1.02072	-0.641494	7.269	5.18728	0.1023	0.1332	0	0	0	0	0	0	0	0	0	0	0	0	0	0	0	0	0	0	0	0	0	0	0	0	0	0	0	0	0	0
523	10595	hypothetical protein	-	-	NS42_RS01950;-	false	true	2	2	0.912474	0.0953412	0.2283	2.08172	-1.02072	-0.641494	7.269	5.18728	0.1023	0.1332	0	0	0	0	0	0	0	0	0	0	0	0	0	0	0	0	0	0	0	0	0	0	0	0	0	0	0	0	0	0
524	12728	hypothetical protein	-	-	NS42_RS31255;-	false	true	2	2	0.912474	0.0953412	0.2283	2.08172	-1.02072	-0.641494	7.269	5.18728	0.1023	0.1332	0	0	0	0	0	0	0	0	0	0	0	0	0	0	0	0	0	0	0	0	0	0	0	0	0	0	0	0	0	0
525	17060	tail fiber protein	-	-	NS42_RS31225;-	false	true	2	2	0.912474	0.0953412	0.2283	2.08172	-1.02072	-0.641494	7.269	5.18728	0.1023	0.1332	0	0	0	0	0	0	0	0	0	0	0	0	0	0	0	0	0	0	0	0	0	0	0	0	0	0	0	0	0	0
526	20408	hypothetical protein	-	-	NS42_RS17870;-	false	true	2	2	0.912474	0.0953412	0.2283	2.08172	-1.02072	-0.641494	7.269	5.18728	0.1023	0.1332	0	0	0	0	0	0	0	0	0	0	0	0	0	0	0	0	0	0	0	0	0	0	0	0	0	0	0	0	0	0
527	24982	hypothetical protein	-	-	NS42_RS22285;-	false	true	2	2	0.912474	0.0953412	0.2283	2.08172	-1.02072	-0.641494	7.269	5.18728	0.1023	0.1332	0	0	0	0	0	0	0	0	0	0	0	0	0	0	0	0	0	0	0	0	0	0	0	0	0	0	0	0	0	0
528	25153	hypothetical protein	-	-	NS42_RS17820;-	false	true	2	2	0.912474	0.0953412	0.2283	2.08172	-1.02072	-0.641494	7.269	5.18728	0.1023	0.1332	0	0	0	0	0	0	0	0	0	0	0	0	0	0	0	0	0	0	0	0	0	0	0	0	0	0	0	0	0	0
529	19775	hypothetical protein	-	-	NT41_RS30485;-	false	true	2	2	0.912474	0.0953412	0.217628	2.12956	-1.02072	-0.662286	7.315	5.18544	0.103	0.1277	0	0	0	0	0	0	0	0	0	0	0	0	0	0	0	0	0	0	0	0	0	0	0	0	0	0	0	0	0	0
530	22158	hypothetical protein	-	-	ACP77_RS00700;-	false	true	5	2	0.912474	0.0953412	0.126485	2.62876	-1.02072	-0.897959	7.795	5.16624	0.098	0.0666	0	0	0	0	0	0	0	0	0	0	0	0	0	0	0	0	0	0	0	0	0	0	0	0	0	0	0	0	0	1
531	2558	hypothetical protein	-	-	ACP77_RS11185;-	false	true	14	14	0.908349	0.0950935	0.210912	0.936699	-1.02185	-0.675899	5.95186	5.01516	0.0947	0.1085	0	0	0	0	0	0	0	1	0	0	1	0	0	0	0	0	1	0	0	1	0	0	1	1	0	0	0	0	0	1
532	21549	nucleotide excision repair protein	-	-	NT47_RS10225;-	false	true	6	4	0.912524	0.0930635	0.159862	1.74812	-1.03122	-0.796256	6.881	5.13288	0.0856	0.0838	0	0	0	0	0	0	0	0	0	0	0	0	0	0	0	0	0	1	0	0	0	0	0	0	0	0	0	0	0	0
533	2517	terminase	-	-	Q009_RS28275;Q009_04194	false	true	12	10	0.910959	0.0928405	0.111935	1.333	-1.03226	-0.951034	6.344	5.011	0.0953	0.0599	0	0	0	0	1	0	0	0	1	0	0	0	0	0	0	0	0	0	0	0	0	1	0	0	0	1	0	0	0	0
534	5214	tail protein	-	-	Q009_RS28395;Q009_04218	false	true	12	10	0.910959	0.0928405	0.111935	1.333	-1.03226	-0.951034	6.344	5.011	0.0953	0.0599	0	0	0	0	1	0	0	0	1	0	0	0	0	0	0	0	0	0	0	0	0	1	0	0	0	1	0	0	0	0
535	6474	tail sheath protein	-	-	Q009_RS28370;Q009_04213	false	true	11	10	0.910959	0.0928405	0.111935	1.333	-1.03226	-0.951034	6.344	5.011	0.0953	0.0599	0	0	0	0	1	0	0	0	1	0	0	0	0	0	0	0	0	0	0	0	0	1	0	0	0	1	0	0	0	0
536	8410	phage capsid protein	-	-	Q009_RS28285;Q009_04196	false	true	10	10	0.910959	0.0928405	0.111935	1.333	-1.03226	-0.951034	6.344	5.011	0.0953	0.0599	0	0	0	0	1	0	0	0	1	0	0	0	0	0	0	0	0	0	0	0	0	1	0	0	0	1	0	0	0	0
537	9946	baseplate assembly protein	-	-	Q009_RS28350;Q009_04209	false	true	10	10	0.910959	0.0928405	0.111935	1.333	-1.03226	-0.951034	6.344	5.011	0.0953	0.0599	0	0	0	0	1	0	0	0	1	0	0	0	0	0	0	0	0	0	0	0	0	1	0	0	0	1	0	0	0	0
538	11805	peptidoglycan-binding protein	-	-	Q009_RS28320;Q009_04203	false	true	11	10	0.910959	0.0928405	0.111935	1.333	-1.03226	-0.951034	6.344	5.011	0.0953	0.0599	0	0	0	0	1	0	0	0	1	0	0	0	0	0	0	0	0	0	0	0	0	1	0	0	0	1	0	0	0	0
539	13703	terminase	-	-	Q009_RS28290;Q009_04197	false	true	10	10	0.910959	0.0928405	0.111935	1.333	-1.03226	-0.951034	6.344	5.011	0.0953	0.0599	0	0	0	0	1	0	0	0	1	0	0	0	0	0	0	0	0	0	0	0	0	1	0	0	0	1	0	0	0	0
540	16181	baseplate assembly protein	-	-	Q009_RS28340;Q009_04207	false	true	11	10	0.910959	0.0928405	0.111935	1.333	-1.03226	-0.951034	6.344	5.011	0.0953	0.0599	0	0	0	0	1	0	0	0	1	0	0	0	0	0	0	0	0	0	0	0	0	1	0	0	0	1	0	0	0	0
541	16837	tail fiber protein	-	-	Q009_RS28330;Q009_04205	false	true	10	10	0.910959	0.0928405	0.111935	1.333	-1.03226	-0.951034	6.344	5.011	0.0953	0.0599	0	0	0	0	1	0	0	0	1	0	0	0	0	0	0	0	0	0	0	0	0	1	0	0	0	1	0	0	0	0
542	17354	phage major tail tube protein	-	-	Q009_RS28375;Q009_04214	false	true	11	10	0.910959	0.0928405	0.111935	1.333	-1.03226	-0.951034	6.344	5.011	0.0953	0.0599	0	0	0	0	1	0	0	0	1	0	0	0	0	0	0	0	0	0	0	0	0	1	0	0	0	1	0	0	0	0
543	18365	phage virion morphogenesis protein	-	-	Q009_RS28335;Q009_04206	false	true	11	10	0.910959	0.0928405	0.111935	1.333	-1.03226	-0.951034	6.344	5.011	0.0953	0.0599	0	0	0	0	1	0	0	0	1	0	0	0	0	0	0	0	0	0	0	0	0	1	0	0	0	1	0	0	0	0
544	18675	head completion protein	-	-	Q009_RS28295;Q009_04198	false	true	10	10	0.910959	0.0928405	0.111935	1.333	-1.03226	-0.951034	6.344	5.011	0.0953	0.0599	0	0	0	0	1	0	0	0	1	0	0	0	0	0	0	0	0	0	0	0	0	1	0	0	0	1	0	0	0	0
545	19158	oxidoreductase	-	-	Q009_RS28390;Q009_04217	false	true	12	10	0.910959	0.0928405	0.111935	1.333	-1.03226	-0.951034	6.344	5.011	0.0953	0.0599	0	0	0	0	1	0	0	0	1	0	0	0	0	0	0	0	0	0	0	0	0	1	0	0	0	1	0	0	0	0
546	21645	hypothetical protein	-	-	Q009_RS28310;Q009_04201	false	true	10	10	0.910959	0.0928405	0.111935	1.333	-1.03226	-0.951034	6.344	5.011	0.0953	0.0599	0	0	0	0	1	0	0	0	1	0	0	0	0	0	0	0	0	0	0	0	0	1	0	0	0	1	0	0	0	0
547	21957	phage baseplate protein	-	-	Q009_RS28345;Q009_04208	false	true	10	10	0.910959	0.0928405	0.111935	1.333	-1.03226	-0.951034	6.344	5.011	0.0953	0.0599	0	0	0	0	1	0	0	0	1	0	0	0	0	0	0	0	0	0	0	0	0	1	0	0	0	1	0	0	0	0
548	24529	hypothetical protein	-	-	Q009_RS28315;Q009_04202	false	true	11	10	0.910959	0.0928405	0.111935	1.333	-1.03226	-0.951034	6.344	5.011	0.0953	0.0599	0	0	0	0	1	0	0	0	1	0	0	0	0	0	0	0	0	0	0	0	0	1	0	0	0	1	0	0	0	0
549	27107	tail protein X	-	-	Q009_RS28305;Q009_04200	false	true	10	10	0.910959	0.0928405	0.111935	1.333	-1.03226	-0.951034	6.344	5.011	0.0953	0.0599	0	0	0	0	1	0	0	0	1	0	0	0	0	0	0	0	0	0	0	0	0	1	0	0	0	1	0	0	0	0
550	18	hypothetical protein	-	-	NT80_RS16930;-	false	true	1	1	0.919131	0.091328	0.136629	3.58765	-1.0394	-0.864456	8.786	5.19835	0.0987	0.1028	0	0	0	0	0	0	0	0	0	0	0	0	0	0	0	0	0	0	0	0	0	0	0	0	0	0	0	0	0	0
551	4391	hypothetical protein	-	-	NT80_RS19255;-	false	true	1	1	0.919131	0.091328	0.136629	3.58765	-1.0394	-0.864456	8.786	5.19835	0.0987	0.1028	0	0	0	0	0	0	0	0	0	0	0	0	0	0	0	0	0	0	0	0	0	0	0	0	0	0	0	0	0	0
552	4419	replicative DNA helicase	-	-	NT80_RS30005;-	false	true	1	1	0.919131	0.091328	0.136629	3.58765	-1.0394	-0.864456	8.786	5.19835	0.0987	0.1028	0	0	0	0	0	0	0	0	0	0	0	0	0	0	0	0	0	0	0	0	0	0	0	0	0	0	0	0	0	0
553	5328	terminase	-	-	NT80_RS16830;-	false	true	1	1	0.919131	0.091328	0.136629	3.58765	-1.0394	-0.864456	8.786	5.19835	0.0987	0.1028	0	0	0	0	0	0	0	0	0	0	0	0	0	0	0	0	0	0	0	0	0	0	0	0	0	0	0	0	0	0
554	5860	recombination associated protein	-	-	NT80_RS16725;-	false	true	1	1	0.919131	0.091328	0.136629	3.58765	-1.0394	-0.864456	8.786	5.19835	0.0987	0.1028	0	0	0	0	0	0	0	0	0	0	0	0	0	0	0	0	0	0	0	0	0	0	0	0	0	0	0	0	0	0
555	10578	hypothetical protein	-	-	NT80_RS04555;-	false	true	1	1	0.919131	0.091328	0.136629	3.58765	-1.0394	-0.864456	8.786	5.19835	0.0987	0.1028	0	0	0	0	0	0	0	0	0	0	0	0	0	0	0	0	0	0	0	0	0	0	0	0	0	0	0	0	0	0
556	13813	hypothetical protein	-	-	NT80_RS30010;-	false	true	1	1	0.919131	0.091328	0.136629	3.58765	-1.0394	-0.864456	8.786	5.19835	0.0987	0.1028	0	0	0	0	0	0	0	0	0	0	0	0	0	0	0	0	0	0	0	0	0	0	0	0	0	0	0	0	0	0
557	15736	hypothetical protein	-	-	NT80_RS29915;-	false	true	1	1	0.919131	0.091328	0.136629	3.58765	-1.0394	-0.864456	8.786	5.19835	0.0987	0.1028	0	0	0	0	0	0	0	0	0	0	0	0	0	0	0	0	0	0	0	0	0	0	0	0	0	0	0	0	0	0
558	16370	tail fiber protein	-	-	NT80_RS01655;-	false	true	1	1	0.919131	0.091328	0.136629	3.58765	-1.0394	-0.864456	8.786	5.19835	0.0987	0.1028	0	0	0	0	0	0	0	0	0	0	0	0	0	0	0	0	0	0	0	0	0	0	0	0	0	0	0	0	0	0
559	21277	hypothetical protein	-	-	NT80_RS19265;-	false	true	1	1	0.919131	0.091328	0.136629	3.58765	-1.0394	-0.864456	8.786	5.19835	0.0987	0.1028	0	0	0	0	0	0	0	0	0	0	0	0	0	0	0	0	0	0	0	0	0	0	0	0	0	0	0	0	0	0
560	22945	hypothetical protein	-	-	NT80_RS19190;-	false	true	1	1	0.919131	0.091328	0.136629	3.58765	-1.0394	-0.864456	8.786	5.19835	0.0987	0.1028	0	0	0	0	0	0	0	0	0	0	0	0	0	0	0	0	0	0	0	0	0	0	0	0	0	0	0	0	0	0
561	25030	hypothetical protein	-	-	NT80_RS29985;-	false	true	1	1	0.919131	0.091328	0.136629	3.58765	-1.0394	-0.864456	8.786	5.19835	0.0987	0.1028	0	0	0	0	0	0	0	0	0	0	0	0	0	0	0	0	0	0	0	0	0	0	0	0	0	0	0	0	0	0
562	874	hypothetical protein	-	-	P998_RS0106105;-	false	true	3	3	0.915222	0.0910383	0.255696	1.62118	-1.04078	-0.592276	6.795	5.17382	0.0917	0.1371	0	0	0	0	0	0	0	0	0	0	0	0	0	0	0	0	0	0	0	0	0	0	0	0	0	0	0	0	0	0
563	1000	conjugal transfer protein	-	-	P998_RS35195;P998_05823	false	true	3	3	0.915222	0.0910383	0.255696	1.62118	-1.04078	-0.592276	6.795	5.17382	0.0917	0.1371	0	0	0	0	0	0	0	0	0	0	0	0	0	0	0	0	0	0	0	0	0	0	0	0	0	0	0	0	0	0
564	1374	DNA topoisomerase III	-	-	P998_RS17085;P998_05857	false	true	3	3	0.915222	0.0910383	0.255696	1.62118	-1.04078	-0.592276	6.795	5.17382	0.0917	0.1371	0	0	0	0	0	0	0	0	0	0	0	0	0	0	0	0	0	0	0	0	0	0	0	0	0	0	0	0	0	0
565	1603	hypothetical protein	-	-	P998_RS35275;P998_05841	false	true	3	3	0.915222	0.0910383	0.255696	1.62118	-1.04078	-0.592276	6.795	5.17382	0.0917	0.1371	0	0	0	0	0	0	0	0	0	0	0	0	0	0	0	0	0	0	0	0	0	0	0	0	0	0	0	0	0	0
566	3278	conjugal transfer protein	-	-	P998_RS35245;P998_05834	false	true	3	3	0.915222	0.0910383	0.255696	1.62118	-1.04078	-0.592276	6.795	5.17382	0.0917	0.1371	0	0	0	0	0	0	0	0	0	0	0	0	0	0	0	0	0	0	0	0	0	0	0	0	0	0	0	0	0	0
567	8027	P-type DNA transfer ATPase VirB11	-	-	P998_RS35230;P998_05831	false	true	3	3	0.915222	0.0910383	0.255696	1.62118	-1.04078	-0.592276	6.795	5.17382	0.0917	0.1371	0	0	0	0	0	0	0	0	0	0	0	0	0	0	0	0	0	0	0	0	0	0	0	0	0	0	0	0	0	0
568	11588	conjugal transfer protein	-	-	P998_RS35215;P998_05827	false	true	3	3	0.915222	0.0910383	0.255696	1.62118	-1.04078	-0.592276	6.795	5.17382	0.0917	0.1371	0	0	0	0	0	0	0	0	0	0	0	0	0	0	0	0	0	0	0	0	0	0	0	0	0	0	0	0	0	0
569	11751	conjugal transfer protein	-	-	P998_RS35220;P998_05828	false	true	3	3	0.915222	0.0910383	0.255696	1.62118	-1.04078	-0.592276	6.795	5.17382	0.0917	0.1371	0	0	0	0	0	0	0	0	0	0	0	0	0	0	0	0	0	0	0	0	0	0	0	0	0	0	0	0	0	0
570	14262	P-type DNA transfer protein VirB5	-	-	P998_RS35205;P998_05825	false	true	3	3	0.915222	0.0910383	0.255696	1.62118	-1.04078	-0.592276	6.795	5.17382	0.0917	0.1371	0	0	0	0	0	0	0	0	0	0	0	0	0	0	0	0	0	0	0	0	0	0	0	0	0	0	0	0	0	0
571	14743	hypothetical protein	-	-	P998_RS35240;P998_05833	false	true	3	3	0.915222	0.0910383	0.255696	1.62118	-1.04078	-0.592276	6.795	5.17382	0.0917	0.1371	0	0	0	0	0	0	0	0	0	0	0	0	0	0	0	0	0	0	0	0	0	0	0	0	0	0	0	0	0	0
572	15690	hypothetical protein	-	-	P998_RS35040;P998_05790	false	true	3	3	0.915222	0.0910383	0.255696	1.62118	-1.04078	-0.592276	6.795	5.17382	0.0917	0.1371	0	0	0	0	0	0	0	0	0	0	0	0	0	0	0	0	0	0	0	0	0	0	0	0	0	0	0	0	0	0
573	19822	hypothetical protein	-	-	P998_RS0106540;-	false	true	3	3	0.915222	0.0910383	0.255696	1.62118	-1.04078	-0.592276	6.795	5.17382	0.0917	0.1371	0	0	0	0	0	0	0	0	0	0	0	0	0	0	0	0	0	0	0	0	0	0	0	0	0	0	0	0	0	0
574	22380	hypothetical protein	-	-	P998_RS17075;P998_05855	false	true	3	3	0.915222	0.0910383	0.255696	1.62118	-1.04078	-0.592276	6.795	5.17382	0.0917	0.1371	0	0	0	0	0	0	0	0	0	0	0	0	0	0	0	0	0	0	0	0	0	0	0	0	0	0	0	0	0	0
575	26427	hypothetical protein	-	-	P998_RS35200;P998_05824	false	true	3	3	0.915222	0.0910383	0.255696	1.62118	-1.04078	-0.592276	6.795	5.17382	0.0917	0.1371	0	0	0	0	0	0	0	0	0	0	0	0	0	0	0	0	0	0	0	0	0	0	0	0	0	0	0	0	0	0
576	28084	hypothetical protein	-	-	P998_RS35090;P998_05801	false	true	3	3	0.915222	0.0910383	0.255696	1.62118	-1.04078	-0.592276	6.795	5.17382	0.0917	0.1371	0	0	0	0	0	0	0	0	0	0	0	0	0	0	0	0	0	0	0	0	0	0	0	0	0	0	0	0	0	0
577	21557	transcriptional regulator	-	-	P998_RS35325;P998_05853	false	true	3	3	0.915222	0.0910383	0.24615	1.65373	-1.04078	-0.608799	6.82567	5.17194	0.0912	0.1362	0	0	0	0	0	0	0	0	0	0	0	0	0	0	0	0	0	0	0	0	0	0	0	0	0	0	0	0	0	0
578	1626	transposase	-	-	PACI27_RS02400;PACI27_0458	false	true	5	5	0.913996	0.0909808	0.18259	1.49987	-1.04105	-0.738524	6.623	5.12313	0.0847	0.0948	0	0	0	0	0	0	0	0	0	0	0	0	0	0	0	0	0	1	0	0	0	0	0	0	0	0	0	0	0	0
579	12526	transposase	-	-	PACI27_RS02395;PACI27_0457	false	true	6	5	0.913996	0.0909808	0.18259	1.49987	-1.04105	-0.738524	6.623	5.12313	0.0847	0.0948	0	0	0	0	0	0	0	0	0	0	0	0	0	0	0	0	0	1	0	0	0	0	0	0	0	0	0	0	0	0
580	25475	hypothetical protein	-	-	PACI27_RS02270;PACI27_0434	false	true	6	5	0.913996	0.0909808	0.18259	1.49987	-1.04105	-0.738524	6.623	5.12313	0.0847	0.0948	0	0	0	0	0	0	0	0	0	0	0	0	0	0	0	0	0	1	0	0	0	0	0	0	0	0	0	0	0	0
581	23844	hypothetical protein	-	-	Q000_RS14360;Q000_01543	false	true	7	7	0.914241	0.0900365	0.201353	1.24281	-1.04558	-0.696042	6.34286	5.10004	0.0878	0.1038	0	0	0	0	0	0	0	0	0	0	1	1	0	0	0	0	0	0	0	0	0	0	0	0	0	0	0	0	0	0
582	4726	DNA methyltransferase	-	-	NT80_RS16710;-	false	true	2	2	0.919801	0.0875262	0.189465	2.26424	-1.05786	-0.72247	7.4445	5.18026	0.0922	0.1066	0	0	0	0	0	0	0	0	0	0	0	0	0	0	0	0	0	0	0	0	0	0	0	0	0	0	0	0	0	0
583	19597	hypothetical protein	-	-	P998_RS35120;P998_05808	false	true	3	3	0.921155	0.0847775	0.193363	1.85147	-1.07172	-0.713626	7.012	5.16053	0.0863	0.1072	0	0	0	0	0	0	0	0	0	0	0	0	0	0	0	0	0	0	0	0	0	0	0	0	0	0	0	0	0	0
584	5221	coat protein A of bacteriophage Pf1	-	-	ACP77_RS02760;-	false	true	4	3	0.921155	0.0847775	0.0960522	2.35626	-1.07172	-1.01749	7.48767	5.13141	0.084	0.0546	0	0	0	0	0	0	0	0	0	0	0	0	0	0	0	0	0	0	1	0	0	0	0	0	0	0	0	0	0	0
585	5493	phage-related membrane protein	-	-	ACP77_RS02770;-	false	true	4	3	0.921155	0.0847775	0.0960522	2.35626	-1.07172	-1.01749	7.48767	5.13141	0.084	0.0546	0	0	0	0	0	0	0	0	0	0	0	0	0	0	0	0	0	0	1	0	0	0	0	0	0	0	0	0	0	0
586	21446	hypothetical protein	-	-	ACP77_RS02765;-	false	true	4	3	0.921155	0.0847775	0.0960522	2.35626	-1.07172	-1.01749	7.48767	5.13141	0.084	0.0546	0	0	0	0	0	0	0	0	0	0	0	0	0	0	0	0	0	0	1	0	0	0	0	0	0	0	0	0	0	0
587	26266	membrane protein	-	-	ACP77_RS02750;-	false	true	4	3	0.921155	0.0847775	0.0960522	2.35626	-1.07172	-1.01749	7.48767	5.13141	0.084	0.0546	0	0	0	0	0	0	0	0	0	0	0	0	0	0	0	0	0	0	1	0	0	0	0	0	0	0	0	0	0	0
588	26411	hypothetical protein	-	-	ACP77_RS02745;-	false	true	4	3	0.921155	0.0847775	0.0960522	2.35626	-1.07172	-1.01749	7.48767	5.13141	0.084	0.0546	0	0	0	0	0	0	0	0	0	0	0	0	0	0	0	0	0	0	1	0	0	0	0	0	0	0	0	0	0	0
589	17249	hypothetical protein	-	-	ACP77_RS11440;-	false	true	18	15	0.921302	0.0817064	0.235146	0.870959	-1.08774	-0.628663	5.88707	5.01611	0.0805	0.1175	0	0	0	0	0	0	0	0	0	0	2	0	1	0	0	1	1	0	0	1	0	0	0	1	1	0	0	0	0	0
590	6648	hypothetical protein	-	-	NQ67_RS32095;-	false	true	1	1	0.92866	0.0808686	0.103292	3.918	-1.09222	-0.985933	9.11	5.192	0.0776	0.0812	0	0	0	0	0	0	0	0	0	0	0	0	0	0	0	0	0	0	0	0	0	0	0	0	0	0	0	0	0	0
591	9754	hypothetical protein	-	-	NQ67_RS24790;-	false	true	1	1	0.92866	0.0808686	0.103292	3.918	-1.09222	-0.985933	9.11	5.192	0.0776	0.0812	0	0	0	0	0	0	0	0	0	0	0	0	0	0	0	0	0	0	0	0	0	0	0	0	0	0	0	0	0	0
592	10928	hypothetical protein	-	-	NQ67_RS25505;-	false	true	1	1	0.92866	0.0808686	0.103292	3.918	-1.09222	-0.985933	9.11	5.192	0.0776	0.0812	0	0	0	0	0	0	0	0	0	0	0	0	0	0	0	0	0	0	0	0	0	0	0	0	0	0	0	0	0	0
593	11856	restriction endonuclease subunit M	-	-	NQ67_RS11980;-	false	true	1	1	0.92866	0.0808686	0.103292	3.918	-1.09222	-0.985933	9.11	5.192	0.0776	0.0812	0	0	0	0	0	0	0	0	0	0	0	0	0	0	0	0	0	0	0	0	0	0	0	0	0	0	0	0	0	0
594	13520	hypothetical protein	-	-	NQ67_RS26370;-	false	true	1	1	0.92866	0.0808686	0.103292	3.918	-1.09222	-0.985933	9.11	5.192	0.0776	0.0812	0	0	0	0	0	0	0	0	0	0	0	0	0	0	0	0	0	0	0	0	0	0	0	0	0	0	0	0	0	0
595	22015	hypothetical protein	-	-	NQ67_RS24785;-	false	true	1	1	0.92866	0.0808686	0.103292	3.918	-1.09222	-0.985933	9.11	5.192	0.0776	0.0812	0	0	0	0	0	0	0	0	0	0	0	0	0	0	0	0	0	0	0	0	0	0	0	0	0	0	0	0	0	0
596	25106	lipoprotein	-	-	NQ67_RS11975;-	false	true	1	1	0.92866	0.0808686	0.103292	3.918	-1.09222	-0.985933	9.11	5.192	0.0776	0.0812	0	0	0	0	0	0	0	0	0	0	0	0	0	0	0	0	0	0	0	0	0	0	0	0	0	0	0	0	0	0
597	9267	hypothetical protein	-	-	Q009_RS28750;Q009_04294	false	true	30	22	0.923095	0.0796131	0.0972846	1.10802	-1.09902	-1.01196	5.90659	4.79857	0.0792	0.0524	0	0	1	0	0	0	0	1	0	1	0	1	1	0	0	0	0	1	0	1	1	4	0	0	0	0	0	2	0	0
598	9835	hypothetical protein	-	-	Q009_RS28745;Q009_04293	false	true	28	22	0.923095	0.0796131	0.0972846	1.10802	-1.09902	-1.01196	5.90659	4.79857	0.0792	0.0524	0	0	1	0	0	0	0	1	0	1	0	1	1	0	0	0	0	1	0	1	1	4	0	0	0	0	0	2	0	0
599	17209	lysis protein	-	-	NS42_RS13415;-	false	true	3	3	0.926767	0.0788453	0.229742	1.71174	-1.10322	-0.63876	6.88033	5.16859	0.0798	0.1246	0	0	0	0	0	0	0	0	0	0	0	0	0	0	0	0	0	0	0	0	0	0	0	0	0	0	0	0	0	0
600	4278	integrating conjugative element protein	-	-	ACP77_RS15050;-	false	true	8	7	0.92616	0.0776639	0.139457	1.43348	-1.10978	-0.85556	6.50786	5.07438	0.075	0.0742	0	0	0	0	0	0	0	0	0	0	0	0	0	0	0	0	0	1	0	0	0	0	0	0	0	1	0	0	0	1
601	8066	hypothetical protein	-	-	Q009_RS39745;Q009_06574	false	true	5	4	0.927784	0.0770575	0.0985433	2.04685	-1.11319	-1.00637	7.15675	5.1099	0.0745	0.0571	0	0	0	0	0	0	0	0	0	0	0	0	0	0	0	0	0	0	0	0	0	1	0	0	0	0	0	0	0	1
602	25997	hypothetical protein	-	-	Q009_RS39740;Q009_06573	false	true	7	4	0.927784	0.0770575	0.0985433	2.04685	-1.11319	-1.00637	7.15675	5.1099	0.0745	0.0571	0	0	0	0	0	0	0	0	0	0	0	0	0	0	0	0	0	0	0	0	0	1	0	0	0	0	0	0	0	1
603	30	chemotaxis protein CheA	PA14_RS02190;PA14_05390	PA0413;-	PA14_RS02190;PA14_05390	false	true	49	49	0.932068	0.073233	0.169793	1.95231	-1.13529	-0.77008	5.37998	3.42767	0.0656	0.0733	1	1	1	1	1	1	1	0	1	1	1	1	0	1	1	1	1	1	1	1	0	1	1	1	1	1	1	1	1	1
604	25007	hypothetical protein	-	-	ACP77_RS00005;-	false	true	6	3	0.937069	0.0679315	0.0690115	2.56744	-1.16793	-1.16108	7.68667	5.11922	0.0664	0.0452	0	0	0	0	0	0	0	0	0	0	0	0	0	0	0	0	0	0	1	0	0	0	0	0	0	0	0	0	0	0
605	25716	hypothetical protein	-	-	ACP77_RS15455;-	false	true	2	2	0.939006	0.0669499	0.0899575	2.90904	-1.17425	-1.04596	8.0645	5.15546	0.0667	0.0472	0	0	0	0	0	0	0	0	0	0	0	0	0	0	0	0	0	0	0	0	0	0	0	0	0	0	0	0	0	0
606	2769	phage protein gp28	-	-	ACP77_RS02990;-	false	true	17	16	0.936577	0.0659271	0.1072	1.15316	-1.18094	-0.969805	6.06569	4.91253	0.0626	0.0555	0	0	0	0	0	0	0	1	0	1	0	1	1	0	0	0	0	0	0	1	0	0	0	0	0	0	0	1	0	0
607	177	lambda family phage tail tape measure protein	-	-	PA103_RS30380;PA103_5855	false	true	6	6	0.93903	0.0645021	0.0726739	1.85032	-1.19043	-1.13862	6.90417	5.05385	0.0615	0.0409	0	0	0	0	0	0	0	0	0	1	0	0	0	0	0	0	0	0	0	0	0	0	0	0	0	0	0	1	0	0
608	10386	hypothetical protein	-	-	NS66_RS14515;-	false	true	4	4	0.94485	0.059084	0.207267	1.57154	-1.22853	-0.683469	6.718	5.14646	0.0569	0.1085	0	0	0	0	0	0	0	0	0	0	0	0	0	0	0	0	0	0	0	0	0	0	0	0	1	0	0	0	0	0
609	26428	hypothetical protein	-	-	P998_RS35315;P998_05851	false	true	5	5	0.946748	0.0567036	0.226205	1.36401	-1.24639	-0.645497	6.5002	5.13619	0.0546	0.1188	0	0	0	0	0	0	0	0	0	0	0	0	0	0	0	0	0	0	0	0	0	0	0	1	0	0	0	0	0	0
610	358	tail length tape measure protein	-	-	NR40_RS21280;-	false	true	2	2	0.949669	0.0554604	0.14375	2.51748	-1.25602	-0.842393	7.688	5.17052	0.0526	0.079	0	0	0	0	0	0	0	0	0	0	0	0	0	0	0	0	0	0	0	0	0	0	0	0	0	0	0	0	0	0
611	721	hypothetical protein	-	-	NR40_RS21260;-	false	true	2	2	0.949669	0.0554604	0.14375	2.51748	-1.25602	-0.842393	7.688	5.17052	0.0526	0.079	0	0	0	0	0	0	0	0	0	0	0	0	0	0	0	0	0	0	0	0	0	0	0	0	0	0	0	0	0	0
612	6535	hypothetical protein	-	-	NR40_RS21290;-	false	true	2	2	0.949669	0.0554604	0.14375	2.51748	-1.25602	-0.842393	7.688	5.17052	0.0526	0.079	0	0	0	0	0	0	0	0	0	0	0	0	0	0	0	0	0	0	0	0	0	0	0	0	0	0	0	0	0	0
613	13780	hypothetical protein	-	-	NR40_RS21480;-	false	true	2	2	0.949669	0.0554604	0.14375	2.51748	-1.25602	-0.842393	7.688	5.17052	0.0526	0.079	0	0	0	0	0	0	0	0	0	0	0	0	0	0	0	0	0	0	0	0	0	0	0	0	0	0	0	0	0	0
614	18057	hypothetical protein	-	-	NR40_RS21270;-	false	true	2	2	0.949669	0.0554604	0.14375	2.51748	-1.25602	-0.842393	7.688	5.17052	0.0526	0.079	0	0	0	0	0	0	0	0	0	0	0	0	0	0	0	0	0	0	0	0	0	0	0	0	0	0	0	0	0	0
615	12817	hypothetical protein	-	-	PACI27_RS17405;PACI27_3345	false	true	5	5	0.948409	0.0549566	0.0521324	2.1637	-1.25998	-1.28289	7.223	5.0593	0.0551	0.0308	0	0	0	0	0	0	0	0	0	1	0	0	0	0	0	0	0	0	0	0	0	0	0	0	0	0	0	0	0	0
616	17569	hypothetical protein	-	-	PACI27_RS17400;PACI27_3344	false	true	5	5	0.948409	0.0549566	0.0521324	2.1637	-1.25998	-1.28289	7.223	5.0593	0.0551	0.0308	0	0	0	0	0	0	0	0	0	1	0	0	0	0	0	0	0	0	0	0	0	0	0	0	0	0	0	0	0	0
617	27269	hypothetical protein	-	-	PACI27_RS17410;PACI27_3346	false	true	5	5	0.948409	0.0549566	0.0521324	2.1637	-1.25998	-1.28289	7.223	5.0593	0.0551	0.0308	0	0	0	0	0	0	0	0	0	1	0	0	0	0	0	0	0	0	0	0	0	0	0	0	0	0	0	0	0	0
618	1143	hypothetical protein	-	-	ACP77_RS11140;-	false	true	1	1	0.952121	0.0548941	0.041044	4.87643	-1.26047	-1.38675	10.05	5.17357	0.0208	0.0229	0	0	0	0	0	0	0	0	0	0	0	0	0	0	0	0	0	0	0	0	0	0	0	0	0	0	0	0	0	0
619	5646	hypothetical protein	-	-	ACP77_RS05440;-	false	true	1	1	0.952121	0.0548941	0.041044	4.87643	-1.26047	-1.38675	10.05	5.17357	0.0208	0.0229	0	0	0	0	0	0	0	0	0	0	0	0	0	0	0	0	0	0	0	0	0	0	0	0	0	0	0	0	0	0
620	20189	hypothetical protein	-	-	ACP77_RS11150;-	false	true	1	1	0.952121	0.0548941	0.041044	4.87643	-1.26047	-1.38675	10.05	5.17357	0.0208	0.0229	0	0	0	0	0	0	0	0	0	0	0	0	0	0	0	0	0	0	0	0	0	0	0	0	0	0	0	0	0	0
621	25541	hypothetical protein	-	-	ACP77_RS05450;-	false	true	1	1	0.952121	0.0548941	0.041044	4.87643	-1.26047	-1.38675	10.05	5.17357	0.0208	0.0229	0	0	0	0	0	0	0	0	0	0	0	0	0	0	0	0	0	0	0	0	0	0	0	0	0	0	0	0	0	0
622	12210	hypothetical protein	-	-	ACP77_RS11155;-	false	true	7	6	0.950214	0.0528003	0.124581	1.59013	-1.27736	-0.904549	6.674	5.08387	0.0502	0.0687	0	0	0	0	0	0	0	0	0	0	2	0	0	0	0	0	0	0	0	0	0	0	0	0	0	0	0	0	0	1
623	1959	DNA methyltransferase	-	-	Q009_RS28450;Q009_04232	false	true	6	6	0.950214	0.0528003	0.0546484	1.97636	-1.27736	-1.26242	7.01567	5.0393	0.0497	0.0285	0	0	0	0	0	0	0	0	0	0	0	0	0	0	0	0	0	0	0	0	0	1	0	1	0	1	0	0	0	0
624	24052	hypothetical protein	PA14_RS24145;-	-	PA14_RS24145;-	false	true	15	15	0.953176	0.0488343	0.171301	1.00129	-1.31128	-0.766239	5.9798	4.97851	0.0488	0.0934	0	0	0	1	0	0	0	0	0	0	0	1	0	0	0	0	0	0	0	1	0	0	0	0	1	0	0	0	1	1
625	601	conjugative transfer ATPase, PFL_4706 family	-	-	-	false	true	33	24	0.955239	0.0465204	0.121124	1.02829	-1.33236	-0.916769	5.82104	4.79275	0.044	0.0612	0	1	3	0	0	0	0	1	0	0	0	0	1	0	0	0	0	2	1	0	1	0	0	1	0	2	0	1	0	2
626	1705	DNA topoisomerase III	-	-	ACP77_RS12195;-	false	true	33	24	0.955239	0.0465204	0.121124	1.02829	-1.33236	-0.916769	5.82104	4.79275	0.044	0.0612	0	1	3	0	0	0	0	1	0	0	0	0	1	0	0	0	0	2	1	0	1	0	0	1	0	2	0	1	0	2
627	9338	integrating conjugative element protein	-	-	ACP77_RS11925;-	false	true	33	24	0.955239	0.0465204	0.121124	1.02829	-1.33236	-0.916769	5.82104	4.79275	0.044	0.0612	0	1	3	0	0	0	0	1	0	0	0	0	1	0	0	0	0	2	1	0	1	0	0	1	0	2	0	1	0	2
628	11331	integrating conjugative element protein	-	-	ACP77_RS12210;-	false	true	33	24	0.955239	0.0465204	0.121124	1.02829	-1.33236	-0.916769	5.82104	4.79275	0.044	0.0612	0	1	3	0	0	0	0	1	0	0	0	0	1	0	0	0	0	2	1	0	1	0	0	1	0	2	0	1	0	2
629	20540	hypothetical protein	-	-	ACP77_RS11305;-	false	true	7	7	0.956908	0.0456032	0.0720926	1.73541	-1.34101	-1.14211	6.76914	5.03373	0.0445	0.0403	0	0	0	0	0	0	0	0	0	0	0	0	1	0	0	0	0	0	0	1	0	0	0	0	0	0	0	0	0	1
630	23657	hypothetical protein	-	-	Q009_RS28710;Q009_04286	false	true	22	16	0.957729	0.0440881	0.068624	1.29878	-1.35568	-1.16352	6.1665	4.86772	0.0446	0.0377	0	0	0	0	0	0	0	1	0	1	0	1	0	0	0	0	0	0	0	0	1	4	0	0	0	0	0	2	0	0
631	26812	hypothetical protein	-	-	ACP77_RS15650;-	false	true	16	13	0.960287	0.0415573	0.0981948	1.26087	-1.38135	-1.00791	6.213	4.95213	0.0386	0.0527	0	0	0	0	0	0	0	0	0	0	2	0	1	1	0	0	0	0	0	1	0	0	0	0	0	0	0	1	0	1
632	311	conjugative coupling factor TraD, PFGI-1 class	-	-	-	false	true	33	23	0.964511	0.0369534	0.0967679	1.10385	-1.43235	-1.01427	5.88296	4.7791	0.0347	0.0486	0	1	3	0	0	0	0	1	0	0	0	0	1	0	0	0	0	2	1	0	0	0	0	1	0	2	0	2	0	2
633	1251	DEAD/DEAH box helicase	-	-	ACP77_RS12090;-	false	true	31	22	0.964533	0.0369379	0.086481	1.14442	-1.43253	-1.06308	5.92759	4.78317	0.0356	0.0447	0	1	3	0	0	0	0	1	0	0	0	0	0	0	0	0	0	2	1	0	1	0	0	1	0	2	0	1	0	2
634	18676	peptidase	-	-	Q009_RS28325;Q009_04204	false	true	10	9	0.965171	0.0367319	0.0390168	1.7876	-1.43496	-1.40875	6.74556	4.95795	0.0342	0.0222	0	0	0	0	1	0	0	0	0	0	0	0	0	0	0	0	0	0	0	0	0	1	0	0	0	1	0	0	0	0
635	20974	transcriptional regulator	-	-	ACP77_RS00705;-	false	true	4	3	0.967452	0.0355101	0.0365519	2.93639	-1.44965	-1.43709	8.03433	5.09794	0.0308	0.0231	0	0	0	0	0	0	0	0	0	0	0	0	0	0	0	0	0	0	0	0	0	0	0	0	0	0	0	0	0	1
636	5304	hypothetical protein	-	-	NR40_RS13800;-	false	true	3	3	0.970207	0.0325482	0.132567	2.13482	-1.48747	-0.877564	7.279	5.14418	0.0268	0.0765	0	0	0	0	0	0	0	0	0	0	0	0	0	0	0	0	0	0	0	0	0	0	0	0	0	0	0	0	0	0
637	21696	hypothetical protein	-	-	NT47_RS10135;-	false	true	3	3	0.970207	0.0325482	0.0470908	2.79454	-1.48747	-1.32706	7.90067	5.10612	0.0267	0.0301	0	0	0	0	0	0	0	0	0	0	0	0	0	0	0	0	0	0	0	0	0	0	0	0	0	0	0	0	0	0
638	5365	hypothetical protein	-	-	ACP77_RS07140;-	false	true	8	8	0.969729	0.032052	0.0429354	1.83983	-1.49415	-1.36718	6.82413	4.9843	0.0262	0.0201	0	0	0	0	0	0	0	0	0	1	0	0	0	0	0	0	0	0	0	0	0	0	0	0	0	0	1	0	0	1
639	15651	terminase	-	-	Q000_RS14410;Q000_01556	false	true	8	8	0.970588	0.0311512	0.0853743	1.57244	-1.50653	-1.06867	6.59788	5.02543	0.03	0.0471	0	0	0	0	0	0	0	0	0	0	1	0	0	0	0	0	0	0	0	0	0	0	0	1	0	0	0	0	0	0
640	10436	DNA methyltransferase	-	-	Q009_RS28460;Q009_04235	false	true	17	16	0.970851	0.0304911	0.0670659	1.30591	-1.51583	-1.1735	6.17144	4.86553	0.0277	0.0334	0	0	0	0	0	0	0	0	0	0	2	0	0	0	0	0	1	1	0	0	1	1	0	1	0	0	0	0	0	1
641	25083	hypothetical protein	-	-	Q009_RS27520;Q009_04034	false	true	16	16	0.970851	0.0304911	0.0489475	1.40052	-1.51583	-1.31027	6.23694	4.83642	0.0275	0.0262	0	0	0	0	0	0	0	0	0	0	0	1	0	1	0	0	0	0	0	1	1	1	0	1	0	1	0	0	0	0
642	11104	hypothetical protein	-	-	ACP77_RS02900;-	false	true	12	12	0.974044	0.0272942	0.046411	1.5511	-1.56393	-1.33338	6.4605	4.9094	0.0258	0.0258	0	0	0	0	0	0	0	0	0	0	0	1	1	0	0	0	0	0	0	1	0	0	0	0	0	0	0	1	0	0
643	1111	phage tail tape measure protein	-	-	NS42_RS13430;-	false	true	5	5	0.976516	0.0252592	0.0684033	2.03492	-1.59758	-1.16492	7.1066	5.07168	0.0201	0.0378	0	0	0	0	0	0	0	0	0	0	0	0	0	0	0	0	0	0	0	0	0	0	0	0	0	0	0	0	0	0
644	1683	terminase	-	-	NS42_RS13355;-	false	true	5	5	0.976516	0.0252592	0.0684033	2.03492	-1.59758	-1.16492	7.1066	5.07168	0.0201	0.0378	0	0	0	0	0	0	0	0	0	0	0	0	0	0	0	0	0	0	0	0	0	0	0	0	0	0	0	0	0	0
645	6508	phage protein	-	-	NS42_RS13440;-	false	true	5	5	0.976516	0.0252592	0.0684033	2.03492	-1.59758	-1.16492	7.1066	5.07168	0.0201	0.0378	0	0	0	0	0	0	0	0	0	0	0	0	0	0	0	0	0	0	0	0	0	0	0	0	0	0	0	0	0	0
646	7138	phage tail protein	-	-	NS42_RS13390;-	false	true	5	5	0.976516	0.0252592	0.0684033	2.03492	-1.59758	-1.16492	7.1066	5.07168	0.0201	0.0378	0	0	0	0	0	0	0	0	0	0	0	0	0	0	0	0	0	0	0	0	0	0	0	0	0	0	0	0	0	0
647	9050	hypothetical protein	-	-	NS42_RS13480;-	false	true	5	5	0.976516	0.0252592	0.0684033	2.03492	-1.59758	-1.16492	7.1066	5.07168	0.0201	0.0378	0	0	0	0	0	0	0	0	0	0	0	0	0	0	0	0	0	0	0	0	0	0	0	0	0	0	0	0	0	0
648	9365	capsid scaffolding protein	-	-	NS42_RS13360;-	false	true	5	5	0.976516	0.0252592	0.0684033	2.03492	-1.59758	-1.16492	7.1066	5.07168	0.0201	0.0378	0	0	0	0	0	0	0	0	0	0	0	0	0	0	0	0	0	0	0	0	0	0	0	0	0	0	0	0	0	0
649	9841	hypothetical protein	-	-	NS42_RS13465;-	false	true	5	5	0.976516	0.0252592	0.0684033	2.03492	-1.59758	-1.16492	7.1066	5.07168	0.0201	0.0378	0	0	0	0	0	0	0	0	0	0	0	0	0	0	0	0	0	0	0	0	0	0	0	0	0	0	0	0	0	0
650	13757	hypothetical protein	-	-	NS42_RS13475;-	false	true	5	5	0.976516	0.0252592	0.0684033	2.03492	-1.59758	-1.16492	7.1066	5.07168	0.0201	0.0378	0	0	0	0	0	0	0	0	0	0	0	0	0	0	0	0	0	0	0	0	0	0	0	0	0	0	0	0	0	0
651	14042	virion morphogenesis protein	-	-	NS42_RS13385;-	false	true	5	5	0.976516	0.0252592	0.0684033	2.03492	-1.59758	-1.16492	7.1066	5.07168	0.0201	0.0378	0	0	0	0	0	0	0	0	0	0	0	0	0	0	0	0	0	0	0	0	0	0	0	0	0	0	0	0	0	0
652	16805	DNA-binding protein	-	-	NS42_RS13470;-	false	true	5	5	0.976516	0.0252592	0.0684033	2.03492	-1.59758	-1.16492	7.1066	5.07168	0.0201	0.0378	0	0	0	0	0	0	0	0	0	0	0	0	0	0	0	0	0	0	0	0	0	0	0	0	0	0	0	0	0	0
653	17169	phage tail protein	-	-	NS42_RS13445;-	false	true	5	5	0.976516	0.0252592	0.0684033	2.03492	-1.59758	-1.16492	7.1066	5.07168	0.0201	0.0378	0	0	0	0	0	0	0	0	0	0	0	0	0	0	0	0	0	0	0	0	0	0	0	0	0	0	0	0	0	0
654	18965	tail protein	-	-	NS42_RS13395;-	false	true	5	5	0.976516	0.0252592	0.0684033	2.03492	-1.59758	-1.16492	7.1066	5.07168	0.0201	0.0378	0	0	0	0	0	0	0	0	0	0	0	0	0	0	0	0	0	0	0	0	0	0	0	0	0	0	0	0	0	0
655	19294	tail protein	-	-	NS42_RS13380;-	false	true	5	5	0.976516	0.0252592	0.0684033	2.03492	-1.59758	-1.16492	7.1066	5.07168	0.0201	0.0378	0	0	0	0	0	0	0	0	0	0	0	0	0	0	0	0	0	0	0	0	0	0	0	0	0	0	0	0	0	0
656	20198	hypothetical protein	-	-	NS42_RS13315;-	false	true	5	5	0.976516	0.0252592	0.0684033	2.03492	-1.59758	-1.16492	7.1066	5.07168	0.0201	0.0378	0	0	0	0	0	0	0	0	0	0	0	0	0	0	0	0	0	0	0	0	0	0	0	0	0	0	0	0	0	0
657	22759	phage protein	-	-	NS42_RS13435;-	false	true	5	5	0.976516	0.0252592	0.0684033	2.03492	-1.59758	-1.16492	7.1066	5.07168	0.0201	0.0378	0	0	0	0	0	0	0	0	0	0	0	0	0	0	0	0	0	0	0	0	0	0	0	0	0	0	0	0	0	0
658	23305	hypothetical protein	-	-	NS42_RS13405;-	false	true	5	5	0.976516	0.0252592	0.0684033	2.03492	-1.59758	-1.16492	7.1066	5.07168	0.0201	0.0378	0	0	0	0	0	0	0	0	0	0	0	0	0	0	0	0	0	0	0	0	0	0	0	0	0	0	0	0	0	0
659	27121	conjugal transfer protein TraR	-	-	NS42_RS13400;-	false	true	5	5	0.976516	0.0252592	0.0684033	2.03492	-1.59758	-1.16492	7.1066	5.07168	0.0201	0.0378	0	0	0	0	0	0	0	0	0	0	0	0	0	0	0	0	0	0	0	0	0	0	0	0	0	0	0	0	0	0
660	18678	head protein	-	-	NS42_RS13375;-	false	true	4	4	0.977728	0.0241568	0.0566171	2.35127	-1.61696	-1.24705	7.43775	5.08648	0.0199	0.0343	0	0	0	0	0	0	0	0	0	0	0	0	0	0	0	0	0	0	0	0	0	0	0	0	0	0	0	0	0	0
661	26851	hypothetical protein	-	-	ACP77_RS05445;-	false	true	2	2	0.978429	0.0241488	0.0166877	4.04836	-1.6171	-1.7776	9.16	5.11164	0.0136	0.0122	0	0	0	0	0	0	0	0	0	0	0	0	0	0	0	0	0	0	0	0	0	0	0	0	0	0	0	0	0	0
662	4424	replication initiation protein	-	-	ACP77_RS00015;-	false	true	8	5	0.979753	0.0218149	0.0483751	2.198	-1.66125	-1.31538	7.254	5.056	0.0191	0.0282	0	0	0	0	0	0	0	0	0	0	0	0	0	0	0	0	0	0	0	0	0	0	0	1	0	0	0	0	0	0
663	5161	terminase	-	-	Q000_RS14415;Q000_01557	false	true	7	7	0.980511	0.0207947	0.0572063	1.83149	-1.68205	-1.24256	6.85229	5.0208	0.018	0.0334	0	0	0	0	0	0	0	0	0	0	1	0	0	0	0	0	0	0	0	0	0	0	0	0	0	0	0	0	0	0
664	12625	repressor	-	-	ACP77_RS05515;-	false	true	3	3	0.981241	0.0206339	0.0270159	3.0977	-1.68542	-1.56838	8.18633	5.08863	0.0171	0.0189	0	0	0	0	0	0	0	0	0	0	0	0	0	0	0	0	0	0	0	0	0	0	0	0	0	0	0	0	0	0
665	25873	transcriptional regulator	-	-	ACP77_RS05520;-	false	true	3	3	0.981241	0.0206339	0.0270159	3.0977	-1.68542	-1.56838	8.18633	5.08863	0.0171	0.0189	0	0	0	0	0	0	0	0	0	0	0	0	0	0	0	0	0	0	0	0	0	0	0	0	0	0	0	0	0	0
666	18480	hypothetical protein	-	-	ACP77_RS11170;-	false	true	3	3	0.981241	0.0206339	0.0264876	3.10796	-1.68542	-1.57696	8.196	5.08804	0.0164	0.0191	0	0	0	0	0	0	0	0	0	0	0	0	0	0	0	0	0	0	0	0	0	0	0	0	0	0	0	0	0	0
667	6630	tail protein	PA14_RS03240;PA14_08070	PA0622;-	PA14_RS03240;PA14_08070	false	true	37	35	0.98157	0.0193292	0.0915712	1.18681	-1.71379	-1.03824	5.65534	4.46853	0.0177	0.0422	1	0	0	1	0	0	0	0	1	1	0	1	1	0	0	1	1	1	0	1	1	2	0	1	0	2	1	1	0	1
668	21752	hypothetical protein	-	-	ACP77_RS15640;-	false	true	17	14	0.981869	0.01907	0.0397989	1.51886	-1.71965	-1.40013	6.37729	4.85842	0.0163	0.0199	0	0	0	0	0	0	0	0	0	0	1	0	1	1	0	0	0	0	0	1	0	0	0	0	0	0	0	1	0	1
669	215	phage protein	-	-	Q000_RS14520;Q000_01578	false	true	12	12	0.981954	0.0190317	0.064396	1.44428	-1.72052	-1.19114	6.37833	4.93405	0.0201	0.0362	0	0	0	0	0	0	0	0	0	0	1	0	0	0	0	0	0	0	0	1	1	0	0	1	0	0	0	0	0	0
670	3089	integrase	-	-	NT80_RS04565;-	false	true	5	5	0.982603	0.0187761	0.0632799	2.07254	-1.7264	-1.19873	7.1406	5.06806	0.0161	0.0375	0	0	0	0	0	0	0	0	0	0	0	0	0	0	0	0	0	0	0	0	0	0	0	0	0	1	0	0	0	0
671	2330	DNA methyltransferase	-	-	ACP77_RS11175;-	false	true	4	4	0.984076	0.0173448	0.0288558	2.68033	-1.76083	-1.53977	7.7415	5.06117	0.0126	0.018	0	0	0	0	0	0	0	0	0	0	0	0	0	0	0	0	0	0	0	0	0	0	0	0	0	0	0	0	0	1
672	1309	bacteriophage protein	-	-	ACP77_RS03085;-	false	true	11	11	0.983815	0.0171124	0.0170206	1.90085	-1.76669	-1.76903	6.76609	4.86524	0.0176	0.0123	0	0	0	0	0	0	0	1	0	1	0	0	0	0	0	0	0	0	0	0	0	0	0	0	0	0	0	1	0	0
673	11599	hypothetical protein	-	-	ACP77_RS03075;-	false	true	11	11	0.983815	0.0171124	0.0170206	1.90085	-1.76669	-1.76903	6.76609	4.86524	0.0176	0.0123	0	0	0	0	0	0	0	1	0	1	0	0	0	0	0	0	0	0	0	0	0	0	0	0	0	0	0	1	0	0
674	26265	hypothetical protein	-	-	ACP77_RS03080;-	false	true	12	11	0.983815	0.0171124	0.0170206	1.90085	-1.76669	-1.76903	6.76609	4.86524	0.0176	0.0123	0	0	0	0	0	0	0	1	0	1	0	0	0	0	0	0	0	0	0	0	0	0	0	0	0	0	0	2	0	0
675	14090	hypothetical protein	-	-	ACP77_RS11165;-	false	true	2	2	0.984809	0.017109	0.0103836	4.31668	-1.76677	-1.98365	9.418	5.10132	0.0079	0.0089	0	0	0	0	0	0	0	0	0	0	0	0	0	0	0	0	0	0	0	0	0	0	0	0	0	0	0	0	0	0
676	15466	hypothetical protein	-	-	ACP77_RS00040;-	false	true	11	7	0.984018	0.0170859	0.0532947	1.86004	-1.76736	-1.27332	6.877	5.01696	0.0155	0.0317	0	0	0	0	0	0	0	0	0	0	0	0	0	0	0	0	0	0	0	0	0	0	0	1	0	0	0	0	0	1
677	18463	hypothetical protein	-	-	NT80_RS16675;-	false	true	9	8	0.987602	0.0132362	0.0411038	1.85564	-1.87824	-1.38612	6.8375	4.98186	0.0091	0.0228	0	0	0	0	0	0	0	0	0	0	0	0	0	0	0	0	0	0	0	0	0	0	0	1	0	1	0	0	0	0
678	22360	hypothetical protein	-	-	NS72_RS22340;-	false	true	6	4	0.988804	0.0122458	0.0410235	2.5135	-1.91201	-1.38697	7.5875	5.074	0.0082	0.0239	0	0	0	0	0	0	0	0	0	0	0	0	0	0	0	0	0	0	0	0	0	0	0	0	0	0	0	0	0	0
679	6157	integrase	-	-	Q009_RS28470;Q009_04237	false	true	7	6	0.989436	0.0113913	0.00701353	2.72414	-1.94343	-2.15406	7.67717	4.95302	0.0089	0.0049	0	0	0	0	0	0	0	0	0	0	0	0	0	0	0	0	0	0	0	0	0	1	0	0	0	1	0	0	0	0
680	22299	transcriptional regulator	-	-	NT80_RS04515;-	false	true	4	4	0.990672	0.0102244	0.0351927	2.58744	-1.99036	-1.45355	7.65575	5.06831	0.0073	0.022	0	0	0	0	0	0	0	0	0	0	0	0	0	0	0	0	0	0	0	0	0	0	0	0	0	0	0	0	0	0
681	5222	replication initiation protein	-	-	P998_RS35320;P998_05852	false	true	7	6	0.990936	0.00978883	0.0495813	2.01781	-2.00927	-1.30468	7.05233	5.03452	0.0084	0.0306	0	0	0	0	0	0	0	0	0	0	0	0	0	0	0	0	0	0	0	0	0	0	0	0	0	0	0	0	0	0
682	8274	phage capsid protein	-	-	NT80_RS06595;-	false	true	8	6	0.992246	0.00838688	0.0187424	2.39557	-2.0764	-1.72717	7.3865	4.99093	0.0064	0.0125	0	0	0	0	0	0	0	0	0	0	0	0	0	0	0	0	0	0	0	0	0	0	0	0	0	0	0	0	0	0
683	2756	hypothetical protein	-	-	ACP77_RS03070;-	false	true	11	10	0.995939	0.0043489	0.00376049	2.36012	-2.36162	-2.42476	7.1736	4.81348	0.0038	0.0032	0	0	0	0	0	0	0	0	0	1	0	0	0	0	0	0	0	0	0	0	0	0	0	0	0	0	0	2	0	0
684	5330	zonular occludens toxin	-	-	ACP77_RS00050;-	false	true	15	9	0.996627	0.00362749	0.0139509	2.11049	-2.44039	-1.8554	7.01256	4.90207	0.0026	0.0098	0	0	0	0	0	0	0	0	0	0	0	0	0	0	0	0	0	0	0	0	0	0	0	1	0	0	0	0	0	1
685	10513	hypothetical protein	-	-	ACP77_RS00045;-	false	true	19	9	0.996627	0.00362749	0.0139509	2.11049	-2.44039	-1.8554	7.01256	4.90207	0.0026	0.0098	0	0	0	0	0	0	0	0	0	0	0	0	0	0	0	0	0	0	0	0	0	0	0	1	0	0	0	0	0	1
686	26140	hypothetical protein	-	-	ACP77_RS00035;-	false	true	16	9	0.996627	0.00362749	0.0139509	2.11049	-2.44039	-1.8554	7.01256	4.90207	0.0026	0.0098	0	0	0	0	0	0	0	0	0	0	0	0	0	0	0	0	0	0	0	0	0	0	0	1	0	0	0	0	0	1
687	21386	hypothetical protein	-	-	ACP77_RS00030;-	false	true	14	9	0.997296	0.0029125	0.012082	2.15174	-2.53573	-1.91786	7.04667	4.89493	0.0016	0.0078	0	0	0	0	0	0	0	0	0	0	0	0	0	0	0	0	0	0	0	0	0	0	0	1	0	0	0	0	0	0
688	25128	hypothetical protein	-	-	ACP77_RS00025;-	false	true	14	9	0.997296	0.0029125	0.012082	2.15174	-2.53573	-1.91786	7.04667	4.89493	0.0016	0.0078	0	0	0	0	0	0	0	0	0	0	0	0	0	0	0	0	0	0	0	0	0	0	0	1	0	0	0	0	0	0
[truncated: 22 more columns]
