# Supplementary material for: The Pseudomonas aeruginosa accessory genome elements influence virulence towards Caenorhabditis elegans
Source: Genome Biol. 2019 Dec 10;20:270. doi: 10.1186/s13059-019-1890-1 (PMC6902481; doi:10.1186/s13059-019-1890-1)
Supplement: Supplementary file 9 — Additional file 9: Table S8. Gene clustering analysis for the in silico studied P. aeruginosa strains. Shown are only gene clusters that contain sequences from the studied 52 strains. [file 13059_2019_1890_MOESM9_ESM.xlsx]

## Sheet: Table S8 Gene clustering analysis
Result	Running index of the result
Cluster index	The index of the original CD-HIT cluster
function	Gene function
PA14 gene	PA14 gene, if present in the cluster
PAO1 gene	PAO1 gene, if present in the cluster
Other	Present the first member in the cluster (based on CD-HIT order). Shown is the locus_tag, and old_locus_tag if available
know virulence gene	indicates whether the gene is known as virulence gene
crisprTarget	indicates whether the gene was identified as CRISPR target
numOfOrthologues	Number of orthologues genes present in the clusters (among the 52 strains)
numOfStrains	Number of strains represented in the cluster
MW1	Mann-Whitney p-value for association of gene presence with lower survival
MW2	Mann-Whitney p-value for association of gene presence with higher survival
LR	P-value based on linear regression
Slope	Slope of linear regression
log MW	log10 of the MW1 (for HVA), MW2 (for LVA), Minus indicates association with low virulence
log LR	log10 of the LR, minus indicates association with low virulence
mean SW	Average survival of the strains that have the gene
mean SWO	Average survival of the strains that do not have the gene
P-val logMW	P-value of the logMW score based on permutation test
P-val logLR	P-value of the logLR score based on permutation test
Next 52 columns correspond to presence/absence matrix of the genes in the 52 strains ordered from low survival to high
Result	Cluster index	function	PA14	PAO1	Other	know virulence gene	crisprTarget	numOfOrthologues	numOfStrains	MW1	MW2	LR	Slope	log MW	log LR	mean SW	mean SWO	logMW	logLR	P-val logMW	pval logLR	X5	X40	X51	X28	X2	X17	X48	X16	X4	X43	X41	X45	X31	X12	X1	X13	X20	X37	X8	X32	X29	X38	X9	X3	X6	X25	X30	X44
1	0	non-ribosomal peptide synthetase	-	-	NT05_RS14170;-	false	false	9	8	0.961023	0.0411649	0.215461	1.14034	-1.38547	-0.666631	6.23225	5.09191	-1.38547	-0.666631	0.0409	0.1092	0	0	0	0	0	0	0	0	0	0	0	0	0	0	0	0	0	0	0	0	0	0	0	1	0	1	0	0
2	1	hypothetical protein	PA14_RS13370;PA14_32790	PA2462;-	PA14_RS13370;PA14_32790	false	false	7	7	0.467947	0.542702	0.707392	-0.367867	0.329803	0.15034	4.949	5.31687	0.329803	0.15034	0.4548	0.3594	0	0	0	1	0	0	0	0	0	0	0	0	0	0	0	0	0	1	0	1	0	1	0	0	0	0	0	0
3	2	peptide synthase	-	PA2402;-	PA2402;-	false	false	16	13	0.28414	0.722981	0.568101	-0.440564	0.546468	0.245574	4.93692	5.37749	0.546468	0.245574	0.2786	0.2887	0	0	0	0	2	0	0	0	1	1	0	0	1	2	0	0	0	0	1	0	1	0	0	0	0	0	0	2
4	4	non-ribosomal peptide synthetase	-	-	Q009_RS0106970;-	false	false	17	17	0.122882	0.881041	0.280123	-0.766182	0.910513	0.552652	4.75165	5.51783	0.910513	0.552652	0.117	0.1363	0	1	0	0	0	0	1	1	1	0	1	0	0	0	1	1	0	1	0	1	0	1	1	0	0	0	0	0
5	8	non-ribosomal peptide synthetase	-	-	Q009_RS20225;Q009_02520	false	false	21	21	0.219477	0.785998	0.63035	-0.327917	0.658612	0.200418	5.07186	5.39977	0.658612	0.200418	0.2171	0.3147	0	1	0	0	0	1	1	1	1	0	1	0	0	0	1	1	1	1	0	1	0	1	0	0	1	0	0	0
6	9	hypothetical protein	-	-	NS72_RS29065;-	false	false	1	1	0.897242	0.115194	0.170482	3.30929	-0.93857	-0.768321	8.513	5.20371	-0.93857	-0.768321	0.1357	0.137	0	0	0	0	0	0	0	0	0	0	0	0	0	0	0	0	0	0	0	0	0	0	0	0	0	0	0	0
7	10	non-ribosomal peptide synthetase	PA14_RS13565;PA14_33280	PA2424;-	PA14_RS13565;PA14_33280	false	false	47	47	0.267363	0.742751	0.411904	-0.928536	0.572899	0.385204	5.17806	6.1066	0.572899	0.385204	0.2653	0.2052	1	1	1	1	1	1	1	1	1	1	1	1	0	1	1	1	1	1	1	1	0	1	1	1	0	1	1	1
8	11	hypothetical protein	-	-	Y880_RS30255;-	false	false	1	1	0.937302	0.07134	0.0796457	4.20655	-1.14667	-1.09884	9.393	5.18645	-1.14667	-1.09884	0.0581	0.0638	0	0	0	0	0	0	0	0	0	0	0	0	0	0	0	0	0	0	0	0	0	0	0	0	0	0	0	0
9	12	hypothetical protein	-	-	NT80_RS31420;-	false	false	2	2	0.810653	0.202501	0.357277	1.59552	-0.693573	-0.446995	6.8015	5.20598	-0.693573	-0.446995	0.212	0.1973	0	0	0	0	0	0	0	0	0	0	0	0	0	0	0	0	0	0	0	0	0	0	0	1	0	0	0	0
10	13	hemagglutinin	PA14_RS22575;PA14_55400	-	PA14_RS22575;PA14_55400	true	false	13	13	0.575422	0.432874	0.952126	0.0464103	-0.363639	-0.0213055	5.30215	5.25574	-0.363639	-0.0213055	0.4293	0.4786	0	0	0	1	0	0	0	0	0	0	0	1	0	0	0	0	0	1	0	1	0	1	0	1	0	1	0	1
11	14	hemagglutinin	-	PA0690;-	PA0690;-	true	false	38	38	0.390311	0.617583	0.900304	-0.0945338	0.40859	0.0456107	5.24189	5.33643	0.40859	0.0456107	0.3859	0.4494	1	1	1	0	1	1	1	1	1	1	1	0	1	1	1	1	1	0	1	0	1	0	1	0	1	0	1	0
12	16	hemagglutinin	-	PA0041;-	PA0041;-	false	false	12	11	0.113149	0.891092	0.1888	-1.06776	0.946349	0.723997	4.42545	5.49322	0.946349	0.723997	0.1088	0.0906	1	1	0	0	0	1	0	0	0	0	1	0	0	1	1	0	0	0	0	0	0	0	0	0	1	0	0	0
13	17	hypothetical protein	-	-	Q000_RS19795;Q000_02662	false	true	1	1	0.158784	0.85681	0.307161	-2.47596	0.799192	0.512634	2.839	5.31496	0.799192	0.512634	0.1896	0.1988	0	0	0	0	0	0	0	0	0	0	1	0	0	0	0	0	0	0	0	0	0	0	0	0	0	0	0	0
14	18	hypothetical protein	-	-	NT80_RS16930;-	false	true	1	1	0.919131	0.091328	0.136629	3.58765	-1.0394	-0.864456	8.786	5.19835	-1.0394	-0.864456	0.0987	0.1028	0	0	0	0	0	0	0	0	0	0	0	0	0	0	0	0	0	0	0	0	0	0	0	0	0	0	0	0
15	19	hemagglutinin	-	-	P998_RS15860;P998_01887	false	false	3	2	0.707885	0.308667	0.787194	0.46972	-0.51051	-0.103918	5.719	5.24928	-0.51051	-0.103918	0.3054	0.3924	0	0	0	0	0	0	0	0	0	0	0	0	0	0	0	0	0	0	0	0	0	0	0	0	0	0	0	0
16	23	Ig-like domain repeat protein	PA14_RS16325;PA14_40260	PA1874;-	PA14_RS16325;PA14_40260	false	false	37	34	0.96963	0.0317159	0.0888233	1.17996	-1.49872	-1.05147	5.67579	4.49583	-1.49872	-1.05147	0.0323	0.0443	0	1	0	1	2	0	0	0	1	2	0	0	1	0	1	1	1	1	1	1	0	1	0	1	0	0	0	1
17	24	hypothetical protein	-	-	P998_RS17720;P998_02268	false	false	2	2	0.317094	0.699661	0.557969	-1.018	0.498812	0.25339	4.2885	5.3065	0.498812	0.25339	0.3135	0.3034	0	0	0	0	0	0	0	0	1	0	0	0	0	0	0	0	0	0	0	0	0	0	0	0	0	0	0	0
18	25	glycosyl transferase	-	-	Q000_RS27340;Q000_04216	false	false	5	5	0.0291479	0.972855	0.0525469	-2.16004	1.53539	1.27945	3.315	5.47504	1.53539	1.27945	0.0261	0.0193	0	1	0	0	0	0	0	0	0	0	1	0	1	0	0	1	0	0	0	0	0	0	0	0	0	0	0	0
19	28	hemagglutination activity domain-containing protein	PA14_RS25000;PA14_61200	PA4625;-	PA14_RS25000;PA14_61200	false	false	18	17	0.46115	0.546588	0.917851	0.0735966	0.336158	-0.037228	5.31688	5.24329	0.336158	-0.037228	0.461	0.4503	1	1	1	1	0	1	0	0	0	0	0	0	0	0	1	0	0	1	2	0	0	0	0	0	0	0	0	0
20	29	integrase	-	-	PA103_RS28240;PA103_5457	false	false	21	18	0.281956	0.724505	0.777114	-0.199098	0.549819	0.109515	5.13717	5.33626	0.549819	0.109515	0.2837	0.3972	0	0	2	0	1	1	0	1	0	1	0	0	1	0	1	0	0	0	1	2	0	0	0	1	0	0	0	2
21	30	chemotaxis protein CheA	PA14_RS02190;PA14_05390	PA0413;-	PA14_RS02190;PA14_05390	false	true	49	49	0.932068	0.073233	0.169793	1.95231	-1.13529	-0.77008	5.37998	3.42767	-1.13529	-0.77008	0.0656	0.0733	1	1	1	1	1	1	1	0	1	1	1	1	0	1	1	1	1	1	1	1	0	1	1	1	1	1	1	1
22	32	non-ribosomal peptide synthetase	PA14_RS13715;PA14_33650	PA2399;-	PA14_RS13715;PA14_33650	false	false	11	11	0.790061	0.216453	0.449521	0.618027	-0.664635	-0.34725	5.75464	5.13661	-0.664635	-0.34725	0.2157	0.2266	1	0	0	1	0	0	0	0	0	0	0	0	0	1	0	0	0	0	0	0	0	0	0	0	0	0	0	1
23	33	type I polyketide synthase	-	-	ACP77_RS11520;-	false	false	8	8	0.429543	0.580393	0.841109	-0.185955	0.366993	0.0751476	5.11	5.29595	0.366993	0.0751476	0.419	0.4241	0	0	0	0	0	0	0	0	1	0	1	0	0	1	0	0	0	0	0	0	0	0	0	0	0	0	1	0
24	34	non-ribosomal peptide synthetase	PA14_RS08450;PA14_21020	PA3327;-	PA14_RS08450;PA14_21020	false	false	51	51	0.679542	0.344657	0.628769	1.17698	-0.462613	-0.201509	5.28998	4.113	-0.462613	-0.201509	0.3642	0.3804	1	1	1	1	1	1	1	1	1	1	1	1	1	1	1	1	1	1	1	0	1	1	1	1	1	1	1	1
25	35	hypothetical protein	-	-	NT05_RS12855;-	false	false	1	1	0.446993	0.579218	0.850544	-0.459176	0.349699	0.0703031	4.817	5.27618	0.349699	0.0703031	0.4394	0.4547	0	0	0	0	0	0	0	0	0	0	0	0	0	0	0	0	0	0	0	0	0	0	0	1	0	0	0	0
26	40	DNA helicase	-	-	Q009_RS26690;Q009_03866	false	false	6	6	0.31825	0.691899	0.608577	-0.535841	0.497231	0.215684	4.79333	5.32917	0.497231	0.215684	0.3167	0.3136	0	0	0	0	0	1	0	0	0	0	0	0	0	0	1	0	0	1	0	0	0	1	0	0	0	0	0	0
27	42	non-ribosomal peptide synthetase	PA14_RS13710;PA14_33630	PA2400;-	PA14_RS13710;PA14_33630	false	false	18	18	0.561147	0.446447	0.808464	0.17051	-0.35023	-0.0923395	5.37883	5.20832	-0.35023	-0.0923395	0.4412	0.4063	1	0	1	1	1	0	0	0	0	1	0	1	0	0	0	0	0	0	1	0	0	0	0	0	0	0	0	1
28	44	non-ribosomal peptide synthetase	PA14_RS14185;PA14_34840	PA2302;-	PA14_RS14185;PA14_34840	false	false	42	41	0.42887	0.579908	0.832163	-0.173663	0.367674	0.0797914	5.23061	5.40427	0.367674	0.0797914	0.4178	0.408	1	1	1	1	1	1	1	1	1	1	1	0	0	1	1	1	0	1	1	2	0	1	0	1	1	0	1	0
29	47	histidine kinase	PA14_RS11765;PA14_28895	-	PA14_RS11765;PA14_28895	false	false	46	45	0.230472	0.777597	0.456688	-0.72793	0.637381	0.34038	5.16936	5.89729	0.637381	0.34038	0.2362	0.2309	1	1	1	1	0	1	1	1	0	1	1	1	1	1	1	1	1	1	1	2	1	1	1	1	1	1	1	0
30	48	DEAD/DEAH box helicase	-	-	JF43_RS25860;JF43_26110	false	false	1	1	0.768203	0.252606	0.684151	0.990706	-0.597556	-0.164848	6.239	5.24829	-0.597556	-0.164848	0.2907	0.2932	0	0	0	0	0	0	0	0	0	0	0	0	0	0	0	0	0	0	0	0	0	0	0	0	0	0	0	0
31	51	hypothetical protein	-	-	Q012_RS25935;Q012_03802	false	false	2	2	0.896342	0.112489	0.184953	2.28712	-0.948888	-0.73294	7.4665	5.17938	-0.948888	-0.73294	0.1217	0.1029	0	0	0	0	0	0	0	0	0	0	0	0	0	0	0	0	0	0	0	0	0	0	0	0	0	0	0	0
32	54	hypothetical protein	-	-	NS42_RS25605;-	false	false	2	2	0.912474	0.0953412	0.2283	2.08172	-1.02072	-0.641494	7.269	5.18728	-1.02072	-0.641494	0.1023	0.1332	0	0	0	0	0	0	0	0	0	0	0	0	0	0	0	0	0	0	0	0	0	0	0	0	0	0	0	0
33	56	helicase	-	-	P998_RS14395;P998_01585	false	false	1	1	0.679542	0.344657	0.80835	0.59102	-0.462613	-0.0924004	5.847	5.25598	-0.462613	-0.0924004	0.3711	0.3733	0	0	0	0	0	0	0	0	0	0	0	0	0	0	0	0	0	0	0	0	0	0	0	0	0	0	0	0
34	58	helicase	-	-	Q009_RS21065;Q009_02693	false	false	2	2	0.275988	0.739689	0.51229	-1.13812	0.55911	0.290484	4.173	5.31112	0.55911	0.290484	0.2729	0.2782	0	0	0	0	0	0	0	0	0	0	0	0	0	0	0	0	0	1	0	0	0	1	0	0	0	0	0	0
35	63	non-ribosomal peptide synthetase	PA14_RS03770;PA14_09280	PA4225;-	PA14_RS03770;PA14_09280	false	false	48	48	0.0159243	0.985395	0.0213709	-2.81521	1.79794	1.67018	5.05079	7.866	1.79794	1.67018	0.0121	0.0152	1	1	1	1	1	1	1	1	1	1	1	1	1	1	1	1	1	1	1	1	1	1	1	1	1	1	1	1
36	64	type I polyketide synthase	-	-	PA103_RS15465;PA103_3036	false	false	1	1	0.553007	0.473438	0.985764	0.0434902	-0.324737	-0.00622704	5.31	5.26651	-0.324737	-0.00622704	0.4568	0.4626	0	0	0	0	0	0	0	0	0	0	0	0	0	0	0	0	0	0	0	0	0	0	0	0	0	0	0	1
37	66	hypothetical protein	-	-	P998_RS14400;P998_01589	false	false	4	3	0.747676	0.265019	0.711131	0.531306	-0.576723	-0.148051	5.768	5.23669	-0.576723	-0.148051	0.2685	0.352	0	0	0	0	0	0	0	0	0	0	0	0	0	0	0	0	0	0	0	0	0	0	0	0	0	0	0	0
38	68	hypothetical protein	-	-	NT05_RS31090;-	false	false	1	1	0.446993	0.579218	0.850544	-0.459176	0.349699	0.0703031	4.817	5.27618	0.349699	0.0703031	0.4394	0.4547	0	0	0	0	0	0	0	0	0	0	0	0	0	0	0	0	0	0	0	0	0	0	0	1	0	0	0	0
39	70	hypothetical protein	-	-	L683_RS61680;L683_24680	false	false	1	1	0.0626977	0.945106	0.203929	-3.07141	1.20275	0.690521	2.255	5.32641	1.20275	0.690521	0.0322	0.0355	0	0	1	0	0	0	0	0	0	0	0	0	0	0	0	0	0	0	0	0	0	0	0	0	0	0	0	0
40	71	hypothetical protein	-	-	NS00_RS21195;-	false	false	3	3	0.291347	0.721969	0.483131	-1.00429	0.535589	0.315935	4.321	5.32529	0.535589	0.315935	0.2797	0.2476	0	0	0	0	0	0	0	0	0	0	0	0	0	0	0	1	0	0	0	1	0	0	0	0	0	0	0	0
41	72	protein kinase	-	-	NT11_RS05095;-	false	false	1	1	0.135794	0.878202	0.285721	-2.5871	0.867119	0.544058	2.73	5.3171	0.867119	0.544058	0.1516	0.1608	0	0	0	0	0	0	0	0	1	0	0	0	0	0	0	0	0	0	0	0	0	0	0	0	0	0	0	0
42	80	DEAD/DEAH box helicase	-	-	Q009_RS38990;Q009_06413	false	false	4	4	0.79017	0.219859	0.371937	1.11708	-0.657856	-0.42953	6.2985	5.18142	-0.657856	-0.42953	0.2206	0.1887	0	0	0	0	0	0	0	0	0	0	0	0	0	0	0	0	0	0	0	0	0	1	0	0	0	1	0	0
43	82	DNA repair ATPase	PA14_RS06485;PA14_16190	PA3728;-	PA14_RS06485;PA14_16190	false	false	51	51	0.841216	0.175453	0.370223	2.17518	-0.75584	-0.431536	5.30918	3.134	-0.75584	-0.431536	0.21	0.2256	1	1	1	1	1	1	1	1	1	1	1	0	1	1	1	1	1	1	1	1	1	1	1	1	1	1	1	1
44	83	hypothetical protein	-	-	NS42_RS26105;-	false	false	2	2	0.912474	0.0953412	0.2283	2.08172	-1.02072	-0.641494	7.269	5.18728	-1.02072	-0.641494	0.1023	0.1332	0	0	0	0	0	0	0	0	0	0	0	0	0	0	0	0	0	0	0	0	0	0	0	0	0	0	0	0
45	85	polyketide synthase	-	-	ACP77_RS11525;-	false	false	8	8	0.429543	0.580393	0.841109	-0.185955	0.366993	0.0751476	5.11	5.29595	0.366993	0.0751476	0.419	0.4241	0	0	0	0	0	0	0	0	1	0	1	0	0	1	0	0	0	0	0	0	0	0	0	0	0	0	1	0
46	86	outer membrane autotransporter barrel domain-containing protein	-	-	NS72_RS23075;-	false	false	2	2	0.452653	0.566136	0.894631	0.23052	0.344234	-0.048356	5.489	5.25848	0.344234	-0.048356	0.432	0.4432	0	0	0	0	1	0	0	0	0	0	0	0	0	0	0	0	0	0	0	0	0	0	0	0	0	0	0	0
47	88	helicase	PA14_RS11730;PA14_28810	-	PA14_RS11730;PA14_28810	false	false	7	7	0.574434	0.4361	0.905455	0.116476	-0.360414	-0.043133	5.36814	5.25167	-0.360414	-0.043133	0.4327	0.4439	0	0	0	1	0	0	0	0	0	0	0	1	0	0	0	0	0	0	0	0	0	0	0	0	0	0	1	0
48	89	glycosyl transferase family 1	PA14_RS20415;PA14_50300	PA1091;-	PA14_RS20415;PA14_50300	false	false	29	29	0.734486	0.271589	0.629397	0.324861	-0.566087	-0.201075	5.41103	5.08617	-0.566087	-0.201075	0.2693	0.317	0	0	0	1	1	1	1	1	1	1	1	1	0	0	1	0	1	0	0	0	0	0	1	0	0	1	0	0
49	90	hypothetical protein	-	-	P998_RS14390;P998_01584	false	false	1	1	0.679542	0.344657	0.80835	0.59102	-0.462613	-0.0924004	5.847	5.25598	-0.462613	-0.0924004	0.3711	0.3733	0	0	0	0	0	0	0	0	0	0	0	0	0	0	0	0	0	0	0	0	0	0	0	0	0	0	0	0
50	95	hypothetical protein	-	-	Q009_RS0107870;-	false	false	2	2	0.415223	0.603228	0.7809	-0.48396	0.381718	0.107404	4.802	5.28596	0.381718	0.107404	0.4036	0.4331	0	0	0	0	0	0	0	0	0	0	0	0	0	0	0	0	0	0	0	0	0	1	0	0	0	1	0	0
51	98	hypothetical protein	-	-	NS42_RS22210;-	false	false	2	2	0.912474	0.0953412	0.2283	2.08172	-1.02072	-0.641494	7.269	5.18728	-1.02072	-0.641494	0.1023	0.1332	0	0	0	0	0	0	0	0	0	0	0	0	0	0	0	0	0	0	0	0	0	0	0	0	0	0	0	0
52	103	glutamate dehydrogenase	PA14_RS09910;PA14_24445	PA3068;-	PA14_RS09910;PA14_24445	false	false	50	50	0.342935	0.674383	0.653892	-0.77964	0.464788	0.184494	5.23736	6.017	0.464788	0.184494	0.3243	0.3051	1	1	1	1	1	1	1	1	1	1	1	1	1	1	1	1	0	1	1	1	1	1	1	1	1	1	1	1
53	105	type IV secretion protein Rhs	PA14_RS17510;PA14_43100	-	PA14_RS17510;PA14_43100	false	false	10	10	0.559981	0.449192	0.915882	0.0897048	-0.347568	-0.0381607	5.3398	5.2501	-0.347568	-0.0381607	0.4496	0.4605	0	0	0	1	0	0	0	0	0	0	0	1	1	0	0	0	0	0	0	0	1	0	0	1	0	0	0	0
54	107	hypothetical protein	-	-	NQ81_RS20675;-	false	false	2	2	0.073346	0.93305	0.186852	-2.27744	1.13462	0.728502	3.0775	5.35494	1.13462	0.728502	0.0784	0.0946	0	0	1	0	0	0	0	0	0	0	0	0	0	0	0	0	0	0	1	0	0	0	0	0	0	0	0	0
55	108	hypothetical protein	-	-	NS12_RS21770;-	false	false	2	2	0.292115	0.724012	0.541735	-1.06012	0.534447	0.266213	4.248	5.30812	0.534447	0.266213	0.2928	0.3016	0	0	0	0	0	0	0	0	0	0	0	0	0	1	0	0	0	0	0	0	0	0	0	0	0	0	1	0
56	111	hypothetical protein	PA14_RS23760;PA14_58250	PA4489;-	PA14_RS23760;PA14_58250	false	false	52	52	1	1	1	0	0	0	5.26735	NaN	0	0	0	0	1	1	1	1	1	1	1	1	1	1	1	1	1	1	1	1	1	1	1	1	1	1	1	1	1	1	1	1
57	112	hypothetical protein	-	-	PACIG1_RS30840;PACIG1_5867	false	false	1	1	0.369508	0.655343	0.715611	-0.887412	0.432376	0.145323	4.397	5.28441	0.432376	0.145323	0.3769	0.3771	0	0	0	0	0	0	0	0	0	0	0	0	0	0	0	0	0	0	0	0	1	0	0	0	0	0	0	0
58	114	type II restriction endonuclease	-	-	ACP77_RS31640;-	false	false	2	2	0.912474	0.0953412	0.126485	2.62876	-1.02072	-0.897959	7.795	5.16624	-1.02072	-0.897959	0.098	0.0666	0	0	0	0	0	0	0	0	0	0	0	0	0	0	0	0	0	0	0	0	0	0	0	0	0	0	0	0
59	117	non-ribosomal peptide synthetase	PA14_RS22370;PA14_54920	-	PA14_RS22370;PA14_54920	false	false	4	4	0.219859	0.79017	0.393601	-1.06773	0.657856	0.404943	4.28175	5.34948	0.657856	0.404943	0.2158	0.2015	0	0	0	1	0	0	0	0	0	0	0	1	0	0	0	0	0	0	0	0	0	0	0	0	0	0	0	0
60	119	glutamate synthase large subunit	PA14_RS27165;PA14_66570	PA5036;-	PA14_RS27165;PA14_66570	false	false	52	52	1	1	1	0	0	0	5.26735	NaN	0	0	0	0	1	1	1	1	1	1	1	1	1	1	1	1	1	1	1	1	1	1	1	1	1	1	1	1	1	1	1	1
61	122	cell division protein	-	-	Q012_RS25915;Q012_03798	false	false	1	1	0.605082	0.420782	0.909186	0.278	-0.375943	-0.0413471	5.54	5.262	-0.375943	-0.0413471	0.4281	0.438	0	0	0	0	0	0	0	0	0	0	0	0	0	0	0	0	0	0	0	0	0	0	0	0	0	0	0	0
62	126	helicase	-	-	NR77_RS12825;-	false	false	1	1	0.72564	0.297	0.726497	0.852039	-0.527244	-0.138766	6.103	5.25096	-0.527244	-0.138766	0.3225	0.3241	0	0	0	0	0	0	0	0	0	0	0	0	0	0	0	0	0	0	0	0	0	0	0	0	0	0	0	0
63	128	ATP-dependent DNA helicase	PA14_RS08740;PA14_21690	PA3272;-	PA14_RS08740;PA14_21690	false	false	53	51	0.897242	0.115194	0.278294	2.62686	-0.93857	-0.555496	5.31786	2.691	-0.93857	-0.555496	0.131	0.1435	1	1	1	1	1	1	1	0	1	1	1	1	1	1	1	1	1	1	1	1	1	1	1	1	1	1	1	1
64	130	non-ribosomal peptide synthetase	PA14_RS03765;PA14_09270	PA4226;-	PA14_RS03765;PA14_09270	false	false	51	50	0.216186	0.797499	0.32847	-1.69276	0.665172	0.483504	5.20224	6.895	0.665172	0.483504	0.2199	0.1798	1	1	1	1	1	1	1	1	1	1	1	1	1	1	1	1	1	2	1	1	0	1	1	1	1	1	1	1
65	133	NACHT domain-containing protein	-	-	NT80_RS31175;-	false	false	1	1	0.919131	0.091328	0.136629	3.58765	-1.0394	-0.864456	8.786	5.19835	-1.0394	-0.864456	0.0987	0.1028	0	0	0	0	0	0	0	0	0	0	0	0	0	0	0	0	0	0	0	0	0	0	0	0	0	0	0	0
66	134	exoprotein	PA14_RS24030;PA14_58900	PA4541;-	PA14_RS24030;PA14_58900	false	false	48	48	0.520541	0.49315	0.971516	-0.0448542	-0.307021	0.0125499	5.2639	5.30875	-0.307021	0.0125499	0.4759	0.4769	1	1	1	1	1	1	1	1	1	1	1	1	0	1	1	1	1	1	1	0	1	1	1	0	1	1	1	1
67	136	hypothetical protein	-	-	NT80_RS29765;-	false	false	3	3	0.347357	0.667025	0.831946	-0.304585	0.459225	0.0799051	4.98033	5.28492	0.459225	0.0799051	0.3414	0.4366	0	0	1	0	0	0	0	0	0	0	0	0	0	0	0	0	0	0	1	0	0	0	0	0	0	0	0	0
68	137	GGDEF domain-containing protein	PA14_RS24870;PA14_60870	PA4601;-	PA14_RS24870;PA14_60870	false	false	50	50	0.783814	0.230393	0.486123	1.20936	-0.637531	-0.313254	5.31386	4.1045	-0.637531	-0.313254	0.2271	0.2576	1	1	1	1	1	1	0	1	1	1	1	1	1	1	1	1	1	1	1	1	1	1	1	1	1	1	1	1
69	138	ATPase	PA14_RS04340;PA14_10770	PA4112;-	PA14_RS04340;PA14_10770	false	false	51	51	0.553007	0.473438	0.922567	0.236902	-0.324737	-0.035002	5.2719	5.035	-0.324737	-0.035002	0.463	0.4761	1	1	1	1	1	1	1	1	1	1	1	1	1	1	1	1	1	1	1	1	1	1	1	1	0	1	1	1
70	139	DNA helicase	-	-	PABE173_RS29725;PABE173_5491	false	false	1	1	0.193189	0.824547	0.384173	-2.11298	0.714017	0.415473	3.195	5.30798	0.714017	0.415473	0.2293	0.2301	0	0	0	0	0	0	0	0	0	0	0	0	1	0	0	0	0	0	0	0	0	0	0	0	0	0	0	0
71	141	DNA-directed RNA polymerase subunit beta'	PA14_RS03550;PA14_08780	PA4269;-	PA14_RS03550;PA14_08780	false	false	52	52	1	1	1	0	0	0	5.26735	NaN	0	0	0	0	1	1	1	1	1	1	1	1	1	1	1	1	1	1	1	1	1	1	1	1	1	1	1	1	1	1	1	1
72	143	hypothetical protein	-	-	Q012_RS30845;Q012_04803	false	false	1	1	0.605082	0.420782	0.909186	0.278	-0.375943	-0.0413471	5.54	5.262	-0.375943	-0.0413471	0.4281	0.438	0	0	0	0	0	0	0	0	0	0	0	0	0	0	0	0	0	0	0	0	0	0	0	0	0	0	0	0
73	151	DNA-directed RNA polymerase subunit beta	PA14_RS03545;PA14_08760	PA4270;-	PA14_RS03545;PA14_08760	false	false	52	52	1	1	1	0	0	0	5.26735	NaN	0	0	0	0	1	1	1	1	1	1	1	1	1	1	1	1	1	1	1	1	1	1	1	1	1	1	1	1	1	1	1	1
74	153	XRE family transcriptional regulator	-	-	Q002_RS14280;Q002_01540	false	false	2	2	0.112489	0.896342	0.252053	-1.98052	0.948888	0.598508	3.363	5.34352	0.948888	0.598508	0.119	0.1304	0	1	0	0	0	0	0	0	0	0	0	0	0	0	0	0	0	0	0	0	0	0	0	0	1	0	0	0
75	162	ATP-dependent helicase	PA14_RS08610;PA14_21400	PA3297;-	PA14_RS08610;PA14_21400	false	false	52	52	1	1	1	0	0	0	5.26735	NaN	0	0	0	0	1	1	1	1	1	1	1	1	1	1	1	1	1	1	1	1	1	1	1	1	1	1	1	1	1	1	1	1
76	166	Rhs family protein	PA14_RS11990;PA14_29400	PA2684;-	PA14_RS11990;PA14_29400	false	false	51	51	0.115194	0.897242	0.170482	-3.30929	0.93857	0.768321	5.20371	8.513	0.93857	0.768321	0.1357	0.1393	1	1	1	1	1	1	1	1	1	1	1	1	1	1	1	1	1	1	1	1	1	1	1	1	1	1	1	1
77	169	hypothetical protein	-	-	Q009_RS0107890;-	false	false	6	6	0.259641	0.749556	0.425333	-0.83258	0.585626	0.371271	4.53083	5.36341	0.585626	0.371271	0.2546	0.2194	0	0	0	0	0	0	0	0	0	0	1	0	0	0	0	0	0	1	0	0	0	1	0	1	0	1	0	0
78	171	ATP-binding protein	-	-	Q009_RS18470;Q009_02163	false	false	3	3	0.332975	0.681166	0.596437	-0.759143	0.477589	0.224435	4.552	5.31114	0.477589	0.224435	0.3323	0.3175	0	0	0	0	0	0	0	0	0	0	0	0	0	0	0	0	0	1	0	0	0	1	0	0	0	0	0	1
79	172	phosphoribosylformylglycinamidine synthase	PA14_RS06305;PA14_15740	PA3763;-	PA14_RS06305;PA14_15740	false	false	52	52	1	1	1	0	0	0	5.26735	NaN	0	0	0	0	1	1	1	1	1	1	1	1	1	1	1	1	1	1	1	1	1	1	1	1	1	1	1	1	1	1	1	1
80	173	hypothetical protein	-	-	NS42_RS31095;-	false	true	2	2	0.912474	0.0953412	0.2283	2.08172	-1.02072	-0.641494	7.269	5.18728	-1.02072	-0.641494	0.1023	0.1332	0	0	0	0	0	0	0	0	0	0	0	0	0	0	0	0	0	0	0	0	0	0	0	0	0	0	0	0
81	176	cobaltochelatase subunit CobN	PA14_RS16065;PA14_39640	PA1923;-	PA14_RS16065;PA14_39640	false	false	51	51	0.115194	0.897242	0.170482	-3.30929	0.93857	0.768321	5.20371	8.513	0.93857	0.768321	0.1357	0.1393	1	1	1	1	1	1	1	1	1	1	1	1	1	1	1	1	1	1	1	1	1	1	1	1	1	1	1	1
82	177	lambda family phage tail tape measure protein	-	-	PA103_RS30380;PA103_5855	false	true	6	6	0.93903	0.0645021	0.0726739	1.85032	-1.19043	-1.13862	6.90417	5.05385	-1.19043	-1.13862	0.0615	0.0409	0	0	0	0	0	0	0	0	0	1	0	0	0	0	0	0	0	0	0	0	0	0	0	0	0	0	0	1
83	180	TIGR02099 family protein	PA14_RS23695;PA14_58090	PA4476;-	PA14_RS23695;PA14_58090	false	false	52	52	1	1	1	0	0	0	5.26735	NaN	0	0	0	0	1	1	1	1	1	1	1	1	1	1	1	1	1	1	1	1	1	1	1	1	1	1	1	1	1	1	1	1
84	181	type VI secretion system protein ImpL	PA14_RS13915;PA14_34130	PA2361;-	PA14_RS13915;PA14_34130	true	false	48	48	0.860315	0.147458	0.264841	1.39192	-0.831331	-0.577014	5.37442	3.9825	-0.831331	-0.577014	0.1436	0.1313	1	1	1	1	1	1	1	1	1	1	1	1	0	1	1	1	0	1	1	1	0	1	1	0	1	1	1	1
85	182	glycine dehydrogenase (decarboxylating)	PA14_RS13455;PA14_33000	PA2445;-	PA14_RS13455;PA14_33000	false	false	61	52	1	1	1	0	0	0	5.26735	NaN	0	0	0	0	1	1	1	1	1	1	1	1	1	1	1	1	1	1	1	1	1	2	2	2	1	2	1	1	1	1	1	2
86	186	hypothetical protein	-	-	NR92_RS09615;-	false	false	1	1	0.579218	0.446993	0.963079	0.112824	-0.349699	-0.0163379	5.378	5.26518	-0.349699	-0.0163379	0.4479	0.4509	0	0	0	0	0	0	0	0	0	0	0	0	0	0	0	0	0	0	0	0	0	0	0	0	0	0	0	0
87	187	hypothetical protein	-	-	NT42_RS11935;-	false	false	1	1	0.0478789	0.9584	0.106776	-3.87996	1.31986	0.971528	1.462	5.34196	1.31986	0.971528	0	0.008	1	0	0	0	0	0	0	0	0	0	0	0	0	0	0	0	0	0	0	0	0	0	0	0	0	0	0	0
88	193	nitrate reductase subunit alpha	PA14_RS05545;PA14_13780	PA3875;-	PA14_RS05545;PA14_13780	false	false	52	52	1	1	1	0	0	0	5.26735	NaN	0	0	0	0	1	1	1	1	1	1	1	1	1	1	1	1	1	1	1	1	1	1	1	1	1	1	1	1	1	1	1	1
89	198	non-ribosomal peptide synthetase	PA14_RS14170;PA14_34810	PA2305;-	PA14_RS14170;PA14_34810	false	false	48	48	0.309262	0.702735	0.616401	-0.6285	0.509673	0.210136	5.219	5.8475	0.509673	0.210136	0.3	0.3	1	1	1	1	1	1	1	1	1	1	1	1	1	1	1	1	0	1	1	1	0	1	1	1	1	1	1	1
90	199	diguanylate cyclase	PA14_RS03005;PA14_07500	PA0575;-	PA14_RS03005;PA14_07500	false	false	51	51	0.655343	0.369508	0.715611	0.887412	-0.432376	-0.145323	5.28441	4.397	-0.432376	-0.145323	0.3769	0.3919	1	1	1	1	1	1	1	1	1	1	1	1	1	1	1	1	1	1	1	1	0	1	1	1	1	1	1	1
91	200	cobaltochelatase subunit CobN	PA14_RS10530;PA14_25970	PA2944;-	PA14_RS10530;PA14_25970	false	false	51	51	0.824547	0.193189	0.384173	2.11298	-0.714017	-0.415473	5.30798	3.195	-0.714017	-0.415473	0.2293	0.2438	1	1	1	1	1	1	1	1	1	1	1	1	0	1	1	1	1	1	1	1	1	1	1	1	1	1	1	1
92	201	exodeoxyribonuclease V subunit beta	PA14_RS22720;PA14_55670	PA4284;-	PA14_RS22720;PA14_55670	false	false	52	52	1	1	1	0	0	0	5.26735	NaN	0	0	0	0	1	1	1	1	1	1	1	1	1	1	1	1	1	1	1	1	1	1	1	1	1	1	1	1	1	1	1	1
93	204	hypothetical protein	-	-	Q006_RS16925;Q006_02165	false	false	1	1	0.85681	0.158784	0.407391	2.01235	-0.799192	-0.389988	7.241	5.22865	-0.799192	-0.389988	0.1913	0.1918	0	0	0	0	0	0	0	0	0	0	0	0	0	0	0	0	0	0	0	0	0	0	0	0	0	0	0	0
94	209	host specificity protein	-	-	Q009_RS22160;Q009_02914	false	true	4	4	0.181403	0.827511	0.320445	-1.24188	0.741357	0.494247	4.121	5.36287	0.741357	0.494247	0.1806	0.165	0	0	0	0	0	0	0	0	0	0	0	1	0	1	0	0	0	0	0	0	0	1	0	0	0	0	0	0
95	210	methionine synthase	PA14_RS16490;PA14_40670	PA1843;-	PA14_RS16490;PA14_40670	false	false	52	52	1	1	1	0	0	0	5.26735	NaN	0	0	0	0	1	1	1	1	1	1	1	1	1	1	1	1	1	1	1	1	1	1	1	1	1	1	1	1	1	1	1	1
96	211	phage tail protein	-	-	Q009_RS28755;Q009_04295	false	true	6	3	0.806049	0.204918	0.412598	1.17229	-0.688419	-0.384473	6.372	5.19971	-0.688419	-0.384473	0.202	0.2073	0	0	0	0	0	0	0	0	0	0	0	0	0	0	0	0	0	0	0	0	0	4	0	0	0	0	0	0
97	213	DNA-binding protein	-	-	NT05_RS05360;-	false	false	2	2	0.325617	0.691333	0.586555	-0.9452	0.487293	0.231691	4.3585	5.3037	0.487293	0.231691	0.3183	0.3241	0	0	0	0	0	0	0	0	0	0	0	0	0	0	0	0	0	0	1	0	0	0	0	1	0	0	0	0
98	214	hypothetical protein	-	-	NQ81_RS01855;-	false	false	1	1	0.320458	0.703	0.566684	-1.39416	0.494228	0.246659	3.9	5.29416	0.494228	0.246659	0.3477	0.3494	0	0	0	0	0	0	0	0	0	0	0	0	0	0	0	0	0	0	1	0	0	0	0	0	0	0	0	0
99	215	phage protein	-	-	Q000_RS14520;Q000_01578	false	true	12	12	0.981954	0.0190317	0.064396	1.44428	-1.72052	-1.19114	6.37833	4.93405	-1.72052	-1.19114	0.0201	0.0362	0	0	0	0	0	0	0	0	0	0	1	0	0	0	0	0	0	0	0	1	1	0	0	1	0	0	0	0
100	219	hypothetical protein	PA14_RS12970;PA14_31690	PA2542;-	PA14_RS12970;PA14_31690	false	false	53	51	0.5	0.526562	0.997882	0.00647059	0.30103	-0.000920888	5.26747	5.261	0.30103	-0.000920888	0.4747	0.5209	1	1	1	1	1	1	1	2	1	1	1	1	1	1	1	1	1	1	1	1	1	1	1	1	1	1	0	1
101	221	bacteriophage protein	PA14_RS03330;PA14_08300	PA0641;-	PA14_RS03330;PA14_08300	false	true	26	26	0.142165	0.861911	0.369971	-0.597769	0.847207	0.431833	4.96846	5.56623	0.847207	0.431833	0.1376	0.1817	1	1	1	1	1	1	0	0	0	0	1	1	1	1	0	1	0	0	1	1	1	0	0	0	1	0	0	0
102	225	hybrid sensor histidine kinase/response regulator	PA14_RS05165;PA14_12820	PA3946;-	PA14_RS05165;PA14_12820	false	false	47	47	0.889919	0.116032	0.224721	1.36831	-0.935421	-0.648356	5.39891	4.0306	-0.935421	-0.648356	0.1181	0.114	1	1	1	1	1	1	1	1	1	0	1	1	0	1	1	1	1	1	1	0	1	1	1	1	0	0	1	1
103	227	tail length tape measure protein	-	-	ACP77_RS03055;-	false	true	14	14	0.707709	0.299419	0.619855	0.373887	-0.523721	-0.20771	5.54057	5.16668	-0.523721	-0.20771	0.2939	0.3062	0	0	1	0	0	0	0	1	0	0	0	1	1	0	0	0	0	0	0	1	0	0	0	0	0	0	0	1
104	230	nuclease SbcCD subunit C	PA14_RS22710;PA14_55650	PA4282;-	PA14_RS22710;PA14_55650	false	false	51	51	0.945106	0.0626977	0.203929	3.07141	-1.20275	-0.690521	5.32641	2.255	-1.20275	-0.690521	0.0322	0.0469	1	1	0	1	1	1	1	1	1	1	1	1	1	1	1	1	1	1	1	1	1	1	1	1	1	1	1	1
105	235	membrane protein	PA14_RS27550;PA14_67530	PA5114;-	PA14_RS27550;PA14_67530	false	false	51	51	0.07134	0.937302	0.0796457	-4.20655	1.14667	1.09884	5.18645	9.393	1.14667	1.09884	0.0581	0.0631	1	1	1	1	1	1	1	1	1	1	1	1	1	1	1	1	1	1	1	1	1	1	1	1	1	1	1	1
106	236	two-component sensor	-	-	PABE173_RS05840;PABE173_1098	false	false	1	1	0.193189	0.824547	0.384173	-2.11298	0.714017	0.415473	3.195	5.30798	0.714017	0.415473	0.2293	0.2301	0	0	0	0	0	0	0	0	0	0	0	0	1	0	0	0	0	0	0	0	0	0	0	0	0	0	0	0
107	237	hypothetical protein	-	-	P998_RS0106015;-	false	false	1	1	0.679542	0.344657	0.80835	0.59102	-0.462613	-0.0924004	5.847	5.25598	-0.462613	-0.0924004	0.3711	0.3733	0	0	0	0	0	0	0	0	0	0	0	0	0	0	0	0	0	0	0	0	0	0	0	0	0	0	0	0
108	241	PelB	PA14_RS09920;PA14_24490	PA3063;-	PA14_RS09920;PA14_24490	false	false	52	51	0.526562	0.5	0.937531	0.19102	-0.30103	-0.0280144	5.27102	5.08	-0.30103	-0.0280144	0.4854	0.5014	1	1	1	1	1	1	1	1	1	1	1	1	1	1	1	1	1	1	1	1	1	1	1	1	1	0	1	1
109	243	hypothetical protein	-	-	NT47_RS17375;-	false	false	1	1	0.703	0.320458	0.734059	0.827569	-0.494228	-0.134269	6.079	5.25143	-0.494228	-0.134269	0.34	0.349	0	0	0	0	0	0	0	0	0	0	0	0	0	0	0	0	0	0	0	0	0	0	0	0	0	0	0	0
110	247	Lambda phage tail fiber protein J	-	-	NT80_RS04360;-	false	true	4	4	0.627878	0.385183	0.756814	0.388813	-0.414333	-0.121011	5.62625	5.23744	-0.414333	-0.121011	0.3781	0.3705	0	0	0	0	0	0	0	0	0	0	0	0	0	0	0	0	0	1	0	0	0	0	0	1	0	1	0	0
111	249	hypothetical protein	-	-	NT56_RS22290;-	false	true	11	11	0.473204	0.535708	0.883916	-0.119659	0.324952	0.0535889	5.173	5.29266	0.324952	0.0535889	0.4655	0.4504	0	0	0	0	1	0	1	1	0	0	0	0	0	0	0	1	1	0	0	0	0	0	0	0	1	0	0	0
112	250	hypothetical protein	-	-	NR50_RS27145;-	false	false	1	1	0.655343	0.369508	0.829501	0.524745	-0.432376	-0.0811833	5.782	5.25725	-0.432376	-0.0811833	0.3748	0.3808	0	0	0	0	0	0	0	0	0	0	0	0	0	0	0	0	0	0	0	0	0	0	0	0	0	0	0	0
113	251	type VI secretion protein IcmF	PA14_RS17425;PA14_42900	PA1669;-	PA14_RS17425;PA14_42900	false	false	50	50	0.0609939	0.94454	0.162522	-2.40724	1.21471	0.789088	5.17476	7.582	1.21471	0.789088	0.0584	0.0902	1	1	1	1	1	1	1	1	1	1	1	1	1	1	1	1	1	1	1	1	1	1	1	1	1	1	1	1
114	253	head protein	-	-	Q009_RS28790;Q009_04303	false	true	11	5	0.742751	0.267363	0.586178	0.6172	-0.572899	-0.23197	5.8252	5.208	-0.572899	-0.23197	0.2622	0.2878	0	0	0	0	0	0	0	0	0	0	0	0	0	0	0	0	0	2	0	0	0	4	0	0	0	0	0	0
115	254	type VI secretion protein IcmF	PA14_RS00390;PA14_00910	PA0077;-	PA14_RS00390;PA14_00910	false	false	51	51	0.703	0.320458	0.566684	1.39416	-0.494228	-0.246659	5.29416	3.9	-0.494228	-0.246659	0.3477	0.363	1	1	1	1	1	1	1	1	1	1	1	1	1	1	1	1	1	1	0	1	1	1	1	1	1	1	1	1
116	257	RNA helicase	-	-	NT47_RS12860;-	false	false	1	1	0.703	0.320458	0.734059	0.827569	-0.494228	-0.134269	6.079	5.25143	-0.494228	-0.134269	0.34	0.349	0	0	0	0	0	0	0	0	0	0	0	0	0	0	0	0	0	0	0	0	0	0	0	0	0	0	0	0
117	258	DNA polymerase III subunit alpha	PA14_RS06925;PA14_17260	PA3640;-	PA14_RS06925;PA14_17260	false	false	51	51	0.115194	0.897242	0.170482	-3.30929	0.93857	0.768321	5.20371	8.513	0.93857	0.768321	0.1357	0.1393	1	1	1	1	1	1	1	1	1	1	1	1	1	1	1	1	1	1	1	1	1	1	1	1	1	1	1	1
118	259	hypothetical protein	PA14_RS28335;PA14_69520	-	PA14_RS28335;PA14_69520	false	false	13	13	0.0784023	0.924646	0.133073	-1.14805	1.10567	0.87591	4.40631	5.55436	1.10567	0.87591	0.0799	0.0661	1	0	0	1	0	0	0	0	0	0	1	1	1	0	0	0	0	0	1	1	0	0	0	1	0	0	1	0
119	260	exodeoxyribonuclease V subunit gamma	PA14_RS22725;PA14_55690	PA4285;-	PA14_RS22725;PA14_55690	false	false	51	51	0.252606	0.768203	0.684151	-0.990706	0.597556	0.164848	5.24829	6.239	0.597556	0.164848	0.2907	0.2944	1	1	1	1	1	1	1	1	1	1	1	1	1	1	1	1	1	1	1	1	1	1	1	1	1	1	1	1
120	262	O-antigen biosynthesis protein	-	-	Q009_RS25935;Q009_03691	false	false	23	23	0.271589	0.734486	0.629397	-0.324861	0.566087	0.201075	5.08617	5.41103	0.566087	0.201075	0.2693	0.317	1	1	1	0	0	0	0	0	0	0	0	0	1	1	0	1	0	1	1	1	1	1	0	1	1	0	1	1
121	264	sensor histidine kinase	PA14_RS08745;PA14_21700	PA3271;-	PA14_RS08745;PA14_21700	false	false	52	52	1	1	1	0	0	0	5.26735	NaN	0	0	0	0	1	1	1	1	1	1	1	1	1	1	1	1	1	1	1	1	1	1	1	1	1	1	1	1	1	1	1	1
122	267	type 4 fimbrial biogenesis protein PilY1	-	PA4554;-	PA4554;-	false	false	35	35	0.922785	0.0800782	0.253999	0.808655	-1.09649	-0.595169	5.53171	4.72306	-1.09649	-0.595169	0.0813	0.128	1	1	1	0	0	0	0	0	1	1	1	0	0	1	0	1	0	1	1	1	1	1	0	0	1	1	1	1
123	268	chromosome segregation protein SMC	PA14_RS18170;PA14_44680	PA1527;-	PA14_RS18170;PA14_44680	false	false	51	51	0.320458	0.703	0.734059	-0.827569	0.494228	0.134269	5.25143	6.079	0.494228	0.134269	0.34	0.3433	1	1	1	1	1	1	1	1	1	1	1	1	1	1	1	1	1	1	1	1	1	1	1	1	1	1	1	1
124	269	type IV pilus biogenesis factor PilY1	PA14_RS24625;PA14_60310	-	PA14_RS24625;PA14_60310	false	false	16	16	0.123052	0.880938	0.369479	-0.648243	0.90991	0.43241	4.81856	5.46681	0.90991	0.43241	0.1232	0.1858	0	0	0	1	1	1	1	1	0	0	0	1	0	0	1	0	1	0	0	0	0	0	1	1	0	0	0	0
125	270	type I restriction-modification system endonuclease	-	-	NS00_RS06890;-	false	false	1	1	0.252606	0.768203	0.451335	-1.83055	0.597556	0.345501	3.472	5.30255	0.597556	0.345501	0.2811	0.2835	0	0	0	0	0	0	0	0	0	0	0	0	0	0	0	1	0	0	0	0	0	0	0	0	0	0	0	0
126	272	hypothetical protein	-	-	NS72_RS01110;-	false	false	1	1	0.897242	0.115194	0.170482	3.30929	-0.93857	-0.768321	8.513	5.20371	-0.93857	-0.768321	0.1357	0.137	0	0	0	0	0	0	0	0	0	0	0	0	0	0	0	0	0	0	0	0	0	0	0	0	0	0	0	0
127	275	hypothetical protein	-	-	NT88_RS29575;-	false	false	5	5	0.711826	0.298858	0.600532	0.593745	-0.524535	-0.221464	5.804	5.21026	-0.524535	-0.221464	0.2928	0.2934	0	0	0	0	0	0	0	1	0	0	0	0	0	0	0	0	1	0	0	0	0	0	0	0	0	0	0	0
128	276	hypothetical protein	-	-	NT05_RS21140;-	false	false	2	2	0.182972	0.829371	0.370157	-1.5536	0.737616	0.431614	3.7735	5.3271	0.737616	0.431614	0.1934	0.1959	0	0	0	0	0	0	0	0	0	1	0	0	0	0	0	0	0	0	0	0	0	0	0	1	0	0	0	0
129	279	transcription-repair coupling factor	PA14_RS10230;PA14_25230	PA3002;-	PA14_RS10230;PA14_25230	false	false	52	52	1	1	1	0	0	0	5.26735	NaN	0	0	0	0	1	1	1	1	1	1	1	1	1	1	1	1	1	1	1	1	1	1	1	1	1	1	1	1	1	1	1	1
130	281	hypothetical protein	-	PA2732;-	PA2732;-	false	false	1	1	0.806811	0.211979	0.629571	1.17424	-0.673707	-0.200955	6.419	5.24476	-0.673707	-0.200955	0.2572	0.263	0	0	0	0	0	0	0	0	0	0	0	0	0	0	0	0	0	0	0	0	0	0	0	0	0	0	0	0
131	284	cytochrome c oxidase, cbb3-type subunit I	PA14_RS16425;PA14_40510	PA1695;-	PA1695;-	false	false	101	52	1	1	1	0	0	0	5.26735	NaN	0	0	0	0	2	2	2	2	2	2	2	2	2	2	2	2	2	2	2	2	2	2	2	2	1	2	2	2	2	2	1	2
132	286	SfnB family sulfur acquisition oxidoreductase	PA14_RS13985;PA14_34300	PA2325;-	PA14_RS13985;PA14_34300	false	false	146	50	0.769607	0.245107	0.432952	1.36068	-0.610645	-0.36356	5.31968	3.959	-0.610645	-0.36356	0.2499	0.2342	3	3	3	3	3	3	3	3	3	3	3	3	3	3	3	3	0	3	3	3	0	3	3	3	3	3	2	3
133	293	hypothetical protein	-	-	NR50_RS28695;-	false	false	2	2	0.904659	0.103658	0.189155	2.2658	-0.984396	-0.723182	7.446	5.1802	-0.984396	-0.723182	0.1058	0.1009	0	0	0	0	0	0	0	0	0	0	0	0	0	0	0	0	0	0	0	0	0	0	0	0	0	0	0	0
134	294	phage tail tape measure protein	-	-	Q009_RS0107095;-	false	false	3	3	0.291347	0.721969	0.528479	-0.903116	0.535589	0.276972	4.41633	5.31945	0.535589	0.276972	0.2905	0.2787	0	0	0	0	0	0	0	0	0	0	0	1	0	0	0	0	0	0	0	0	0	1	0	0	0	0	0	0
135	300	hypothetical protein	-	-	ACP77_RS14410;-	false	false	2	2	0.912474	0.0953412	0.126485	2.62876	-1.02072	-0.897959	7.795	5.16624	-1.02072	-0.897959	0.098	0.0666	0	0	0	0	0	0	0	0	0	0	0	0	0	0	0	0	0	0	0	0	0	0	0	0	0	0	0	0
136	303	hypothetical protein	-	-	NR50_RS21090;-	false	false	1	1	0.655343	0.369508	0.829501	0.524745	-0.432376	-0.0811833	5.782	5.25725	-0.432376	-0.0811833	0.3748	0.3808	0	0	0	0	0	0	0	0	0	0	0	0	0	0	0	0	0	0	0	0	0	0	0	0	0	0	0	0
137	304	restriction endonuclease subunit R	-	-	ACP77_RS14465;-	false	false	4	3	0.977335	0.0248617	0.0201111	3.24769	-1.60447	-1.69656	8.32767	5.07998	-1.60447	-1.69656	0.0206	0.0133	0	0	0	0	0	0	0	0	0	0	0	0	0	0	0	0	0	0	0	0	0	0	0	0	0	0	0	0
138	308	ATPase AAA	-	-	NR39_RS08920;-	false	false	1	1	0.841216	0.175453	0.56205	1.41078	-0.75584	-0.250225	6.651	5.24022	-0.75584	-0.250225	0.2068	0.2079	0	0	0	0	0	0	0	0	0	0	0	0	0	0	0	0	0	0	0	0	0	0	0	0	0	0	0	0
139	311	conjugative coupling factor TraD, PFGI-1 class	-	-	-	false	true	33	23	0.964511	0.0369534	0.0967679	1.10385	-1.43235	-1.01427	5.88296	4.7791	-1.43235	-1.01427	0.0347	0.0486	0	1	3	0	0	0	0	1	0	0	0	0	1	0	0	0	0	2	1	0	0	0	0	1	0	2	0	2
140	314	hybrid sensor histidine kinase/response regulator	PA14_RS21275;PA14_52260	PA0927;-	PA14_RS21275;PA14_52260	false	false	101	52	1	1	1	0	0	0	5.26735	NaN	0	0	0	0	2	2	2	2	2	2	2	2	2	2	2	2	2	2	2	2	2	2	2	2	1	2	1	2	2	2	2	2
141	317	diguanylate cyclase/phosphodiesterase	PA14_RS19965;PA14_49160	PA1181;-	PA14_RS19965;PA14_49160	false	false	51	51	0.908672	0.102758	0.274161	2.64929	-0.988183	-0.561994	5.31829	2.669	-0.988183	-0.561994	0.1126	0.1274	1	1	1	1	1	1	0	1	1	1	1	1	1	1	1	1	1	1	1	1	1	1	1	1	1	1	1	1
142	319	potassium transporter KefA	PA14_RS27095;PA14_66400	PA5022;-	PA14_RS27095;PA14_66400	false	false	52	52	1	1	1	0	0	0	5.26735	NaN	0	0	0	0	1	1	1	1	1	1	1	1	1	1	1	1	1	1	1	1	1	1	1	1	1	1	1	1	1	1	1	1
143	320	hypothetical protein	-	-	PA103_RS03310;PA103_0639	false	false	2	1	0.553007	0.473438	0.985764	0.0434902	-0.324737	-0.00622704	5.31	5.26651	-0.324737	-0.00622704	0.4568	0.4626	0	0	0	0	0	0	0	0	0	0	0	0	0	0	0	0	0	0	0	0	0	0	0	0	0	0	0	2
144	321	DNA helicase UvrD	-	-	NS72_RS01050;-	false	false	1	1	0.897242	0.115194	0.170482	3.30929	-0.93857	-0.768321	8.513	5.20371	-0.93857	-0.768321	0.1357	0.137	0	0	0	0	0	0	0	0	0	0	0	0	0	0	0	0	0	0	0	0	0	0	0	0	0	0	0	0
145	323	non-ribosomal peptide synthetase	PA14_RS22375;PA14_54930	-	PA14_RS22375;PA14_54930	false	false	4	4	0.219859	0.79017	0.393601	-1.06773	0.657856	0.404943	4.28175	5.34948	0.657856	0.404943	0.2158	0.2015	0	0	0	1	0	0	0	0	0	0	0	1	0	0	0	0	0	0	0	0	0	0	0	0	0	0	0	0
146	325	filamentous hemagglutinin	-	-	Q012_RS0106935;-	false	false	6	6	0.861792	0.144626	0.267124	1.15548	-0.839754	-0.573287	6.2895	5.13402	-0.839754	-0.573287	0.1389	0.1327	0	0	0	0	0	0	0	0	1	0	0	0	0	0	0	0	0	0	0	0	0	0	0	1	0	0	0	0
147	327	DNA-binding protein	-	-	NR39_RS08905;-	false	false	1	1	0.841216	0.175453	0.56205	1.41078	-0.75584	-0.250225	6.651	5.24022	-0.75584	-0.250225	0.2068	0.2079	0	0	0	0	0	0	0	0	0	0	0	0	0	0	0	0	0	0	0	0	0	0	0	0	0	0	0	0
148	332	hypothetical protein	-	-	NT88_RS29570;-	false	false	5	5	0.711826	0.298858	0.600532	0.593745	-0.524535	-0.221464	5.804	5.21026	-0.524535	-0.221464	0.2928	0.2934	0	0	0	0	0	0	0	1	0	0	0	0	0	0	0	0	1	0	0	0	0	0	0	0	0	0	0	0
149	335	alpha-amylase	PA14_RS14950;PA14_36730	PA2152;-	PA14_RS14950;PA14_36730	false	false	51	51	0.747394	0.27436	0.463851	1.78059	-0.561679	-0.333622	5.30159	3.521	-0.561679	-0.333622	0.3131	0.3295	1	1	1	1	1	1	1	1	1	1	1	1	1	1	1	1	0	1	1	1	1	1	1	1	1	1	1	1
150	338	hypothetical protein	-	-	NS12_RS28265;-	false	false	1	1	0.211979	0.806811	0.393487	-2.0722	0.673707	0.40507	3.235	5.3072	0.673707	0.40507	0.2502	0.2516	0	0	0	0	0	0	0	0	0	0	0	0	0	1	0	0	0	0	0	0	0	0	0	0	0	0	0	0
151	339	hypothetical protein	-	-	Q012_RS26025;-	false	false	1	1	0.605082	0.420782	0.909186	0.278	-0.375943	-0.0413471	5.54	5.262	-0.375943	-0.0413471	0.4281	0.438	0	0	0	0	0	0	0	0	0	0	0	0	0	0	0	0	0	0	0	0	0	0	0	0	0	0	0	0
152	340	hypothetical protein	-	-	NT11_RS26765;-	false	false	1	1	0.135794	0.878202	0.285721	-2.5871	0.867119	0.544058	2.73	5.3171	0.867119	0.544058	0.1516	0.1608	0	0	0	0	0	0	0	0	1	0	0	0	0	0	0	0	0	0	0	0	0	0	0	0	0	0	0	0
153	341	phospholipase	PA14_RS07610;PA14_18970	PA3487;-	PA14_RS07610;PA14_18970	false	false	12	12	0.551841	0.456762	0.963223	-0.0366333	-0.34031	0.0162734	5.23917	5.2758	-0.34031	0.0162734	0.4586	0.4781	0	0	0	1	0	0	0	0	1	0	0	1	0	0	0	0	0	1	0	1	0	1	0	0	0	0	0	0
154	342	RNA helicase	-	-	PACIG1_RS29020;PACIG1_5514	false	false	2	2	0.189347	0.823268	0.377467	-1.5302	0.722742	0.423121	3.796	5.3262	0.722742	0.423121	0.1876	0.1904	0	0	0	0	0	0	0	0	0	0	0	0	1	0	0	0	0	0	0	0	1	0	0	0	0	0	0	0
155	346	ATP synthase	PA14_RS01330;PA14_03270	-	PA14_RS01330;PA14_03270	false	false	13	13	0.722981	0.28414	0.578358	0.428974	-0.546468	-0.237804	5.58908	5.1601	-0.546468	-0.237804	0.2826	0.2863	0	0	0	1	0	0	0	0	0	0	0	1	1	0	0	0	0	1	0	0	1	0	0	0	0	1	0	0
156	347	hypothetical protein	-	-	JF43_RS25865;JF43_26115	false	false	1	1	0.768203	0.252606	0.684151	0.990706	-0.597556	-0.164848	6.239	5.24829	-0.597556	-0.164848	0.2907	0.2932	0	0	0	0	0	0	0	0	0	0	0	0	0	0	0	0	0	0	0	0	0	0	0	0	0	0	0	0
157	348	tape measure domain-containing protein	-	-	NT49_RS21875;-	false	true	10	10	0.640535	0.368183	0.822499	0.190486	-0.433937	-0.0848646	5.4212	5.23071	-0.433937	-0.0848646	0.3637	0.4064	0	0	0	0	1	0	1	0	0	0	0	0	0	0	0	1	1	0	0	0	0	0	0	0	1	0	0	0
158	349	carbamoyl phosphate synthase large subunit	PA14_RS18800;PA14_46320	PA1400;-	PA14_RS18800;PA14_46320	false	false	52	52	1	1	1	0	0	0	5.26735	NaN	0	0	0	0	1	1	1	1	1	1	1	1	1	1	1	1	1	1	1	1	1	1	1	1	1	1	1	1	1	1	1	1
159	351	helicase	-	-	P998_RS33845;P998_05548	false	false	4	4	0.969367	0.0330875	0.149553	1.79146	-1.48034	-0.825204	6.921	5.12954	-1.48034	-0.825204	0.0315	0.0834	0	0	0	0	0	0	0	0	0	0	0	0	0	0	0	0	0	0	0	0	0	0	0	0	0	0	0	0
160	355	tail tape measure protein	-	-	PACIG1_RS05055;PACIG1_0967	false	false	8	8	0.904252	0.100132	0.290557	0.975034	-0.999429	-0.536769	6.09237	5.11734	-0.999429	-0.536769	0.0966	0.14	0	0	0	0	0	0	0	0	0	0	0	0	0	0	0	0	0	1	0	0	1	0	0	1	0	1	0	0
161	356	deoxyribonuclease HsdR	-	-	NQ73_RS14855;-	false	false	1	1	0.5	0.526562	0.937531	-0.19102	0.30103	0.0280144	5.08	5.27102	0.30103	0.0280144	0.4854	0.4917	0	0	0	0	0	0	0	0	0	0	0	0	0	0	0	0	0	0	0	0	0	0	0	0	0	1	0	0
162	358	tail length tape measure protein	-	-	NR40_RS21280;-	false	true	2	2	0.949669	0.0554604	0.14375	2.51748	-1.25602	-0.842393	7.688	5.17052	-1.25602	-0.842393	0.0526	0.079	0	0	0	0	0	0	0	0	0	0	0	0	0	0	0	0	0	0	0	0	0	0	0	0	0	0	0	0
163	361	phage tail tape measure protein	-	-	NS96_RS29205;-	false	false	1	1	0.102758	0.908672	0.274161	-2.64929	0.988183	0.561994	2.669	5.31829	0.988183	0.561994	0.1126	0.1151	0	0	0	0	0	0	1	0	0	0	0	0	0	0	0	0	0	0	0	0	0	0	0	0	0	0	0	0
164	362	DEAD/DEAH box helicase	-	-	Q011_RS32465;Q011_05114	false	false	1	1	0.297	0.72564	0.544685	-1.47369	0.527244	0.263855	3.822	5.29569	0.527244	0.263855	0.3254	0.3299	0	0	0	0	0	0	0	0	0	0	0	0	0	0	0	0	0	1	0	0	0	0	0	0	0	0	0	0
165	363	chromosome segregation protein SMC	-	-	NT47_RS17430;-	false	false	1	1	0.703	0.320458	0.734059	0.827569	-0.494228	-0.134269	6.079	5.25143	-0.494228	-0.134269	0.34	0.349	0	0	0	0	0	0	0	0	0	0	0	0	0	0	0	0	0	0	0	0	0	0	0	0	0	0	0	0
166	364	hypothetical protein	-	PA5265;-	PA5265;-	false	false	39	39	0.950361	0.0518442	0.102774	1.24446	-1.2853	-0.988117	5.57846	4.334	-1.2853	-0.988117	0.0515	0.0504	0	1	0	0	1	1	1	1	1	1	0	0	1	1	1	1	1	1	0	0	1	1	1	0	1	1	0	1
167	365	membrane biogenesis protein	PA14_RS25605;PA14_62650	PA4735;-	PA14_RS25605;PA14_62650	false	false	50	50	0.216186	0.797499	0.398622	-1.46396	0.665172	0.399439	5.21104	6.675	0.665172	0.399439	0.2177	0.2037	1	1	1	1	1	1	1	1	1	1	1	1	1	1	1	1	1	1	1	1	1	1	1	1	1	0	1	1
168	367	type I-F CRISPR-associated helicase Cas3	PA14_RS13595;PA14_33340	-	PA14_RS13595;PA14_33340	false	false	27	27	0.141987	0.862088	0.366433	-0.60261	0.847752	0.436005	4.97763	5.58024	0.847752	0.436005	0.1381	0.1786	0	1	1	1	0	1	0	1	1	0	1	1	0	1	1	1	1	0	1	0	0	0	1	0	1	1	0	0
169	373	hybrid sensor histidine kinase/response regulator	PA14_RS24385;PA14_59780	-	PA14_RS24385;PA14_59780	false	false	4	4	0.219859	0.79017	0.393601	-1.06773	0.657856	0.404943	4.28175	5.34948	0.657856	0.404943	0.2158	0.2015	0	0	0	1	0	0	0	0	0	0	0	1	0	0	0	0	0	0	0	0	0	0	0	0	0	0	0	0
170	375	helicase	-	-	P998_RS24200;P998_03588	false	false	3	3	0.593082	0.422214	0.988197	-0.0212381	-0.374468	0.00515647	5.24733	5.26857	-0.374468	0.00515647	0.411	0.5111	0	0	0	0	0	0	0	0	0	0	0	0	0	0	0	0	0	0	0	1	0	0	0	0	0	0	0	0
171	377	hybrid sensor histidine kinase/response regulator	-	-	Q000_RS27205;Q000_04187	false	false	4	4	0.0205123	0.981128	0.0406212	-2.51831	1.68799	1.39125	2.94275	5.46106	1.68799	1.39125	0.0171	0.0114	0	0	0	0	0	0	0	0	1	1	1	0	0	0	0	1	0	0	0	0	0	0	0	0	0	0	0	0
172	381	hypothetical protein	-	-	Q012_RS09845;Q012_00485	false	false	1	1	0.605082	0.420782	0.909186	0.278	-0.375943	-0.0413471	5.54	5.262	-0.375943	-0.0413471	0.4281	0.438	0	0	0	0	0	0	0	0	0	0	0	0	0	0	0	0	0	0	0	0	0	0	0	0	0	0	0	0
173	382	hypothetical protein	-	-	NT47_RS23055;-	false	false	1	1	0.703	0.320458	0.734059	0.827569	-0.494228	-0.134269	6.079	5.25143	-0.494228	-0.134269	0.34	0.349	0	0	0	0	0	0	0	0	0	0	0	0	0	0	0	0	0	0	0	0	0	0	0	0	0	0	0	0
174	383	tail protein	-	-	NT80_RS29840;-	false	false	5	5	0.95611	0.046851	0.118769	1.74969	-1.32928	-0.925297	6.8488	5.09911	-1.32928	-0.925297	0.047	0.07	0	0	0	0	0	0	0	0	0	0	0	0	0	0	0	0	0	0	0	0	0	0	0	1	0	0	0	0
175	384	helicase	-	-	NR39_RS08995;-	false	false	2	2	0.754893	0.260311	0.720628	0.62208	-0.584507	-0.142289	5.8655	5.24342	-0.584507	-0.142289	0.2526	0.3475	0	0	0	0	0	0	0	0	0	0	0	0	0	0	0	0	0	0	0	0	0	0	0	0	0	1	0	0
176	386	hybrid sensor histidine kinase/response regulator	-	-	NR92_RS13330;-	false	false	1	1	0.579218	0.446993	0.963079	0.112824	-0.349699	-0.0163379	5.378	5.26518	-0.349699	-0.0163379	0.4479	0.4509	0	0	0	0	0	0	0	0	0	0	0	0	0	0	0	0	0	0	0	0	0	0	0	0	0	0	0	0
177	387	hypothetical protein	-	-	NS00_RS01640;-	false	false	1	1	0.252606	0.768203	0.451335	-1.83055	0.597556	0.345501	3.472	5.30255	0.597556	0.345501	0.2811	0.2835	0	0	0	0	0	0	0	0	0	0	0	0	0	0	0	1	0	0	0	0	0	0	0	0	0	0	0	0
178	388	ribonuclease E	PA14_RS10365;PA14_25560	PA2976;-	PA14_RS10365;PA14_25560	false	false	50	50	0.0609939	0.94454	0.123289	-2.6506	1.21471	0.909075	5.1654	7.816	1.21471	0.909075	0.0608	0.0657	1	1	1	1	1	1	1	1	1	1	1	1	1	1	1	1	1	1	1	1	1	1	1	1	1	1	1	1
179	390	carbamoyl-phosphate synthase large chain	PA14_RS25720;PA14_62910	PA4756;-	PA14_RS25720;PA14_62910	false	false	51	51	0.128664	0.884806	0.205412	-3.06153	0.890542	0.687374	5.20847	8.27	0.890542	0.687374	0.1536	0.1582	1	1	1	1	1	1	1	1	1	1	1	1	1	1	1	1	1	1	1	1	1	1	1	1	1	1	1	1
180	391	DNA helicase	-	-	P998_RS14385;P998_01583	false	false	1	1	0.679542	0.344657	0.80835	0.59102	-0.462613	-0.0924004	5.847	5.25598	-0.462613	-0.0924004	0.3711	0.3733	0	0	0	0	0	0	0	0	0	0	0	0	0	0	0	0	0	0	0	0	0	0	0	0	0	0	0	0
181	398	type I restriction endonuclease subunit R	-	-	NT41_RS28555;-	false	false	2	2	0.674383	0.342935	0.843124	0.3444	-0.464788	-0.0741083	5.5985	5.2541	-0.464788	-0.0741083	0.3372	0.4197	0	0	0	0	0	0	0	0	0	0	0	0	0	0	0	0	0	0	0	0	0	0	0	0	0	1	0	0
182	403	hypothetical protein	-	-	Q009_RS32050;Q009_04983	false	false	2	1	0.394918	0.630492	0.755716	-0.757922	0.403493	0.121641	4.524	5.28192	0.403493	0.121641	0.4021	0.4067	0	0	0	0	0	0	0	0	0	0	0	0	0	0	0	0	0	0	0	0	0	2	0	0	0	0	0	0
183	404	resistance-nodulation-cell division (RND) multidrug efflux transporter MexF	PA14_RS13215;PA14_32390	PA2494;-	PA14_RS13215;PA14_32390	false	false	53	52	1	1	1	0	0	0	5.26735	NaN	0	0	0	0	1	1	1	1	1	1	1	1	1	1	1	1	1	1	1	1	1	1	1	1	1	1	1	1	1	1	2	1
184	405	restriction endonuclease	-	-	JF43_RS25870;JF43_26120	false	false	2	2	0.707885	0.308667	0.772964	0.50196	-0.51051	-0.111841	5.75	5.24804	-0.51051	-0.111841	0.3015	0.3761	0	0	0	0	0	0	0	0	0	0	0	0	0	0	0	0	0	0	0	0	0	0	0	0	0	0	1	0
185	407	bifunctional proline dehydrogenase/pyrroline-5-carboxylate dehydrogenase	PA14_RS22050;PA14_54170	PA0782;-	PA14_RS22050;PA14_54170	false	false	52	52	1	1	1	0	0	0	5.26735	NaN	0	0	0	0	1	1	1	1	1	1	1	1	1	1	1	1	1	1	1	1	1	1	1	1	1	1	1	1	1	1	1	1
186	408	DEAD/DEAH box helicase	-	-	NT54_RS20330;-	false	false	2	2	0.0669499	0.939006	0.159818	-2.42252	1.17425	0.796374	2.938	5.36052	1.17425	0.796374	0.0704	0.0765	0	0	0	0	0	1	0	0	0	0	0	0	0	0	1	0	0	0	0	0	0	0	0	0	0	0	0	0
187	409	elongation factor Tu	PA14_RS03505;PA14_08680	PA2071;-	PA14_RS03505;PA14_08680	false	false	160	51	0.655343	0.369508	0.715611	0.887412	-0.432376	-0.145323	5.28441	4.397	-0.432376	-0.145323	0.3769	0.3919	3	4	2	4	2	3	4	3	3	4	4	3	3	4	3	2	4	4	3	3	0	4	3	2	3	3	1	2
188	410	transporter	-	-	NT56_RS25080;-	false	false	3	3	0.304953	0.708653	0.584648	-0.783551	0.515767	0.233105	4.529	5.31255	0.515767	0.233105	0.3028	0.3053	0	0	0	0	0	0	0	1	0	0	0	0	0	0	0	0	0	0	0	0	0	0	0	1	0	0	0	0
189	414	hypothetical protein	-	-	NQ67_RS21865;-	false	false	1	1	0.92866	0.0808686	0.103292	3.918	-1.09222	-0.985933	9.11	5.192	-1.09222	-0.985933	0.0776	0.0812	0	0	0	0	0	0	0	0	0	0	0	0	0	0	0	0	0	0	0	0	0	0	0	0	0	0	0	0
190	415	multidrug efflux RND transporter permease subunit	PA14_RS07525;PA14_18780	PA3522;-	PA14_RS07525;PA14_18780	false	false	52	51	0.655343	0.369508	0.715611	0.887412	-0.432376	-0.145323	5.28441	4.397	-0.432376	-0.145323	0.3769	0.3919	1	1	2	1	1	1	1	1	1	1	1	1	1	1	1	1	1	1	1	1	0	1	1	1	1	1	1	1
191	422	cation transporter	-	-	ACP77_RS11650;-	false	false	16	16	0.60552	0.402131	0.833788	0.15216	-0.395632	-0.0789445	5.37269	5.22053	-0.395632	-0.0789445	0.4054	0.4208	0	0	0	0	0	0	0	1	0	0	0	1	1	0	0	0	0	1	1	1	1	0	0	1	0	0	0	1
192	423	multidrug efflux RND transporter permease subunit	-	-	NT05_RS21470;-	false	false	1	1	0.446993	0.579218	0.850544	-0.459176	0.349699	0.0703031	4.817	5.27618	0.349699	0.0703031	0.4394	0.4547	0	0	0	0	0	0	0	0	0	0	0	0	0	0	0	0	0	0	0	0	0	0	0	1	0	0	0	0
193	429	phosphoribosylamine--glycine ligase	PA14_RS26240;PA14_64220	PA4855;-	PA14_RS26240;PA14_64220	false	false	101	52	1	1	1	0	0	0	5.26735	NaN	0	0	0	0	2	2	2	2	2	2	2	2	2	2	2	2	2	2	2	2	2	2	2	2	2	2	2	2	2	2	1	2
194	430	resistance-nodulation-cell division (RND) divalent metal cation efflux transporter CzcA	-	PA2520;-	PA2520;-	false	false	51	51	0.937302	0.07134	0.208544	3.04082	-1.14667	-0.680802	5.32582	2.285	-1.14667	-0.680802	0.0594	0.0729	1	1	1	0	1	1	1	1	1	1	1	1	1	1	1	1	1	1	1	1	1	1	1	1	1	1	1	1
195	434	multidrug efflux RND transporter permease subunit	PA14_RS15610;PA14_38410	PA2018;-	PA14_RS15610;PA14_38410	false	false	51	51	0.679542	0.344657	0.628769	1.17698	-0.462613	-0.201509	5.28998	4.113	-0.462613	-0.201509	0.3642	0.3804	1	1	1	1	1	1	1	1	1	1	1	1	1	1	1	1	1	1	1	0	1	1	1	1	1	1	1	1
196	435	multidrug transporter AcrB	-	-	L683_RS64010;L683_26740	false	false	1	1	0.0626977	0.945106	0.203929	-3.07141	1.20275	0.690521	2.255	5.32641	1.20275	0.690521	0.0322	0.0355	0	0	1	0	0	0	0	0	0	0	0	0	0	0	0	0	0	0	0	0	0	0	0	0	0	0	0	0
197	437	multidrug efflux RND transporter permease subunit	PA14_RS02255;PA14_05540	PA0426;-	PA14_RS02255;PA14_05540	false	false	50	50	0.783814	0.230393	0.411328	1.42516	-0.637531	-0.385811	5.32216	3.897	-0.637531	-0.385811	0.2355	0.2184	1	0	1	1	1	1	1	1	1	1	1	1	1	1	1	1	1	1	1	1	1	1	1	1	1	1	1	1
198	438	hypothetical protein	-	-	Q012_RS25960;Q012_03808	false	false	2	2	0.415223	0.603228	0.725925	-0.6098	0.381718	0.139108	4.681	5.2908	0.381718	0.139108	0.3993	0.4047	0	0	0	0	0	0	0	0	0	0	0	0	0	0	0	0	0	1	0	0	0	0	0	0	0	0	0	0
199	439	cation transporter	PA14_RS12680;PA14_31010	-	PA14_RS12680;PA14_31010	false	false	11	11	0.376878	0.631601	0.732662	-0.279809	0.423799	0.135096	5.04673	5.32654	0.423799	0.135096	0.3663	0.3645	0	0	0	1	0	0	0	1	0	0	0	1	0	0	0	0	0	0	1	0	0	0	0	1	0	0	0	1
200	447	histidine kinase	-	-	PABE171_RS24730;PABE171_4750	false	false	1	1	0.526562	0.5	0.997882	-0.00647059	-0.30103	0.000920888	5.261	5.26747	-0.30103	0.000920888	0.4747	0.5185	0	0	0	0	0	0	0	0	0	0	0	0	0	0	0	0	0	0	0	0	0	0	0	0	0	0	1	0
201	448	resistance-nodulation-cell division (RND) efflux transporter	PA14_RS13045;PA14_31890	PA2527;-	PA14_RS13045;PA14_31890	false	false	52	52	1	1	1	0	0	0	5.26735	NaN	0	0	0	0	1	1	1	1	1	1	1	1	1	1	1	1	1	1	1	1	1	1	1	1	1	1	1	1	1	1	1	1
202	449	DEAD/DEAH box helicase	-	-	NR40_RS07865;-	false	false	3	3	0.970207	0.0325482	0.132567	2.13482	-1.48747	-0.877564	7.279	5.14418	-1.48747	-0.877564	0.0268	0.0765	0	0	0	0	0	0	0	0	0	0	0	0	0	0	0	0	0	0	0	0	0	0	0	0	0	0	0	0
203	452	multidrug efflux RND transporter permease subunit	PA14_RS24855;PA14_60830	PA4598;-	PA14_RS24855;PA14_60830	false	false	52	52	1	1	1	0	0	0	5.26735	NaN	0	0	0	0	1	1	1	1	1	1	1	1	1	1	1	1	1	1	1	1	1	1	1	1	1	1	1	1	1	1	1	1
204	455	hypothetical protein	-	-	PACIG1_RS30860;PACIG1_5871	false	false	1	1	0.369508	0.655343	0.715611	-0.887412	0.432376	0.145323	4.397	5.28441	0.432376	0.145323	0.3769	0.3771	0	0	0	0	0	0	0	0	0	0	0	0	0	0	0	0	0	0	0	0	1	0	0	0	0	0	0	0
205	456	serine/threonine protein kinase	PA14_RS00375;PA14_00875	PA0074;-	PA14_RS00375;PA14_00875	false	false	43	43	0.528924	0.480708	0.927774	-0.0802016	-0.318119	0.032558	5.25347	5.33367	-0.318119	0.032558	0.4722	0.4579	1	1	0	1	1	0	1	1	1	1	1	1	1	1	1	1	1	1	1	0	0	1	1	1	1	1	0	0
206	458	glycosyl transferase family 51	PA14_RS22020;PA14_54080	PA0788;-	PA14_RS22020;PA14_54080	false	false	52	52	1	1	1	0	0	0	5.26735	NaN	0	0	0	0	1	1	1	1	1	1	1	1	1	1	1	1	1	1	1	1	1	1	1	1	1	1	1	1	1	1	1	1
207	464	multidrug efflux RND transporter permease subunit	-	-	NQ81_RS26720;-	false	false	1	1	0.320458	0.703	0.566684	-1.39416	0.494228	0.246659	3.9	5.29416	0.494228	0.246659	0.3477	0.3494	0	0	0	0	0	0	0	0	0	0	0	0	0	0	0	0	0	0	1	0	0	0	0	0	0	0	0	0
208	465	acriflavin resistance protein	-	-	Q009_RS13360;Q009_01099	false	false	4	4	0.181403	0.827511	0.335259	-1.20477	0.741357	0.474619	4.15525	5.36002	0.741357	0.474619	0.1809	0.1742	0	0	0	0	0	0	0	0	0	0	0	0	1	0	0	0	0	1	0	0	0	1	0	0	0	1	0	0
209	468	type I restriction protein of type I restriction-modification system	-	-	NR77_RS25520;-	false	false	1	1	0.72564	0.297	0.726497	0.852039	-0.527244	-0.138766	6.103	5.25096	-0.527244	-0.138766	0.3225	0.3241	0	0	0	0	0	0	0	0	0	0	0	0	0	0	0	0	0	0	0	0	0	0	0	0	0	0	0	0
210	472	multidrug transporter	PA14_RS18920;PA14_46590	-	PA14_RS18920;PA14_46590	false	false	11	11	0.108908	0.895218	0.217375	-1.00331	0.96294	0.66279	4.47627	5.47959	0.96294	0.66279	0.1077	0.1066	1	0	0	1	0	0	0	0	0	0	0	1	1	0	0	0	0	1	0	1	0	0	0	1	0	0	0	1
211	473	resistance-nodulation-cell division (RND) efflux transporter	PA14_RS13050;PA14_31900	PA2526;-	PA14_RS13050;PA14_31900	false	false	52	52	1	1	1	0	0	0	5.26735	NaN	0	0	0	0	1	1	1	1	1	1	1	1	1	1	1	1	1	1	1	1	1	1	1	1	1	1	1	1	1	1	1	1
212	474	resistance-nodulation-cell division (RND) efflux transporter	PA14_RS18625;PA14_45890	PA1436;-	PA14_RS18625;PA14_45890	false	false	51	51	0.897242	0.115194	0.278294	2.62686	-0.93857	-0.555496	5.31786	2.691	-0.93857	-0.555496	0.131	0.1435	1	1	1	1	1	1	1	0	1	1	1	1	1	1	1	1	1	1	1	1	1	1	1	1	1	1	1	1
213	475	hypothetical protein	PA14_RS01395;PA14_03380	-	PA14_RS01395;PA14_03380	false	false	7	7	0.740035	0.268735	0.502519	0.656121	-0.570676	-0.298848	5.83514	5.17902	-0.570676	-0.298848	0.2709	0.2549	0	0	0	1	0	0	0	0	0	0	0	1	0	0	0	0	0	0	0	0	0	0	0	0	0	0	0	0
214	480	type III restriction enzyme	-	-	P998_RS33865;P998_05553	false	false	1	1	0.679542	0.344657	0.80835	0.59102	-0.462613	-0.0924004	5.847	5.25598	-0.462613	-0.0924004	0.3711	0.3733	0	0	0	0	0	0	0	0	0	0	0	0	0	0	0	0	0	0	0	0	0	0	0	0	0	0	0	0
215	482	DEAD/DEAH box helicase	-	-	P998_RS24195;P998_03587	false	false	4	4	0.321467	0.690738	0.540373	-0.767646	0.492864	0.267306	4.55875	5.3264	0.492864	0.267306	0.3157	0.2838	0	0	0	0	0	0	0	0	0	0	0	0	1	0	0	0	0	0	0	1	0	0	0	0	0	1	0	0
216	486	acriflavine resistance protein B	PA14_RS03860;PA14_09520	PA4207;-	PA14_RS03860;PA14_09520	false	false	51	51	0.0548941	0.952121	0.041044	-4.87643	1.26047	1.38675	5.17357	10.05	1.26047	1.38675	0.0208	0.0245	1	1	1	1	1	1	1	1	1	1	1	1	1	1	1	1	1	1	1	1	1	1	1	1	1	1	1	1
217	487	error-prone DNA polymerase	PA14_RS22675;PA14_55610	PA0669;-	PA14_RS22675;PA14_55610	false	false	52	52	1	1	1	0	0	0	5.26735	NaN	0	0	0	0	1	1	1	1	1	1	1	1	1	1	1	1	1	1	1	1	1	1	1	1	1	1	1	1	1	1	1	1
218	490	cytochrome-c peroxidase	-	-	NR77_RS09840;-	false	false	1	1	0.72564	0.297	0.726497	0.852039	-0.527244	-0.138766	6.103	5.25096	-0.527244	-0.138766	0.3225	0.3241	0	0	0	0	0	0	0	0	0	0	0	0	0	0	0	0	0	0	0	0	0	0	0	0	0	0	0	0
219	492	Resistance-Nodulation-Cell Division (RND) efflux transporter	PA14_RS06745;PA14_16820	PA3676;-	PA14_RS06745;PA14_16820	false	false	104	52	1	1	1	0	0	0	5.26735	NaN	0	0	0	0	2	2	2	2	2	2	2	2	2	2	2	2	2	2	2	2	2	2	2	2	2	2	2	2	2	2	2	2
220	495	tape measure domain-containing protein	-	-	NT80_RS01605;-	false	false	1	1	0.919131	0.091328	0.136629	3.58765	-1.0394	-0.864456	8.786	5.19835	-1.0394	-0.864456	0.0987	0.1028	0	0	0	0	0	0	0	0	0	0	0	0	0	0	0	0	0	0	0	0	0	0	0	0	0	0	0	0
221	497	ABC transporter	-	-	L683_RS56045;L683_19130	false	false	1	1	0.0626977	0.945106	0.203929	-3.07141	1.20275	0.690521	2.255	5.32641	1.20275	0.690521	0.0322	0.0355	0	0	1	0	0	0	0	0	0	0	0	0	0	0	0	0	0	0	0	0	0	0	0	0	0	0	0	0
222	499	formate dehydrogenase-N subunit alpha	PA14_RS26015;-	PA4812;-	PA14_RS26015;-	false	false	103	52	1	1	1	0	0	0	5.26735	NaN	0	0	0	0	2	2	2	2	2	2	2	2	2	2	2	2	2	2	2	2	2	2	2	2	2	2	2	2	2	2	2	2
223	501	MexW/MexI family multidrug efflux RND transporter permease subunit	PA14_RS23185;PA14_56890	PA4375;-	PA14_RS23185;PA14_56890	false	false	52	52	1	1	1	0	0	0	5.26735	NaN	0	0	0	0	1	1	1	1	1	1	1	1	1	1	1	1	1	1	1	1	1	1	1	1	1	1	1	1	1	1	1	1
224	502	hypothetical protein	-	-	PACIG1_RS09405;PACIG1_1803	false	false	6	6	0.701903	0.308101	0.692306	0.41429	-0.511307	-0.159702	5.63383	5.21954	-0.511307	-0.159702	0.3009	0.3361	0	0	0	0	0	0	0	0	0	0	0	0	1	0	0	0	0	0	0	0	1	0	0	0	0	1	0	0
225	503	ACR family transporter	-	-	NR77_RS30960;-	false	false	1	1	0.72564	0.297	0.726497	0.852039	-0.527244	-0.138766	6.103	5.25096	-0.527244	-0.138766	0.3225	0.3241	0	0	0	0	0	0	0	0	0	0	0	0	0	0	0	0	0	0	0	0	0	0	0	0	0	0	0	0
226	505	type III restriction enzyme, res subunit	-	-	-	false	false	3	3	0.970207	0.0325482	0.132567	2.13482	-1.48747	-0.877564	7.279	5.14418	-1.48747	-0.877564	0.0268	0.0765	0	0	0	0	0	0	0	0	0	0	0	0	0	0	0	0	0	0	0	0	0	0	0	0	0	0	0	0
227	506	type IV secretion protein Rhs	PA14_RS01305;PA14_03220	PA0262;-	PA14_RS01305;PA14_03220	false	false	68	47	0.167961	0.839717	0.33517	-1.08918	0.774792	0.474735	5.16262	6.2518	0.774792	0.474735	0.1657	0.1699	1	1	1	2	1	2	0	1	2	2	2	1	1	1	1	1	1	2	1	2	1	2	1	1	1	1	1	1
228	507	ABC transporter permease	-	-	NT80_RS24420;-	false	false	1	1	0.919131	0.091328	0.136629	3.58765	-1.0394	-0.864456	8.786	5.19835	-1.0394	-0.864456	0.0987	0.1028	0	0	0	0	0	0	0	0	0	0	0	0	0	0	0	0	0	0	0	0	0	0	0	0	0	0	0	0
229	511	hypothetical protein	-	-	Q000_RS19830;Q000_02669	false	false	2	2	0.603228	0.415223	0.744503	0.56696	-0.381718	-0.128134	5.8125	5.24554	-0.381718	-0.128134	0.3994	0.3705	0	0	0	0	0	0	0	0	0	0	1	0	0	0	0	0	0	0	0	0	0	0	0	0	0	0	0	0
230	512	adhesin	PA14_RS04480;PA14_11100	PA4082;-	PA14_RS04480;PA14_11100	false	false	51	51	0.85681	0.158784	0.307161	2.47596	-0.799192	-0.512634	5.31496	2.839	-0.799192	-0.512634	0.1896	0.2044	1	1	1	1	1	1	1	1	1	1	0	1	1	1	1	1	1	1	1	1	1	1	1	1	1	1	1	1
231	513	type III restriction endonuclease subunit R	-	-	NR39_RS08975;-	false	false	2	2	0.754893	0.260311	0.720628	0.62208	-0.584507	-0.142289	5.8655	5.24342	-0.584507	-0.142289	0.2526	0.3475	0	0	0	0	0	0	0	0	0	0	0	0	0	0	0	0	0	0	0	0	0	0	0	0	0	1	0	0
232	516	resistance-nodulation-cell division (RND) efflux transporter	PA14_RS00805;PA14_01970	PA0158;-	PA14_RS00805;PA14_01970	false	false	51	51	0.679542	0.344657	0.628769	1.17698	-0.462613	-0.201509	5.28998	4.113	-0.462613	-0.201509	0.3642	0.3804	1	1	1	1	1	1	1	1	1	1	1	1	1	1	1	1	1	1	1	0	1	1	1	1	1	1	1	1
233	517	reverse transcriptase	-	-	Y880_RS01570;-	false	false	3	3	0.562372	0.453137	0.770588	0.418463	-0.343771	-0.113178	5.66167	5.2432	-0.343771	-0.113178	0.4453	0.3802	0	0	0	0	0	0	0	0	0	0	0	0	1	0	0	0	0	0	0	0	1	0	0	0	0	0	0	0
234	523	DEAD/DEAH box helicase	-	-	NS72_RS14880;-	false	false	1	1	0.897242	0.115194	0.170482	3.30929	-0.93857	-0.768321	8.513	5.20371	-0.93857	-0.768321	0.1357	0.137	0	0	0	0	0	0	0	0	0	0	0	0	0	0	0	0	0	0	0	0	0	0	0	0	0	0	0	0
235	530	hypothetical protein	-	-	NS42_RS26030;-	false	false	2	2	0.912474	0.0953412	0.2283	2.08172	-1.02072	-0.641494	7.269	5.18728	-1.02072	-0.641494	0.1023	0.1332	0	0	0	0	0	0	0	0	0	0	0	0	0	0	0	0	0	0	0	0	0	0	0	0	0	0	0	0
236	532	membrane biogenesis protein	-	-	NQ73_RS24845;-	false	false	1	1	0.5	0.526562	0.937531	-0.19102	0.30103	0.0280144	5.08	5.27102	0.30103	0.0280144	0.4854	0.4917	0	0	0	0	0	0	0	0	0	0	0	0	0	0	0	0	0	0	0	0	0	0	0	0	0	1	0	0
237	534	lambda family phage tail tape measure protein	-	-	Q000_RS14470;Q000_01568	false	false	2	2	0.621452	0.396772	0.672371	0.73544	-0.40146	-0.172391	5.9745	5.23906	-0.40146	-0.172391	0.3815	0.3238	0	0	0	0	0	0	0	0	0	0	1	0	0	0	0	0	0	0	0	0	0	0	0	0	0	0	0	0
238	537	transposase	PA14_RS14530;PA14_35740	-	PA14_RS14530;PA14_35740	false	false	18	14	0.528781	0.479433	0.898182	-0.0965564	-0.319272	0.0466354	5.19679	5.29334	-0.319272	0.0466354	0.4866	0.4414	0	0	0	1	0	0	0	0	0	0	0	2	1	0	0	0	0	0	1	3	1	0	0	0	0	1	0	0
239	539	type IV secretion protein IcmB	-	-	NQ81_RS02000;-	false	false	1	1	0.320458	0.703	0.566684	-1.39416	0.494228	0.246659	3.9	5.29416	0.494228	0.246659	0.3477	0.3494	0	0	0	0	0	0	0	0	0	0	0	0	0	0	0	0	0	0	1	0	0	0	0	0	0	0	0	0
240	541	restriction endonuclease subunit R	-	-	PABE171_RS05240;PABE171_1014	false	false	1	1	0.526562	0.5	0.997882	-0.00647059	-0.30103	0.000920888	5.261	5.26747	-0.30103	0.000920888	0.4747	0.5185	0	0	0	0	0	0	0	0	0	0	0	0	0	0	0	0	0	0	0	0	0	0	0	0	0	0	1	0
241	543	glycoprotein	-	-	ACP77_RS11395;-	false	true	5	5	0.847161	0.160283	0.214939	1.3972	-0.795112	-0.667684	6.5302	5.133	-0.795112	-0.667684	0.1581	0.1124	0	0	0	0	0	0	0	0	0	0	0	1	0	0	0	0	0	0	0	0	0	0	0	1	0	0	0	0
242	545	outer membrane autotransporter barrel domain-containing protein	PA14_RS07460;PA14_18630	PA3535;-	PA14_RS07460;PA14_18630	false	false	52	52	1	1	1	0	0	0	5.26735	NaN	0	0	0	0	1	1	1	1	1	1	1	1	1	1	1	1	1	1	1	1	1	1	1	1	1	1	1	1	1	1	1	1
243	550	transketolase	PA14_RS02860;PA14_07130	PA0548;-	PA14_RS02860;PA14_07130	false	false	104	52	1	1	1	0	0	0	5.26735	NaN	0	0	0	0	2	2	2	2	2	2	2	2	2	2	2	2	2	2	2	2	2	2	2	2	2	2	2	2	2	2	2	2
244	553	DEAD/DEAH box helicase	-	-	Q009_RS18450;Q009_02159	false	false	3	3	0.153766	0.855351	0.291041	-1.50731	0.81314	0.536046	3.847	5.35431	0.81314	0.536046	0.1551	0.1521	0	0	0	0	0	0	0	0	0	0	0	0	1	0	0	0	0	1	0	0	0	1	0	0	0	0	0	0
245	554	transposase	-	-	Q009_RS32065;Q009_04986	false	false	3	3	0.816651	0.193951	0.409199	1.18078	-0.712308	-0.388066	6.38	5.19922	-0.712308	-0.388066	0.1961	0.2059	0	0	0	0	0	0	0	0	0	0	0	0	0	0	0	0	0	0	0	0	0	1	0	0	0	0	0	0
246	556	membrane protein	PA14_RS13525;PA14_33190	PA2068;-	PA14_RS13525;PA14_33190	false	false	104	52	1	1	1	0	0	0	5.26735	NaN	0	0	0	0	2	2	2	2	2	2	2	2	2	2	2	2	2	2	2	2	2	2	2	2	2	2	2	2	2	2	2	2
247	559	two-component system sensor histidine kinase/response regulator	PA14_RS12520;PA14_30700	PA2583;-	PA14_RS12520;PA14_30700	false	false	52	51	0.553007	0.473438	0.922567	0.236902	-0.324737	-0.035002	5.2719	5.035	-0.324737	-0.035002	0.463	0.4761	1	1	1	1	1	1	1	1	1	1	1	1	2	1	1	1	1	1	1	1	1	1	1	1	0	1	1	1
248	560	putative siderophore biosynthesis enzyme	PA14_RS22380;PA14_54940	-	PA14_RS22380;PA14_54940	false	false	4	4	0.219859	0.79017	0.393601	-1.06773	0.657856	0.404943	4.28175	5.34948	0.657856	0.404943	0.2158	0.2015	0	0	0	1	0	0	0	0	0	0	0	1	0	0	0	0	0	0	0	0	0	0	0	0	0	0	0	0
249	561	hypothetical protein	-	-	NQ81_RS00025;-	false	false	2	2	0.073346	0.93305	0.186852	-2.27744	1.13462	0.728502	3.0775	5.35494	1.13462	0.728502	0.0784	0.0946	0	0	1	0	0	0	0	0	0	0	0	0	0	0	0	0	0	0	1	0	0	0	0	0	0	0	0	0
250	562	peptide synthetase	PA14_RS04500;PA14_11140	PA4078;-	PA14_RS04500;PA14_11140	false	false	46	46	0.0284088	0.973404	0.101299	-1.69375	1.54655	0.994396	5.07191	6.76567	1.54655	0.994396	0.0262	0.0568	1	1	1	1	1	1	1	1	1	1	1	1	1	1	1	1	1	1	1	1	0	1	1	1	1	1	1	1
251	564	TonB-dependent receptor	PA14_RS26455;PA14_64710	PA4897;-	PA14_RS26455;PA14_64710	false	false	52	52	1	1	1	0	0	0	5.26735	NaN	0	0	0	0	1	1	1	1	1	1	1	1	1	1	1	1	1	1	1	1	1	1	1	1	1	1	1	1	1	1	1	1
252	565	TonB-dependent receptor	PA14_RS15410;PA14_37900	PA2057;-	PA14_RS15410;PA14_37900	false	false	52	52	1	1	1	0	0	0	5.26735	NaN	0	0	0	0	1	1	1	1	1	1	1	1	1	1	1	1	1	1	1	1	1	1	1	1	1	1	1	1	1	1	1	1
253	572	transposase	PA14_RS06140;PA14_15410	-	PA14_RS06140;PA14_15410	false	false	28	17	0.687115	0.319827	0.593832	0.380003	-0.495085	-0.226336	5.52312	5.14311	-0.495085	-0.226336	0.3219	0.3001	0	0	0	2	0	0	0	1	0	0	0	2	0	0	0	0	0	3	2	2	1	2	0	0	0	1	0	0
254	574	bifunctional glutamine synthetase adenylyltransferase/deadenyltransferase	PA14_RS27055;PA14_66270	PA5014;-	PA14_RS27055;PA14_66270	false	false	52	52	1	1	1	0	0	0	5.26735	NaN	0	0	0	0	1	1	1	1	1	1	1	1	1	1	1	1	1	1	1	1	1	1	1	1	1	1	1	1	1	1	1	1
255	578	hypothetical protein	-	-	Q011_RS27335;Q011_04070	false	false	1	1	0.297	0.72564	0.544685	-1.47369	0.527244	0.263855	3.822	5.29569	0.527244	0.263855	0.3254	0.3299	0	0	0	0	0	0	0	0	0	0	0	0	0	0	0	0	0	1	0	0	0	0	0	0	0	0	0	0
256	580	hypothetical protein	-	-	NT11_RS25010;-	false	false	2	2	0.0994362	0.908628	0.191711	-2.253	1.00246	0.717354	3.101	5.354	1.00246	0.717354	0.1003	0.0904	0	0	0	0	0	0	0	0	1	0	0	0	0	0	0	1	0	0	0	0	0	0	0	0	0	0	0	0
257	582	conjugative transfer ATPase, PFL_4706 family	PA14_RS24460;PA14_59940	-	-	false	true	37	35	0.279197	0.727322	0.366175	-0.642188	0.554089	0.436312	5.0574	5.69959	0.554089	0.436312	0.2687	0.1794	1	1	1	1	0	0	0	0	1	1	1	1	1	0	0	1	0	1	1	1	1	1	0	1	1	0	1	1
258	583	ATPase P	-	-	ACP77_RS12175;-	false	false	8	8	0.347116	0.662202	0.801945	-0.232636	0.459525	0.0958554	5.0705	5.30314	0.459525	0.0958554	0.3426	0.4104	0	0	1	0	0	0	0	1	0	0	0	0	0	0	0	0	0	1	0	0	0	0	0	1	0	0	0	1
259	585	two-component sensor CbrA	PA14_RS25555;PA14_62530	PA4725;-	PA14_RS25555;PA14_62530	false	false	51	51	0.128664	0.884806	0.205412	-3.06153	0.890542	0.687374	5.20847	8.27	0.890542	0.687374	0.1536	0.1582	1	1	1	1	1	1	1	1	1	1	1	1	1	1	1	1	1	1	1	1	1	1	1	1	1	1	1	1
260	587	hypothetical protein	-	-	NS72_RS02495;-	false	false	1	1	0.897242	0.115194	0.170482	3.30929	-0.93857	-0.768321	8.513	5.20371	-0.93857	-0.768321	0.1357	0.137	0	0	0	0	0	0	0	0	0	0	0	0	0	0	0	0	0	0	0	0	0	0	0	0	0	0	0	0
261	590	hypothetical protein	-	-	NS72_RS02750;-	false	false	1	1	0.897242	0.115194	0.170482	3.30929	-0.93857	-0.768321	8.513	5.20371	-0.93857	-0.768321	0.1357	0.137	0	0	0	0	0	0	0	0	0	0	0	0	0	0	0	0	0	0	0	0	0	0	0	0	0	0	0	0
262	593	autotransporter	PA14_RS09865;PA14_24360	-	PA14_RS09865;PA14_24360	false	false	12	12	0.213963	0.792311	0.388825	-0.682083	0.669662	0.410245	4.74267	5.42475	0.669662	0.410245	0.2084	0.191	1	0	0	1	0	0	1	0	0	0	0	0	0	0	0	0	1	1	0	1	0	1	0	0	0	0	0	0
263	598	transposase	-	-	NQ73_RS31700;-	false	false	1	1	0.5	0.526562	0.937531	-0.19102	0.30103	0.0280144	5.08	5.27102	0.30103	0.0280144	0.4854	0.4917	0	0	0	0	0	0	0	0	0	0	0	0	0	0	0	0	0	0	0	0	0	0	0	0	0	1	0	0
264	599	DEAD/DEAH box helicase	-	-	ACP77_RS15125;-	false	false	3	3	0.593082	0.422214	0.605403	0.740721	-0.374468	-0.217955	5.96533	5.22461	-0.374468	-0.217955	0.4131	0.2974	0	0	1	0	0	0	0	0	0	0	0	0	0	0	0	0	0	0	0	0	0	0	0	0	0	0	0	0
265	600	hypothetical protein	-	-	NT47_RS12870;-	false	false	1	1	0.703	0.320458	0.734059	0.827569	-0.494228	-0.134269	6.079	5.25143	-0.494228	-0.134269	0.34	0.349	0	0	0	0	0	0	0	0	0	0	0	0	0	0	0	0	0	0	0	0	0	0	0	0	0	0	0	0
266	601	conjugative transfer ATPase, PFL_4706 family	-	-	-	false	true	33	24	0.955239	0.0465204	0.121124	1.02829	-1.33236	-0.916769	5.82104	4.79275	-1.33236	-0.916769	0.044	0.0612	0	1	3	0	0	0	0	1	0	0	0	0	1	0	0	0	0	2	1	0	1	0	0	1	0	2	0	1
267	608	hypothetical protein	-	-	Q006_RS16915;Q006_02160	false	false	1	1	0.85681	0.158784	0.407391	2.01235	-0.799192	-0.389988	7.241	5.22865	-0.799192	-0.389988	0.1913	0.1918	0	0	0	0	0	0	0	0	0	0	0	0	0	0	0	0	0	0	0	0	0	0	0	0	0	0	0	0
268	611	ribonucleotide-diphosphate reductase subunit alpha	PA14_RS20090;PA14_49460	PA1156;-	PA14_RS20090;PA14_49460	false	false	52	52	1	1	1	0	0	0	5.26735	NaN	0	0	0	0	1	1	1	1	1	1	1	1	1	1	1	1	1	1	1	1	1	1	1	1	1	1	1	1	1	1	1	1
269	614	valine--tRNA ligase	PA14_RS05770;PA14_14440	PA3834;-	PA14_RS05770;PA14_14440	false	false	51	51	0.553007	0.473438	0.922567	0.236902	-0.324737	-0.035002	5.2719	5.035	-0.324737	-0.035002	0.463	0.4761	1	1	1	1	1	1	1	1	1	1	1	1	1	1	1	1	1	1	1	1	1	1	1	1	0	1	1	1
270	617	hypothetical protein	-	-	NT05_RS05375;-	false	false	2	2	0.325617	0.691333	0.586555	-0.9452	0.487293	0.231691	4.3585	5.3037	0.487293	0.231691	0.3183	0.3241	0	0	0	0	0	0	0	0	0	0	0	0	0	0	0	0	0	0	1	0	0	0	0	1	0	0	0	0
271	619	hypothetical protein	-	-	Q012_RS26000;Q012_03818	false	false	1	1	0.605082	0.420782	0.909186	0.278	-0.375943	-0.0413471	5.54	5.262	-0.375943	-0.0413471	0.4281	0.438	0	0	0	0	0	0	0	0	0	0	0	0	0	0	0	0	0	0	0	0	0	0	0	0	0	0	0	0
272	620	transposase	-	-	NS72_RS22660;-	false	false	3	3	0.967452	0.0355101	0.0693684	2.56426	-1.44965	-1.15884	7.68367	5.11941	-1.44965	-1.15884	0.0329	0.0453	0	0	0	0	0	0	0	0	0	0	0	0	0	0	0	0	0	0	0	0	0	0	0	0	0	0	0	0
273	622	glycine dehydrogenase (aminomethyl-transferring)	PA14_RS28070;PA14_68850	PA5213;-	PA14_RS28070;PA14_68850	false	false	52	52	1	1	1	0	0	0	5.26735	NaN	0	0	0	0	1	1	1	1	1	1	1	1	1	1	1	1	1	1	1	1	1	1	1	1	1	1	1	1	1	1	1	1
274	625	4Fe-4S ferredoxin	PA14_RS25800;PA14_63100	PA4772;-	PA14_RS25800;PA14_63100	false	false	51	51	0.128664	0.884806	0.205412	-3.06153	0.890542	0.687374	5.20847	8.27	0.890542	0.687374	0.1536	0.1582	1	1	1	1	1	1	1	1	1	1	1	1	1	1	1	1	1	1	1	1	1	1	1	1	1	1	1	1
275	626	PTS fructose transporter subunit IIA	PA14_RS07325;PA14_18250	PA3562;-	PA14_RS07325;PA14_18250	false	false	50	50	0.121845	0.887511	0.201955	-2.20288	0.914191	0.694746	5.18262	7.3855	0.914191	0.694746	0.1369	0.1211	1	1	1	1	1	1	1	1	1	1	1	1	1	1	1	1	1	1	1	1	1	1	1	1	1	1	1	1
276	631	hypothetical protein	-	-	NT47_RS12885;-	false	false	1	1	0.703	0.320458	0.734059	0.827569	-0.494228	-0.134269	6.079	5.25143	-0.494228	-0.134269	0.34	0.349	0	0	0	0	0	0	0	0	0	0	0	0	0	0	0	0	0	0	0	0	0	0	0	0	0	0	0	0
277	632	ATP-dependent Clp protease ClpC	-	-	ACP77_RS15330;-	false	false	5	5	0.861352	0.145627	0.297176	1.17725	-0.836759	-0.526987	6.3314	5.15415	-0.836759	-0.526987	0.1436	0.1512	0	0	0	0	0	0	0	0	0	0	0	0	0	0	0	0	0	0	0	0	1	0	0	0	0	0	0	0
278	636	GGDEF domain-containing protein	PA14_RS29255;PA14_71850	PA5442;-	PA14_RS29255;PA14_71850	false	false	51	51	0.655343	0.369508	0.715611	0.887412	-0.432376	-0.145323	5.28441	4.397	-0.432376	-0.145323	0.3769	0.3919	1	1	1	1	1	1	1	1	1	1	1	1	1	1	1	1	1	1	1	1	0	1	1	1	1	1	1	1
279	637	adenylate cyclase	PA14_RS28375;PA14_69610	PA5272;-	PA14_RS28375;PA14_69610	false	false	50	50	0.603228	0.415223	0.794477	0.45328	-0.381718	-0.0999184	5.28478	4.8315	-0.381718	-0.0999184	0.3928	0.4303	1	1	1	1	1	1	1	1	1	1	1	1	1	1	1	1	1	1	1	1	1	1	0	1	0	1	1	1
280	638	RNA polymerase-associated protein RapA	PA14_RS08545;PA14_21230	PA3308;-	PA14_RS08545;PA14_21230	false	false	52	52	1	1	1	0	0	0	5.26735	NaN	0	0	0	0	1	1	1	1	1	1	1	1	1	1	1	1	1	1	1	1	1	1	1	1	1	1	1	1	1	1	1	1
281	639	hypothetical protein	-	-	NR50_RS27210;-	false	false	1	1	0.655343	0.369508	0.829501	0.524745	-0.432376	-0.0811833	5.782	5.25725	-0.432376	-0.0811833	0.3748	0.3808	0	0	0	0	0	0	0	0	0	0	0	0	0	0	0	0	0	0	0	0	0	0	0	0	0	0	0	0
282	640	PbsX family transcriptional regulator	PA14_RS09915;PA14_24480	PA3064;-	PA14_RS09915;PA14_24480	false	false	52	52	1	1	1	0	0	0	5.26735	NaN	0	0	0	0	1	1	1	1	1	1	1	1	1	1	1	1	1	1	1	1	1	1	1	1	1	1	1	1	1	1	1	1
283	642	chromosome segregation ATPase	PA14_RS25325;PA14_61990	PA4686;-	PA14_RS25325;PA14_61990	false	false	52	52	1	1	1	0	0	0	5.26735	NaN	0	0	0	0	1	1	1	1	1	1	1	1	1	1	1	1	1	1	1	1	1	1	1	1	1	1	1	1	1	1	1	1
284	644	hypothetical protein	-	-	P997_RS31375;P997_05000	false	false	1	1	0.135794	0.878202	0.285721	-2.5871	0.867119	0.544058	2.73	5.3171	0.867119	0.544058	0.1637	0.1691	0	0	0	0	0	0	0	0	0	1	0	0	0	0	0	0	0	0	0	0	0	0	0	0	0	0	0	0
285	646	excinuclease ABC subunit A	PA14_RS03725;PA14_09180	PA4234;-	PA14_RS03725;PA14_09180	false	false	50	50	0.360591	0.657065	0.551003	-1.036	0.442986	0.258846	5.2275	6.2635	0.442986	0.258846	0.3485	0.2718	1	1	1	1	1	1	1	1	1	1	1	0	1	1	1	1	1	1	1	1	1	1	1	1	1	1	1	1
286	651	2-oxoglutarate dehydrogenase subunit E1	PA14_RS17870;PA14_44010	PA1585;-	PA14_RS17870;PA14_44010	false	false	52	52	1	1	1	0	0	0	5.26735	NaN	0	0	0	0	1	1	1	1	1	1	1	1	1	1	1	1	1	1	1	1	1	1	1	1	1	1	1	1	1	1	1	1
287	652	isoleucine--tRNA ligase	PA14_RS24655;PA14_60370	PA4560;-	PA14_RS24655;PA14_60370	false	false	51	51	0.908672	0.102758	0.274161	2.64929	-0.988183	-0.561994	5.31829	2.669	-0.988183	-0.561994	0.1126	0.1274	1	1	1	1	1	1	0	1	1	1	1	1	1	1	1	1	1	1	1	1	1	1	1	1	1	1	1	1
288	653	aldehyde oxidase	PA14_RS24980;PA14_61150	PA4621;-	PA14_RS24980;PA14_61150	false	false	51	51	0.908672	0.102758	0.274161	2.64929	-0.988183	-0.561994	5.31829	2.669	-0.988183	-0.561994	0.1126	0.1274	1	1	1	1	1	1	0	1	1	1	1	1	1	1	1	1	1	1	1	1	1	1	1	1	1	1	1	1
289	654	hybrid sensor histidine kinase/response regulator	PA14_RS26245;PA14_64230	PA4856;-	PA14_RS26245;PA14_64230	false	false	51	51	0.369508	0.655343	0.829501	-0.524745	0.432376	0.0811833	5.25725	5.782	0.432376	0.0811833	0.3748	0.3796	1	1	1	1	1	1	1	1	1	1	1	1	1	1	1	1	1	1	1	1	1	1	1	1	1	1	1	1
290	657	hybrid sensor histidine kinase/response regulator	-	-	NR92_RS13340;-	false	false	1	1	0.579218	0.446993	0.963079	0.112824	-0.349699	-0.0163379	5.378	5.26518	-0.349699	-0.0163379	0.4479	0.4509	0	0	0	0	0	0	0	0	0	0	0	0	0	0	0	0	0	0	0	0	0	0	0	0	0	0	0	0
291	659	ATPase P	-	-	NS42_RS07940;-	false	false	2	2	0.912474	0.0953412	0.2283	2.08172	-1.02072	-0.641494	7.269	5.18728	-1.02072	-0.641494	0.1023	0.1332	0	0	0	0	0	0	0	0	0	0	0	0	0	0	0	0	0	0	0	0	0	0	0	0	0	0	0	0
292	662	hypothetical protein	-	-	P997_RS09845;P997_00598	false	false	1	1	0.135794	0.878202	0.285721	-2.5871	0.867119	0.544058	2.73	5.3171	0.867119	0.544058	0.1637	0.1691	0	0	0	0	0	0	0	0	0	1	0	0	0	0	0	0	0	0	0	0	0	0	0	0	0	0	0	0
293	664	hypothetical protein	-	-	Q009_RS33535;Q009_05291	false	false	2	2	0.275988	0.739689	0.51229	-1.13812	0.55911	0.290484	4.173	5.31112	0.55911	0.290484	0.2729	0.2782	0	0	0	0	0	0	0	0	0	0	0	0	0	0	0	0	0	1	0	0	0	1	0	0	0	0	0	0
294	665	hybrid sensor histidine kinase/response regulator	PA14_RS24395;PA14_59800	-	PA14_RS24395;PA14_59800	false	false	4	4	0.219859	0.79017	0.393601	-1.06773	0.657856	0.404943	4.28175	5.34948	0.657856	0.404943	0.2158	0.2015	0	0	0	1	0	0	0	0	0	0	0	1	0	0	0	0	0	0	0	0	0	0	0	0	0	0	0	0
295	666	LPS-assembly protein LptD	PA14_RS03105;PA14_07770	PA0595;-	PA14_RS03105;PA14_07770	false	false	51	51	0.824547	0.193189	0.384173	2.11298	-0.714017	-0.415473	5.30798	3.195	-0.714017	-0.415473	0.2293	0.2438	1	1	1	1	1	1	1	1	1	1	1	1	0	1	1	1	1	1	1	1	1	1	1	1	1	1	1	1
296	669	helicase IV	-	-	Q002_RS14235;Q002_01534	false	false	2	2	0.112489	0.896342	0.252053	-1.98052	0.948888	0.598508	3.363	5.34352	0.948888	0.598508	0.119	0.1304	0	1	0	0	0	0	0	0	0	0	0	0	0	0	0	0	0	0	0	0	0	0	0	0	1	0	0	0
297	671	monovalent cation/H+ antiporter subunit A	PA14_RS20600;PA14_50730	PA1054;-	PA14_RS20600;PA14_50730	false	false	53	52	1	1	1	0	0	0	5.26735	NaN	0	0	0	0	1	1	1	1	1	1	1	1	1	1	1	1	1	1	1	1	2	1	1	1	1	1	1	1	1	1	1	1
298	673	ClpA/B protease ATP-binding subunit	PA14_RS02415;PA14_06000	PA0459;-	PA14_RS02415;PA14_06000	false	false	51	51	0.0808686	0.92866	0.103292	-3.918	1.09222	0.985933	5.192	9.11	1.09222	0.985933	0.0776	0.0809	1	1	1	1	1	1	1	1	1	1	1	1	1	1	1	1	1	1	1	1	1	1	1	1	1	1	1	1
299	676	zinc chelation protein SecC	-	-	NT41_RS09990;-	false	false	1	1	0.747394	0.27436	0.722097	0.866314	-0.561679	-0.141404	6.117	5.25069	-0.561679	-0.141404	0.3166	0.3183	0	0	0	0	0	0	0	0	0	0	0	0	0	0	0	0	0	0	0	0	0	0	0	0	0	0	0	0
300	677	Wall-associated protein	PA14_RS08240;PA14_20520	PA2458;-	PA14_RS08240;PA14_20520	false	false	48	40	0.683611	0.324159	0.627916	0.3846	-0.489242	-0.202099	5.3561	4.9715	-0.489242	-0.202099	0.3203	0.3152	1	2	1	2	1	1	0	1	0	1	1	0	0	2	1	1	0	3	1	1	0	2	1	2	1	0	1	1
301	683	alkanesulfonate monooxygenase	PA14_RS07825;PA14_19560	PA3420;-	PA14_RS07825;PA14_19560	false	false	103	52	1	1	1	0	0	0	5.26735	NaN	0	0	0	0	2	2	2	2	2	2	2	2	2	2	2	2	2	2	2	2	2	2	2	2	2	2	2	2	2	2	2	2
302	687	helicase SNF2	-	-	Q009_RS38995;Q009_06414	false	false	4	4	0.79017	0.219859	0.371937	1.11708	-0.657856	-0.42953	6.2985	5.18142	-0.657856	-0.42953	0.2206	0.1887	0	0	0	0	0	0	0	0	0	0	0	0	0	0	0	0	0	0	0	0	0	1	0	0	0	1	0	0
303	688	DNA gyrase subunit A	PA14_RS09415;PA14_23260	PA3168;-	PA14_RS09415;PA14_23260	false	false	52	52	1	1	1	0	0	0	5.26735	NaN	0	0	0	0	1	1	1	1	1	1	1	1	1	1	1	1	1	1	1	1	1	1	1	1	1	1	1	1	1	1	1	1
304	691	lactate dehydrogenase	PA14_RS06230;PA14_15580	-	PA14_RS06230;PA14_15580	false	false	7	7	0.467947	0.542702	0.815689	-0.22854	0.329803	0.0884754	5.06957	5.29811	0.329803	0.0884754	0.4604	0.4142	0	0	0	1	0	0	0	0	0	0	0	1	0	0	0	0	0	1	0	0	0	0	0	0	0	0	0	0
305	692	malto-oligosyltrehalose synthase	PA14_RS14900;PA14_36605	PA2162;-	PA14_RS14900;PA14_36605	false	false	49	49	0.453137	0.562372	0.876826	-0.22249	0.343771	0.0570866	5.25451	5.477	0.343771	0.0570866	0.4395	0.4233	1	1	1	1	1	1	1	1	1	1	1	1	1	1	1	1	0	1	1	1	0	1	1	1	1	1	1	1
306	696	type III restriction endonuclease subunit R	-	-	NT47_RS23100;-	false	false	1	1	0.703	0.320458	0.734059	0.827569	-0.494228	-0.134269	6.079	5.25143	-0.494228	-0.134269	0.34	0.349	0	0	0	0	0	0	0	0	0	0	0	0	0	0	0	0	0	0	0	0	0	0	0	0	0	0	0	0
307	697	PAS domain-containing sensor histidine kinase	PA14_RS22765;PA14_55780	PA4293;-	PA14_RS22765;PA14_55780	false	false	50	50	0.0609939	0.94454	0.123289	-2.6506	1.21471	0.909075	5.1654	7.816	1.21471	0.909075	0.0608	0.0657	1	1	1	1	1	1	1	1	1	1	1	1	1	1	1	1	1	1	1	1	1	1	1	1	1	1	1	1
308	699	peptidoglycan-binding protein LysM	PA14_RS09655;PA14_23830	PA3115;-	PA14_RS09655;PA14_23830	false	false	53	52	1	1	1	0	0	0	5.26735	NaN	0	0	0	0	1	1	1	1	1	1	1	1	1	1	1	1	1	1	1	1	1	1	1	1	1	1	1	1	1	1	1	1
309	701	hypothetical protein	PA14_RS02980;PA14_07430	PA0572;-	PA14_RS02980;PA14_07430	false	false	52	52	1	1	1	0	0	0	5.26735	NaN	0	0	0	0	1	1	1	1	1	1	1	1	1	1	1	1	1	1	1	1	1	1	1	1	1	1	1	1	1	1	1	1
310	704	type III restriction protein res subunit	-	-	ACP77_RS15150;-	false	false	3	3	0.593082	0.422214	0.605403	0.740721	-0.374468	-0.217955	5.96533	5.22461	-0.374468	-0.217955	0.4131	0.2974	0	0	1	0	0	0	0	0	0	0	0	0	0	0	0	0	0	0	0	0	0	0	0	0	0	0	0	0
311	706	hybrid sensor histidine kinase/response regulator	PA14_RS07735;PA14_19340	PA3462;-	PA14_RS07735;PA14_19340	false	false	51	51	0.841216	0.175453	0.370223	2.17518	-0.75584	-0.431536	5.30918	3.134	-0.75584	-0.431536	0.21	0.2256	1	1	1	1	1	1	1	1	1	1	1	0	1	1	1	1	1	1	1	1	1	1	1	1	1	1	1	1
312	710	mammalian cell entry protein	PA14_RS14650;PA14_36020	PA4689;-	PA14_RS14650;PA14_36020	false	false	54	38	0.0788018	0.924186	0.165041	-1.03757	1.10346	0.782408	4.988	6.02557	1.10346	0.782408	0.0779	0.0872	2	2	1	2	1	0	2	0	2	2	1	0	1	1	1	1	1	3	1	1	1	2	1	0	0	0	1	2
313	711	phage tail tape measure protein	-	-	Q009_RS28385;Q009_04216	false	true	9	9	0.830322	0.175862	0.250242	1.01056	-0.754829	-0.60164	6.103	5.09244	-0.754829	-0.60164	0.1745	0.1231	0	0	0	0	1	0	0	0	1	0	0	0	0	0	0	0	0	0	0	0	0	1	0	0	0	1	0	0
314	712	protein translocase subunit SecA	PA14_RS23330;PA14_57220	PA4403;-	PA14_RS23330;PA14_57220	false	false	52	52	1	1	1	0	0	0	5.26735	NaN	0	0	0	0	1	1	1	1	1	1	1	1	1	1	1	1	1	1	1	1	1	1	1	1	1	1	1	1	1	1	1	1
315	714	hypothetical protein	-	-	JF43_RS28475;-	false	false	1	1	0.768203	0.252606	0.684151	0.990706	-0.597556	-0.164848	6.239	5.24829	-0.597556	-0.164848	0.2907	0.2932	0	0	0	0	0	0	0	0	0	0	0	0	0	0	0	0	0	0	0	0	0	0	0	0	0	0	0	0
316	717	multidrug ABC transporter ATP-binding protein	PA14_RS28160;PA14_69070	PA5231;-	PA14_RS28160;PA14_69070	false	false	53	52	1	1	1	0	0	0	5.26735	NaN	0	0	0	0	1	1	1	1	1	1	1	1	1	1	1	1	1	1	1	1	1	1	1	2	1	1	1	1	1	1	1	1
317	720	nitrate reductase subunit alpha	PA14_RS16855;PA14_41560	PA1779;-	PA14_RS16855;PA14_41560	false	false	52	52	1	1	1	0	0	0	5.26735	NaN	0	0	0	0	1	1	1	1	1	1	1	1	1	1	1	1	1	1	1	1	1	1	1	1	1	1	1	1	1	1	1	1
318	721	hypothetical protein	-	-	NR40_RS21260;-	false	true	2	2	0.949669	0.0554604	0.14375	2.51748	-1.25602	-0.842393	7.688	5.17052	-1.25602	-0.842393	0.0526	0.079	0	0	0	0	0	0	0	0	0	0	0	0	0	0	0	0	0	0	0	0	0	0	0	0	0	0	0	0
319	723	two-component sensor histidine kinase	-	-	L683_RS42810;L683_08280	false	false	1	1	0.0626977	0.945106	0.203929	-3.07141	1.20275	0.690521	2.255	5.32641	1.20275	0.690521	0.0322	0.0355	0	0	1	0	0	0	0	0	0	0	0	0	0	0	0	0	0	0	0	0	0	0	0	0	0	0	0	0
320	724	4-deoxy-4-formamido-L-arabinose-phosphoundecaprenol deformylase ArnD	-	-	L683_RS42680;L683_08215	false	false	1	1	0.0626977	0.945106	0.203929	-3.07141	1.20275	0.690521	2.255	5.32641	1.20275	0.690521	0.0322	0.0355	0	0	1	0	0	0	0	0	0	0	0	0	0	0	0	0	0	0	0	0	0	0	0	0	0	0	0	0
321	725	DNA primase	-	-	NS86_RS20195;-	false	true	3	3	0.453137	0.562372	0.921296	0.141837	0.343771	-0.0356008	5.401	5.25916	0.343771	-0.0356008	0.4406	0.4501	0	0	0	0	1	0	0	0	0	0	0	0	0	0	0	0	0	0	0	0	0	0	1	0	0	0	0	0
322	726	DNA polymerase I	PA14_RS29510;PA14_72490	PA5493;-	PA14_RS29510;PA14_72490	false	false	52	52	1	1	1	0	0	0	5.26735	NaN	0	0	0	0	1	1	1	1	1	1	1	1	1	1	1	1	1	1	1	1	1	1	1	1	1	1	1	1	1	1	1	1
323	727	phage tail fiber protein	-	-	ACP77_RS11415;-	false	true	10	10	0.421773	0.587289	0.910793	0.0951524	0.374921	-0.0405802	5.3442	5.24905	0.374921	-0.0405802	0.4138	0.4537	0	0	0	0	0	1	0	1	0	0	0	1	1	0	0	0	0	0	0	1	0	0	0	1	0	0	0	0
324	729	toprim domain protein	-	-	Q009_RS28425;Q009_04227	false	false	7	7	0.409866	0.600523	0.816605	-0.227384	0.387358	0.0879881	5.07057	5.29796	0.387358	0.0879881	0.4082	0.4193	0	0	0	0	1	0	0	0	1	0	0	0	0	0	0	0	0	0	0	0	0	1	0	0	0	1	0	0
325	731	cystathionine gamma-synthase	PA14_RS28245;PA14_69300	PA5248;-	PA14_RS28245;PA14_69300	false	false	52	52	1	1	1	0	0	0	5.26735	NaN	0	0	0	0	1	1	1	1	1	1	1	1	1	1	1	1	1	1	1	1	1	1	1	1	1	1	1	1	1	1	1	1
326	733	aconitate hydratase	PA14_RS17990;PA14_44290	PA1562;-	PA14_RS17990;PA14_44290	false	false	51	51	0.128664	0.884806	0.205412	-3.06153	0.890542	0.687374	5.20847	8.27	0.890542	0.687374	0.1536	0.1582	1	1	1	1	1	1	1	1	1	1	1	1	1	1	1	1	1	1	1	1	1	1	1	1	1	1	1	1
327	735	DNA methylase	-	-	Q006_RS0106055;-	false	false	1	1	0.85681	0.158784	0.407391	2.01235	-0.799192	-0.389988	7.241	5.22865	-0.799192	-0.389988	0.1913	0.1918	0	0	0	0	0	0	0	0	0	0	0	0	0	0	0	0	0	0	0	0	0	0	0	0	0	0	0	0
328	737	hypothetical protein	-	-	PABE173_RS20250;PABE173_3742	false	true	1	1	0.193189	0.824547	0.384173	-2.11298	0.714017	0.415473	3.195	5.30798	0.714017	0.415473	0.2293	0.2301	0	0	0	0	0	0	0	0	0	0	0	0	1	0	0	0	0	0	0	0	0	0	0	0	0	0	0	0
329	739	tail protein	-	-	Q009_RS17860;Q009_02028	false	true	3	3	0.291347	0.721969	0.508563	-0.94698	0.535589	0.293655	4.375	5.32198	0.535589	0.293655	0.2961	0.2749	0	0	0	0	0	0	0	0	0	0	0	0	0	0	0	0	1	0	0	0	0	1	0	0	0	1	0	0
330	740	leucine--tRNA ligase	PA14_RS04955;PA14_12230	PA3987;-	PA14_RS04955;PA14_12230	false	false	52	52	1	1	1	0	0	0	5.26735	NaN	0	0	0	0	1	1	1	1	1	1	1	1	1	1	1	1	1	1	1	1	1	1	1	1	1	1	1	1	1	1	1	1
331	743	LuxR family transcriptional regulator	PA14_RS16955;PA14_41800	PA1760;-	PA14_RS16955;PA14_41800	false	false	52	52	1	1	1	0	0	0	5.26735	NaN	0	0	0	0	1	1	1	1	1	1	1	1	1	1	1	1	1	1	1	1	1	1	1	1	1	1	1	1	1	1	1	1
332	744	ribonuclease R	PA14_RS26655;PA14_65200	PA4937;-	PA14_RS26655;PA14_65200	false	false	52	52	1	1	1	0	0	0	5.26735	NaN	0	0	0	0	1	1	1	1	1	1	1	1	1	1	1	1	1	1	1	1	1	1	1	1	1	1	1	1	1	1	1	1
333	746	hypothetical protein	-	-	NQ81_RS02055;-	false	false	1	1	0.320458	0.703	0.566684	-1.39416	0.494228	0.246659	3.9	5.29416	0.494228	0.246659	0.3477	0.3494	0	0	0	0	0	0	0	0	0	0	0	0	0	0	0	0	0	0	1	0	0	0	0	0	0	0	0	0
334	748	transcriptional regulator	PA14_RS05290;PA14_13150	PA3921;-	PA14_RS05290;PA14_13150	false	false	51	51	0.806811	0.211979	0.393487	2.0722	-0.673707	-0.40507	5.3072	3.235	-0.673707	-0.40507	0.2502	0.2645	1	1	1	1	1	1	1	1	1	1	1	1	1	0	1	1	1	1	1	1	1	1	1	1	1	1	1	1
335	750	NADH-quinone oxidoreductase subunit G	PA14_RS12210;PA14_29940	PA2642;-	PA14_RS12210;PA14_29940	false	false	52	52	1	1	1	0	0	0	5.26735	NaN	0	0	0	0	1	1	1	1	1	1	1	1	1	1	1	1	1	1	1	1	1	1	1	1	1	1	1	1	1	1	1	1
336	751	toprim domain protein	-	-	ACP77_RS15570;-	false	false	4	4	0.998338	0.0018551	0.000417055	4.16802	-2.73163	-3.37981	9.11475	4.94673	-2.73163	-3.37981	0.0002	0.0002	0	0	0	0	0	0	0	0	0	0	0	0	0	0	0	0	0	0	0	0	0	0	0	0	0	0	0	0
337	753	hypothetical protein	-	-	Q000_RS14970;Q000_01672	false	false	1	1	0.158784	0.85681	0.307161	-2.47596	0.799192	0.512634	2.839	5.31496	0.799192	0.512634	0.1896	0.1988	0	0	0	0	0	0	0	0	0	0	1	0	0	0	0	0	0	0	0	0	0	0	0	0	0	0	0	0
338	756	ClpV1 family T6SS ATPase	PA14_RS00455;PA14_01100	PA0090;-	PA14_RS00455;PA14_01100	false	false	51	51	0.231797	0.788021	0.656942	-1.08145	0.634892	0.182473	5.24655	6.328	0.634892	0.182473	0.2704	0.2753	1	1	1	1	1	1	1	1	1	1	1	1	1	1	1	1	1	1	1	1	1	1	1	1	1	1	1	1
339	757	magnesium-translocating P-type ATPase	PA14_RS26090;PA14_63800	PA4825;-	PA14_RS26090;PA14_63800	false	false	52	52	1	1	1	0	0	0	5.26735	NaN	0	0	0	0	1	1	1	1	1	1	1	1	1	1	1	1	1	1	1	1	1	1	1	1	1	1	1	1	1	1	1	1
340	758	helix-turn-helix transcriptional regulator	PA14_RS16960;PA14_41810	PA1759;-	PA14_RS16960;PA14_41810	false	false	52	52	1	1	1	0	0	0	5.26735	NaN	0	0	0	0	1	1	1	1	1	1	1	1	1	1	1	1	1	1	1	1	1	1	1	1	1	1	1	1	1	1	1	1
341	759	carbonate dehydratase	PA14_RS18660;PA14_45970	PA1429;-	PA14_RS18660;PA14_45970	false	false	48	48	0.438594	0.574905	0.791522	-0.331938	0.357937	0.101537	5.24181	5.57375	0.357937	0.101537	0.4277	0.3805	1	1	1	1	1	1	1	1	1	1	1	1	0	1	1	1	1	1	1	1	1	1	0	1	0	1	1	1
342	760	bifunctional diguanylate cyclase/phosphodiesterase	PA14_RS27070;PA14_66320	PA5017;-	PA14_RS27070;PA14_66320	false	false	50	50	0.621452	0.396772	0.99769	0.00504	-0.40146	-0.0010045	5.26754	5.2625	-0.40146	-0.0010045	0.377	0.511	1	1	0	1	1	1	1	1	1	1	1	1	1	1	1	1	1	1	1	1	1	1	1	1	1	1	1	1
343	765	bifunctional uridylyltransferase/uridylyl-removing protein	PA14_RS06835;PA14_17040	PA3658;-	PA14_RS06835;PA14_17040	false	false	52	52	1	1	1	0	0	0	5.26735	NaN	0	0	0	0	1	1	1	1	1	1	1	1	1	1	1	1	1	1	1	1	1	1	1	1	1	1	1	1	1	1	1	1
344	769	CRISPR-associated helicase/endonuclease Cas3	-	-	Q006_RS09245;Q006_00590	false	false	12	12	0.192488	0.813396	0.553366	-0.470075	0.715595	0.256988	4.90575	5.37582	0.715595	0.256988	0.2019	0.2893	1	0	1	0	1	0	0	0	0	1	0	0	0	1	0	0	0	0	1	0	0	0	0	1	0	1	0	0
345	772	DNA mismatch repair protein MutS	PA14_RS07025;PA14_17500	PA3620;-	PA14_RS07025;PA14_17500	false	false	52	52	1	1	1	0	0	0	5.26735	NaN	0	0	0	0	1	1	1	1	1	1	1	1	1	1	1	1	1	1	1	1	1	1	1	1	1	1	1	1	1	1	1	1
346	774	transporter	PA14_RS24815;PA14_60760	PA4591;-	PA14_RS24815;PA14_60760	false	false	104	52	1	1	1	0	0	0	5.26735	NaN	0	0	0	0	2	2	2	2	2	2	2	2	2	2	2	2	2	2	2	2	2	2	2	2	2	2	2	2	2	2	2	2
347	775	conjugal transfer protein TraI	-	-	NS12_RS28245;-	false	false	1	1	0.211979	0.806811	0.393487	-2.0722	0.673707	0.40507	3.235	5.3072	0.673707	0.40507	0.2502	0.2516	0	0	0	0	0	0	0	0	0	0	0	0	0	1	0	0	0	0	0	0	0	0	0	0	0	0	0	0
348	776	phage protein	-	-	NS42_RS13305;-	false	false	5	5	0.976516	0.0252592	0.0684033	2.03492	-1.59758	-1.16492	7.1066	5.07168	-1.59758	-1.16492	0.0201	0.0378	0	0	0	0	0	0	0	0	0	0	0	0	0	0	0	0	0	0	0	0	0	0	0	0	0	0	0	0
349	777	TonB-dependent receptor	-	-	NQ81_RS26750;-	false	false	1	1	0.320458	0.703	0.566684	-1.39416	0.494228	0.246659	3.9	5.29416	0.494228	0.246659	0.3477	0.3494	0	0	0	0	0	0	0	0	0	0	0	0	0	0	0	0	0	0	1	0	0	0	0	0	0	0	0	0
350	778	hypothetical protein	-	-	NQ67_RS01810;-	false	false	1	1	0.92866	0.0808686	0.103292	3.918	-1.09222	-0.985933	9.11	5.192	-1.09222	-0.985933	0.0776	0.0812	0	0	0	0	0	0	0	0	0	0	0	0	0	0	0	0	0	0	0	0	0	0	0	0	0	0	0	0
351	780	DNA repair protein	-	-	NS72_RS01060;-	false	false	1	1	0.897242	0.115194	0.170482	3.30929	-0.93857	-0.768321	8.513	5.20371	-0.93857	-0.768321	0.1357	0.137	0	0	0	0	0	0	0	0	0	0	0	0	0	0	0	0	0	0	0	0	0	0	0	0	0	0	0	0
352	782	hypothetical protein	-	-	NS72_RS03745;-	false	false	1	1	0.897242	0.115194	0.170482	3.30929	-0.93857	-0.768321	8.513	5.20371	-0.93857	-0.768321	0.1357	0.137	0	0	0	0	0	0	0	0	0	0	0	0	0	0	0	0	0	0	0	0	0	0	0	0	0	0	0	0
353	785	phage tail tape measure protein	-	-	NT42_RS12500;-	false	false	4	4	0.780141	0.230157	0.630328	0.603854	-0.637975	-0.200434	5.82475	5.2209	-0.637975	-0.200434	0.2262	0.3101	1	0	0	0	0	0	0	0	0	0	0	0	0	0	0	0	0	0	0	0	0	0	0	0	0	0	0	0
354	788	hypothetical protein	-	-	NQ67_RS22130;-	false	false	1	1	0.92866	0.0808686	0.103292	3.918	-1.09222	-0.985933	9.11	5.192	-1.09222	-0.985933	0.0776	0.0812	0	0	0	0	0	0	0	0	0	0	0	0	0	0	0	0	0	0	0	0	0	0	0	0	0	0	0	0
355	790	hypothetical protein	PA14_RS08645;-	PA3290;-	PA14_RS08645;-	false	false	51	51	0.473438	0.553007	0.985764	-0.0434902	0.324737	0.00622704	5.26651	5.31	0.324737	0.00622704	0.4568	0.4613	1	1	1	1	1	1	1	1	1	1	1	1	1	1	1	1	1	1	1	1	1	1	1	1	1	1	1	0
356	792	ligand-gated channel	PA14_RS08010;PA14_20010	PA3408;-	PA14_RS08010;PA14_20010	false	false	49	49	0.278031	0.734981	0.529789	-0.900259	0.555907	0.275897	5.21541	6.11567	0.555907	0.275897	0.2712	0.2585	1	1	1	1	1	1	1	1	1	1	1	0	1	1	1	1	1	1	1	1	1	1	1	1	1	1	1	1
357	793	cell division protein FtsK	-	-	NR39_RS08945;-	false	false	1	1	0.841216	0.175453	0.56205	1.41078	-0.75584	-0.250225	6.651	5.24022	-0.75584	-0.250225	0.2068	0.2079	0	0	0	0	0	0	0	0	0	0	0	0	0	0	0	0	0	0	0	0	0	0	0	0	0	0	0	0
358	794	hypothetical protein	-	-	NT49_RS27920;-	false	false	1	1	0.27436	0.747394	0.463851	-1.78059	0.561679	0.333622	3.521	5.30159	0.561679	0.333622	0.3131	0.3252	0	0	0	0	0	0	0	0	0	0	0	0	0	0	0	0	1	0	0	0	0	0	0	0	0	0	0	0
359	799	histidinol-phosphatase	-	-	NS72_RS14875;-	false	false	1	1	0.897242	0.115194	0.170482	3.30929	-0.93857	-0.768321	8.513	5.20371	-0.93857	-0.768321	0.1357	0.137	0	0	0	0	0	0	0	0	0	0	0	0	0	0	0	0	0	0	0	0	0	0	0	0	0	0	0	0
360	804	endonuclease	-	-	Q012_RS15380;Q012_01632	false	false	2	2	0.566136	0.452653	0.979668	0.04436	-0.344234	-0.00892107	5.31	5.26564	-0.344234	-0.00892107	0.4348	0.4774	0	0	0	0	0	0	0	0	0	0	0	0	0	0	0	0	0	0	0	0	0	0	0	0	0	1	0	0
361	805	TonB system transporter	PA14_RS15345;PA14_37730	PA2070;-	PA14_RS15345;PA14_37730	false	false	51	51	0.115194	0.897242	0.170482	-3.30929	0.93857	0.768321	5.20371	8.513	0.93857	0.768321	0.1357	0.1393	1	1	1	1	1	1	1	1	1	1	1	1	1	1	1	1	1	1	1	1	1	1	1	1	1	1	1	1
362	806	ShlB family hemolysin secretion/activation protein	PA14_RS00205;PA14_00490	PA0040;-	PA14_RS00205;PA14_00490	false	false	56	46	0.848758	0.158056	0.269726	1.14929	-0.801189	-0.569077	5.39996	4.25067	-0.801189	-0.569077	0.1616	0.1378	1	1	1	2	2	1	1	1	0	2	1	1	0	1	1	1	1	2	0	1	1	2	1	0	1	0	1	1
363	809	membrane protein	PA14_RS12475;PA14_30590	PA2590;-	PA14_RS12475;PA14_30590	false	false	49	49	0.667025	0.347357	0.662254	0.62649	-0.459225	-0.178975	5.30349	4.677	-0.459225	-0.178975	0.3441	0.3517	1	1	1	1	1	1	1	0	1	1	1	1	1	1	1	1	1	1	1	1	1	1	1	1	1	1	0	1
364	810	aminopeptidase N	PA14_RS09830;PA14_24270	PA3083;-	PA14_RS09830;PA14_24270	false	false	52	52	1	1	1	0	0	0	5.26735	NaN	0	0	0	0	1	1	1	1	1	1	1	1	1	1	1	1	1	1	1	1	1	1	1	1	1	1	1	1	1	1	1	1
365	811	histidine kinase	PA14_RS17615;PA14_43350	PA1636;-	PA14_RS17615;PA14_43350	true	false	51	50	0.0609939	0.94454	0.123289	-2.6506	1.21471	0.909075	5.1654	7.816	1.21471	0.909075	0.0608	0.0657	1	1	1	1	1	1	1	1	1	1	1	1	1	2	1	1	1	1	1	1	1	1	1	1	1	1	1	1
366	812	hypothetical protein	-	-	NS72_RS02020;-	false	false	1	1	0.897242	0.115194	0.170482	3.30929	-0.93857	-0.768321	8.513	5.20371	-0.93857	-0.768321	0.1357	0.137	0	0	0	0	0	0	0	0	0	0	0	0	0	0	0	0	0	0	0	0	0	0	0	0	0	0	0	0
367	813	hypothetical protein	-	-	Q000_RS35590;Q000_05893	false	false	2	1	0.158784	0.85681	0.307161	-2.47596	0.799192	0.512634	2.839	5.31496	0.799192	0.512634	0.1896	0.1988	0	0	0	0	0	0	0	0	0	0	2	0	0	0	0	0	0	0	0	0	0	0	0	0	0	0	0	0
368	815	phage tail tape measure protein	-	-	NS12_RS00500;-	false	true	1	1	0.211979	0.806811	0.393487	-2.0722	0.673707	0.40507	3.235	5.3072	0.673707	0.40507	0.2502	0.2516	0	0	0	0	0	0	0	0	0	0	0	0	0	1	0	0	0	0	0	0	0	0	0	0	0	0	0	0
369	817	membrane protein	PA14_RS15255;PA14_37490	PA2089;-	PA14_RS15255;PA14_37490	false	false	50	50	0.342935	0.674383	0.53883	-1.06772	0.464788	0.268548	5.22628	6.294	0.464788	0.268548	0.3297	0.2621	1	1	1	1	1	1	1	1	1	1	1	1	0	1	1	1	1	1	1	1	1	1	1	1	1	1	1	1
370	818	excinuclease ABC subunit A paralog of unknown function	-	-	Q002_RS15195;Q002_01733	false	false	9	9	0.985258	0.0156686	0.0717486	1.56751	-1.80497	-1.14419	6.56356	4.99605	-1.80497	-1.14419	0.0133	0.0412	0	1	0	0	0	0	0	0	0	0	0	0	0	0	0	0	0	0	0	0	0	0	0	0	0	0	0	0
371	819	hypothetical protein	-	-	NS00_RS06860;-	false	false	1	1	0.252606	0.768203	0.451335	-1.83055	0.597556	0.345501	3.472	5.30255	0.597556	0.345501	0.2811	0.2835	0	0	0	0	0	0	0	0	0	0	0	0	0	0	0	1	0	0	0	0	0	0	0	0	0	0	0	0
372	820	pyruvate dehydrogenase E1 component	PA14_RS27060;PA14_66290	PA5015;-	PA14_RS27060;PA14_66290	false	false	52	52	1	1	1	0	0	0	5.26735	NaN	0	0	0	0	1	1	1	1	1	1	1	1	1	1	1	1	1	1	1	1	1	1	1	1	1	1	1	1	1	1	1	1
373	821	type III restriction endonuclease subunit R	-	-	NR50_RS26520;-	false	false	1	1	0.655343	0.369508	0.829501	0.524745	-0.432376	-0.0811833	5.782	5.25725	-0.432376	-0.0811833	0.3748	0.3808	0	0	0	0	0	0	0	0	0	0	0	0	0	0	0	0	0	0	0	0	0	0	0	0	0	0	0	0
374	823	ATPase	-	-	NT05_RS21320;-	false	false	1	1	0.446993	0.579218	0.850544	-0.459176	0.349699	0.0703031	4.817	5.27618	0.349699	0.0703031	0.4394	0.4547	0	0	0	0	0	0	0	0	0	0	0	0	0	0	0	0	0	0	0	0	0	0	0	1	0	0	0	0
375	826	membrane protein	PA14_RS21320;PA14_52350	PA0920;-	PA14_RS21320;PA14_52350	false	false	51	51	0.07134	0.937302	0.0796457	-4.20655	1.14667	1.09884	5.18645	9.393	1.14667	1.09884	0.0581	0.0631	1	1	1	1	1	1	1	1	1	1	1	1	1	1	1	1	1	1	1	1	1	1	1	1	1	1	1	1
376	827	hybrid sensor histidine kinase/response regulator	PA14_RS15820;PA14_38970	PA1976;-	PA14_RS15820;PA14_38970	false	false	52	52	1	1	1	0	0	0	5.26735	NaN	0	0	0	0	1	1	1	1	1	1	1	1	1	1	1	1	1	1	1	1	1	1	1	1	1	1	1	1	1	1	1	1
377	829	usher protein	PA14_RS04470;PA14_11080	PA4084;-	PA14_RS04470;PA14_11080	false	false	51	51	0.824547	0.193189	0.384173	2.11298	-0.714017	-0.415473	5.30798	3.195	-0.714017	-0.415473	0.2293	0.2438	1	1	1	1	1	1	1	1	1	1	1	1	0	1	1	1	1	1	1	1	1	1	1	1	1	1	1	1
378	831	hypothetical protein	PA14_RS19485;PA14_47930	PA1259;-	PA14_RS19485;PA14_47930	false	false	52	52	1	1	1	0	0	0	5.26735	NaN	0	0	0	0	1	1	1	1	1	1	1	1	1	1	1	1	1	1	1	1	1	1	1	1	1	1	1	1	1	1	1	1
379	832	phosphoenolpyruvate carboxylase	PA14_RS06690;PA14_16690	PA3687;-	PA14_RS06690;PA14_16690	false	false	52	52	1	1	1	0	0	0	5.26735	NaN	0	0	0	0	1	1	1	1	1	1	1	1	1	1	1	1	1	1	1	1	1	1	1	1	1	1	1	1	1	1	1	1
380	833	chromosome segregation ATPase	-	-	NR39_RS08910;-	false	false	1	1	0.841216	0.175453	0.56205	1.41078	-0.75584	-0.250225	6.651	5.24022	-0.75584	-0.250225	0.2068	0.2079	0	0	0	0	0	0	0	0	0	0	0	0	0	0	0	0	0	0	0	0	0	0	0	0	0	0	0	0
381	834	cbb3-type cytochrome c oxidase subunit I	PA14_RS04235;PA14_10500	PA1554;-	PA14_RS04235;PA14_10500	false	false	178	52	1	1	1	0	0	0	5.26735	NaN	0	0	0	0	4	4	1	4	4	3	4	4	4	4	4	3	2	4	4	3	2	4	4	3	1	3	3	4	4	2	2	4
382	836	ClpV1 family T6SS ATPase	PA14_RS17460;PA14_42980	PA1662;-	PA14_RS17460;PA14_42980	false	false	50	50	0.0609939	0.94454	0.162522	-2.40724	1.21471	0.789088	5.17476	7.582	1.21471	0.789088	0.0584	0.0902	1	1	1	1	1	1	1	1	1	1	1	1	1	1	1	1	1	1	1	1	1	1	1	1	1	1	1	1
383	840	DNA methylase N-4	-	-	ACP77_RS11180;-	false	false	2	2	0.912474	0.0953412	0.126485	2.62876	-1.02072	-0.897959	7.795	5.16624	-1.02072	-0.897959	0.098	0.0666	0	0	0	0	0	0	0	0	0	0	0	0	0	0	0	0	0	0	0	0	0	0	0	0	0	0	0	0
384	841	Fe/S-dependent 2-methylisocitrate dehydratase AcnD	PA14_RS21980;PA14_53970	PA0794;-	PA14_RS21980;PA14_53970	false	false	49	49	0.772072	0.239957	0.633472	0.683796	-0.619867	-0.198273	5.3068	4.623	-0.619867	-0.198273	0.2411	0.333	1	1	1	1	0	1	1	1	1	1	1	0	1	1	1	1	1	1	1	1	1	1	1	1	1	1	1	1
385	842	usher CupA3	PA14_RS15075;PA14_37030	PA2130;-	PA14_RS15075;PA14_37030	false	false	51	51	0.747394	0.27436	0.463851	1.78059	-0.561679	-0.333622	5.30159	3.521	-0.561679	-0.333622	0.3131	0.3295	1	1	1	1	1	1	1	1	1	1	1	1	1	1	1	1	0	1	1	1	1	1	1	1	1	1	1	1
386	845	DNA repair ATPase	-	-	ACP77_RS15155;-	false	false	3	3	0.902364	0.104577	0.181099	1.90276	-0.980564	-0.742083	7.06033	5.15757	-0.980564	-0.742083	0.1012	0.0983	0	0	0	0	0	0	0	0	0	0	0	0	0	0	0	0	0	0	0	0	0	0	0	0	0	0	0	0
387	847	hypothetical protein	-	-	NT38_RS19325;-	false	false	1	1	0.9584	0.0478789	0.024915	5.33016	-1.31986	-1.60354	10.495	5.16484	-1.31986	-1.60354	0	0.0007	0	0	0	0	0	0	0	0	0	0	0	0	0	0	0	0	0	0	0	0	0	0	0	0	0	0	0	0
388	849	alanine--tRNA ligase	PA14_RS21420;PA14_52600	PA0903;-	PA14_RS21420;PA14_52600	false	false	53	52	1	1	1	0	0	0	5.26735	NaN	0	0	0	0	1	1	1	1	1	1	1	1	1	1	1	1	1	1	1	1	1	1	1	1	2	1	1	1	1	1	1	1
389	850	ATPase	-	-	ACP77_RS12025;-	false	false	11	11	0.191099	0.814943	0.422544	-0.655224	0.718741	0.374129	4.75073	5.40595	0.718741	0.374129	0.1871	0.2128	0	1	1	0	0	0	0	1	0	0	0	0	0	0	0	0	0	1	1	0	0	0	0	1	0	0	0	1
390	857	beta-(1-3)-glucosyl transferase	PA14_RS20055;PA14_49360	PA1163;-	PA14_RS20055;PA14_49360	false	false	52	52	1	1	1	0	0	0	5.26735	NaN	0	0	0	0	1	1	1	1	1	1	1	1	1	1	1	1	1	1	1	1	1	1	1	1	1	1	1	1	1	1	1	1
391	858	hypothetical protein	-	-	PA103_RS06120;PA103_1193	false	false	2	2	0.639409	0.378548	0.867752	0.2898	-0.421879	-0.0616045	5.546	5.2562	-0.421879	-0.0616045	0.3577	0.4162	0	0	0	0	0	0	0	0	0	0	0	0	0	0	0	0	0	0	0	0	0	0	0	0	0	0	0	1
392	859	phosphomannomutase/phosphoglucomutase	PA14_RS28620;PA14_70270	PA5322;-	PA14_RS28620;PA14_70270	false	false	52	52	1	1	1	0	0	0	5.26735	NaN	0	0	0	0	1	1	1	1	1	1	1	1	1	1	1	1	1	1	1	1	1	1	1	1	1	1	1	1	1	1	1	1
393	860	hypothetical protein	-	-	L683_RS44880;L683_08995	false	false	1	1	0.0626977	0.945106	0.203929	-3.07141	1.20275	0.690521	2.255	5.32641	1.20275	0.690521	0.0322	0.0355	0	0	1	0	0	0	0	0	0	0	0	0	0	0	0	0	0	0	0	0	0	0	0	0	0	0	0	0
394	861	hypothetical protein	-	-	NS72_RS03750;-	false	false	1	1	0.897242	0.115194	0.170482	3.30929	-0.93857	-0.768321	8.513	5.20371	-0.93857	-0.768321	0.1357	0.137	0	0	0	0	0	0	0	0	0	0	0	0	0	0	0	0	0	0	0	0	0	0	0	0	0	0	0	0
395	862	usher	-	-	PACI27_RS25795;-	false	false	3	3	0.5	0.515653	0.812952	-0.339605	0.30103	0.089935	4.94733	5.28694	0.30103	0.089935	0.4815	0.4247	0	0	0	0	0	0	0	0	0	0	0	1	0	0	0	0	0	0	0	0	0	0	0	0	0	0	0	0
396	865	DNA topoisomerase 1	PA14_RS10185;PA14_25110	PA3011;-	PA14_RS10185;PA14_25110	false	false	52	52	1	1	1	0	0	0	5.26735	NaN	0	0	0	0	1	1	1	1	1	1	1	1	1	1	1	1	1	1	1	1	1	1	1	1	1	1	1	1	1	1	1	1
397	866	aconitate hydratase B	PA14_RS16815;PA14_41470	PA1787;-	PA14_RS16815;PA14_41470	false	false	51	51	0.605082	0.420782	0.789046	0.651882	-0.375943	-0.102898	5.27988	4.628	-0.375943	-0.102898	0.4142	0.431	1	1	1	1	1	1	1	1	1	1	1	1	1	1	1	1	1	1	1	1	1	1	0	1	1	1	1	1
398	867	hypothetical protein	-	-	Q000_RS19815;Q000_02666	false	false	2	2	0.603228	0.415223	0.744503	0.56696	-0.381718	-0.128134	5.8125	5.24554	-0.381718	-0.128134	0.3994	0.3705	0	0	0	0	0	0	0	0	0	0	1	0	0	0	0	0	0	0	0	0	0	0	0	0	0	0	0	0
399	868	hypothetical protein	PA14_RS06255;PA14_15610	-	PA14_RS06255;PA14_15610	false	false	2	2	0.0412095	0.962821	0.121909	-2.66016	1.385	0.913963	2.7095	5.36966	1.385	0.913963	0.0369	0.0461	0	0	0	1	0	0	0	0	0	0	0	1	0	0	0	0	0	0	0	0	0	0	0	0	0	0	0	0
400	871	autotransporter	-	-	NS72_RS02755;-	false	false	1	1	0.897242	0.115194	0.170482	3.30929	-0.93857	-0.768321	8.513	5.20371	-0.93857	-0.768321	0.1357	0.137	0	0	0	0	0	0	0	0	0	0	0	0	0	0	0	0	0	0	0	0	0	0	0	0	0	0	0	0
401	872	bifunctional diguanylate cyclase/phosphodiesterase	PA14_RS15335;PA14_37690	PA2072;-	PA14_RS15335;PA14_37690	false	false	50	50	0.216186	0.797499	0.366034	-1.56692	0.665172	0.436478	5.20708	6.774	0.665172	0.436478	0.2213	0.1912	1	1	1	1	1	1	1	1	1	1	1	1	1	1	1	1	1	1	1	1	1	1	1	1	0	1	1	1
402	873	DEAD/DEAH box helicase	-	-	PABE177_RS24665;PABE177_4603	false	false	1	1	0.344657	0.679542	0.628769	-1.17698	0.462613	0.201509	4.113	5.28998	0.462613	0.201509	0.3642	0.366	0	0	0	0	0	0	0	0	0	0	0	0	0	0	0	0	0	0	0	1	0	0	0	0	0	0	0	0
403	874	hypothetical protein	-	-	P998_RS0106105;-	false	true	3	3	0.915222	0.0910383	0.255696	1.62118	-1.04078	-0.592276	6.795	5.17382	-1.04078	-0.592276	0.0917	0.1371	0	0	0	0	0	0	0	0	0	0	0	0	0	0	0	0	0	0	0	0	0	0	0	0	0	0	0	0
404	875	type VI secretion protein	PA14_RS13905;PA14_34100	PA2363;-	PA14_RS13905;PA14_34100	true	false	97	51	0.115194	0.897242	0.170482	-3.30929	0.93857	0.768321	5.20371	8.513	0.93857	0.768321	0.1357	0.1393	2	2	1	2	2	2	2	2	2	2	2	2	1	2	2	2	1	2	2	1	1	2	2	2	2	2	2	2
405	880	hypothetical protein	-	-	PACIG1_RS30855;PACIG1_5870	false	false	1	1	0.369508	0.655343	0.715611	-0.887412	0.432376	0.145323	4.397	5.28441	0.432376	0.145323	0.3769	0.3771	0	0	0	0	0	0	0	0	0	0	0	0	0	0	0	0	0	0	0	0	1	0	0	0	0	0	0	0
406	883	phage tail tape measure protein	-	-	NS42_RS31285;-	false	false	2	2	0.912474	0.0953412	0.2283	2.08172	-1.02072	-0.641494	7.269	5.18728	-1.02072	-0.641494	0.1023	0.1332	0	0	0	0	0	0	0	0	0	0	0	0	0	0	0	0	0	0	0	0	0	0	0	0	0	0	0	0
407	887	glucan biosynthesis protein H	PA14_RS27370;PA14_67065	PA5077;-	PA14_RS27370;PA14_67065	true	false	52	52	1	1	1	0	0	0	5.26735	NaN	0	0	0	0	1	1	1	1	1	1	1	1	1	1	1	1	1	1	1	1	1	1	1	1	1	1	1	1	1	1	1	1
408	889	flavodoxin	PA14_RS23880;PA14_58560	PA4513;-	PA14_RS23880;PA14_58560	false	false	52	52	1	1	1	0	0	0	5.26735	NaN	0	0	0	0	1	1	1	1	1	1	1	1	1	1	1	1	1	1	1	1	1	1	1	1	1	1	1	1	1	1	1	1
409	892	hybrid sensor histidine kinase/response regulator	PA14_RS19565;PA14_48160	PA1243;-	PA14_RS19565;PA14_48160	false	false	52	52	1	1	1	0	0	0	5.26735	NaN	0	0	0	0	1	1	1	1	1	1	1	1	1	1	1	1	1	1	1	1	1	1	1	1	1	1	1	1	1	1	1	1
410	893	hypothetical protein	-	-	NT47_RS17420;-	false	false	1	1	0.703	0.320458	0.734059	0.827569	-0.494228	-0.134269	6.079	5.25143	-0.494228	-0.134269	0.34	0.349	0	0	0	0	0	0	0	0	0	0	0	0	0	0	0	0	0	0	0	0	0	0	0	0	0	0	0	0
411	894	hypothetical protein	-	-	P998_RS0106280;-	false	false	1	1	0.679542	0.344657	0.80835	0.59102	-0.462613	-0.0924004	5.847	5.25598	-0.462613	-0.0924004	0.3711	0.3733	0	0	0	0	0	0	0	0	0	0	0	0	0	0	0	0	0	0	0	0	0	0	0	0	0	0	0	0
412	896	hypothetical protein	PA14_RS28550;PA14_70070	PA5307;-	PA14_RS28550;PA14_70070	false	false	51	51	0.605082	0.420782	0.789046	0.651882	-0.375943	-0.102898	5.27988	4.628	-0.375943	-0.102898	0.4142	0.431	1	1	1	1	1	1	1	1	1	1	1	1	1	1	1	1	1	1	1	1	1	1	0	1	1	1	1	1
413	897	ATP-dependent helicase	-	PA3961;-	PA3961;-	false	false	50	50	0.509491	0.509491	0.732534	-0.59452	-0.292864	0.135172	5.24448	5.839	-0.292864	0.135172	0.4811	0.3701	1	1	1	0	1	1	1	1	1	1	1	1	1	1	1	1	1	1	1	1	1	1	1	1	1	1	1	1
414	898	hypothetical protein	-	-	NT88_RS29615;-	false	false	5	5	0.586006	0.426127	0.960324	0.0564851	-0.370461	-0.0175822	5.3184	5.26191	-0.370461	-0.0175822	0.4111	0.4603	0	0	0	0	0	0	0	1	0	0	0	0	0	0	0	0	1	0	0	0	0	0	0	0	0	0	0	0
415	902	chaperone protein ClpB	PA14_RS24560;PA14_60190	PA4542;-	PA14_RS24560;PA14_60190	false	false	52	52	1	1	1	0	0	0	5.26735	NaN	0	0	0	0	1	1	1	1	1	1	1	1	1	1	1	1	1	1	1	1	1	1	1	1	1	1	1	1	1	1	1	1
416	904	exoprotein with autotransporter	-	-	NR40_RS22365;-	false	false	5	5	0.983895	0.0173969	0.0543688	2.14423	-1.75953	-1.26465	7.2054	5.06117	-1.75953	-1.26465	0.0151	0.0322	0	0	0	0	0	0	0	0	0	0	0	0	0	0	0	0	0	0	0	0	0	0	0	0	0	1	0	0
417	906	hypothetical protein	-	-	Q000_RS27230;Q000_04192	false	false	4	4	0.0205123	0.981128	0.0406212	-2.51831	1.68799	1.39125	2.94275	5.46106	1.68799	1.39125	0.0171	0.0114	0	0	0	0	0	0	0	0	1	1	1	0	0	0	0	1	0	0	0	0	0	0	0	0	0	0	0	0
418	909	ATP-dependent DNA ligase	PA14_RS15030;PA14_36910	PA2138;-	PA14_RS15030;PA14_36910	false	false	43	43	0.0767736	0.926652	0.137495	-1.29958	1.11479	0.861713	5.04242	6.342	1.11479	0.861713	0.0768	0.071	1	1	1	1	1	1	1	1	1	1	1	1	1	1	1	1	0	1	1	0	0	1	1	1	1	1	0	1
419	912	TonB-dependent receptor	PA14_RS19265;PA14_47380	PA1302;-	PA14_RS19265;PA14_47380	false	false	52	52	1	1	1	0	0	0	5.26735	NaN	0	0	0	0	1	1	1	1	1	1	1	1	1	1	1	1	1	1	1	1	1	1	1	1	1	1	1	1	1	1	1	1
420	915	hypothetical protein	-	-	Q009_RS21075;Q009_02695	false	false	2	2	0.275988	0.739689	0.51229	-1.13812	0.55911	0.290484	4.173	5.31112	0.55911	0.290484	0.2729	0.2782	0	0	0	0	0	0	0	0	0	0	0	0	0	0	0	0	0	1	0	0	0	1	0	0	0	0	0	0
421	917	ClpV1 family T6SS ATPase	PA14_RS13865;PA14_33990	PA2371;-	PA14_RS13865;PA14_33990	true	false	50	50	0.769607	0.245107	0.432952	1.36068	-0.610645	-0.36356	5.31968	3.959	-0.610645	-0.36356	0.2499	0.2342	1	1	1	1	1	1	1	1	1	1	1	1	1	1	1	1	0	1	1	1	0	1	1	1	1	1	1	1
422	918	siderophore receptor	PA14_RS18950;PA14_46640	PA1365;-	PA14_RS18950;PA14_46640	false	false	49	49	0.908962	0.0976357	0.227398	1.72026	-1.01039	-0.643213	5.36659	3.64633	-1.01039	-0.643213	0.0943	0.1107	1	1	1	1	1	1	0	1	1	1	1	1	1	0	1	1	1	1	1	1	1	1	1	1	0	1	1	1
423	927	acyl-homoserine lactone acylase subunit beta	PA14_RS20715;PA14_50980	PA1032;-	PA14_RS20715;PA14_50980	false	false	52	52	1	1	1	0	0	0	5.26735	NaN	0	0	0	0	1	1	1	1	1	1	1	1	1	1	1	1	1	1	1	1	1	1	1	1	1	1	1	1	1	1	1	1
424	928	toll-Interleukin receptor	-	-	PA103_RS08420;PA103_1646	false	false	1	1	0.553007	0.473438	0.985764	0.0434902	-0.324737	-0.00622704	5.31	5.26651	-0.324737	-0.00622704	0.4568	0.4626	0	0	0	0	0	0	0	0	0	0	0	0	0	0	0	0	0	0	0	0	0	0	0	0	0	0	0	1
425	929	hypothetical protein	-	-	Q009_RS38300;Q009_06268	false	false	2	2	0.275988	0.739689	0.51229	-1.13812	0.55911	0.290484	4.173	5.31112	0.55911	0.290484	0.2729	0.2782	0	0	0	0	0	0	0	0	0	0	0	0	0	0	0	0	0	1	0	0	0	1	0	0	0	0	0	0
426	932	N-acetyl-D-glucosamine phosphotransferase system transporter	PA14_RS06320;PA14_15790	PA3760;-	PA14_RS06320;PA14_15790	false	false	52	52	1	1	1	0	0	0	5.26735	NaN	0	0	0	0	1	1	1	1	1	1	1	1	1	1	1	1	1	1	1	1	1	1	1	1	1	1	1	1	1	1	1	1
427	933	hypothetical protein	-	-	Q000_RS35580;-	false	false	1	1	0.158784	0.85681	0.307161	-2.47596	0.799192	0.512634	2.839	5.31496	0.799192	0.512634	0.1896	0.1988	0	0	0	0	0	0	0	0	0	0	1	0	0	0	0	0	0	0	0	0	0	0	0	0	0	0	0	0
428	938	hypothetical protein	-	-	NS42_RS25725;-	false	false	2	2	0.912474	0.0953412	0.2283	2.08172	-1.02072	-0.641494	7.269	5.18728	-1.02072	-0.641494	0.1023	0.1332	0	0	0	0	0	0	0	0	0	0	0	0	0	0	0	0	0	0	0	0	0	0	0	0	0	0	0	0
429	939	usher CupC3	-	-	NR92_RS19280;-	false	false	2	2	0.566136	0.452653	0.975141	0.05424	-0.344234	-0.0109326	5.3195	5.26526	-0.344234	-0.0109326	0.4311	0.4709	0	0	0	0	0	0	0	0	0	0	0	0	0	0	0	0	0	0	0	0	0	0	0	0	0	0	1	0
430	940	phage tail tape measure protein	-	-	NT88_RS14440;-	false	true	4	4	0.385183	0.627878	0.828692	-0.27175	0.414333	0.081607	5.0165	5.28825	0.414333	0.081607	0.3805	0.4342	0	0	0	0	0	1	0	0	0	0	0	0	1	0	0	0	0	0	0	0	0	0	0	0	0	0	0	0
431	943	hypothetical protein	-	-	PACIG1_RS03440;PACIG1_0655	false	false	5	5	0.450594	0.561669	0.953026	0.0668851	0.346215	-0.0208951	5.3278	5.26091	0.346215	-0.0208951	0.4403	0.4655	0	0	0	0	0	0	0	0	0	0	0	0	1	0	0	1	0	0	0	0	1	0	0	0	0	1	0	0
432	946	usher CupC3	PA14_RS20920;PA14_51450	PA0994;-	PA14_RS20920;PA14_51450	false	false	52	52	1	1	1	0	0	0	5.26735	NaN	0	0	0	0	1	1	1	1	1	1	1	1	1	1	1	1	1	1	1	1	1	1	1	1	1	1	1	1	1	1	1	1
433	947	translation initiation factor IF-2	PA14_RS25650;PA14_62760	PA4744;-	PA14_RS25650;PA14_62760	false	false	50	50	0.292115	0.724012	0.523263	-1.1088	0.534447	0.28128	5.2247	6.3335	0.534447	0.28128	0.2927	0.2574	1	1	1	1	1	1	1	1	1	1	1	1	1	1	1	1	1	1	1	1	0	1	1	1	1	1	1	1
434	950	hypothetical protein	-	-	PACIG1_RS30850;-	false	false	1	1	0.369508	0.655343	0.715611	-0.887412	0.432376	0.145323	4.397	5.28441	0.432376	0.145323	0.3769	0.3771	0	0	0	0	0	0	0	0	0	0	0	0	0	0	0	0	0	0	0	0	1	0	0	0	0	0	0	0
435	951	ATPase	-	-	L683_RS63995;L683_26720	false	false	1	1	0.0626977	0.945106	0.203929	-3.07141	1.20275	0.690521	2.255	5.32641	1.20275	0.690521	0.0322	0.0355	0	0	1	0	0	0	0	0	0	0	0	0	0	0	0	0	0	0	0	0	0	0	0	0	0	0	0	0
436	954	alkaline phosphatase	-	-	NR50_RS27165;-	false	false	1	1	0.655343	0.369508	0.829501	0.524745	-0.432376	-0.0811833	5.782	5.25725	-0.432376	-0.0811833	0.3748	0.3808	0	0	0	0	0	0	0	0	0	0	0	0	0	0	0	0	0	0	0	0	0	0	0	0	0	0	0	0
437	955	ferredoxin	PA14_RS29095;PA14_71430	PA5412;-	PA14_RS29095;PA14_71430	false	false	52	52	1	1	1	0	0	0	5.26735	NaN	0	0	0	0	1	1	1	1	1	1	1	1	1	1	1	1	1	1	1	1	1	1	1	1	1	1	1	1	1	1	1	1
438	956	hypothetical protein	-	-	NQ73_RS28880;-	false	false	1	1	0.5	0.526562	0.937531	-0.19102	0.30103	0.0280144	5.08	5.27102	0.30103	0.0280144	0.4854	0.4917	0	0	0	0	0	0	0	0	0	0	0	0	0	0	0	0	0	0	0	0	0	0	0	0	0	1	0	0
439	959	copper ABC transporter ATPase	-	-	PACI27_RS15220;PACI27_2932	false	false	3	3	0.468718	0.546863	0.80569	-0.353048	0.329089	0.0938323	4.93467	5.28771	0.329089	0.0938323	0.4581	0.4273	0	0	0	0	0	0	0	0	0	0	0	1	0	0	0	0	0	0	0	0	0	0	0	0	0	0	0	0
440	960	hypothetical protein	-	-	Q009_RS38410;Q009_06293	false	true	1	1	0.394918	0.630492	0.755716	-0.757922	0.403493	0.121641	4.524	5.28192	0.403493	0.121641	0.4021	0.4067	0	0	0	0	0	0	0	0	0	0	0	0	0	0	0	0	0	0	0	0	0	1	0	0	0	0	0	0
441	961	molybdopterin oxidoreductase	PA14_RS26605;PA14_65060	PA4927;-	PA14_RS26605;PA14_65060	false	false	52	52	1	1	1	0	0	0	5.26735	NaN	0	0	0	0	1	1	1	1	1	1	1	1	1	1	1	1	1	1	1	1	1	1	1	1	1	1	1	1	1	1	1	1
442	963	nitrate reductase catalytic subunit	PA14_RS20000;PA14_49250	PA1174;-	PA14_RS20000;PA14_49250	false	false	52	52	1	1	1	0	0	0	5.26735	NaN	0	0	0	0	1	1	1	1	1	1	1	1	1	1	1	1	1	1	1	1	1	1	1	1	1	1	1	1	1	1	1	1
443	964	transporter	-	-	NT49_RS27835;-	false	true	1	1	0.27436	0.747394	0.463851	-1.78059	0.561679	0.333622	3.521	5.30159	0.561679	0.333622	0.3131	0.3252	0	0	0	0	0	0	0	0	0	0	0	0	0	0	0	0	1	0	0	0	0	0	0	0	0	0	0	0
444	965	glycerol-3-phosphate 1-O-acyltransferase	PA14_RS06760;PA14_16860	PA3673;-	PA14_RS06760;PA14_16860	false	false	52	52	1	1	1	0	0	0	5.26735	NaN	0	0	0	0	1	1	1	1	1	1	1	1	1	1	1	1	1	1	1	1	1	1	1	1	1	1	1	1	1	1	1	1
445	968	tape measure domain-containing protein	-	-	PABE173_RS35740;-	false	true	2	1	0.193189	0.824547	0.384173	-2.11298	0.714017	0.415473	3.195	5.30798	0.714017	0.415473	0.2293	0.2301	0	0	0	0	0	0	0	0	0	0	0	0	2	0	0	0	0	0	0	0	0	0	0	0	0	0	0	0
446	969	aldehyde dehydrogenase	PA14_RS15105;PA14_37090	PA2124;-	PA14_RS15105;PA14_37090	false	false	56	52	1	1	1	0	0	0	5.26735	NaN	0	0	0	0	1	1	1	2	1	1	1	1	1	1	1	1	1	1	1	1	1	1	1	1	1	2	1	1	1	1	1	1
447	970	ABC transporter permease	PA14_RS10970;PA14_27140	PA2858;-	PA14_RS10970;PA14_27140	false	false	52	52	1	1	1	0	0	0	5.26735	NaN	0	0	0	0	1	1	1	1	1	1	1	1	1	1	1	1	1	1	1	1	1	1	1	1	1	1	1	1	1	1	1	1
448	975	hypothetical protein	PA14_RS11735;PA14_28820	-	PA14_RS11735;PA14_28820	false	false	4	4	0.219859	0.79017	0.393601	-1.06773	0.657856	0.404943	4.28175	5.34948	0.657856	0.404943	0.2158	0.2015	0	0	0	1	0	0	0	0	0	0	0	1	0	0	0	0	0	0	0	0	0	0	0	0	0	0	0	0
449	976	alkaline phosphatase	-	-	NT47_RS17410;-	false	false	1	1	0.703	0.320458	0.734059	0.827569	-0.494228	-0.134269	6.079	5.25143	-0.494228	-0.134269	0.34	0.349	0	0	0	0	0	0	0	0	0	0	0	0	0	0	0	0	0	0	0	0	0	0	0	0	0	0	0	0
450	979	peptidase	PA14_RS27210;PA14_66670	PA5045;-	PA14_RS27210;PA14_66670	false	false	52	52	1	1	1	0	0	0	5.26735	NaN	0	0	0	0	1	1	1	1	1	1	1	1	1	1	1	1	1	1	1	1	1	1	1	1	1	1	1	1	1	1	1	1
451	980	tail length tape measure protein	-	-	ACP77_RS05645;-	false	true	8	8	0.520228	0.489883	0.831594	0.19725	-0.309908	-0.0800887	5.43425	5.237	-0.309908	-0.0800887	0.48	0.4054	0	0	1	0	0	0	0	0	0	1	0	0	1	0	0	0	0	0	0	1	0	0	0	0	0	0	0	0
452	983	conjugal transfer protein TrbE	PA14_RS12625;PA14_30910	-	PA14_RS12625;PA14_30910	false	false	25	20	0.856046	0.148262	0.417152	0.556406	-0.828969	-0.379706	5.60975	5.05334	-0.828969	-0.379706	0.1504	0.2153	0	0	0	1	0	0	0	0	0	0	0	1	1	0	0	0	0	1	1	0	1	4	0	3	0	1	0	1
453	985	cell division protein FtsK	PA14_RS12345;PA14_30290	PA2615;-	PA14_RS12345;PA14_30290	false	false	51	51	0.369508	0.655343	0.829501	-0.524745	0.432376	0.0811833	5.25725	5.782	0.432376	0.0811833	0.3748	0.3796	1	1	1	1	1	1	1	1	1	1	1	1	1	1	1	1	1	1	1	1	1	1	1	1	1	1	1	1
454	991	copper-transporting ATPase	-	-	ACP77_RS11695;-	false	false	12	12	0.581734	0.426767	0.877439	0.122508	-0.36981	-0.0567832	5.36158	5.23907	-0.36981	-0.0567832	0.4243	0.4369	0	0	0	0	0	0	0	1	0	0	0	0	1	0	0	0	0	1	1	0	1	0	0	1	0	0	0	1
455	992	RNA helicase	-	-	PACIG1_RS06670;PACIG1_1275	false	false	4	4	0.809401	0.200076	0.22971	1.49788	-0.698806	-0.63882	6.65	5.15212	-0.698806	-0.63882	0.1937	0.1185	0	0	0	0	0	0	0	0	0	0	0	0	1	0	0	0	0	0	0	0	1	0	0	0	0	0	0	0
456	998	ATPase associated with various cellular activities (AAA)	-	-	ACP77_RS14400;-	false	false	2	2	0.912474	0.0953412	0.126485	2.62876	-1.02072	-0.897959	7.795	5.16624	-1.02072	-0.897959	0.098	0.0666	0	0	0	0	0	0	0	0	0	0	0	0	0	0	0	0	0	0	0	0	0	0	0	0	0	0	0	0
457	1000	conjugal transfer protein	-	-	P998_RS35195;P998_05823	false	true	3	3	0.915222	0.0910383	0.255696	1.62118	-1.04078	-0.592276	6.795	5.17382	-1.04078	-0.592276	0.0917	0.1371	0	0	0	0	0	0	0	0	0	0	0	0	0	0	0	0	0	0	0	0	0	0	0	0	0	0	0	0
458	1002	oxidoreductase	PA14_RS03775;PA14_09290	PA4223;-	PA14_RS03775;PA14_09290	false	false	99	52	1	1	1	0	0	0	5.26735	NaN	0	0	0	0	2	2	2	2	2	2	2	2	2	2	2	2	2	2	2	2	2	2	1	1	2	2	2	2	2	2	2	1
459	1003	carbonate dehydratase	PA14_RS18060;PA14_44440	PA1549;-	PA14_RS18060;PA14_44440	false	false	51	51	0.841216	0.175453	0.370223	2.17518	-0.75584	-0.431536	5.30918	3.134	-0.75584	-0.431536	0.21	0.2256	1	1	1	1	1	1	1	1	1	1	1	0	1	1	1	1	1	1	1	1	1	1	1	1	1	1	1	1
460	1005	copper-translocating P-type ATPase	-	-	ACP77_RS11840;-	false	false	7	7	0.44668	0.5639	0.911881	-0.108527	0.350003	0.0400617	5.17343	5.28196	0.350003	0.0400617	0.4333	0.46	0	0	0	0	0	0	0	0	0	0	0	0	1	0	0	0	0	1	1	0	1	0	0	0	0	0	0	1
461	1009	ferrioxamine receptor FoxA	PA14_RS13350;PA14_32740	PA2466;-	PA14_RS13350;PA14_32740	false	false	51	51	0.07134	0.937302	0.0796457	-4.20655	1.14667	1.09884	5.18645	9.393	1.14667	1.09884	0.0581	0.0631	1	1	1	1	1	1	1	1	1	1	1	1	1	1	1	1	1	1	1	1	1	1	1	1	1	1	1	1
462	1010	aromatic amino acid transporter AroP	PA14_RS10240;PA14_25270	PA0866;-	PA14_RS10240;PA14_25270	false	false	99	51	0.5	0.526562	0.997882	0.00647059	0.30103	-0.000920888	5.26747	5.261	0.30103	-0.000920888	0.4747	0.5209	2	2	2	2	2	2	2	2	2	2	2	2	1	2	2	2	2	2	2	2	1	2	2	2	2	2	0	2
463	1014	protein kinase	PA14_RS04750;PA14_11730	PA4027;-	PA14_RS04750;PA14_11730	false	false	99	51	0.605082	0.420782	0.789046	0.651882	-0.375943	-0.102898	5.27988	4.628	-0.375943	-0.102898	0.4142	0.431	2	2	2	2	2	2	2	2	2	2	2	2	1	2	2	2	2	2	2	2	2	2	0	2	2	2	2	1
464	1016	GGDEF domain-containing protein	-	PA0861;-	PA0861;-	false	false	46	46	0.338956	0.671463	0.575644	-0.585551	0.469856	0.239846	5.19978	5.78533	0.469856	0.239846	0.335	0.2838	1	1	1	0	1	1	1	1	1	1	1	0	1	1	1	1	1	1	1	1	1	1	1	1	1	1	1	1
465	1018	copper-transporting ATPase	-	-	PABE177_RS15170;PABE177_2800	false	false	1	1	0.344657	0.679542	0.628769	-1.17698	0.462613	0.201509	4.113	5.28998	0.462613	0.201509	0.3642	0.366	0	0	0	0	0	0	0	0	0	0	0	0	0	0	0	0	0	0	0	1	0	0	0	0	0	0	0	0
466	1020	nitrite reductase large subunit	PA14_RS16845;PA14_41530	PA1781;-	PA14_RS16845;PA14_41530	false	false	51	51	0.115194	0.897242	0.170482	-3.30929	0.93857	0.768321	5.20371	8.513	0.93857	0.768321	0.1357	0.1393	1	1	1	1	1	1	1	1	1	1	1	1	1	1	1	1	1	1	1	1	1	1	1	1	1	1	1	1
467	1021	hypothetical protein	-	-	NS12_RS09540;-	false	false	1	1	0.211979	0.806811	0.393487	-2.0722	0.673707	0.40507	3.235	5.3072	0.673707	0.40507	0.2502	0.2516	0	0	0	0	0	0	0	0	0	0	0	0	0	1	0	0	0	0	0	0	0	0	0	0	0	0	0	0
468	1023	ATP-dependent protease	PA14_RS24735;PA14_60550	PA4576;-	PA14_RS24735;PA14_60550	false	false	52	52	1	1	1	0	0	0	5.26735	NaN	0	0	0	0	1	1	1	1	1	1	1	1	1	1	1	1	1	1	1	1	1	1	1	1	1	1	1	1	1	1	1	1
469	1024	ligand-gated channel	PA14_RS16135;PA14_39820	PA1910;-	PA14_RS16135;PA14_39820	false	false	51	51	0.897242	0.115194	0.278294	2.62686	-0.93857	-0.555496	5.31786	2.691	-0.93857	-0.555496	0.131	0.1435	1	1	1	1	1	1	1	0	1	1	1	1	1	1	1	1	1	1	1	1	1	1	1	1	1	1	1	1
470	1026	terpene utilization protein AtuA	PA14_RS10830;PA14_26750	PA2886;-	PA14_RS10830;PA14_26750	false	false	52	52	1	1	1	0	0	0	5.26735	NaN	0	0	0	0	1	1	1	1	1	1	1	1	1	1	1	1	1	1	1	1	1	1	1	1	1	1	1	1	1	1	1	1
471	1027	acyl-CoA dehydrogenase	PA14_RS11245;PA14_27730	PA2815;-	PA14_RS11245;PA14_27730	false	false	50	50	0.292115	0.724012	0.77388	-0.49988	0.534447	0.111326	5.24812	5.748	0.534447	0.111326	0.2853	0.3808	1	1	1	1	1	1	1	1	1	1	1	1	1	1	1	1	1	1	1	1	1	1	1	1	0	1	1	1
472	1028	protein FpvAIII	-	-	NT05_RS24105;-	false	false	8	8	0.961023	0.0411649	0.215461	1.14034	-1.38547	-0.666631	6.23225	5.09191	-1.38547	-0.666631	0.0409	0.1092	0	0	0	0	0	0	0	0	0	0	0	0	0	0	0	0	0	0	0	0	0	0	0	1	0	1	0	0
473	1029	ligand-gated channel	PA14_RS13720;PA14_33680	PA2398;-	PA14_RS13720;PA14_33680	false	false	21	21	0.330596	0.676135	0.728023	-0.237097	0.480702	0.137855	5.126	5.3631	0.480702	0.137855	0.3289	0.3667	1	0	1	1	1	0	0	0	0	1	0	1	1	1	0	0	0	0	1	0	1	0	0	0	0	0	0	1
474	1030	hypothetical protein	-	-	Q012_RS25955;Q012_03807	false	false	2	2	0.415223	0.603228	0.725925	-0.6098	0.381718	0.139108	4.681	5.2908	0.381718	0.139108	0.3993	0.4047	0	0	0	0	0	0	0	0	0	0	0	0	0	0	0	0	0	1	0	0	0	0	0	0	0	0	0	0
475	1034	ribonucleoside-diphosphate reductase, adenosylcobalamin-dependent	PA14_RS29530;PA14_72540	PA5497;-	PA5497;-	false	false	52	52	1	1	1	0	0	0	5.26735	NaN	0	0	0	0	1	1	1	1	1	1	1	1	1	1	1	1	1	1	1	1	1	1	1	1	1	1	1	1	1	1	1	1
476	1037	TonB-dependent receptor	-	-	NR77_RS31085;-	false	false	1	1	0.72564	0.297	0.726497	0.852039	-0.527244	-0.138766	6.103	5.25096	-0.527244	-0.138766	0.3225	0.3241	0	0	0	0	0	0	0	0	0	0	0	0	0	0	0	0	0	0	0	0	0	0	0	0	0	0	0	0
477	1038	ligand-gated channel	-	-	NR77_RS31100;-	false	false	1	1	0.72564	0.297	0.726497	0.852039	-0.527244	-0.138766	6.103	5.25096	-0.527244	-0.138766	0.3225	0.3241	0	0	0	0	0	0	0	0	0	0	0	0	0	0	0	0	0	0	0	0	0	0	0	0	0	0	0	0
478	1039	penicillin acylase	PA14_RS16225;PA14_40040	PA1893;-	PA14_RS16225;PA14_40040	false	false	52	52	1	1	1	0	0	0	5.26735	NaN	0	0	0	0	1	1	1	1	1	1	1	1	1	1	1	1	1	1	1	1	1	1	1	1	1	1	1	1	1	1	1	1
479	1042	glycogen phosphorylase	PA14_RS14995;PA14_36840	PA2144;-	PA14_RS14995;PA14_36840	false	false	51	51	0.747394	0.27436	0.463851	1.78059	-0.561679	-0.333622	5.30159	3.521	-0.561679	-0.333622	0.3131	0.3295	1	1	1	1	1	1	1	1	1	1	1	1	1	1	1	1	0	1	1	1	1	1	1	1	1	1	1	1
480	1043	lost adherence sensor LadS	-	PA3974;-	PA3974;-	false	false	49	49	0.872472	0.135904	0.293107	1.50094	-0.866767	-0.532974	5.35394	3.853	-0.866767	-0.532974	0.1354	0.1532	1	1	1	0	1	1	1	1	1	1	1	1	0	1	1	1	1	1	1	1	1	1	1	1	1	1	1	1
481	1045	hypothetical protein	-	-	Y880_RS01600;-	false	false	3	3	0.562372	0.453137	0.770588	0.418463	-0.343771	-0.113178	5.66167	5.2432	-0.343771	-0.113178	0.4453	0.3802	0	0	0	0	0	0	0	0	0	0	0	0	1	0	0	0	0	0	0	0	1	0	0	0	0	0	0	0
482	1046	glucose dehydrogenase	PA14_RS14235;PA14_34970	PA2290;-	PA14_RS14235;PA14_34970	false	false	49	49	0.376771	0.638038	0.701771	-0.549347	0.423923	0.153805	5.23565	5.785	0.423923	0.153805	0.3582	0.3329	1	1	1	1	1	1	1	1	1	1	1	1	1	1	1	1	0	1	1	1	0	1	1	1	1	1	1	1
483	1048	D-xylulose 5-phosphate/D-fructose 6-phosphate phosphoketolase	-	-	ACP77_RS11760;-	false	false	7	7	0.44668	0.5639	0.911881	-0.108527	0.350003	0.0400617	5.17343	5.28196	0.350003	0.0400617	0.4333	0.46	0	0	0	0	0	0	0	0	0	0	0	0	1	0	0	0	0	1	1	0	1	0	0	0	0	0	0	1
484	1050	type IV secretion protein Rhs	PA14_RS27430;PA14_67230	PA5090;-	PA14_RS27430;PA14_67230	false	false	104	52	1	1	1	0	0	0	5.26735	NaN	0	0	0	0	2	2	2	2	2	2	2	2	2	2	2	2	2	2	2	2	2	2	2	2	2	2	2	2	2	2	2	2
485	1051	mechanosensitive ion channel protein MscS	PA14_RS18760;PA14_46240	PA1408;-	PA14_RS18760;PA14_46240	false	false	52	52	1	1	1	0	0	0	5.26735	NaN	0	0	0	0	1	1	1	1	1	1	1	1	1	1	1	1	1	1	1	1	1	1	1	1	1	1	1	1	1	1	1	1
486	1052	hypothetical protein	-	-	Q000_RS27215;Q000_04189	false	false	4	4	0.0205123	0.981128	0.0406212	-2.51831	1.68799	1.39125	2.94275	5.46106	1.68799	1.39125	0.0171	0.0114	0	0	0	0	0	0	0	0	1	1	1	0	0	0	0	1	0	0	0	0	0	0	0	0	0	0	0	0
487	1053	TonB-dependent receptor	-	-	Q009_RS20235;Q009_02524	false	false	23	23	0.206138	0.799075	0.582043	-0.37039	0.685843	0.235045	5.06078	5.43117	0.685843	0.235045	0.2027	0.2857	0	1	0	0	0	1	1	1	1	0	1	0	0	0	1	1	1	1	0	1	0	1	1	0	1	0	1	0
488	1055	type IV secretion protein Rhs	PA14_RS07615;PA14_18985	PA3294;-	PA14_RS07615;PA14_18985	false	false	100	51	0.0808686	0.92866	0.103292	-3.918	1.09222	0.985933	5.192	9.11	1.09222	0.985933	0.0776	0.0809	2	2	1	4	2	2	2	2	1	2	2	1	2	2	2	2	2	4	2	2	1	3	2	2	2	2	2	1
489	1058	DNA gyrase subunit B	PA14_RS00020;PA14_00050	PA0004;-	PA14_RS00020;PA14_00050	false	false	53	52	1	1	1	0	0	0	5.26735	NaN	0	0	0	0	1	1	1	1	1	1	1	1	1	1	1	1	1	1	1	1	1	1	1	1	1	1	1	1	1	1	1	1
490	1060	ATP-dependent endonuclease	PA14_RS24515;PA14_60070	-	PA14_RS24515;PA14_60070	false	false	4	4	0.219859	0.79017	0.393601	-1.06773	0.657856	0.404943	4.28175	5.34948	0.657856	0.404943	0.2158	0.2015	0	0	0	1	0	0	0	0	0	0	0	1	0	0	0	0	0	0	0	0	0	0	0	0	0	0	0	0
491	1063	TonB-dependent receptor	PA14_RS02475;PA14_06160	PA0470;-	PA14_RS02475;PA14_06160	false	false	51	51	0.824547	0.193189	0.384173	2.11298	-0.714017	-0.415473	5.30798	3.195	-0.714017	-0.415473	0.2293	0.2438	1	1	1	1	1	1	1	1	1	1	1	1	0	1	1	1	1	1	1	1	1	1	1	1	1	1	1	1
492	1067	helicase	-	-	ACP77_RS20375;-	false	false	9	8	0.78783	0.219597	0.48825	0.641466	-0.658373	-0.311358	5.81013	5.16866	-0.658373	-0.311358	0.2138	0.2402	1	0	0	0	0	0	0	0	0	0	0	0	1	0	0	0	0	0	0	0	1	0	0	0	0	0	0	0
493	1071	RND transporter	-	-	Q006_RS14295;Q006_01620	false	false	39	39	0.730013	0.277019	0.56395	0.445282	-0.55749	-0.248759	5.37867	4.93338	-0.55749	-0.248759	0.2654	0.2767	1	1	1	0	0	1	1	1	1	1	0	1	0	0	1	1	0	1	1	1	0	1	0	1	1	1	1	1
494	1075	type II secretion system protein GspD	PA14_RS22595;PA14_55450	PA0685;-	PA14_RS22595;PA14_55450	false	false	53	52	1	1	1	0	0	0	5.26735	NaN	0	0	0	0	1	1	1	1	1	1	1	1	1	1	1	1	1	1	1	1	1	1	1	1	1	1	1	1	1	1	1	1
495	1076	hypothetical protein	-	-	NR40_RS20725;-	false	false	3	3	0.970207	0.0325482	0.132567	2.13482	-1.48747	-0.877564	7.279	5.14418	-1.48747	-0.877564	0.0268	0.0765	0	0	0	0	0	0	0	0	0	0	0	0	0	0	0	0	0	0	0	0	0	0	0	0	0	0	0	0
496	1078	signal recognition particle-docking protein FtsY	PA14_RS01985;PA14_04900	PA0373;-	PA14_RS01985;PA14_04900	false	false	53	47	0.493809	0.518568	0.833377	-0.238817	0.306441	0.0791587	5.24438	5.4832	0.306441	0.0791587	0.4822	0.3995	1	1	1	1	1	1	1	0	0	1	1	2	1	1	1	1	1	1	1	1	1	1	2	1	1	1	0	1
497	1079	ligand-gated channel	PA14_RS04030;PA14_09970	PA4168;-	PA14_RS04030;PA14_09970	false	false	49	49	0.445372	0.570093	0.69209	-0.568095	0.351277	0.159838	5.23457	5.80267	0.351277	0.159838	0.444	0.3435	1	1	1	1	1	1	1	1	0	1	1	1	1	1	1	1	1	1	1	1	1	1	0	1	1	1	1	1
498	1081	sensor histidine kinase	PA14_RS03130;PA14_07820	PA0600;-	PA14_RS03130;PA14_07820	false	false	51	51	0.091328	0.919131	0.136629	-3.58765	1.0394	0.864456	5.19835	8.786	1.0394	0.864456	0.0987	0.1019	1	1	1	1	1	1	1	1	1	1	1	1	1	1	1	1	1	1	1	1	1	1	1	1	1	1	1	1
499	1082	D-xylulose 5-phosphate/D-fructose 6-phosphate phosphoketolase	PA14_RS07060;PA14_17580	PA3613;-	PA14_RS07060;PA14_17580	false	false	52	52	1	1	1	0	0	0	5.26735	NaN	0	0	0	0	1	1	1	1	1	1	1	1	1	1	1	1	1	1	1	1	1	1	1	1	1	1	1	1	1	1	1	1
500	1084	heavy metal translocating P-type ATPase	-	-	NT47_RS17240;-	false	false	1	1	0.703	0.320458	0.734059	0.827569	-0.494228	-0.134269	6.079	5.25143	-0.494228	-0.134269	0.34	0.349	0	0	0	0	0	0	0	0	0	0	0	0	0	0	0	0	0	0	0	0	0	0	0	0	0	0	0	0
501	1087	xanthine dehydrogenase molybdopterin binding subunit	PA14_RS18190;PA14_44740	PA1523;-	PA14_RS18190;PA14_44740	false	false	52	52	1	1	1	0	0	0	5.26735	NaN	0	0	0	0	1	1	1	1	1	1	1	1	1	1	1	1	1	1	1	1	1	1	1	1	1	1	1	1	1	1	1	1
502	1090	ATP-dependent protease	PA14_RS22065;PA14_54210	PA0779;-	PA14_RS22065;PA14_54210	false	false	52	52	1	1	1	0	0	0	5.26735	NaN	0	0	0	0	1	1	1	1	1	1	1	1	1	1	1	1	1	1	1	1	1	1	1	1	1	1	1	1	1	1	1	1
503	1093	copper-transporting ATPase	PA14_RS05295;PA14_13170	PA3920;-	PA14_RS05295;PA14_13170	false	false	50	50	0.783814	0.230393	0.423283	1.38928	-0.637531	-0.373369	5.32078	3.9315	-0.637531	-0.373369	0.2264	0.2182	1	1	1	1	1	1	1	1	1	1	1	1	1	0	1	1	1	1	1	1	1	1	0	1	1	1	1	1
504	1094	two-component sensor	-	-	PACI27_RS19105;PACI27_3673	false	false	2	2	0.342935	0.674383	0.600882	-0.90932	0.464788	0.221211	4.393	5.30232	0.464788	0.221211	0.3347	0.3335	0	0	0	0	0	0	0	0	0	0	0	0	1	0	0	0	0	0	0	0	0	0	0	0	0	0	0	0
505	1095	Lon protease	PA14_RS16705;PA14_41220	PA1803;-	PA14_RS16705;PA14_41220	false	false	52	52	1	1	1	0	0	0	5.26735	NaN	0	0	0	0	1	1	1	1	1	1	1	1	1	1	1	1	1	1	1	1	1	1	1	1	1	1	1	1	1	1	1	1
506	1098	outer membrane protein assembly factor BamA	PA14_RS06885;PA14_17150	PA3648;-	PA14_RS06885;PA14_17150	false	false	51	51	0.115194	0.897242	0.170482	-3.30929	0.93857	0.768321	5.20371	8.513	0.93857	0.768321	0.1357	0.1393	1	1	1	1	1	1	1	1	1	1	1	1	1	1	1	1	1	1	1	1	1	1	1	1	1	1	1	1
507	1100	lambda family phage tail tape measure protein	-	-	NT56_RS09050;-	false	true	1	1	0.115194	0.897242	0.278294	-2.62686	0.93857	0.555496	2.691	5.31786	0.93857	0.555496	0.131	0.1396	0	0	0	0	0	0	0	1	0	0	0	0	0	0	0	0	0	0	0	0	0	0	0	0	0	0	0	0
508	1102	TonB-dependent receptor	PA14_RS00770;PA14_01870	PA0151;-	PA14_RS00770;PA14_01870	false	false	52	52	1	1	1	0	0	0	5.26735	NaN	0	0	0	0	1	1	1	1	1	1	1	1	1	1	1	1	1	1	1	1	1	1	1	1	1	1	1	1	1	1	1	1
509	1104	restriction-modification system protein	-	PA2735;-	PA2735;-	false	false	1	1	0.806811	0.211979	0.629571	1.17424	-0.673707	-0.200955	6.419	5.24476	-0.673707	-0.200955	0.2572	0.263	0	0	0	0	0	0	0	0	0	0	0	0	0	0	0	0	0	0	0	0	0	0	0	0	0	0	0	0
510	1105	phage tail protein	-	-	ACP77_RS15495;-	false	true	3	3	0.806049	0.204918	0.194057	1.84864	-0.688419	-0.712071	7.00933	5.16069	-0.688419	-0.712071	0.2061	0.1032	0	0	0	0	1	0	0	0	0	0	0	0	0	0	0	0	0	0	0	0	0	0	0	0	0	0	0	0
511	1106	restriction endonuclease	-	-	NT81_RS26695;-	false	false	1	1	0.945106	0.0626977	0.0763877	4.25141	-1.20275	-1.11698	9.437	5.18559	-1.20275	-1.11698	0.0371	0.0372	0	0	0	0	0	0	0	0	0	0	0	0	0	0	0	0	0	0	0	0	0	0	0	0	0	0	0	0
512	1109	penicillin amidase	PA14_RS01625;PA14_03980	PA0305;-	PA14_RS01625;PA14_03980	false	false	52	52	1	1	1	0	0	0	5.26735	NaN	0	0	0	0	1	1	1	1	1	1	1	1	1	1	1	1	1	1	1	1	1	1	1	1	1	1	1	1	1	1	1	1
513	1111	phage tail tape measure protein	-	-	NS42_RS13430;-	false	true	5	5	0.976516	0.0252592	0.0684033	2.03492	-1.59758	-1.16492	7.1066	5.07168	-1.59758	-1.16492	0.0201	0.0378	0	0	0	0	0	0	0	0	0	0	0	0	0	0	0	0	0	0	0	0	0	0	0	0	0	0	0	0
514	1114	DNA ligase (NAD(+)) LigA	PA14_RS18160;PA14_44660	PA1529;-	PA14_RS18160;PA14_44660	false	false	51	51	0.320458	0.703	0.734059	-0.827569	0.494228	0.134269	5.25143	6.079	0.494228	0.134269	0.34	0.3433	1	1	1	1	1	1	1	1	1	1	1	1	1	1	1	1	1	1	1	1	1	1	1	1	1	1	1	1
515	1117	hybrid sensor histidine kinase/response regulator	PA14_RS11145;PA14_27550	PA2824;-	PA14_RS11145;PA14_27550	false	false	40	40	0.71386	0.293573	0.802133	0.199025	-0.532284	-0.0957537	5.31327	5.11425	-0.532284	-0.0957537	0.2873	0.4082	1	1	1	1	1	0	0	1	0	1	1	0	1	0	1	1	0	1	1	1	1	1	0	1	0	1	1	1
516	1120	RND transporter	PA14_RS09850;PA14_24330	PA3079;-	PA14_RS09850;PA14_24330	false	false	50	50	0.584777	0.433864	0.720542	0.62228	-0.362646	-0.142341	5.29128	4.669	-0.362646	-0.142341	0.4249	0.4098	1	1	1	1	1	1	1	1	1	1	1	1	1	0	1	1	1	1	1	1	1	1	1	1	1	1	1	1
517	1121	TonB-dependent receptor	PA14_RS00970;PA14_02410	PA0192;-	PA14_RS00970;PA14_02410	false	false	51	51	0.369508	0.655343	0.829501	-0.524745	0.432376	0.0811833	5.25725	5.782	0.432376	0.0811833	0.3748	0.3796	1	1	1	1	1	1	1	1	1	1	1	1	1	1	1	1	1	1	1	1	1	1	1	1	1	1	1	1
518	1124	phenylalanine--tRNA ligase subunit beta	PA14_RS11690;PA14_28710	PA2739;-	PA14_RS11690;PA14_28710	false	false	51	51	0.446993	0.579218	0.963079	-0.112824	0.349699	0.0163379	5.26518	5.378	0.349699	0.0163379	0.4479	0.4518	1	1	1	1	1	1	1	1	1	1	1	1	1	1	1	1	1	1	1	1	1	1	1	1	1	1	1	1
519	1125	chromosome segregation protein SMC	-	-	NT42_RS17280;-	false	false	1	1	0.0478789	0.9584	0.106776	-3.87996	1.31986	0.971528	1.462	5.34196	1.31986	0.971528	0	0.008	1	0	0	0	0	0	0	0	0	0	0	0	0	0	0	0	0	0	0	0	0	0	0	0	0	0	0	0
520	1126	phosphoenolpyruvate synthase	PA14_RS16900;PA14_41670	PA1770;-	PA14_RS16900;PA14_41670	false	false	52	52	1	1	1	0	0	0	5.26735	NaN	0	0	0	0	1	1	1	1	1	1	1	1	1	1	1	1	1	1	1	1	1	1	1	1	1	1	1	1	1	1	1	1
521	1131	type 1 pili usher protein CsuD	PA14_RS25145;PA14_61540	PA4652;-	PA14_RS25145;PA14_61540	false	false	52	52	1	1	1	0	0	0	5.26735	NaN	0	0	0	0	1	1	1	1	1	1	1	1	1	1	1	1	1	1	1	1	1	1	1	1	1	1	1	1	1	1	1	1
522	1136	TonB-dependent receptor	-	PA2335;-	PA2335;-	false	false	40	40	0.922574	0.0806249	0.142504	1.15257	-1.09353	-0.846174	5.53332	4.38075	-1.09353	-0.846174	0.0749	0.0656	0	1	1	0	1	1	1	1	1	1	1	0	1	1	1	1	0	0	1	0	0	0	1	0	1	1	1	1
523	1137	hypothetical protein	-	-	NT38_RS00540;-	false	false	1	1	0.9584	0.0478789	0.024915	5.33016	-1.31986	-1.60354	10.495	5.16484	-1.31986	-1.60354	0	0.0007	0	0	0	0	0	0	0	0	0	0	0	0	0	0	0	0	0	0	0	0	0	0	0	0	0	0	0	0
524	1138	DNA polymerase II	PA14_RS16265;PA14_40120	PA1886;-	PA14_RS16265;PA14_40120	false	false	52	52	1	1	1	0	0	0	5.26735	NaN	0	0	0	0	1	1	1	1	1	1	1	1	1	1	1	1	1	1	1	1	1	1	1	1	1	1	1	1	1	1	1	1
525	1143	hypothetical protein	-	-	ACP77_RS11140;-	false	true	1	1	0.952121	0.0548941	0.041044	4.87643	-1.26047	-1.38675	10.05	5.17357	-1.26047	-1.38675	0.0208	0.0229	0	0	0	0	0	0	0	0	0	0	0	0	0	0	0	0	0	0	0	0	0	0	0	0	0	0	0	0
526	1144	RND transporter	-	-	L683_RS62320;L683_25060	false	false	1	1	0.0626977	0.945106	0.203929	-3.07141	1.20275	0.690521	2.255	5.32641	1.20275	0.690521	0.0322	0.0355	0	0	1	0	0	0	0	0	0	0	0	0	0	0	0	0	0	0	0	0	0	0	0	0	0	0	0	0
527	1149	Fe(III) dicitrate transporter FecA	PA14_RS05405;PA14_13430	PA3901;-	PA14_RS05405;PA14_13430	false	false	51	51	0.824547	0.193189	0.384173	2.11298	-0.714017	-0.415473	5.30798	3.195	-0.714017	-0.415473	0.2293	0.2438	1	1	1	1	1	1	1	1	1	1	1	1	0	1	1	1	1	1	1	1	1	1	1	1	1	1	1	1
528	1151	chemotaxis protein CheA	PA14_RS06605;PA14_16470	PA3704;-	PA14_RS06605;PA14_16470	false	false	52	52	1	1	1	0	0	0	5.26735	NaN	0	0	0	0	1	1	1	1	1	1	1	1	1	1	1	1	1	1	1	1	1	1	1	1	1	1	1	1	1	1	1	1
529	1153	ATP-dependent endonuclease	-	-	NT41_RS28535;-	false	false	1	1	0.747394	0.27436	0.722097	0.866314	-0.561679	-0.141404	6.117	5.25069	-0.561679	-0.141404	0.3166	0.3183	0	0	0	0	0	0	0	0	0	0	0	0	0	0	0	0	0	0	0	0	0	0	0	0	0	0	0	0
530	1156	phage tail fiber protein	-	-	NT49_RS00400;-	false	true	1	1	0.27436	0.747394	0.463851	-1.78059	0.561679	0.333622	3.521	5.30159	0.561679	0.333622	0.3131	0.3252	0	0	0	0	0	0	0	0	0	0	0	0	0	0	0	0	1	0	0	0	0	0	0	0	0	0	0	0
531	1157	signaling protein	PA14_RS08530;PA14_21190	PA3311;-	PA14_RS08530;PA14_21190	false	false	52	52	1	1	1	0	0	0	5.26735	NaN	0	0	0	0	1	1	1	1	1	1	1	1	1	1	1	1	1	1	1	1	1	1	1	1	1	1	1	1	1	1	1	1
532	1158	DUF3893 domain-containing protein	-	-	PACIG1_RS09400;-	false	false	7	7	0.839399	0.167227	0.357378	0.898787	-0.776694	-0.446873	6.04514	5.14636	-0.776694	-0.446873	0.1597	0.1759	0	0	0	0	0	0	0	0	0	0	0	0	1	0	0	0	0	0	0	0	1	0	0	0	0	1	0	0
533	1160	extracellular DNA degradation protein, EddB	PA14_RS05365;PA14_13340	PA3909;-	PA3909;-	false	false	52	52	1	1	1	0	0	0	5.26735	NaN	0	0	0	0	1	1	1	1	1	1	1	1	1	1	1	1	1	1	1	1	1	1	1	1	1	1	1	1	1	1	1	1
534	1164	oxidoreductase	PA14_RS27905;PA14_68440	PA5181;-	PA14_RS27905;PA14_68440	false	false	52	52	1	1	1	0	0	0	5.26735	NaN	0	0	0	0	1	1	1	1	1	1	1	1	1	1	1	1	1	1	1	1	1	1	1	1	1	1	1	1	1	1	1	1
535	1167	electron transport complex subunit RsxC	PA14_RS07590;PA14_18920	PA3491;-	PA14_RS07590;PA14_18920	false	false	50	50	0.0215714	0.98077	0.0188931	-3.97504	1.66612	1.7237	5.11446	9.0895	1.66612	1.7237	0.0119	0.0163	1	1	1	1	1	1	1	1	1	1	1	1	1	1	1	1	1	1	1	1	1	1	1	1	1	1	1	1
536	1168	hypothetical protein	-	-	NQ73_RS27860;-	false	false	1	1	0.5	0.526562	0.937531	-0.19102	0.30103	0.0280144	5.08	5.27102	0.30103	0.0280144	0.4854	0.4917	0	0	0	0	0	0	0	0	0	0	0	0	0	0	0	0	0	0	0	0	0	0	0	0	0	1	0	0
537	1172	coenzyme PQQ biosynthesis protein PqqF	PA14_RS15835;PA14_39010	PA1973;-	PA14_RS15835;PA14_39010	false	false	49	49	0.0226648	0.979366	0.035571	-2.95125	1.64465	1.4489	5.09708	8.04833	1.64465	1.4489	0.0177	0.0231	1	1	1	1	1	1	1	1	1	1	1	1	1	1	1	1	1	1	1	1	1	1	1	1	1	1	1	1
538	1176	RNA-binding transcriptional accessory protein	PA14_RS28010;PA14_68710	PA5201;-	PA14_RS28010;PA14_68710	false	false	51	51	0.945106	0.0626977	0.203929	3.07141	-1.20275	-0.690521	5.32641	2.255	-1.20275	-0.690521	0.0322	0.0469	1	1	0	1	1	1	1	1	1	1	1	1	1	1	1	1	1	1	1	1	1	1	1	1	1	1	1	1
539	1177	hypothetical protein	-	-	Q009_RS38320;Q009_06273	false	true	2	2	0.275988	0.739689	0.51229	-1.13812	0.55911	0.290484	4.173	5.31112	0.55911	0.290484	0.2729	0.2782	0	0	0	0	0	0	0	0	0	0	0	0	0	0	0	0	0	1	0	0	0	1	0	0	0	0	0	0
540	1179	ATP-dependent endonuclease	-	-	NT88_RS13035;-	false	false	2	2	0.769607	0.245107	0.444427	1.3272	-0.610645	-0.3522	6.5435	5.2163	-0.610645	-0.3522	0.2491	0.2271	0	0	0	0	0	0	0	0	0	0	0	0	0	0	0	0	0	0	0	0	0	0	0	1	0	0	0	0
541	1180	membrane protein	PA14_RS22915;PA14_56160	PA4322;-	PA14_RS22915;PA14_56160	false	false	103	52	1	1	1	0	0	0	5.26735	NaN	0	0	0	0	2	2	2	2	2	2	2	2	2	2	2	2	2	2	2	2	2	2	2	2	2	2	2	2	2	2	2	2
542	1182	molybdopterin oxidoreductase	PA14_RS11840;PA14_29050	PA2714;-	PA14_RS11840;PA14_29050	false	false	50	50	0.230393	0.783814	0.398116	-1.46552	0.637531	0.399991	5.21098	6.6765	0.637531	0.399991	0.2328	0.2027	1	1	1	1	1	1	1	1	1	1	1	1	1	1	1	1	1	1	1	1	1	1	0	1	1	1	1	1
543	1183	TonB-dependent receptor	PA14_RS25475;PA14_62350	PA4710;-	PA14_RS25475;PA14_62350	false	false	51	51	0.703	0.320458	0.566684	1.39416	-0.494228	-0.246659	5.29416	3.9	-0.494228	-0.246659	0.3477	0.363	1	1	1	1	1	1	1	1	1	1	1	1	1	1	1	1	1	1	0	1	1	1	1	1	1	1	1	1
544	1184	hypothetical protein	-	-	Q000_RS19880;Q000_02679	false	false	2	2	0.603228	0.415223	0.744503	0.56696	-0.381718	-0.128134	5.8125	5.24554	-0.381718	-0.128134	0.3994	0.3705	0	0	0	0	0	0	0	0	0	0	1	0	0	0	0	0	0	0	0	0	0	0	0	0	0	0	0	0
545	1188	type II secretion system protein GspD	PA14_RS16355;PA14_40320	PA1868;-	PA14_RS16355;PA14_40320	false	false	52	52	1	1	1	0	0	0	5.26735	NaN	0	0	0	0	1	1	1	1	1	1	1	1	1	1	1	1	1	1	1	1	1	1	1	1	1	1	1	1	1	1	1	1
546	1189	DNA recombination protein RecF	-	-	NR50_RS26535;-	false	false	1	1	0.655343	0.369508	0.829501	0.524745	-0.432376	-0.0811833	5.782	5.25725	-0.432376	-0.0811833	0.3748	0.3808	0	0	0	0	0	0	0	0	0	0	0	0	0	0	0	0	0	0	0	0	0	0	0	0	0	0	0	0
547	1194	tape measure domain-containing protein	PA14_RS08965;PA14_22120	-	PA14_RS08965;PA14_22120	false	false	7	7	0.324274	0.685307	0.626781	-0.476324	0.489088	0.202884	4.85514	5.33147	0.489088	0.202884	0.3187	0.319	0	0	0	1	0	0	0	0	0	0	0	1	0	0	0	0	0	1	0	0	0	1	0	0	0	0	0	0
548	1195	sulfatase	PA14_RS20285;PA14_49940	PA1115;-	PA14_RS20285;PA14_49940	false	false	52	52	1	1	1	0	0	0	5.26735	NaN	0	0	0	0	1	1	1	1	1	1	1	1	1	1	1	1	1	1	1	1	1	1	1	1	1	1	1	1	1	1	1	1
549	1196	penicillin-binding protein 1B	PA14_RS25425;PA14_62200	PA4700;-	PA14_RS25425;PA14_62200	false	false	50	50	0.308667	0.707885	0.595962	-0.9216	0.51051	0.224782	5.2319	6.1535	0.51051	0.224782	0.299	0.2837	1	1	1	1	1	1	1	1	1	1	1	1	1	1	1	1	0	1	1	1	1	1	1	1	1	1	1	1
550	1197	hypothetical protein	-	-	Q002_RS14255;Q002_01537	false	false	2	2	0.112489	0.896342	0.252053	-1.98052	0.948888	0.598508	3.363	5.34352	0.948888	0.598508	0.119	0.1304	0	1	0	0	0	0	0	0	0	0	0	0	0	0	0	0	0	0	0	0	0	0	0	0	1	0	0	0
551	1198	hypothetical protein	-	-	NS72_RS00960;-	false	false	1	1	0.897242	0.115194	0.170482	3.30929	-0.93857	-0.768321	8.513	5.20371	-0.93857	-0.768321	0.1357	0.137	0	0	0	0	0	0	0	0	0	0	0	0	0	0	0	0	0	0	0	0	0	0	0	0	0	0	0	0
552	1201	methyl-accepting chemotaxis protein	PA14_RS23915;PA14_58650	PA4520;-	PA14_RS23915;PA14_58650	false	false	49	49	0.135904	0.872472	0.170431	-1.94946	0.866767	0.768452	5.15488	7.10433	0.866767	0.768452	0.1358	0.0929	1	1	1	1	1	1	1	1	1	1	1	1	0	1	1	1	1	1	1	1	1	1	1	1	1	1	1	1
553	1204	hypothetical protein	-	-	NT88_RS29545;-	false	false	5	5	0.711826	0.298858	0.600532	0.593745	-0.524535	-0.221464	5.804	5.21026	-0.524535	-0.221464	0.2928	0.2934	0	0	0	0	0	0	0	1	0	0	0	0	0	0	0	0	1	0	0	0	0	0	0	0	0	0	0	0
554	1211	acylaldehyde oxidase	PA14_RS13825;PA14_33900	PA2378;-	PA14_RS13825;PA14_33900	false	false	51	51	0.655343	0.369508	0.715611	0.887412	-0.432376	-0.145323	5.28441	4.397	-0.432376	-0.145323	0.3769	0.3919	1	1	1	1	1	1	1	1	1	1	1	1	1	1	1	1	1	1	1	1	0	1	1	1	1	1	1	1
555	1215	GGDEF domain-containing protein	PA14_RS01525;PA14_03720	PA0285;-	PA14_RS01525;PA14_03720	false	false	54	52	1	1	1	0	0	0	5.26735	NaN	0	0	0	0	1	1	1	1	1	1	1	1	1	1	1	1	2	1	1	1	1	1	1	2	1	1	1	1	1	1	1	1
556	1216	ATPase	PA14_RS04710;PA14_11630	PA4036;-	PA14_RS04710;PA14_11630	false	false	51	51	0.605082	0.420782	0.789046	0.651882	-0.375943	-0.102898	5.27988	4.628	-0.375943	-0.102898	0.4142	0.431	1	1	1	1	1	1	1	1	1	1	1	1	1	1	1	1	1	1	1	1	1	1	0	1	1	1	1	1
557	1218	TonB-dependent receptor	-	-	NQ67_RS22090;-	false	false	1	1	0.92866	0.0808686	0.103292	3.918	-1.09222	-0.985933	9.11	5.192	-1.09222	-0.985933	0.0776	0.0812	0	0	0	0	0	0	0	0	0	0	0	0	0	0	0	0	0	0	0	0	0	0	0	0	0	0	0	0
558	1225	5-methyltetrahydropteroyltriglutamate--homocysteine methyltransferase	PA14_RS16045;PA14_39590	PA1927;-	PA14_RS16045;PA14_39590	false	false	52	52	1	1	1	0	0	0	5.26735	NaN	0	0	0	0	1	1	1	1	1	1	1	1	1	1	1	1	1	1	1	1	1	1	1	1	1	1	1	1	1	1	1	1
559	1226	chromosomal cassette SCCmec type IVc protein	-	-	Q009_RS13260;Q009_01079	false	false	3	3	0.239957	0.772072	0.458084	-1.0623	0.619867	0.339055	4.26633	5.32863	0.619867	0.339055	0.2423	0.2462	0	0	0	0	0	0	0	0	0	0	0	0	1	0	0	0	0	0	0	0	0	1	0	0	0	1	0	0
560	1228	ATP-dependent endonuclease	-	PA1939;-	PA1939;-	false	false	4	4	0.981128	0.0205123	0.116705	1.94637	-1.68799	-0.93291	7.064	5.11763	-1.68799	-0.93291	0.0165	0.0669	0	0	0	0	0	0	0	0	0	0	0	0	0	0	0	0	0	0	0	0	0	0	0	0	0	0	0	0
561	1229	pyocin killing protein	PA14_RS20105;PA14_49520	-	PA14_RS20105;PA14_49520	false	false	12	12	0.136362	0.86833	0.301595	-0.816308	0.865308	0.520576	4.63942	5.45573	0.865308	0.520576	0.1311	0.1462	0	0	0	1	0	0	1	1	0	0	0	1	0	0	0	0	1	1	0	0	0	1	1	0	0	0	0	0
562	1230	ferrous iron transporter B	PA14_RS23095;PA14_56680	PA4358;-	PA14_RS23095;PA14_56680	false	false	51	51	0.655343	0.369508	0.715611	0.887412	-0.432376	-0.145323	5.28441	4.397	-0.432376	-0.145323	0.3769	0.3919	1	1	1	1	1	1	1	1	1	1	1	1	1	1	1	1	1	1	1	1	0	1	1	1	1	1	1	1
563	1231	TonB-dependent receptor	-	-	Q009_RS34865;Q009_05560	false	false	25	25	0.711787	0.294496	0.569512	0.380436	-0.53092	-0.244497	5.46488	5.08444	-0.53092	-0.244497	0.2854	0.2812	0	0	0	0	1	0	1	1	0	1	0	0	0	1	0	0	1	1	0	0	0	1	1	1	1	1	1	1
564	1232	hypothetical protein	-	-	Q009_RS28925;Q009_04334	false	false	4	1	0.394918	0.630492	0.755716	-0.757922	0.403493	0.121641	4.524	5.28192	0.403493	0.121641	0.4021	0.4067	0	0	0	0	0	0	0	0	0	0	0	0	0	0	0	0	0	0	0	0	0	4	0	0	0	0	0	0
565	1235	beta-glucosidase	PA14_RS17135;PA14_42230	PA1726;-	PA14_RS17135;PA14_42230	false	false	51	51	0.655343	0.369508	0.715611	0.887412	-0.432376	-0.145323	5.28441	4.397	-0.432376	-0.145323	0.3769	0.3919	1	1	1	1	1	1	1	1	1	1	1	1	1	1	1	1	1	1	1	1	0	1	1	1	1	1	1	1
566	1237	ATP-dependent endonuclease	-	-	NT80_RS31170;-	false	false	1	1	0.919131	0.091328	0.136629	3.58765	-1.0394	-0.864456	8.786	5.19835	-1.0394	-0.864456	0.0987	0.1028	0	0	0	0	0	0	0	0	0	0	0	0	0	0	0	0	0	0	0	0	0	0	0	0	0	0	0	0
567	1238	S-type pyocin protein	PA14_RS05595;PA14_13940	PA3866;-	PA14_RS05595;PA14_13940	false	false	11	11	0.100771	0.903127	0.268171	-0.901965	0.996664	0.571589	4.55618	5.45815	0.996664	0.571589	0.0971	0.1321	1	0	1	1	1	0	0	0	0	0	0	0	1	0	0	0	0	0	1	0	1	0	0	0	0	0	0	0
568	1240	hypothetical protein	-	-	NT42_RS11940;-	false	false	1	1	0.0478789	0.9584	0.106776	-3.87996	1.31986	0.971528	1.462	5.34196	1.31986	0.971528	0	0.008	1	0	0	0	0	0	0	0	0	0	0	0	0	0	0	0	0	0	0	0	0	0	0	0	0	0	0	0
569	1241	peptidyl-prolyl cis-trans isomerase	PA14_RS16475;PA14_40640	PA1846;-	PA14_RS16475;PA14_40640	false	false	52	52	1	1	1	0	0	0	5.26735	NaN	0	0	0	0	1	1	1	1	1	1	1	1	1	1	1	1	1	1	1	1	1	1	1	1	1	1	1	1	1	1	1	1
570	1242	hypothetical protein	PA14_RS20525;PA14_50570	PA1069;-	PA14_RS20525;PA14_50570	false	false	52	52	1	1	1	0	0	0	5.26735	NaN	0	0	0	0	1	1	1	1	1	1	1	1	1	1	1	1	1	1	1	1	1	1	1	1	1	1	1	1	1	1	1	1
571	1243	DEAD/DEAH box helicase	PA14_RS24285;PA14_59540	-	PA14_RS24285;PA14_59540	false	true	25	21	0.0768331	0.92582	0.119505	-1.04921	1.11445	0.922615	4.64186	5.69106	1.11445	0.922615	0.0735	0.059	0	1	1	1	0	0	0	0	1	0	1	1	0	0	0	0	0	2	1	1	2	1	0	1	0	0	1	2
572	1245	PAS domain-containing sensor histidine kinase	PA14_RS03910;PA14_09680	PA4197;-	PA14_RS03910;PA14_09680	false	false	52	51	0.0548941	0.952121	0.041044	-4.87643	1.26047	1.38675	5.17357	10.05	1.26047	1.38675	0.0208	0.0245	1	1	1	1	1	1	1	1	1	1	1	1	1	1	1	1	1	1	1	1	1	1	1	1	1	1	1	1
573	1247	conjugal transfer protein TraI	-	-	NT49_RS27900;-	false	false	1	1	0.27436	0.747394	0.463851	-1.78059	0.561679	0.333622	3.521	5.30159	0.561679	0.333622	0.3131	0.3252	0	0	0	0	0	0	0	0	0	0	0	0	0	0	0	0	1	0	0	0	0	0	0	0	0	0	0	0
574	1249	acyl-homoserine lactone acylase subunit beta	PA14_RS13790;PA14_33820	PA2385;-	PA14_RS13790;PA14_33820	false	false	50	50	0.275988	0.739689	0.476822	-1.23516	0.55911	0.321643	5.21984	6.455	0.55911	0.321643	0.2767	0.2357	1	1	1	1	1	1	1	1	1	1	1	1	1	1	1	1	1	1	1	1	0	1	1	1	1	1	1	1
575	1251	DEAD/DEAH box helicase	-	-	ACP77_RS12090;-	false	true	31	22	0.964533	0.0369379	0.086481	1.14442	-1.43253	-1.06308	5.92759	4.78317	-1.43253	-1.06308	0.0356	0.0447	0	1	3	0	0	0	0	1	0	0	0	0	0	0	0	0	0	2	1	0	1	0	0	1	0	2	0	1
576	1253	helicase	PA14_RS21955;PA14_53900	PA0799;-	PA14_RS21955;PA14_53900	false	false	51	51	0.115194	0.897242	0.170482	-3.30929	0.93857	0.768321	5.20371	8.513	0.93857	0.768321	0.1357	0.1393	1	1	1	1	1	1	1	1	1	1	1	1	1	1	1	1	1	1	1	1	1	1	1	1	1	1	1	1
577	1254	phosphate ABC transporter permease	PA14_RS28850;PA14_70850	PA5368;-	PA14_RS28850;PA14_70850	false	false	52	52	1	1	1	0	0	0	5.26735	NaN	0	0	0	0	1	1	1	1	1	1	1	1	1	1	1	1	1	1	1	1	1	1	1	1	1	1	1	1	1	1	1	1
578	1255	chemotaxis protein CheA	PA14_RS18515;PA14_45590	PA1458;-	PA14_RS18515;PA14_45590	false	false	45	45	0.363718	0.646299	0.818024	-0.225594	0.439235	0.0872339	5.23698	5.46257	0.439235	0.0872339	0.3569	0.3974	1	1	1	1	1	1	1	1	1	1	1	1	0	1	1	1	1	1	1	0	0	1	1	1	1	1	1	0
579	1256	type II secretion system protein	-	PA1382;-	PA1382;-	false	false	28	28	0.866616	0.137377	0.356647	0.616286	-0.862086	-0.447762	5.55179	4.9355	-0.862086	-0.447762	0.1378	0.1763	1	0	0	0	1	0	1	1	0	0	0	0	1	1	0	1	1	0	0	1	0	0	1	1	0	1	1	1
580	1257	hypothetical protein	-	-	Q009_RS26700;Q009_03868	false	false	4	4	0.702735	0.309262	0.695404	0.491458	-0.509673	-0.157763	5.721	5.22954	-0.509673	-0.157763	0.3046	0.3409	0	0	0	0	0	0	0	0	0	0	0	0	0	0	0	0	0	1	0	0	0	1	0	0	0	0	0	0
581	1261	phosphoenolpyruvate-protein phosphotransferase PtsP	PA14_RS01795;PA14_04410	PA0337;-	PA14_RS01795;PA14_04410	true	false	50	50	0.639409	0.378548	0.741701	0.5734	-0.421879	-0.129771	5.2894	4.716	-0.421879	-0.129771	0.3687	0.4147	1	1	1	1	1	1	1	1	1	1	1	1	1	1	1	1	1	1	1	1	0	1	1	1	0	1	1	1
582	1262	ATPase AAA	-	-	Q012_RS25900;Q012_03795	false	false	1	1	0.605082	0.420782	0.909186	0.278	-0.375943	-0.0413471	5.54	5.262	-0.375943	-0.0413471	0.4281	0.438	0	0	0	0	0	0	0	0	0	0	0	0	0	0	0	0	0	0	0	0	0	0	0	0	0	0	0	0
583	1263	peptidase	-	-	NR40_RS03155;-	false	false	3	3	0.970207	0.0325482	0.132567	2.13482	-1.48747	-0.877564	7.279	5.14418	-1.48747	-0.877564	0.0268	0.0765	0	0	0	0	0	0	0	0	0	0	0	0	0	0	0	0	0	0	0	0	0	0	0	0	0	0	0	0
584	1265	ATP-dependent Clp protease ATP-binding subunit ClpA	PA14_RS12320;PA14_30230	PA2620;-	PA14_RS12320;PA14_30230	true	false	52	52	1	1	1	0	0	0	5.26735	NaN	0	0	0	0	1	1	1	1	1	1	1	1	1	1	1	1	1	1	1	1	1	1	1	1	1	1	1	1	1	1	1	1
585	1266	ATP-dependent DNA helicase	PA14_RS16370;PA14_40350	PA1866;-	PA14_RS16370;PA14_40350	false	false	52	52	1	1	1	0	0	0	5.26735	NaN	0	0	0	0	1	1	1	1	1	1	1	1	1	1	1	1	1	1	1	1	1	1	1	1	1	1	1	1	1	1	1	1
586	1269	lysine decarboxylase	PA14_RS16625;PA14_41020	PA1818;-	PA14_RS16625;PA14_41020	false	false	52	52	1	1	1	0	0	0	5.26735	NaN	0	0	0	0	1	1	1	1	1	1	1	1	1	1	1	1	1	1	1	1	1	1	1	1	1	1	1	1	1	1	1	1
587	1272	beta-agarase	PA14_RS20645;PA14_50830	PA1046;-	PA14_RS20645;PA14_50830	false	false	48	48	0.04144	0.961516	0.169783	-1.70831	1.38258	0.770106	5.13594	6.84425	1.38258	0.770106	0.0395	0.0942	1	1	1	1	1	1	1	1	1	1	1	1	1	1	1	1	1	1	1	1	1	1	1	1	1	1	1	1
588	1273	restriction endonuclease	-	-	NT80_RS25635;-	false	false	3	3	0.347357	0.667025	0.831946	-0.304585	0.459225	0.0799051	4.98033	5.28492	0.459225	0.0799051	0.3414	0.4366	0	0	1	0	0	0	0	0	0	0	0	0	0	0	0	0	0	0	1	0	0	0	0	0	0	0	0	0
589	1276	VgrG1	PA14_RS00460;PA14_01110	PA0091;-	PA14_RS00460;PA14_01110	false	false	134	51	0.5	0.526562	0.997882	0.00647059	0.30103	-0.000920888	5.26747	5.261	0.30103	-0.000920888	0.4747	0.5209	1	3	3	3	3	3	3	3	1	3	3	2	1	3	3	3	3	3	3	2	1	3	3	3	1	1	0	3
590	1279	protein involved in RimO-mediated beta-methylthiolation of ribosomal protein S12 YcaO	PA14_RS16050;PA14_39610	PA1926;-	PA14_RS16050;PA14_39610	false	false	52	52	1	1	1	0	0	0	5.26735	NaN	0	0	0	0	1	1	1	1	1	1	1	1	1	1	1	1	1	1	1	1	1	1	1	1	1	1	1	1	1	1	1	1
591	1281	hypothetical protein	-	-	NQ81_RS01890;-	false	false	1	1	0.320458	0.703	0.566684	-1.39416	0.494228	0.246659	3.9	5.29416	0.494228	0.246659	0.3477	0.3494	0	0	0	0	0	0	0	0	0	0	0	0	0	0	0	0	0	0	1	0	0	0	0	0	0	0	0	0
592	1284	hypothetical protein	-	-	NT11_RS16550;-	false	false	6	6	0.885507	0.120131	0.316262	1.0447	-0.920346	-0.499953	6.1915	5.1468	-0.920346	-0.499953	0.1211	0.161	0	0	0	0	0	0	0	0	1	0	0	0	0	0	0	1	0	0	0	0	0	0	0	0	0	0	0	0
593	1286	DNA topoisomerase 4 subunit A	PA14_RS26800;PA14_65605	PA4964;-	PA14_RS26800;PA14_65605	false	false	52	52	1	1	1	0	0	0	5.26735	NaN	0	0	0	0	1	1	1	1	1	1	1	1	1	1	1	1	1	1	1	1	1	1	1	1	1	1	1	1	1	1	1	1
594	1287	thymidine phosphorylase	PA14_RS23930;PA14_58690	PA4523;-	PA14_RS23930;PA14_58690	false	false	51	51	0.102758	0.908672	0.143718	-3.52545	0.988183	0.84249	5.19955	8.725	0.988183	0.84249	0.1152	0.1196	1	1	1	1	1	1	1	1	1	1	1	1	1	1	1	1	1	1	1	1	1	1	1	1	1	1	1	1
595	1288	conjugal transfer protein TraY	-	-	ACP77_RS18170;-	false	false	10	10	0.808041	0.198363	0.432614	0.664429	-0.702538	-0.363899	5.804	5.13957	-0.702538	-0.363899	0.1912	0.2112	0	0	0	0	0	0	0	0	0	0	0	0	1	0	0	0	0	0	1	0	1	0	0	0	0	1	1	0
596	1289	phage tail length tape measure protein	PA14_RS03255;PA14_08120	PA0625;-	PA14_RS03255;PA14_08120	false	false	34	34	0.987482	0.0131548	0.0595487	1.30223	-1.88092	-1.22513	5.71812	4.41589	-1.88092	-1.22513	0.0122	0.0293	1	0	0	1	0	0	0	0	1	1	0	1	1	0	0	1	0	1	0	1	1	1	0	1	0	1	1	1
597	1290	glycogen-branching enzyme	PA14_RS14945;PA14_36710	PA2153;-	PA14_RS14945;PA14_36710	false	false	51	51	0.747394	0.27436	0.463851	1.78059	-0.561679	-0.333622	5.30159	3.521	-0.561679	-0.333622	0.3131	0.3295	1	1	1	1	1	1	1	1	1	1	1	1	1	1	1	1	0	1	1	1	1	1	1	1	1	1	1	1
598	1292	metal-transporting P-type ATPase	PA14_RS06675;PA14_16660	PA3690;-	PA14_RS06675;PA14_16660	false	false	51	51	0.0626977	0.945106	0.0763877	-4.25141	1.20275	1.11698	5.18559	9.437	1.20275	1.11698	0.0371	0.042	1	1	1	1	1	1	1	1	1	1	1	1	1	1	1	1	1	1	1	1	1	1	1	1	1	1	1	1
599	1293	hybrid sensor histidine kinase/response regulator	PA14_RS26890;PA14_65860	PA4982;-	PA14_RS26890;PA14_65860	false	false	52	52	1	1	1	0	0	0	5.26735	NaN	0	0	0	0	1	1	1	1	1	1	1	1	1	1	1	1	1	1	1	1	1	1	1	1	1	1	1	1	1	1	1	1
600	1295	hybrid sensor histidine kinase/response regulator	PA14_RS10015;PA14_24720	PA3044;-	PA14_RS10015;PA14_24720	false	false	51	51	0.128664	0.884806	0.205412	-3.06153	0.890542	0.687374	5.20847	8.27	0.890542	0.687374	0.1536	0.1582	1	1	1	1	1	1	1	1	1	1	1	1	1	1	1	1	1	1	1	1	1	1	1	1	1	1	1	1
601	1298	TonB-dependent receptor	PA14_RS23885;PA14_58570	PA4514;-	PA14_RS23885;PA14_58570	false	false	27	27	0.294496	0.711787	0.569512	-0.380436	0.53092	0.244497	5.08444	5.46488	0.53092	0.244497	0.2854	0.2812	1	1	1	1	0	1	0	0	1	0	1	1	1	0	1	1	0	0	1	1	1	0	0	0	0	0	0	0
602	1300	hypothetical protein	-	-	P998_RS17745;P998_02273	false	false	2	2	0.317094	0.699661	0.557969	-1.018	0.498812	0.25339	4.2885	5.3065	0.498812	0.25339	0.3135	0.3034	0	0	0	0	0	0	0	0	1	0	0	0	0	0	0	0	0	0	0	0	0	0	0	0	0	0	0	0
603	1306	outer membrane receptor FepA	PA14_RS11970;PA14_29350	PA2688;-	PA14_RS11970;PA14_29350	false	false	51	51	0.102758	0.908672	0.143718	-3.52545	0.988183	0.84249	5.19955	8.725	0.988183	0.84249	0.1152	0.1196	1	1	1	1	1	1	1	1	1	1	1	1	1	1	1	1	1	1	1	1	1	1	1	1	1	1	1	1
604	1308	thiamine biosynthesis protein ThiF	-	-	Q009_RS07915;Q009_00001	false	false	3	1	0.394918	0.630492	0.755716	-0.757922	0.403493	0.121641	4.524	5.28192	0.403493	0.121641	0.4021	0.4067	0	0	0	0	0	0	0	0	0	0	0	0	0	0	0	0	0	0	0	0	0	3	0	0	0	0	0	0
605	1309	bacteriophage protein	-	-	ACP77_RS03085;-	false	true	11	11	0.983815	0.0171124	0.0170206	1.90085	-1.76669	-1.76903	6.76609	4.86524	-1.76669	-1.76903	0.0176	0.0123	0	0	0	0	0	0	0	1	0	1	0	0	0	0	0	0	0	0	0	0	0	0	0	0	0	0	0	1
606	1310	cell envelope biogenesis protein AsmA	PA14_RS27720;PA14_67975	PA5146;-	PA14_RS27720;PA14_67975	false	false	51	51	0.115194	0.897242	0.170482	-3.30929	0.93857	0.768321	5.20371	8.513	0.93857	0.768321	0.1357	0.1393	1	1	1	1	1	1	1	1	1	1	1	1	1	1	1	1	1	1	1	1	1	1	1	1	1	1	1	1
607	1312	aldehyde dehydrogenase	PA14_RS17790;PA14_43790	PA1601;-	PA14_RS17790;PA14_43790	false	false	52	52	1	1	1	0	0	0	5.26735	NaN	0	0	0	0	1	1	1	1	1	1	1	1	1	1	1	1	1	1	1	1	1	1	1	1	1	1	1	1	1	1	1	1
608	1313	hypothetical protein	-	-	Q012_RS0107025;-	false	false	1	1	0.605082	0.420782	0.909186	0.278	-0.375943	-0.0413471	5.54	5.262	-0.375943	-0.0413471	0.4281	0.438	0	0	0	0	0	0	0	0	0	0	0	0	0	0	0	0	0	0	0	0	0	0	0	0	0	0	0	0
609	1314	hypothetical protein	-	-	NR40_RS21255;-	false	true	3	3	0.795082	0.216246	0.494049	0.979497	-0.665052	-0.30623	6.19033	5.21084	-0.665052	-0.30623	0.2076	0.237	0	0	0	0	0	0	0	0	0	0	0	0	1	0	0	0	0	0	0	0	0	0	0	0	0	0	0	0
610	1315	HlyD family type I secretion periplasmic adaptor subunit	PA14_RS08025;PA14_20040	PA3405;-	PA14_RS08025;PA14_20040	false	false	51	51	0.841216	0.175453	0.370223	2.17518	-0.75584	-0.431536	5.30918	3.134	-0.75584	-0.431536	0.21	0.2256	1	1	1	1	1	1	1	1	1	1	1	0	1	1	1	1	1	1	1	1	1	1	1	1	1	1	1	1
611	1316	arylsulfatase	PA14_RS00935;PA14_02310	PA0183;-	PA14_RS00935;PA14_02310	false	false	103	52	1	1	1	0	0	0	5.26735	NaN	0	0	0	0	2	2	2	2	2	1	2	2	2	2	2	2	2	2	2	2	2	2	2	2	2	2	2	2	2	2	2	2
612	1317	conjugal transfer protein TraC	-	-	Q009_RS17740;Q009_02004	false	true	10	10	0.605271	0.403694	0.952287	-0.050819	-0.393947	0.021232	5.2263	5.27712	-0.393947	0.021232	0.3985	0.4827	0	0	0	0	0	0	0	1	0	0	0	0	0	0	0	1	1	0	0	0	0	1	0	0	1	1	0	0
613	1318	hypothetical protein	-	-	Q012_RS15460;Q012_01648	false	false	1	1	0.605082	0.420782	0.909186	0.278	-0.375943	-0.0413471	5.54	5.262	-0.375943	-0.0413471	0.4281	0.438	0	0	0	0	0	0	0	0	0	0	0	0	0	0	0	0	0	0	0	0	0	0	0	0	0	0	0	0
614	1319	hypothetical protein	-	-	NS72_RS02165;-	false	false	1	1	0.897242	0.115194	0.170482	3.30929	-0.93857	-0.768321	8.513	5.20371	-0.93857	-0.768321	0.1357	0.137	0	0	0	0	0	0	0	0	0	0	0	0	0	0	0	0	0	0	0	0	0	0	0	0	0	0	0	0
615	1320	GTP pyrophosphokinase	PA14_RS21245;PA14_52180	PA0934;-	PA14_RS21245;PA14_52180	false	false	52	52	1	1	1	0	0	0	5.26735	NaN	0	0	0	0	1	1	1	1	1	1	1	1	1	1	1	1	1	1	1	1	1	1	1	1	1	1	1	1	1	1	1	1
616	1321	YgiQ family radical SAM protein	PA14_RS26610;PA14_65080	PA4928;-	PA14_RS26610;PA14_65080	false	false	52	52	1	1	1	0	0	0	5.26735	NaN	0	0	0	0	1	1	1	1	1	1	1	1	1	1	1	1	1	1	1	1	1	1	1	1	1	1	1	1	1	1	1	1
617	1323	histidine kinase	-	-	PACIG1_RS28910;PACIG1_5498	false	false	2	2	0.189347	0.823268	0.377467	-1.5302	0.722742	0.423121	3.796	5.3262	0.722742	0.423121	0.1876	0.1904	0	0	0	0	0	0	0	0	0	0	0	0	1	0	0	0	0	0	0	0	1	0	0	0	0	0	0	0
618	1324	lipase	-	-	Y880_RS18980;-	false	false	6	6	0.808829	0.19907	0.278658	1.12835	-0.700994	-0.554929	6.2655	5.13715	-0.700994	-0.554929	0.2029	0.1473	0	1	0	0	0	0	0	0	0	0	0	0	0	1	0	0	0	0	0	0	0	0	0	0	0	0	0	0
619	1328	aldehyde oxidase	PA14_RS16295;PA14_40200	PA1880;-	PA14_RS16295;PA14_40200	false	false	52	52	1	1	1	0	0	0	5.26735	NaN	0	0	0	0	1	1	1	1	1	1	1	1	1	1	1	1	1	1	1	1	1	1	1	1	1	1	1	1	1	1	1	1
620	1329	bifunctional prephenate dehydrogenase/3-phosphoshikimate 1-carboxyvinyltransferase	PA14_RS09435;PA14_23310	-	PA14_RS09435;PA14_23310	false	false	51	51	0.211979	0.806811	0.629571	-1.17424	0.673707	0.200955	5.24476	6.419	0.673707	0.200955	0.2572	0.2622	1	1	1	1	1	1	1	1	1	1	1	1	1	1	1	1	1	1	1	1	1	1	1	1	1	1	1	1
621	1332	hypothetical protein	-	-	NS42_RS32285;-	false	false	2	2	0.912474	0.0953412	0.2283	2.08172	-1.02072	-0.641494	7.269	5.18728	-1.02072	-0.641494	0.1023	0.1332	0	0	0	0	0	0	0	0	0	0	0	0	0	0	0	0	0	0	0	0	0	0	0	0	0	0	0	0
622	1334	hypothetical protein	PA14_RS27425;PA14_67220	PA5089;-	PA14_RS27425;PA14_67220	false	false	52	51	0.630492	0.394918	0.755716	0.757922	-0.403493	-0.121641	5.28192	4.524	-0.403493	-0.121641	0.4021	0.4159	1	1	1	1	1	1	1	1	1	1	1	1	2	1	1	1	1	1	1	1	1	0	1	1	1	1	1	1
623	1335	conjugative coupling factor TraD, PFGI-1 class	PA14_RS24340;PA14_59690	-	-	false	false	35	33	0.265294	0.740896	0.38107	-0.606536	0.576272	0.418995	5.04573	5.65226	0.576272	0.418995	0.2557	0.1864	1	1	1	1	0	0	0	0	1	1	1	1	1	0	0	1	0	2	1	1	0	1	0	1	1	0	1	1
624	1336	DEAD/DEAH box helicase	PA14_RS11745;PA14_28840	-	PA14_RS11745;PA14_28840	false	false	4	4	0.219859	0.79017	0.393601	-1.06773	0.657856	0.404943	4.28175	5.34948	0.657856	0.404943	0.2158	0.2015	0	0	0	1	0	0	0	0	0	0	0	1	0	0	0	0	0	0	0	0	0	0	0	0	0	0	0	0
625	1339	competence protein ComEC	PA14_RS10325;PA14_25480	PA2984;-	PA14_RS10325;PA14_25480	false	false	23	23	0.401784	0.605326	0.706938	-0.253214	0.396008	0.150619	5.12613	5.37934	0.396008	0.150619	0.3902	0.3482	0	1	0	1	0	0	0	0	0	1	1	0	1	1	0	0	0	1	1	1	1	1	0	0	0	1	1	1
626	1341	hypothetical protein	-	-	NQ81_RS26715;-	false	false	1	1	0.320458	0.703	0.566684	-1.39416	0.494228	0.246659	3.9	5.29416	0.494228	0.246659	0.3477	0.3494	0	0	0	0	0	0	0	0	0	0	0	0	0	0	0	0	0	0	1	0	0	0	0	0	0	0	0	0
627	1342	CRISPR-associated helicase/endonuclease Cas3	-	-	NT11_RS05395;-	false	false	8	8	0.791489	0.215865	0.684204	0.377034	-0.665818	-0.164814	5.58638	5.20934	-0.665818	-0.164814	0.2194	0.3349	0	0	0	0	0	0	0	0	1	0	0	0	0	0	0	1	0	0	0	0	0	0	0	0	1	0	0	0
628	1343	hypothetical protein	-	-	NT80_RS04480;-	false	false	4	4	0.990672	0.0102244	0.0351927	2.58744	-1.99036	-1.45355	7.65575	5.06831	-1.99036	-1.45355	0.0073	0.022	0	0	0	0	0	0	0	0	0	0	0	0	0	0	0	0	0	0	0	0	0	0	0	0	0	0	0	0
629	1346	hypothetical protein	-	-	JF43_RS29295;JF43_29615	false	false	1	1	0.768203	0.252606	0.684151	0.990706	-0.597556	-0.164848	6.239	5.24829	-0.597556	-0.164848	0.2907	0.2932	0	0	0	0	0	0	0	0	0	0	0	0	0	0	0	0	0	0	0	0	0	0	0	0	0	0	0	0
630	1347	hypothetical protein	-	-	NQ67_RS22045;-	false	false	1	1	0.92866	0.0808686	0.103292	3.918	-1.09222	-0.985933	9.11	5.192	-1.09222	-0.985933	0.0776	0.0812	0	0	0	0	0	0	0	0	0	0	0	0	0	0	0	0	0	0	0	0	0	0	0	0	0	0	0	0
631	1349	glycosyl transferase family 2	PA14_RS03785;PA14_09320	PA4222;-	PA14_RS03785;PA14_09320	false	false	49	49	0.0496392	0.954257	0.0630541	-2.62263	1.30418	1.20029	5.11604	7.73867	1.30418	1.20029	0.047	0.0405	1	1	1	1	1	1	1	1	1	1	1	1	1	1	1	1	1	1	1	1	1	1	1	1	1	1	1	0
632	1353	outer membrane receptor FepA	PA14_RS21260;PA14_52230	PA0931;-	PA14_RS21260;PA14_52230	false	false	52	51	0.07134	0.937302	0.0796457	-4.20655	1.14667	1.09884	5.18645	9.393	1.14667	1.09884	0.0581	0.0631	1	1	1	1	1	1	1	1	1	1	1	1	1	1	1	1	1	1	1	1	1	1	1	1	1	1	2	1
633	1354	TonB-dependent receptor	PA14_RS25270;PA14_61850	PA4675;-	PA14_RS25270;PA14_61850	false	false	52	52	1	1	1	0	0	0	5.26735	NaN	0	0	0	0	1	1	1	1	1	1	1	1	1	1	1	1	1	1	1	1	1	1	1	1	1	1	1	1	1	1	1	1
634	1356	isocitrate dehydrogenase	PA14_RS12300;PA14_30180	PA2624;-	PA14_RS12300;PA14_30180	false	false	52	52	1	1	1	0	0	0	5.26735	NaN	0	0	0	0	1	1	1	1	1	1	1	1	1	1	1	1	1	1	1	1	1	1	1	1	1	1	1	1	1	1	1	1
635	1361	DEAD/DEAH box helicase	-	-	NT05_RS05365;-	false	false	2	2	0.325617	0.691333	0.586555	-0.9452	0.487293	0.231691	4.3585	5.3037	0.487293	0.231691	0.3183	0.3241	0	0	0	0	0	0	0	0	0	0	0	0	0	0	0	0	0	0	1	0	0	0	0	1	0	0	0	0
636	1362	peptidase S8	-	-	ACP77_RS15135;-	false	false	2	2	0.919801	0.0875262	0.122612	2.65528	-1.05786	-0.911466	7.8205	5.16522	-1.05786	-0.911466	0.0944	0.0698	0	0	0	0	0	0	0	0	0	0	0	0	0	0	0	0	0	0	0	0	0	0	0	0	0	0	0	0
637	1363	hypothetical protein	-	-	NQ67_RS24730;-	false	false	1	1	0.92866	0.0808686	0.103292	3.918	-1.09222	-0.985933	9.11	5.192	-1.09222	-0.985933	0.0776	0.0812	0	0	0	0	0	0	0	0	0	0	0	0	0	0	0	0	0	0	0	0	0	0	0	0	0	0	0	0
638	1368	primosomal protein N'	PA14_RS27235;PA14_66720	PA5050;-	PA14_RS27235;PA14_66720	false	false	52	52	1	1	1	0	0	0	5.26735	NaN	0	0	0	0	1	1	1	1	1	1	1	1	1	1	1	1	1	1	1	1	1	1	1	1	1	1	1	1	1	1	1	1
639	1369	mechanosensitive ion channel protein	PA14_RS27585;PA14_67630	PA5121;-	PA14_RS27585;PA14_67630	false	false	52	52	1	1	1	0	0	0	5.26735	NaN	0	0	0	0	1	1	1	1	1	1	1	1	1	1	1	1	1	1	1	1	1	1	1	1	1	1	1	1	1	1	1	1
640	1370	outer membrane assembly lipoprotein YfiO	PA14_RS29250;PA14_71840	PA5441;-	PA14_RS29250;PA14_71840	false	false	52	52	1	1	1	0	0	0	5.26735	NaN	0	0	0	0	1	1	1	1	1	1	1	1	1	1	1	1	1	1	1	1	1	1	1	1	1	1	1	1	1	1	1	1
641	1371	aldehyde oxidase	PA14_RS16015;PA14_39520	PA1933;-	PA14_RS16015;PA14_39520	false	false	41	41	0.67297	0.335155	0.851251	0.153672	-0.474755	-0.0699424	5.29985	5.14618	-0.474755	-0.0699424	0.3353	0.437	0	1	0	1	1	0	1	1	1	1	1	1	1	0	0	1	1	1	0	1	1	1	1	1	1	1	1	1
642	1372	exodeoxyribonuclease	-	-	NS72_RS02550;-	false	false	1	1	0.897242	0.115194	0.170482	3.30929	-0.93857	-0.768321	8.513	5.20371	-0.93857	-0.768321	0.1357	0.137	0	0	0	0	0	0	0	0	0	0	0	0	0	0	0	0	0	0	0	0	0	0	0	0	0	0	0	0
643	1373	hypothetical protein	-	-	ACP77_RS20380;-	false	true	9	8	0.78783	0.219597	0.48825	0.641466	-0.658373	-0.311358	5.81013	5.16866	-0.658373	-0.311358	0.2138	0.2402	1	0	0	0	0	0	0	0	0	0	0	0	1	0	0	0	0	0	0	0	1	0	0	0	0	0	0	0
644	1374	DNA topoisomerase III	-	-	P998_RS17085;P998_05857	false	true	3	3	0.915222	0.0910383	0.255696	1.62118	-1.04078	-0.592276	6.795	5.17382	-1.04078	-0.592276	0.0917	0.1371	0	0	0	0	0	0	0	0	0	0	0	0	0	0	0	0	0	0	0	0	0	0	0	0	0	0	0	0
645	1376	ABC transporter ATP-binding protein/permease	PA14_RS16315;PA14_40240	PA1876;-	PA14_RS16315;PA14_40240	false	false	51	51	0.703	0.320458	0.566684	1.39416	-0.494228	-0.246659	5.29416	3.9	-0.494228	-0.246659	0.3477	0.363	1	1	1	1	1	1	1	1	1	1	1	1	1	1	1	1	1	1	0	1	1	1	1	1	1	1	1	1
646	1378	RNA degradosome polyphosphate kinase	PA14_RS28215;PA14_69230	PA5242;-	PA14_RS28215;PA14_69230	false	false	52	52	1	1	1	0	0	0	5.26735	NaN	0	0	0	0	1	1	1	1	1	1	1	1	1	1	1	1	1	1	1	1	1	1	1	1	1	1	1	1	1	1	1	1
647	1383	hypothetical protein	-	-	Q009_RS28720;Q009_04288	false	true	17	13	0.542076	0.466317	0.879084	0.11759	-0.331319	-0.0559698	5.35554	5.23795	-0.331319	-0.0559698	0.4594	0.434	0	0	1	0	0	0	0	0	0	0	0	1	1	0	0	0	0	1	0	1	1	4	0	0	0	0	0	0
648	1384	diguanylate cyclase	PA14_RS21705;PA14_53310	PA0847;-	PA14_RS21705;PA14_53310	false	false	52	52	1	1	1	0	0	0	5.26735	NaN	0	0	0	0	1	1	1	1	1	1	1	1	1	1	1	1	1	1	1	1	1	1	1	1	1	1	1	1	1	1	1	1
649	1385	hypothetical protein	-	-	NT54_RS02965;-	false	false	2	2	0.0669499	0.939006	0.159818	-2.42252	1.17425	0.796374	2.938	5.36052	1.17425	0.796374	0.0704	0.0765	0	0	0	0	0	1	0	0	0	0	0	0	0	0	1	0	0	0	0	0	0	0	0	0	0	0	0	0
650	1389	hypothetical protein	-	-	NQ81_RS01785;-	false	false	1	1	0.320458	0.703	0.566684	-1.39416	0.494228	0.246659	3.9	5.29416	0.494228	0.246659	0.3477	0.3494	0	0	0	0	0	0	0	0	0	0	0	0	0	0	0	0	0	0	1	0	0	0	0	0	0	0	0	0
651	1390	membrane protein	PA14_RS02390;PA14_05920	PA0454;-	PA14_RS02390;PA14_05920	false	false	52	52	1	1	1	0	0	0	5.26735	NaN	0	0	0	0	1	1	1	1	1	1	1	1	1	1	1	1	1	1	1	1	1	1	1	1	1	1	1	1	1	1	1	1
652	1392	TonB-dependent receptor	PA14_RS19165;PA14_47140	PA1322;-	PA14_RS19165;PA14_47140	false	false	52	52	1	1	1	0	0	0	5.26735	NaN	0	0	0	0	1	1	1	1	1	1	1	1	1	1	1	1	1	1	1	1	1	1	1	1	1	1	1	1	1	1	1	1
653	1397	hypothetical protein	-	-	NT47_RS25505;-	false	false	1	1	0.703	0.320458	0.734059	0.827569	-0.494228	-0.134269	6.079	5.25143	-0.494228	-0.134269	0.34	0.349	0	0	0	0	0	0	0	0	0	0	0	0	0	0	0	0	0	0	0	0	0	0	0	0	0	0	0	0
654	1399	chemotaxis protein	PA14_RS00900;PA14_02220	PA0176;-	PA14_RS00900;PA14_02220	false	false	51	51	0.07134	0.937302	0.0796457	-4.20655	1.14667	1.09884	5.18645	9.393	1.14667	1.09884	0.0581	0.0631	1	1	1	1	1	1	1	1	1	1	1	1	1	1	1	1	1	1	1	1	1	1	1	1	1	1	1	1
655	1400	hypothetical protein	-	-	P997_RS31405;P997_05006	false	false	1	1	0.135794	0.878202	0.285721	-2.5871	0.867119	0.544058	2.73	5.3171	0.867119	0.544058	0.1637	0.1691	0	0	0	0	0	0	0	0	0	1	0	0	0	0	0	0	0	0	0	0	0	0	0	0	0	0	0	0
656	1401	outer membrane protein	PA14_RS05445;PA14_13530	PA3893;-	PA14_RS05445;PA14_13530	false	false	51	51	0.0626977	0.945106	0.0763877	-4.25141	1.20275	1.11698	5.18559	9.437	1.20275	1.11698	0.0371	0.042	1	1	1	1	1	1	1	1	1	1	1	1	1	1	1	1	1	1	1	1	1	1	1	1	1	1	1	1
657	1402	hypothetical protein	-	-	P998_RS24215;P998_03591	false	false	4	4	0.398375	0.614817	0.64535	-0.577521	0.399708	0.190205	4.73425	5.31177	0.399708	0.190205	0.39	0.3306	0	0	0	0	0	0	0	0	0	0	0	0	1	0	0	0	0	0	0	1	0	0	0	0	0	0	0	0
658	1404	fusaric acid resistance protein	PA14_RS21560;PA14_52940	PA0875;-	PA14_RS21560;PA14_52940	false	false	52	52	1	1	1	0	0	0	5.26735	NaN	0	0	0	0	1	1	1	1	1	1	1	1	1	1	1	1	1	1	1	1	1	1	1	1	1	1	1	1	1	1	1	1
659	1405	hypothetical protein	-	-	NR77_RS12820;-	false	false	1	1	0.72564	0.297	0.726497	0.852039	-0.527244	-0.138766	6.103	5.25096	-0.527244	-0.138766	0.3225	0.3241	0	0	0	0	0	0	0	0	0	0	0	0	0	0	0	0	0	0	0	0	0	0	0	0	0	0	0	0
660	1406	hypothetical protein	-	-	NT42_RS11950;-	false	false	1	1	0.0478789	0.9584	0.106776	-3.87996	1.31986	0.971528	1.462	5.34196	1.31986	0.971528	0	0.008	1	0	0	0	0	0	0	0	0	0	0	0	0	0	0	0	0	0	0	0	0	0	0	0	0	0	0	0
661	1408	phospholipase C, phosphocholine-specific	PA14_RS21720;PA14_53360	PA0844;-	PA0844;-	false	false	52	52	1	1	1	0	0	0	5.26735	NaN	0	0	0	0	1	1	1	1	1	1	1	1	1	1	1	1	1	1	1	1	1	1	1	1	1	1	1	1	1	1	1	1
662	1409	TonB-dependent receptor	PA14_RS02295;PA14_05640	PA0434;-	PA14_RS02295;PA14_05640	false	false	52	52	1	1	1	0	0	0	5.26735	NaN	0	0	0	0	1	1	1	1	1	1	1	1	1	1	1	1	1	1	1	1	1	1	1	1	1	1	1	1	1	1	1	1
663	1410	aldehyde dehydrogenase	-	-	NT47_RS23215;-	false	false	1	1	0.703	0.320458	0.734059	0.827569	-0.494228	-0.134269	6.079	5.25143	-0.494228	-0.134269	0.34	0.349	0	0	0	0	0	0	0	0	0	0	0	0	0	0	0	0	0	0	0	0	0	0	0	0	0	0	0	0
664	1411	potassium-transporting ATPase subunit B	PA14_RS17625;PA14_43380	PA1625;-	PA14_RS17625;PA14_43380	false	false	53	52	1	1	1	0	0	0	5.26735	NaN	0	0	0	0	1	1	1	2	1	1	1	1	1	1	1	1	1	1	1	1	1	1	1	1	1	1	1	1	1	1	1	1
665	1413	malate synthase G	PA14_RS02535;PA14_06290	PA0482;-	PA14_RS02535;PA14_06290	false	false	52	52	1	1	1	0	0	0	5.26735	NaN	0	0	0	0	1	1	1	1	1	1	1	1	1	1	1	1	1	1	1	1	1	1	1	1	1	1	1	1	1	1	1	1
666	1414	ATPase	PA14_RS04315;PA14_10700	PA4117;-	PA14_RS04315;PA14_10700	false	false	50	50	0.657065	0.360591	0.679294	0.719	-0.442986	-0.167942	5.295	4.576	-0.442986	-0.167942	0.3377	0.3699	1	1	1	1	1	1	1	1	1	1	1	1	1	1	1	1	1	1	1	1	1	0	0	1	1	1	1	1
667	1415	patatin	PA14_RS08390;PA14_20870	PA3339;-	PA14_RS08390;PA14_20870	false	false	52	52	1	1	1	0	0	0	5.26735	NaN	0	0	0	0	1	1	1	1	1	1	1	1	1	1	1	1	1	1	1	1	1	1	1	1	1	1	1	1	1	1	1	1
668	1416	DNA-dependent helicase II	PA14_RS29260;PA14_71870	PA5443;-	PA14_RS29260;PA14_71870	false	false	52	52	1	1	1	0	0	0	5.26735	NaN	0	0	0	0	1	1	1	1	1	1	1	1	1	1	1	1	1	1	1	1	1	1	1	1	1	1	1	1	1	1	1	1
669	1417	hypothetical protein	-	-	NQ81_RS01915;-	false	false	1	1	0.320458	0.703	0.566684	-1.39416	0.494228	0.246659	3.9	5.29416	0.494228	0.246659	0.3477	0.3494	0	0	0	0	0	0	0	0	0	0	0	0	0	0	0	0	0	0	1	0	0	0	0	0	0	0	0	0
670	1418	ligand-gated channel protein	PA14_RS22425;PA14_55050	-	PA14_RS22425;PA14_55050	false	false	4	4	0.219859	0.79017	0.393601	-1.06773	0.657856	0.404943	4.28175	5.34948	0.657856	0.404943	0.2158	0.2015	0	0	0	1	0	0	0	0	0	0	0	1	0	0	0	0	0	0	0	0	0	0	0	0	0	0	0	0
671	1419	TonB-dependent receptor	-	-	NT11_RS05325;-	false	false	2	2	0.0994362	0.908628	0.191711	-2.253	1.00246	0.717354	3.101	5.354	1.00246	0.717354	0.1003	0.0904	0	0	0	0	0	0	0	0	1	0	0	0	0	0	0	1	0	0	0	0	0	0	0	0	0	0	0	0
672	1425	DNA polymerase III subunit gamma/tau	PA14_RS18145;PA14_44630	PA1532;-	PA14_RS18145;PA14_44630	false	false	38	37	0.112775	0.891044	0.281693	-0.790757	0.947786	0.550225	5.03924	5.83	0.947786	0.550225	0.1112	0.1403	1	1	1	1	1	1	1	0	1	1	1	0	1	1	0	1	1	1	1	0	0	1	1	0	1	0	2	0
673	1428	ribosomal RNA large subunit methyltransferase K/L	-	PA3048;-	PA3048;-	false	false	51	51	0.937302	0.07134	0.208544	3.04082	-1.14667	-0.680802	5.32582	2.285	-1.14667	-0.680802	0.0594	0.0729	1	1	1	0	1	1	1	1	1	1	1	1	1	1	1	1	1	1	1	1	1	1	1	1	1	1	1	1
674	1430	hypothetical protein	-	-	Q000_RS19800;Q000_02663	false	false	2	2	0.603228	0.415223	0.744503	0.56696	-0.381718	-0.128134	5.8125	5.24554	-0.381718	-0.128134	0.3994	0.3705	0	0	0	0	0	0	0	0	0	0	1	0	0	0	0	0	0	0	0	0	0	0	0	0	0	0	0	0
675	1432	TonB-dependent copper receptor	PA14_RS05995;PA14_15070	PA3790;-	PA14_RS05995;PA14_15070	false	false	51	51	0.553007	0.473438	0.922567	0.236902	-0.324737	-0.035002	5.2719	5.035	-0.324737	-0.035002	0.463	0.4761	1	1	1	1	1	1	1	1	1	1	1	1	1	1	1	1	1	1	1	1	1	1	1	1	0	1	1	1
676	1436	hypothetical protein	-	-	P998_RS24250;P998_03599	false	false	2	2	0.621452	0.396772	0.906696	0.204	-0.40146	-0.0425383	5.4635	5.2595	-0.40146	-0.0425383	0.3825	0.4505	0	0	0	0	0	0	0	0	0	0	0	0	0	0	0	0	0	0	0	0	0	0	0	0	0	1	0	0
677	1440	Fe(3+)-pyochelin receptor	PA14_RS03790;PA14_09340	PA4221;-	PA14_RS03790;PA14_09340	false	false	52	52	1	1	1	0	0	0	5.26735	NaN	0	0	0	0	1	1	1	1	1	1	1	1	1	1	1	1	1	1	1	1	1	1	1	1	1	1	1	1	1	1	1	1
678	1446	TonB-dependent receptor	PA14_RS08760;PA14_21730	PA3268;-	PA14_RS08760;PA14_21730	false	false	50	50	0.93305	0.073346	0.186852	2.27744	-1.13462	-0.728502	5.35494	3.0775	-1.13462	-0.728502	0.0784	0.0951	1	1	0	1	1	1	1	1	1	1	1	1	1	1	1	1	1	1	0	1	1	1	1	1	1	1	1	1
679	1447	integrase	-	-	PABE173_RS29245;PABE173_5403	false	false	1	1	0.193189	0.824547	0.384173	-2.11298	0.714017	0.415473	3.195	5.30798	0.714017	0.415473	0.2293	0.2301	0	0	0	0	0	0	0	0	0	0	0	0	1	0	0	0	0	0	0	0	0	0	0	0	0	0	0	0
680	1451	TonB-dependent receptor	PA14_RS10705;PA14_26420	PA2911;-	PA14_RS10705;PA14_26420	false	false	50	50	0.103658	0.904659	0.219229	-2.12228	0.984396	0.659102	5.18572	7.308	0.984396	0.659102	0.1084	0.1266	1	1	1	1	1	1	1	1	1	1	1	1	1	1	1	1	1	1	1	1	1	1	1	1	1	1	1	1
681	1452	exodeoxyribonuclease V subunit alpha	-	-	PABE173_RS26885;PABE173_4969	false	false	1	1	0.193189	0.824547	0.384173	-2.11298	0.714017	0.415473	3.195	5.30798	0.714017	0.415473	0.2293	0.2301	0	0	0	0	0	0	0	0	0	0	0	0	1	0	0	0	0	0	0	0	0	0	0	0	0	0	0	0
682	1455	ABC transporter	PA14_RS04185;PA14_10340	PA4143;-	PA14_RS04185;PA14_10340	false	false	43	43	0.685724	0.322909	0.92304	0.0854729	-0.49092	-0.0347793	5.28214	5.19667	-0.49092	-0.0347793	0.3174	0.4691	0	1	1	1	1	1	0	0	1	1	1	1	0	1	1	1	1	1	1	1	0	1	1	1	1	1	1	0
683	1460	hypothetical protein	-	-	NT42_RS19785;-	false	false	1	1	0.0478789	0.9584	0.106776	-3.87996	1.31986	0.971528	1.462	5.34196	1.31986	0.971528	0	0.008	1	0	0	0	0	0	0	0	0	0	0	0	0	0	0	0	0	0	0	0	0	0	0	0	0	0	0	0
684	1463	hypothetical protein	PA14_RS01295;PA14_03200	PA0260;-	PA14_RS01295;PA14_03200	false	false	44	43	0.423281	0.586167	0.637879	-0.415984	0.373371	0.195261	5.19535	5.61133	0.373371	0.195261	0.4127	0.3131	0	0	1	1	1	1	1	1	1	1	1	1	2	0	1	1	1	1	1	1	1	1	1	1	0	1	1	0
685	1465	acyl-CoA synthetase	PA14_RS20795;PA14_51170	PA1017;-	PA14_RS20795;PA14_51170	false	false	52	52	1	1	1	0	0	0	5.26735	NaN	0	0	0	0	1	1	1	1	1	1	1	1	1	1	1	1	1	1	1	1	1	1	1	1	1	1	1	1	1	1	1	1
686	1466	regulatory protein NosR	PA14_RS08100;PA14_20230	PA3391;-	PA14_RS08100;PA14_20230	false	false	52	52	1	1	1	0	0	0	5.26735	NaN	0	0	0	0	1	1	1	1	1	1	1	1	1	1	1	1	1	1	1	1	1	1	1	1	1	1	1	1	1	1	1	1
687	1469	hypothetical protein	PA14_RS16005;PA14_39480	-	PA14_RS16005;PA14_39480	false	false	4	4	0.219859	0.79017	0.393601	-1.06773	0.657856	0.404943	4.28175	5.34948	0.657856	0.404943	0.2158	0.2015	0	0	0	1	0	0	0	0	0	0	0	1	0	0	0	0	0	0	0	0	0	0	0	0	0	0	0	0
688	1473	glycogen debranching enzyme	PA14_RS14910;PA14_36630	PA2160;-	PA14_RS14910;PA14_36630	false	false	50	50	0.275988	0.739689	0.476077	-1.23724	0.55911	0.322323	5.21976	6.457	0.55911	0.322323	0.2678	0.2251	1	1	1	1	1	1	1	1	1	1	1	1	1	1	1	1	0	1	1	1	1	1	1	1	1	1	1	1
689	1475	hypothetical protein	-	-	NS42_RS26120;-	false	false	2	2	0.912474	0.0953412	0.2283	2.08172	-1.02072	-0.641494	7.269	5.18728	-1.02072	-0.641494	0.1023	0.1332	0	0	0	0	0	0	0	0	0	0	0	0	0	0	0	0	0	0	0	0	0	0	0	0	0	0	0	0
690	1476	TonB-dependent receptor	PA14_RS17730;PA14_43650	PA1613;-	PA14_RS17730;PA14_43650	false	false	52	52	1	1	1	0	0	0	5.26735	NaN	0	0	0	0	1	1	1	1	1	1	1	1	1	1	1	1	1	1	1	1	1	1	1	1	1	1	1	1	1	1	1	1
691	1478	tape measure domain-containing protein	-	-	Q009_RS27580;Q009_04047	false	true	6	6	0.203093	0.804904	0.506603	-0.69429	0.692306	0.295332	4.65317	5.34746	0.692306	0.295332	0.2089	0.2655	0	0	1	0	0	0	0	0	0	1	0	0	0	0	0	0	0	0	0	0	0	1	0	1	0	1	0	0
692	1480	hypothetical protein	-	-	NS00_RS21205;-	false	false	3	3	0.291347	0.721969	0.483131	-1.00429	0.535589	0.315935	4.321	5.32529	0.535589	0.315935	0.2797	0.2476	0	0	0	0	0	0	0	0	0	0	0	0	0	0	0	1	0	0	0	1	0	0	0	0	0	0	0	0
693	1482	fatty acid oxidation complex subunit alpha	PA14_RS10170;PA14_25080	PA3014;-	PA14_RS10170;PA14_25080	false	false	52	52	1	1	1	0	0	0	5.26735	NaN	0	0	0	0	1	1	1	1	1	1	1	1	1	1	1	1	1	1	1	1	1	1	1	1	1	1	1	1	1	1	1	1
694	1484	hypothetical protein	-	-	NT88_RS20255;-	false	false	5	5	0.711826	0.298858	0.600532	0.593745	-0.524535	-0.221464	5.804	5.21026	-0.524535	-0.221464	0.2928	0.2934	0	0	0	0	0	0	0	1	0	0	0	0	0	0	0	0	1	0	0	0	0	0	0	0	0	0	0	0
695	1488	zinc-binding dehydrogenase	PA14_RS09485;PA14_23420	-	PA14_RS09485;PA14_23420	false	false	15	15	0.129005	0.875197	0.391655	-0.630577	0.889393	0.407096	4.81867	5.44924	0.889393	0.407096	0.1256	0.1979	0	0	0	1	1	1	1	1	0	0	0	1	0	0	1	0	1	0	0	0	0	0	1	0	0	0	0	0
696	1489	methyl-accepting chemotaxis protein	PA14_RS12150;PA14_29760	PA2654;-	PA14_RS12150;PA14_29760	false	false	52	52	1	1	1	0	0	0	5.26735	NaN	0	0	0	0	1	1	1	1	1	1	1	1	1	1	1	1	1	1	1	1	1	1	1	1	1	1	1	1	1	1	1	1
697	1490	3-hydroxyacyl-CoA dehydrogenase	PA14_RS17075;PA14_42080	PA1737;-	PA14_RS17075;PA14_42080	false	false	52	52	1	1	1	0	0	0	5.26735	NaN	0	0	0	0	1	1	1	1	1	1	1	1	1	1	1	1	1	1	1	1	1	1	1	1	1	1	1	1	1	1	1	1
698	1491	ATP-dependent DNA helicase DinG	PA14_RS20650;PA14_50840	PA1045;-	PA14_RS20650;PA14_50840	false	false	52	52	1	1	1	0	0	0	5.26735	NaN	0	0	0	0	1	1	1	1	1	1	1	1	1	1	1	1	1	1	1	1	1	1	1	1	1	1	1	1	1	1	1	1
699	1492	fimbrial protein	PA14_RS27185;PA14_66620	PA5040;-	PA14_RS27185;PA14_66620	false	false	51	51	0.605082	0.420782	0.789046	0.651882	-0.375943	-0.102898	5.27988	4.628	-0.375943	-0.102898	0.4142	0.431	1	1	1	1	1	1	1	1	1	1	1	1	1	1	1	1	1	1	1	1	1	1	0	1	1	1	1	1
700	1493	hypothetical protein	-	-	NT88_RS30045;-	false	false	7	7	0.44668	0.5639	0.925645	-0.0915238	0.350003	0.0335557	5.18814	5.27967	0.350003	0.0335557	0.4363	0.4719	0	0	0	0	0	0	1	1	0	0	0	0	0	0	0	0	1	0	0	0	0	0	1	0	0	0	0	0
701	1495	methyl-accepting chemotaxis protein	-	-	L683_RS62355;L683_25100	false	false	1	1	0.0626977	0.945106	0.203929	-3.07141	1.20275	0.690521	2.255	5.32641	1.20275	0.690521	0.0322	0.0355	0	0	1	0	0	0	0	0	0	0	0	0	0	0	0	0	0	0	0	0	0	0	0	0	0	0	0	0
702	1497	copper oxidase	PA14_RS15370;PA14_37790	PA2065;-	PA14_RS15370;PA14_37790	false	false	50	47	0.389983	0.621873	0.582816	-0.622732	0.408955	0.234469	5.20747	5.8302	0.408955	0.234469	0.386	0.2885	1	1	0	1	1	1	1	1	1	1	1	2	1	1	1	1	1	1	0	1	1	1	1	0	1	1	1	1
703	1499	hypothetical protein	PA14_RS11210;PA14_27675	-	PA14_RS11210;PA14_27675	false	false	39	39	0.00195935	0.998168	0.00715936	-2.00518	2.70789	2.14513	4.76605	6.77123	2.70789	2.14513	0.0012	0.0035	1	1	1	1	1	1	1	1	0	1	1	1	1	1	1	1	1	1	1	1	1	1	1	1	0	1	1	1
704	1500	hypothetical protein	-	-	NR50_RS27095;-	false	false	1	1	0.655343	0.369508	0.829501	0.524745	-0.432376	-0.0811833	5.782	5.25725	-0.432376	-0.0811833	0.3748	0.3808	0	0	0	0	0	0	0	0	0	0	0	0	0	0	0	0	0	0	0	0	0	0	0	0	0	0	0	0
705	1502	TonB-dependent receptor	PA14_RS26150;PA14_63960	PA4837;-	PA14_RS26150;PA14_63960	false	false	52	52	1	1	1	0	0	0	5.26735	NaN	0	0	0	0	1	1	1	1	1	1	1	1	1	1	1	1	1	1	1	1	1	1	1	1	1	1	1	1	1	1	1	1
706	1504	ATP-dependent DNA helicase RecQ	PA14_RS08365;PA14_20810	PA3344;-	PA14_RS08365;PA14_20810	false	false	52	52	1	1	1	0	0	0	5.26735	NaN	0	0	0	0	1	1	1	1	1	1	1	1	1	1	1	1	1	1	1	1	1	1	1	1	1	1	1	1	1	1	1	1
707	1505	methyl-accepting chemotaxis protein	PA14_RS25040;PA14_61300	PA4633;-	PA14_RS25040;PA14_61300	false	false	52	52	1	1	1	0	0	0	5.26735	NaN	0	0	0	0	1	1	1	1	1	1	1	1	1	1	1	1	1	1	1	1	1	1	1	1	1	1	1	1	1	1	1	1
708	1507	ATPase	-	-	NT47_RS17400;-	false	false	1	1	0.703	0.320458	0.734059	0.827569	-0.494228	-0.134269	6.079	5.25143	-0.494228	-0.134269	0.34	0.349	0	0	0	0	0	0	0	0	0	0	0	0	0	0	0	0	0	0	0	0	0	0	0	0	0	0	0	0
709	1510	TonB-dependent receptor	PA14_RS14240;PA14_34990	PA2289;-	PA14_RS14240;PA14_34990	false	false	49	49	0.376771	0.638038	0.701771	-0.549347	0.423923	0.153805	5.23565	5.785	0.423923	0.153805	0.3582	0.3329	1	1	1	1	1	1	1	1	1	1	1	1	1	1	1	1	0	1	1	1	0	1	1	1	1	1	1	1
710	1511	hypothetical protein	-	PA1372;-	PA1372;-	false	false	1	1	0.806811	0.211979	0.629571	1.17424	-0.673707	-0.200955	6.419	5.24476	-0.673707	-0.200955	0.2572	0.263	0	0	0	0	0	0	0	0	0	0	0	0	0	0	0	0	0	0	0	0	0	0	0	0	0	0	0	0
711	1512	hypothetical protein	-	-	Q009_RS21070;Q009_02694	false	false	2	2	0.275988	0.739689	0.51229	-1.13812	0.55911	0.290484	4.173	5.31112	0.55911	0.290484	0.2729	0.2782	0	0	0	0	0	0	0	0	0	0	0	0	0	0	0	0	0	1	0	0	0	1	0	0	0	0	0	0
712	1513	primosomal protein N'	-	-	NQ81_RS01790;-	false	false	1	1	0.320458	0.703	0.566684	-1.39416	0.494228	0.246659	3.9	5.29416	0.494228	0.246659	0.3477	0.3494	0	0	0	0	0	0	0	0	0	0	0	0	0	0	0	0	0	0	1	0	0	0	0	0	0	0	0	0
713	1515	pyocin-S2	-	PA1150;-	PA1150;-	false	false	14	14	0.561482	0.446663	0.740644	0.249654	-0.35002	-0.13039	5.44979	5.20013	-0.35002	-0.13039	0.4369	0.3658	0	1	1	0	1	0	0	0	0	0	1	0	0	1	0	0	0	0	1	0	0	0	0	0	0	0	0	1
714	1522	tail-specific protease	PA14_RS08835;PA14_21880	PA3257;-	PA14_RS08835;PA14_21880	false	false	52	52	1	1	1	0	0	0	5.26735	NaN	0	0	0	0	1	1	1	1	1	1	1	1	1	1	1	1	1	1	1	1	1	1	1	1	1	1	1	1	1	1	1	1
715	1523	chemotaxis protein	-	-	L683_RS44920;L683_09045	false	false	1	1	0.0626977	0.945106	0.203929	-3.07141	1.20275	0.690521	2.255	5.32641	1.20275	0.690521	0.0322	0.0355	0	0	1	0	0	0	0	0	0	0	0	0	0	0	0	0	0	0	0	0	0	0	0	0	0	0	0	0
716	1524	protein BifA	PA14_RS23145;PA14_56790	PA4367;-	PA14_RS23145;PA14_56790	false	false	51	51	0.679542	0.344657	0.628769	1.17698	-0.462613	-0.201509	5.28998	4.113	-0.462613	-0.201509	0.3642	0.3804	1	1	1	1	1	1	1	1	1	1	1	1	1	1	1	1	1	1	1	0	1	1	1	1	1	1	1	1
717	1526	flagellar biosynthesis protein FlhA	PA14_RS18545;PA14_45680	PA1452;-	PA14_RS18545;PA14_45680	false	false	52	52	1	1	1	0	0	0	5.26735	NaN	0	0	0	0	1	1	1	1	1	1	1	1	1	1	1	1	1	1	1	1	1	1	1	1	1	1	1	1	1	1	1	1
718	1529	catalase HPII	PA14_RS14980;PA14_36810	PA2147;-	PA14_RS14980;PA14_36810	false	false	51	51	0.747394	0.27436	0.463851	1.78059	-0.561679	-0.333622	5.30159	3.521	-0.561679	-0.333622	0.3131	0.3295	1	1	1	1	1	1	1	1	1	1	1	1	1	1	1	1	0	1	1	1	1	1	1	1	1	1	1	1
719	1534	type III secretory apparatus protein PcrD	PA14_RS17250;PA14_42500	PA1703;-	PA14_RS17250;PA14_42500	false	false	50	50	0.0269801	0.975851	0.0238699	-3.83308	1.56896	1.62215	5.11992	8.953	1.56896	1.62215	0.0207	0.0207	1	1	1	1	1	1	1	1	1	1	1	1	1	1	1	1	1	1	1	1	1	1	1	1	1	1	1	1
720	1536	restriction endonuclease subunit M	-	-	NT80_RS29780;-	false	false	3	3	0.347357	0.667025	0.831946	-0.304585	0.459225	0.0799051	4.98033	5.28492	0.459225	0.0799051	0.3414	0.4366	0	0	1	0	0	0	0	0	0	0	0	0	0	0	0	0	0	0	1	0	0	0	0	0	0	0	0	0
721	1538	bacteriophage protein	PA14_RS03230;PA14_08050	PA0620;-	PA14_RS03230;PA14_08050	false	false	34	34	0.987482	0.0131548	0.0595487	1.30223	-1.88092	-1.22513	5.71812	4.41589	-1.88092	-1.22513	0.0122	0.0293	1	0	0	1	0	0	0	0	1	1	0	1	1	0	0	1	0	1	0	1	1	1	0	1	0	1	1	1
722	1540	DNA methyltransferase	-	-	Q000_RS19990;Q000_02708	false	true	6	6	0.585045	0.426154	0.794789	0.27242	-0.370434	-0.0997484	5.50833	5.23591	-0.370434	-0.0997484	0.4175	0.3849	0	0	0	0	0	0	0	1	0	0	1	0	0	0	0	0	1	0	0	0	0	0	0	0	0	0	0	0
723	1541	iron ABC transporter substrate-binding protein	PA14_RS04120;PA14_10200	PA4156;-	PA14_RS04120;PA14_10200	false	false	50	50	0.017109	0.984809	0.0103836	-4.31668	1.76677	1.98365	5.10132	9.418	1.76677	1.98365	0.0079	0.0089	1	1	1	1	1	1	1	1	1	1	1	1	1	1	1	1	1	1	1	1	1	1	1	1	1	1	1	1
724	1549	peptidase S14	-	-	ACP77_RS05610;-	false	false	7	7	0.752908	0.255635	0.313724	0.982978	-0.592379	-0.503452	6.118	5.13502	-0.592379	-0.503452	0.2534	0.1572	0	0	1	0	0	0	0	0	0	1	0	0	0	0	0	0	0	0	0	1	0	0	0	0	0	0	0	0
725	1550	phosphate acetyltransferase	PA14_RS21765;PA14_53480	PA0835;-	PA14_RS21765;PA14_53480	false	false	52	52	1	1	1	0	0	0	5.26735	NaN	0	0	0	0	1	1	1	1	1	1	1	1	1	1	1	1	1	1	1	1	1	1	1	1	1	1	1	1	1	1	1	1
726	1552	ATPase	-	-	PABE173_RS29765;PABE173_5499	false	false	1	1	0.193189	0.824547	0.384173	-2.11298	0.714017	0.415473	3.195	5.30798	0.714017	0.415473	0.2293	0.2301	0	0	0	0	0	0	0	0	0	0	0	0	1	0	0	0	0	0	0	0	0	0	0	0	0	0	0	0
727	1560	dehydrogenase	PA14_RS07465;PA14_18640	PA3534;-	PA14_RS07465;PA14_18640	false	false	51	51	0.945106	0.0626977	0.203929	3.07141	-1.20275	-0.690521	5.32641	2.255	-1.20275	-0.690521	0.0322	0.0469	1	1	0	1	1	1	1	1	1	1	1	1	1	1	1	1	1	1	1	1	1	1	1	1	1	1	1	1
728	1562	polyribonucleotide nucleotidyltransferase	PA14_RS25630;PA14_62710	PA4740;-	PA14_RS25630;PA14_62710	false	false	51	51	0.128664	0.884806	0.205412	-3.06153	0.890542	0.687374	5.20847	8.27	0.890542	0.687374	0.1536	0.1582	1	1	1	1	1	1	1	1	1	1	1	1	1	1	1	1	1	1	1	1	1	1	1	1	1	1	1	1
729	1563	guanosine-3',5'-bis(diphosphate) 3'-pyrophosphohydrolase	PA14_RS28700;PA14_70470	PA5338;-	PA5338;-	false	false	52	52	1	1	1	0	0	0	5.26735	NaN	0	0	0	0	1	1	1	1	1	1	1	1	1	1	1	1	1	1	1	1	1	1	1	1	1	1	1	1	1	1	1	1
730	1566	PAS domain-containing sensor histidine kinase	PA14_RS23305;PA14_57170	PA4398;-	PA14_RS23305;PA14_57170	false	false	52	52	1	1	1	0	0	0	5.26735	NaN	0	0	0	0	1	1	1	1	1	1	1	1	1	1	1	1	1	1	1	1	1	1	1	1	1	1	1	1	1	1	1	1
731	1568	membrane protein	PA14_RS17320;PA14_42670	PA1689;-	PA14_RS17320;PA14_42670	false	false	52	52	1	1	1	0	0	0	5.26735	NaN	0	0	0	0	1	1	1	1	1	1	1	1	1	1	1	1	1	1	1	1	1	1	1	1	1	1	1	1	1	1	1	1
732	1569	site-specific recombinase	-	-	NT41_RS28525;-	false	false	2	2	0.674383	0.342935	0.843124	0.3444	-0.464788	-0.0741083	5.5985	5.2541	-0.464788	-0.0741083	0.3372	0.4197	0	0	0	0	0	0	0	0	0	0	0	0	0	0	0	0	0	0	0	0	0	0	0	0	0	1	0	0
733	1573	hypothetical protein	-	-	JF43_RS30240;JF43_30605	false	false	1	1	0.768203	0.252606	0.684151	0.990706	-0.597556	-0.164848	6.239	5.24829	-0.597556	-0.164848	0.2907	0.2932	0	0	0	0	0	0	0	0	0	0	0	0	0	0	0	0	0	0	0	0	0	0	0	0	0	0	0	0
734	1576	ATP-dependent Lon protease	-	-	NT47_RS17415;-	false	false	2	2	0.739689	0.275988	0.691707	0.68968	-0.55911	-0.160078	5.9305	5.24082	-0.55911	-0.160078	0.2645	0.3294	0	0	0	0	0	0	0	0	0	0	0	0	0	0	0	0	0	0	0	0	0	0	0	0	0	0	0	0
735	1578	hybrid sensor histidine kinase/response regulator	PA14_RS14825;PA14_36420	PA2177;-	PA14_RS14825;PA14_36420	false	false	49	49	0.608237	0.406918	0.683169	0.585456	-0.390493	-0.165472	5.30112	4.71567	-0.390493	-0.165472	0.4101	0.368	1	1	1	1	1	1	1	1	1	1	1	1	1	1	1	1	0	1	1	1	1	1	1	1	0	1	1	1
736	1579	hypothetical protein	-	-	PABE173_RS29730;PABE173_5492	false	false	1	1	0.193189	0.824547	0.384173	-2.11298	0.714017	0.415473	3.195	5.30798	0.714017	0.415473	0.2293	0.2301	0	0	0	0	0	0	0	0	0	0	0	0	1	0	0	0	0	0	0	0	0	0	0	0	0	0	0	0
737	1581	hypothetical protein	-	-	NS33_RS23925;-	false	false	1	1	0.0808686	0.92866	0.237777	-2.85729	1.09222	0.62383	2.465	5.32229	1.09222	0.62383	0.0784	0.0811	0	0	0	0	1	0	0	0	0	0	0	0	0	0	0	0	0	0	0	0	0	0	0	0	0	0	0	0
738	1582	hypothetical protein	-	-	PA103_RS02890;PA103_0561	false	false	2	2	0.639409	0.378548	0.867752	0.2898	-0.421879	-0.0616045	5.546	5.2562	-0.421879	-0.0616045	0.3577	0.4162	0	0	0	0	0	0	0	0	0	0	0	0	0	0	0	0	0	0	0	0	0	0	0	0	0	0	0	1
739	1591	hypothetical protein	-	-	Q009_RS18420;Q009_02152	false	false	2	2	0.275988	0.739689	0.51229	-1.13812	0.55911	0.290484	4.173	5.31112	0.55911	0.290484	0.2729	0.2782	0	0	0	0	0	0	0	0	0	0	0	0	0	0	0	0	0	1	0	0	0	1	0	0	0	0	0	0
740	1592	acyl-CoA synthetase	PA14_RS26870;PA14_65810	PA4978;-	PA14_RS26870;PA14_65810	false	false	49	49	0.376771	0.638038	0.624182	-0.702517	0.423923	0.204689	5.22682	5.92933	0.423923	0.204689	0.3644	0.3006	1	1	1	1	1	1	1	1	1	1	1	0	1	1	1	1	1	1	1	1	1	1	1	1	1	1	0	1
741	1595	5-oxoprolinase	-	-	NT56_RS17015;-	false	false	1	1	0.115194	0.897242	0.278294	-2.62686	0.93857	0.555496	2.691	5.31786	0.93857	0.555496	0.131	0.1396	0	0	0	0	0	0	0	1	0	0	0	0	0	0	0	0	0	0	0	0	0	0	0	0	0	0	0	0
742	1601	hypothetical protein	-	-	PACIG1_RS31925;PACIG1_5865	false	false	1	1	0.369508	0.655343	0.715611	-0.887412	0.432376	0.145323	4.397	5.28441	0.432376	0.145323	0.3769	0.3771	0	0	0	0	0	0	0	0	0	0	0	0	0	0	0	0	0	0	0	0	1	0	0	0	0	0	0	0
743	1602	transcriptional antiterminator	-	-	NR50_RS21010;-	false	false	1	1	0.655343	0.369508	0.829501	0.524745	-0.432376	-0.0811833	5.782	5.25725	-0.432376	-0.0811833	0.3748	0.3808	0	0	0	0	0	0	0	0	0	0	0	0	0	0	0	0	0	0	0	0	0	0	0	0	0	0	0	0
744	1603	hypothetical protein	-	-	P998_RS35275;P998_05841	false	true	3	3	0.915222	0.0910383	0.255696	1.62118	-1.04078	-0.592276	6.795	5.17382	-1.04078	-0.592276	0.0917	0.1371	0	0	0	0	0	0	0	0	0	0	0	0	0	0	0	0	0	0	0	0	0	0	0	0	0	0	0	0
745	1605	chromosome partitioning protein ParB	PA14_RS12765;PA14_31190	-	PA14_RS12765;PA14_31190	false	false	23	18	0.803986	0.201378	0.568399	0.400686	-0.695989	-0.245347	5.52933	5.12865	-0.695989	-0.245347	0.2037	0.2922	0	0	0	1	0	0	0	0	0	0	0	1	1	0	0	0	0	1	1	0	0	4	0	3	0	1	0	1
746	1606	non-hemolytic phospholipase C	PA14_RS08490;PA14_21110	PA3319;-	PA14_RS08490;PA14_21110	false	false	52	52	1	1	1	0	0	0	5.26735	NaN	0	0	0	0	1	1	1	1	1	1	1	1	1	1	1	1	1	1	1	1	1	1	1	1	1	1	1	1	1	1	1	1
747	1608	hypothetical protein	-	-	Q009_RS17835;Q009_02023	false	false	1	1	0.394918	0.630492	0.755716	-0.757922	0.403493	0.121641	4.524	5.28192	0.403493	0.121641	0.4021	0.4067	0	0	0	0	0	0	0	0	0	0	0	0	0	0	0	0	0	0	0	0	0	1	0	0	0	0	0	0
748	1617	carbon starvation protein A	PA14_RS24895;PA14_60950	PA4606;-	PA14_RS24895;PA14_60950	false	false	51	51	0.0808686	0.92866	0.103292	-3.918	1.09222	0.985933	5.192	9.11	1.09222	0.985933	0.0776	0.0809	1	1	1	1	1	1	1	1	1	1	1	1	1	1	1	1	1	1	1	1	1	1	1	1	1	1	1	1
749	1619	protein FimX	PA14_RS26775;PA14_65540	PA4959;-	PA14_RS26775;PA14_65540	false	false	52	52	1	1	1	0	0	0	5.26735	NaN	0	0	0	0	1	1	1	1	1	1	1	1	1	1	1	1	1	1	1	1	1	1	1	1	1	1	1	1	1	1	1	1
750	1620	ATP-dependent DNA helicase RecG	PA14_RS28735;PA14_70570	PA5345;-	PA14_RS28735;PA14_70570	false	false	52	52	1	1	1	0	0	0	5.26735	NaN	0	0	0	0	1	1	1	1	1	1	1	1	1	1	1	1	1	1	1	1	1	1	1	1	1	1	1	1	1	1	1	1
751	1621	type IV secretion protein Rhs	-	-	Y880_RS19000;-	false	false	6	6	0.808829	0.19907	0.278658	1.12835	-0.700994	-0.554929	6.2655	5.13715	-0.700994	-0.554929	0.2029	0.1473	0	1	0	0	0	0	0	0	0	0	0	0	0	1	0	0	0	0	0	0	0	0	0	0	0	0	0	0
752	1623	hypothetical protein	-	-	NS42_RS26280;-	false	false	2	2	0.912474	0.0953412	0.2283	2.08172	-1.02072	-0.641494	7.269	5.18728	-1.02072	-0.641494	0.1023	0.1332	0	0	0	0	0	0	0	0	0	0	0	0	0	0	0	0	0	0	0	0	0	0	0	0	0	0	0	0
753	1626	transposase	-	-	PACI27_RS02400;PACI27_0458	false	true	5	5	0.913996	0.0909808	0.18259	1.49987	-1.04105	-0.738524	6.623	5.12313	-1.04105	-0.738524	0.0847	0.0948	0	0	0	0	0	0	0	0	0	0	0	0	0	0	0	0	0	1	0	0	0	0	0	0	0	0	0	0
754	1629	hypothetical protein	PA14_RS26365;PA14_64510	PA4879;-	PA14_RS26365;PA14_64510	false	false	51	51	0.841216	0.175453	0.370223	2.17518	-0.75584	-0.431536	5.30918	3.134	-0.75584	-0.431536	0.21	0.2256	1	1	1	1	1	1	1	1	1	1	1	0	1	1	1	1	1	1	1	1	1	1	1	1	1	1	1	1
755	1632	potassium-transporting ATPase subunit B	-	PA1634;-	PA1634;-	false	false	50	50	0.509491	0.509491	0.732534	-0.59452	-0.292864	0.135172	5.24448	5.839	-0.292864	0.135172	0.4811	0.3701	1	1	1	0	1	1	1	1	1	1	1	1	1	1	1	1	1	1	1	1	1	1	1	1	1	1	1	1
756	1634	AIPR family protein	-	-	Q012_RS15370;Q012_01630	false	false	2	2	0.566136	0.452653	0.979668	0.04436	-0.344234	-0.00892107	5.31	5.26564	-0.344234	-0.00892107	0.4348	0.4774	0	0	0	0	0	0	0	0	0	0	0	0	0	0	0	0	0	0	0	0	0	0	0	0	0	1	0	0
757	1635	hypothetical protein	-	-	NQ81_RS01995;-	false	false	1	1	0.320458	0.703	0.566684	-1.39416	0.494228	0.246659	3.9	5.29416	0.494228	0.246659	0.3477	0.3494	0	0	0	0	0	0	0	0	0	0	0	0	0	0	0	0	0	0	1	0	0	0	0	0	0	0	0	0
758	1640	hypothetical protein	PA14_RS06480;PA14_16180	PA3729;-	PA14_RS06480;PA14_16180	false	false	52	52	1	1	1	0	0	0	5.26735	NaN	0	0	0	0	1	1	1	1	1	1	1	1	1	1	1	1	1	1	1	1	1	1	1	1	1	1	1	1	1	1	1	1
759	1641	ATP-dependent endonuclease	-	-	NT47_RS06265;-	false	false	1	1	0.703	0.320458	0.734059	0.827569	-0.494228	-0.134269	6.079	5.25143	-0.494228	-0.134269	0.34	0.349	0	0	0	0	0	0	0	0	0	0	0	0	0	0	0	0	0	0	0	0	0	0	0	0	0	0	0	0
760	1642	integrase	-	-	PA103_RS06140;PA103_1197	false	false	3	3	0.681166	0.332975	0.828115	0.311633	-0.477589	-0.0819092	5.561	5.24937	-0.477589	-0.0819092	0.3168	0.3942	0	0	0	0	0	0	0	0	0	0	0	0	0	0	0	0	0	0	0	0	0	0	0	0	0	0	0	1
761	1645	chromosome segregation protein SMC	-	-	NT81_RS18980;-	false	false	1	1	0.945106	0.0626977	0.0763877	4.25141	-1.20275	-1.11698	9.437	5.18559	-1.20275	-1.11698	0.0371	0.0372	0	0	0	0	0	0	0	0	0	0	0	0	0	0	0	0	0	0	0	0	0	0	0	0	0	0	0	0
762	1647	DEAD/DEAH box helicase	PA14_RS06240;PA14_15590	-	PA14_RS06240;PA14_15590	false	false	7	7	0.467947	0.542702	0.815689	-0.22854	0.329803	0.0884754	5.06957	5.29811	0.329803	0.0884754	0.4604	0.4142	0	0	0	1	0	0	0	0	0	0	0	1	0	0	0	0	0	1	0	0	0	0	0	0	0	0	0	0
763	1648	protein kinase	PA14_RS13175;PA14_32300	PA2502;-	PA14_RS13175;PA14_32300	false	false	103	52	1	1	1	0	0	0	5.26735	NaN	0	0	0	0	2	2	2	2	2	2	2	2	2	2	2	2	2	2	2	2	2	2	2	2	2	2	2	2	2	2	2	2
764	1650	membrane protein	PA14_RS17130;PA14_42220	PA1727;-	PA14_RS17130;PA14_42220	false	false	51	51	0.553007	0.473438	0.922567	0.236902	-0.324737	-0.035002	5.2719	5.035	-0.324737	-0.035002	0.463	0.4761	1	1	1	1	1	1	1	1	1	1	1	1	1	1	1	1	1	1	1	1	1	1	1	1	0	1	1	1
765	1651	exosortase	PA14_RS20960;PA14_51530	-	PA14_RS20960;PA14_51530	false	false	11	11	0.0330805	0.968539	0.0516895	-1.56471	1.48043	1.2866	4.03364	5.59834	1.48043	1.2866	0.0327	0.0231	1	0	0	1	0	0	0	0	0	0	0	1	1	0	0	0	0	1	0	1	0	1	0	1	0	0	0	1
766	1652	TonB-dependent receptor	PA14_RS22055;PA14_54180	PA0781;-	PA14_RS22055;PA14_54180	false	false	51	51	0.320458	0.703	0.734059	-0.827569	0.494228	0.134269	5.25143	6.079	0.494228	0.134269	0.34	0.3433	1	1	1	1	1	1	1	1	1	1	1	1	1	1	1	1	1	1	1	1	1	1	1	1	1	1	1	1
767	1656	hypothetical protein	-	-	JF43_RS28465;-	false	false	1	1	0.768203	0.252606	0.684151	0.990706	-0.597556	-0.164848	6.239	5.24829	-0.597556	-0.164848	0.2907	0.2932	0	0	0	0	0	0	0	0	0	0	0	0	0	0	0	0	0	0	0	0	0	0	0	0	0	0	0	0
768	1660	Tfp pilus assembly protein FimV	PA14_RS08385;PA14_20860	PA3340;-	PA14_RS08385;PA14_20860	false	false	48	48	0.172489	0.83614	0.388396	-1.07944	0.763238	0.410725	5.18431	6.26375	0.763238	0.410725	0.17	0.1941	1	1	1	1	1	1	1	1	1	1	1	1	1	1	1	1	1	1	1	0	1	1	1	1	1	1	1	0
769	1665	dimethylglycine catabolism protein DgcA	PA14_RS29025;PA14_71260	PA5398;-	PA14_RS29025;PA14_71260	false	false	52	52	1	1	1	0	0	0	5.26735	NaN	0	0	0	0	1	1	1	1	1	1	1	1	1	1	1	1	1	1	1	1	1	1	1	1	1	1	1	1	1	1	1	1
770	1666	hypothetical protein	-	-	Q011_RS34125;Q011_05451	false	false	1	1	0.297	0.72564	0.544685	-1.47369	0.527244	0.263855	3.822	5.29569	0.527244	0.263855	0.3254	0.3299	0	0	0	0	0	0	0	0	0	0	0	0	0	0	0	0	0	1	0	0	0	0	0	0	0	0	0	0
771	1668	fusaric acid resistance protein	PA14_RS19425;PA14_47810	PA1270;-	PA14_RS19425;PA14_47810	false	false	46	46	0.111746	0.893607	0.167815	-1.4313	0.951769	0.77517	5.1022	6.5335	0.951769	0.77517	0.1115	0.0893	1	1	1	1	1	1	0	1	1	1	1	1	1	1	1	1	1	1	1	1	1	1	1	1	1	1	1	0
772	1669	AraC family transcriptional regulator	PA14_RS20025;PA14_49300	PA1169;-	PA14_RS20025;PA14_49300	false	false	50	50	0.0953412	0.912474	0.2283	-2.08172	1.02072	0.641494	5.18728	7.269	1.02072	0.641494	0.1023	0.1328	1	1	1	1	1	1	1	1	1	1	1	1	1	1	1	1	1	1	1	1	1	1	1	1	1	1	1	1
773	1671	hypothetical protein	-	-	P998_RS25615;P998_03878	false	false	2	2	0.317094	0.699661	0.557969	-1.018	0.498812	0.25339	4.2885	5.3065	0.498812	0.25339	0.3135	0.3034	0	0	0	0	0	0	0	0	1	0	0	0	0	0	0	0	0	0	0	0	0	0	0	0	0	0	0	0
774	1673	glycine--tRNA ligase subunit beta	PA14_RS00040;PA14_00090	PA0008;-	PA14_RS00040;PA14_00090	false	false	53	52	1	1	1	0	0	0	5.26735	NaN	0	0	0	0	1	1	1	1	1	1	1	1	1	1	1	1	1	1	1	1	1	1	1	1	1	1	1	1	1	1	1	1
775	1674	4-alpha-glucanotransferase	PA14_RS14895;PA14_36590	PA2163;-	PA14_RS14895;PA14_36590	false	false	51	51	0.747394	0.27436	0.463851	1.78059	-0.561679	-0.333622	5.30159	3.521	-0.561679	-0.333622	0.3131	0.3295	1	1	1	1	1	1	1	1	1	1	1	1	1	1	1	1	0	1	1	1	1	1	1	1	1	1	1	1
776	1676	hypothetical protein	-	-	NS72_RS01265;-	false	false	1	1	0.897242	0.115194	0.170482	3.30929	-0.93857	-0.768321	8.513	5.20371	-0.93857	-0.768321	0.1357	0.137	0	0	0	0	0	0	0	0	0	0	0	0	0	0	0	0	0	0	0	0	0	0	0	0	0	0	0	0
777	1677	conjugal transfer protein TraG	PA14_RS12650;PA14_30960	-	PA14_RS12650;PA14_30960	false	false	26	21	0.760741	0.245085	0.616515	0.341214	-0.610683	-0.210057	5.47076	5.12955	-0.610683	-0.210057	0.2512	0.3179	0	0	0	1	0	0	0	1	0	0	0	1	1	0	0	0	0	1	1	0	1	4	0	3	0	1	0	1
778	1682	2,4-dienoyl-CoA reductase	PA14_RS26030;PA14_63640	PA4814;-	PA4814;-	false	false	51	51	0.655343	0.369508	0.715611	0.887412	-0.432376	-0.145323	5.28441	4.397	-0.432376	-0.145323	0.3769	0.3919	1	1	1	1	1	1	1	1	1	1	1	1	1	1	1	1	1	1	1	1	0	1	1	1	1	1	1	1
779	1683	terminase	-	-	NS42_RS13355;-	false	true	5	5	0.976516	0.0252592	0.0684033	2.03492	-1.59758	-1.16492	7.1066	5.07168	-1.59758	-1.16492	0.0201	0.0378	0	0	0	0	0	0	0	0	0	0	0	0	0	0	0	0	0	0	0	0	0	0	0	0	0	0	0	0
780	1684	peptidase S9	PA14_RS19255;PA14_47360	PA1304;-	PA14_RS19255;PA14_47360	false	false	51	51	0.806811	0.211979	0.393487	2.0722	-0.673707	-0.40507	5.3072	3.235	-0.673707	-0.40507	0.2502	0.2645	1	1	1	1	1	1	1	1	1	1	1	1	1	0	1	1	1	1	1	1	1	1	1	1	1	1	1	1
781	1685	flagellar hook-associated protein FlgK	PA14_RS20440;PA14_50360	PA1086;-	PA14_RS20440;PA14_50360	false	false	52	52	1	1	1	0	0	0	5.26735	NaN	0	0	0	0	1	1	1	1	1	1	1	1	1	1	1	1	1	1	1	1	1	1	1	1	1	1	1	1	1	1	1	1
782	1687	integrase	-	-	NT47_RS31185;-	false	false	1	1	0.703	0.320458	0.734059	0.827569	-0.494228	-0.134269	6.079	5.25143	-0.494228	-0.134269	0.34	0.349	0	0	0	0	0	0	0	0	0	0	0	0	0	0	0	0	0	0	0	0	0	0	0	0	0	0	0	0
783	1688	type VI secretion protein	PA14_RS12705;PA14_31070	-	PA14_RS12705;PA14_31070	false	false	26	18	0.617201	0.390159	0.756659	0.217922	-0.408758	-0.1211	5.40983	5.19191	-0.408758	-0.1211	0.3958	0.3921	0	0	0	1	0	0	0	1	0	0	0	1	1	0	0	0	0	1	1	0	0	7	0	3	0	1	0	1
784	1689	chemotaxis protein	PA14_RS02180;PA14_05360	PA0411;-	PA14_RS02180;PA14_05360	false	false	52	52	1	1	1	0	0	0	5.26735	NaN	0	0	0	0	1	1	1	1	1	1	1	1	1	1	1	1	1	1	1	1	1	1	1	1	1	1	1	1	1	1	1	1
785	1690	integrase	-	-	NT47_RS10415;-	false	false	3	3	0.5	0.515653	0.887315	-0.203415	0.30103	0.0519224	5.07567	5.27908	0.30103	0.0519224	0.4909	0.4736	0	0	0	0	0	0	0	0	0	0	0	0	0	0	0	0	0	0	0	1	0	0	0	0	1	0	0	0
786	1691	peptidase	-	-	NT88_RS29540;-	false	false	5	5	0.711826	0.298858	0.600532	0.593745	-0.524535	-0.221464	5.804	5.21026	-0.524535	-0.221464	0.2928	0.2934	0	0	0	0	0	0	0	1	0	0	0	0	0	0	0	0	1	0	0	0	0	0	0	0	0	0	0	0
787	1692	hypothetical protein	PA14_RS19620;PA14_48340	PA1232;-	PA14_RS19620;PA14_48340	false	false	51	51	0.07134	0.937302	0.0796457	-4.20655	1.14667	1.09884	5.18645	9.393	1.14667	1.09884	0.0581	0.0631	1	1	1	1	1	1	1	1	1	1	1	1	1	1	1	1	1	1	1	1	1	1	1	1	1	1	1	1
788	1694	acyl-CoA dehydrogenase	PA14_RS27940;PA14_68510	-	PA14_RS27940;PA14_68510	false	false	1	1	0.07134	0.937302	0.208544	-3.04082	1.14667	0.680802	2.285	5.32582	1.14667	0.680802	0.0594	0.0629	0	0	0	1	0	0	0	0	0	0	0	0	0	0	0	0	0	0	0	0	0	0	0	0	0	0	0	0
789	1697	oligopeptidase A	PA14_RS00340;PA14_00790	PA0067;-	PA14_RS00340;PA14_00790	false	false	52	52	1	1	1	0	0	0	5.26735	NaN	0	0	0	0	1	1	1	1	1	1	1	1	1	1	1	1	1	1	1	1	1	1	1	1	1	1	1	1	1	1	1	1
790	1701	2,4-dienoyl-CoA reductase	PA14_RS09785;PA14_24170	PA3092;-	PA3092;-	false	false	51	51	0.102758	0.908672	0.143718	-3.52545	0.988183	0.84249	5.19955	8.725	0.988183	0.84249	0.1152	0.1196	1	1	1	1	1	1	1	1	1	1	1	1	1	1	1	1	1	1	1	1	1	1	1	1	1	1	1	1
791	1702	DeoR family transcriptional regulator	PA14_RS26615;PA14_65090	PA4929;-	PA14_RS26615;PA14_65090	false	false	52	52	1	1	1	0	0	0	5.26735	NaN	0	0	0	0	1	1	1	1	1	1	1	1	1	1	1	1	1	1	1	1	1	1	1	1	1	1	1	1	1	1	1	1
792	1705	DNA topoisomerase III	-	-	ACP77_RS12195;-	false	true	33	24	0.955239	0.0465204	0.121124	1.02829	-1.33236	-0.916769	5.82104	4.79275	-1.33236	-0.916769	0.044	0.0612	0	1	3	0	0	0	0	1	0	0	0	0	1	0	0	0	0	2	1	0	1	0	0	1	0	2	0	1
793	1707	methionine--tRNA ligase	PA14_RS07635;PA14_19050	PA3482;-	PA14_RS07635;PA14_19050	false	false	51	51	0.841216	0.175453	0.370223	2.17518	-0.75584	-0.431536	5.30918	3.134	-0.75584	-0.431536	0.21	0.2256	1	1	1	1	1	1	1	1	1	1	1	0	1	1	1	1	1	1	1	1	1	1	1	1	1	1	1	1
794	1710	transglutaminase	PA14_RS10895;PA14_26930	PA2873;-	PA14_RS10895;PA14_26930	false	false	52	52	1	1	1	0	0	0	5.26735	NaN	0	0	0	0	1	1	1	1	1	1	1	1	1	1	1	1	1	1	1	1	1	1	1	1	1	1	1	1	1	1	1	1
795	1711	potassium-transporting ATPase subunit B	-	-	L683_RS42825;L683_08295	false	false	1	1	0.0626977	0.945106	0.203929	-3.07141	1.20275	0.690521	2.255	5.32641	1.20275	0.690521	0.0322	0.0355	0	0	1	0	0	0	0	0	0	0	0	0	0	0	0	0	0	0	0	0	0	0	0	0	0	0	0	0
796	1712	oligopeptide transporter, OPT family	PA14_RS05225;PA14_12980	PA3934;-	PA3934;-	false	false	51	51	0.605082	0.420782	0.789046	0.651882	-0.375943	-0.102898	5.27988	4.628	-0.375943	-0.102898	0.4142	0.431	1	1	1	1	1	1	1	1	1	1	1	1	1	1	1	1	1	1	1	1	1	1	0	1	1	1	1	1
797	1713	multidrug transporter	-	-	Q009_RS26510;Q009_03814	false	false	5	5	0.610017	0.401942	0.897609	0.146102	-0.395837	-0.046913	5.3994	5.2533	-0.395837	-0.046913	0.399	0.4434	0	0	0	0	0	0	0	0	0	0	0	0	0	0	0	0	0	1	0	1	0	1	0	0	0	0	0	0
798	1714	hypothetical protein	-	-	Q009_RS38305;Q009_06270	false	false	2	2	0.275988	0.739689	0.51229	-1.13812	0.55911	0.290484	4.173	5.31112	0.55911	0.290484	0.2729	0.2782	0	0	0	0	0	0	0	0	0	0	0	0	0	0	0	0	0	1	0	0	0	1	0	0	0	0	0	0
799	1715	sigma-54-dependent Fis family transcriptional regulator	PA14_RS04785;PA14_11830	PA4021;-	PA14_RS04785;PA14_11830	false	false	51	51	0.07134	0.937302	0.0796457	-4.20655	1.14667	1.09884	5.18645	9.393	1.14667	1.09884	0.0581	0.0631	1	1	1	1	1	1	1	1	1	1	1	1	1	1	1	1	1	1	1	1	1	1	1	1	1	1	1	1
800	1716	diguanylate cyclase	PA14_RS20260;PA14_49890	PA1120;-	PA14_RS20260;PA14_49890	false	false	51	51	0.158784	0.85681	0.407391	-2.01235	0.799192	0.389988	5.22865	7.241	0.799192	0.389988	0.1913	0.1946	1	1	1	1	1	1	1	1	1	1	1	1	1	1	1	1	1	1	1	1	1	1	1	1	1	1	1	1
801	1717	anaerobic ribonucleoside triphosphate reductase	PA14_RS16080;PA14_39690	PA1920;-	PA14_RS16080;PA14_39690	false	false	52	52	1	1	1	0	0	0	5.26735	NaN	0	0	0	0	1	1	1	1	1	1	1	1	1	1	1	1	1	1	1	1	1	1	1	1	1	1	1	1	1	1	1	1
802	1722	C4-dicarboxylate ABC transporter	PA14_RS29765;PA14_73110	PA5544;-	PA14_RS29765;PA14_73110	false	false	52	52	1	1	1	0	0	0	5.26735	NaN	0	0	0	0	1	1	1	1	1	1	1	1	1	1	1	1	1	1	1	1	1	1	1	1	1	1	1	1	1	1	1	1
803	1723	imidazolonepropionase	PA14_RS27440;PA14_67250	PA5092;-	PA14_RS27440;PA14_67250	false	false	39	39	0.0518442	0.950361	0.188271	-1.00826	1.2853	0.725217	5.01528	6.02354	1.2853	0.725217	0.0481	0.0922	1	1	1	1	1	1	1	1	0	0	1	1	1	1	1	0	1	1	1	1	1	1	1	1	1	1	0	1
804	1731	phage tail protein	-	-	NR77_RS14865;-	false	false	1	1	0.72564	0.297	0.726497	0.852039	-0.527244	-0.138766	6.103	5.25096	-0.527244	-0.138766	0.3225	0.3241	0	0	0	0	0	0	0	0	0	0	0	0	0	0	0	0	0	0	0	0	0	0	0	0	0	0	0	0
805	1735	diguanylate cyclase	PA14_RS29480;PA14_72420	PA5487;-	PA14_RS29480;PA14_72420	false	false	52	52	1	1	1	0	0	0	5.26735	NaN	0	0	0	0	1	1	1	1	1	1	1	1	1	1	1	1	1	1	1	1	1	1	1	1	1	1	1	1	1	1	1	1
806	1736	cytochrome c	PA14_RS24710;PA14_60490	PA4571;-	PA14_RS24710;PA14_60490	false	false	52	52	1	1	1	0	0	0	5.26735	NaN	0	0	0	0	1	1	1	1	1	1	1	1	1	1	1	1	1	1	1	1	1	1	1	1	1	1	1	1	1	1	1	1
807	1739	DNA topoisomerase I	-	-	NS12_RS28270;-	false	false	1	1	0.211979	0.806811	0.393487	-2.0722	0.673707	0.40507	3.235	5.3072	0.673707	0.40507	0.2502	0.2516	0	0	0	0	0	0	0	0	0	0	0	0	0	1	0	0	0	0	0	0	0	0	0	0	0	0	0	0
808	1744	hypothetical protein	-	-	NS72_RS01350;-	false	false	1	1	0.897242	0.115194	0.170482	3.30929	-0.93857	-0.768321	8.513	5.20371	-0.93857	-0.768321	0.1357	0.137	0	0	0	0	0	0	0	0	0	0	0	0	0	0	0	0	0	0	0	0	0	0	0	0	0	0	0	0
809	1745	hypothetical protein	-	-	P998_RS0106265;-	false	false	1	1	0.679542	0.344657	0.80835	0.59102	-0.462613	-0.0924004	5.847	5.25598	-0.462613	-0.0924004	0.3711	0.3733	0	0	0	0	0	0	0	0	0	0	0	0	0	0	0	0	0	0	0	0	0	0	0	0	0	0	0	0
810	1746	terminase	-	-	NT56_RS27615;-	false	true	10	10	0.699311	0.308819	0.697166	0.330267	-0.510296	-0.156664	5.5341	5.20383	-0.510296	-0.156664	0.3078	0.3483	0	0	0	0	1	0	0	1	0	0	0	0	0	0	0	1	0	0	0	0	0	0	1	0	1	0	0	0
811	1747	hypothetical protein	-	-	NS42_RS25800;-	false	false	2	2	0.912474	0.0953412	0.2283	2.08172	-1.02072	-0.641494	7.269	5.18728	-1.02072	-0.641494	0.1023	0.1332	0	0	0	0	0	0	0	0	0	0	0	0	0	0	0	0	0	0	0	0	0	0	0	0	0	0	0	0
812	1748	helicase	PA14_RS24165;PA14_59210	-	PA14_RS24165;PA14_59210	false	true	31	30	0.555242	0.452086	0.917346	-0.0703091	-0.344779	0.0374666	5.2376	5.30791	-0.344779	0.0374666	0.4508	0.45	0	1	1	1	0	0	0	0	1	1	0	1	1	0	0	1	0	1	1	1	1	0	0	0	1	0	1	1
813	1751	type IV secretion protein Rhs	PA14_RS13850;PA14_33960	PA2373;-	PA14_RS13850;PA14_33960	true	false	49	49	0.872472	0.135904	0.244712	1.65871	-0.866767	-0.611345	5.36304	3.70433	-0.866767	-0.611345	0.1345	0.1209	1	1	1	1	1	1	1	1	1	1	1	1	0	1	1	1	0	1	1	1	0	1	1	1	1	1	1	1
814	1752	phosphatase	PA14_RS12245;PA14_30040	PA2635;-	PA14_RS12245;PA14_30040	false	false	52	52	1	1	1	0	0	0	5.26735	NaN	0	0	0	0	1	1	1	1	1	1	1	1	1	1	1	1	1	1	1	1	1	1	1	1	1	1	1	1	1	1	1	1
815	1753	SAM-dependent methyltransferase	-	-	Q000_RS27360;Q000_04222	false	false	5	5	0.0291479	0.972855	0.0525469	-2.16004	1.53539	1.27945	3.315	5.47504	1.53539	1.27945	0.0261	0.0193	0	1	0	0	0	0	0	0	0	0	1	0	1	0	0	1	0	0	0	0	0	0	0	0	0	0	0	0
816	1754	DNA topoisomerase I	-	-	NT49_RS27925;-	false	false	1	1	0.27436	0.747394	0.463851	-1.78059	0.561679	0.333622	3.521	5.30159	0.561679	0.333622	0.3131	0.3252	0	0	0	0	0	0	0	0	0	0	0	0	0	0	0	0	1	0	0	0	0	0	0	0	0	0	0	0
817	1756	copper resistance protein A	-	-	Y880_RS10745;-	false	false	6	4	0.666133	0.346451	0.480424	0.884167	-0.460358	-0.318375	6.0835	5.19933	-0.460358	-0.318375	0.3429	0.2377	0	0	2	0	0	0	0	0	0	0	0	0	0	0	0	0	0	0	1	0	0	0	0	0	0	0	0	0
818	1758	excinuclease ABC subunit B	PA14_RS09520;PA14_23510	PA3138;-	PA14_RS09520;PA14_23510	false	false	52	52	1	1	1	0	0	0	5.26735	NaN	0	0	0	0	1	1	1	1	1	1	1	1	1	1	1	1	1	1	1	1	1	1	1	1	1	1	1	1	1	1	1	1
819	1759	flagellar biosynthesis protein FlgM	PA14_RS21715;PA14_53340	PA0845;-	PA14_RS21715;PA14_53340	false	false	52	52	1	1	1	0	0	0	5.26735	NaN	0	0	0	0	1	1	1	1	1	1	1	1	1	1	1	1	1	1	1	1	1	1	1	1	1	1	1	1	1	1	1	1
820	1760	DNA primase	PA14_RS03015;PA14_07530	PA0577;-	PA14_RS03015;PA14_07530	false	false	52	52	1	1	1	0	0	0	5.26735	NaN	0	0	0	0	1	1	1	1	1	1	1	1	1	1	1	1	1	1	1	1	1	1	1	1	1	1	1	1	1	1	1	1
821	1764	fusaric acid resistance protein	-	-	NS72_RS18625;-	false	false	1	1	0.897242	0.115194	0.170482	3.30929	-0.93857	-0.768321	8.513	5.20371	-0.93857	-0.768321	0.1357	0.137	0	0	0	0	0	0	0	0	0	0	0	0	0	0	0	0	0	0	0	0	0	0	0	0	0	0	0	0
822	1769	DNA sulfur modification protein DndD	-	-	NS33_RS29175;-	false	false	1	1	0.0808686	0.92866	0.237777	-2.85729	1.09222	0.62383	2.465	5.32229	1.09222	0.62383	0.0784	0.0811	0	0	0	0	1	0	0	0	0	0	0	0	0	0	0	0	0	0	0	0	0	0	0	0	0	0	0	0
823	1774	ATP-dependent DNA helicase Rep	PA14_RS28495;PA14_69910	PA5296;-	PA14_RS28495;PA14_69910	false	false	52	52	1	1	1	0	0	0	5.26735	NaN	0	0	0	0	1	1	1	1	1	1	1	1	1	1	1	1	1	1	1	1	1	1	1	1	1	1	1	1	1	1	1	1
824	1776	membrane protein	PA14_RS09500;PA14_23470	PA3141;-	PA14_RS09500;PA14_23470	false	false	51	51	0.128664	0.884806	0.205412	-3.06153	0.890542	0.687374	5.20847	8.27	0.890542	0.687374	0.1536	0.1582	1	1	1	1	1	1	1	1	1	1	1	1	1	1	1	1	1	1	1	1	1	1	1	1	1	1	1	1
825	1780	choline transporter	PA14_RS28470;PA14_69850	PA5291;-	PA14_RS28470;PA14_69850	false	false	51	51	0.703	0.320458	0.566684	1.39416	-0.494228	-0.246659	5.29416	3.9	-0.494228	-0.246659	0.3477	0.363	1	1	1	1	1	1	1	1	1	1	1	1	1	1	1	1	1	1	0	1	1	1	1	1	1	1	1	1
826	1783	hypothetical protein	-	-	NT42_RS12545;-	false	true	4	4	0.780141	0.230157	0.630328	0.603854	-0.637975	-0.200434	5.82475	5.2209	-0.637975	-0.200434	0.2262	0.3101	1	0	0	0	0	0	0	0	0	0	0	0	0	0	0	0	0	0	0	0	0	0	0	0	0	0	0	0
827	1784	hypothetical protein	-	-	Q009_RS12000;Q009_00827	false	false	9	9	0.659538	0.349373	0.940816	0.0656899	-0.456711	-0.0264951	5.32167	5.25598	-0.456711	-0.0264951	0.3454	0.4674	0	0	0	0	0	0	0	0	0	0	0	0	0	0	0	1	0	1	0	1	0	1	0	1	0	0	0	1
828	1789	DNA helicase UvrD	-	-	NT81_RS18975;-	false	false	1	1	0.945106	0.0626977	0.0763877	4.25141	-1.20275	-1.11698	9.437	5.18559	-1.20275	-1.11698	0.0371	0.0372	0	0	0	0	0	0	0	0	0	0	0	0	0	0	0	0	0	0	0	0	0	0	0	0	0	0	0	0
829	1790	hypothetical protein	-	-	NT56_RS30930;-	false	true	1	1	0.115194	0.897242	0.278294	-2.62686	0.93857	0.555496	2.691	5.31786	0.93857	0.555496	0.131	0.1396	0	0	0	0	0	0	0	1	0	0	0	0	0	0	0	0	0	0	0	0	0	0	0	0	0	0	0	0
830	1793	membrane protein	PA14_RS13485;PA14_33070	PA2439;-	PA14_RS13485;PA14_33070	false	true	49	49	0.0496392	0.954257	0.0630541	-2.62263	1.30418	1.20029	5.11604	7.73867	1.30418	1.20029	0.047	0.0405	1	1	1	1	1	1	1	1	1	1	1	1	1	1	1	1	1	1	1	1	1	1	1	1	1	1	1	0
831	1794	hypothetical protein	PA14_RS15450;PA14_38000	PA2049;-	PA14_RS15450;PA14_38000	false	false	53	52	1	1	1	0	0	0	5.26735	NaN	0	0	0	0	1	1	1	2	1	1	1	1	1	1	1	1	1	1	1	1	1	1	1	1	1	1	1	1	1	1	1	1
832	1796	phosphonate C-P lyase system protein PhnL	PA14_RS08180;PA14_20420	PA3375;-	PA14_RS08180;PA14_20420	false	false	104	52	1	1	1	0	0	0	5.26735	NaN	0	0	0	0	2	2	2	2	2	2	2	2	2	2	2	2	2	2	2	2	2	2	2	2	2	2	2	2	2	2	2	2
833	1798	DNA methyltransferase	-	-	P998_RS33860;P998_05552	false	false	1	1	0.679542	0.344657	0.80835	0.59102	-0.462613	-0.0924004	5.847	5.25598	-0.462613	-0.0924004	0.3711	0.3733	0	0	0	0	0	0	0	0	0	0	0	0	0	0	0	0	0	0	0	0	0	0	0	0	0	0	0	0
834	1799	choline transporter	PA14_RS05230;PA14_12990	PA3933;-	PA14_RS05230;PA14_12990	false	false	31	31	0.0958651	0.90727	0.219481	-0.831339	1.01834	0.658604	4.93161	5.76295	1.01834	0.658604	0.0943	0.1103	1	1	1	1	1	0	0	0	1	1	1	0	1	0	1	1	0	1	1	1	1	1	0	0	0	1	1	1
835	1800	hypothetical protein	-	-	NR77_RS17695;-	false	false	1	1	0.72564	0.297	0.726497	0.852039	-0.527244	-0.138766	6.103	5.25096	-0.527244	-0.138766	0.3225	0.3241	0	0	0	0	0	0	0	0	0	0	0	0	0	0	0	0	0	0	0	0	0	0	0	0	0	0	0	0
836	1802	bifunctional UDP-glucuronic acid oxidase/UDP-4-amino-4-deoxy-L-arabinose formyltransferase	PA14_RS07365;PA14_18350	PA3554;-	PA14_RS07365;PA14_18350	false	false	51	51	0.115194	0.897242	0.170482	-3.30929	0.93857	0.768321	5.20371	8.513	0.93857	0.768321	0.1357	0.1393	1	1	1	1	1	1	1	1	1	1	1	1	1	1	1	1	1	1	1	1	1	1	1	1	1	1	1	1
837	1803	3-methylcrotonyl-CoA carboxylase subunit alpha	PA14_RS10805;PA14_26670	PA2891;-	PA14_RS10805;PA14_26670	false	false	51	51	0.07134	0.937302	0.0796457	-4.20655	1.14667	1.09884	5.18645	9.393	1.14667	1.09884	0.0581	0.0631	1	1	1	1	1	1	1	1	1	1	1	1	1	1	1	1	1	1	1	1	1	1	1	1	1	1	1	1
838	1805	histidine kinase	PA14_RS00880;PA14_02150	PA0172;-	PA14_RS00880;PA14_02150	false	false	50	50	0.0334766	0.969917	0.0389696	-3.51744	1.47526	1.40927	5.13206	8.6495	1.47526	1.40927	0.0259	0.0266	1	1	1	1	1	1	1	1	1	1	1	1	1	1	1	1	1	1	1	1	1	1	1	1	1	1	1	1
839	1806	alpha-1,4-glucan--maltose-1-phosphate maltosyltransferase	PA14_RS14955;PA14_36740	PA2151;-	PA2151;-	false	false	51	51	0.747394	0.27436	0.463851	1.78059	-0.561679	-0.333622	5.30159	3.521	-0.561679	-0.333622	0.3131	0.3295	1	1	1	1	1	1	1	1	1	1	1	1	1	1	1	1	0	1	1	1	1	1	1	1	1	1	1	1
840	1807	fusaric acid resistance protein	PA14_RS08565;PA14_21280	PA3305;-	PA14_RS08565;PA14_21280	false	false	51	51	0.252606	0.768203	0.684151	-0.990706	0.597556	0.164848	5.24829	6.239	0.597556	0.164848	0.2907	0.2944	1	1	1	1	1	1	1	1	1	1	1	1	1	1	1	1	1	1	1	1	1	1	1	1	1	1	1	1
841	1809	hypothetical protein	-	-	Q006_RS16910;Q006_02159	false	false	1	1	0.85681	0.158784	0.407391	2.01235	-0.799192	-0.389988	7.241	5.22865	-0.799192	-0.389988	0.1913	0.1918	0	0	0	0	0	0	0	0	0	0	0	0	0	0	0	0	0	0	0	0	0	0	0	0	0	0	0	0
842	1813	metal-transporting ATPase	PA14_RS13505;PA14_33130	PA2435;-	PA14_RS13505;PA14_33130	false	false	53	52	1	1	1	0	0	0	5.26735	NaN	0	0	0	0	1	1	1	1	1	1	1	1	1	1	1	1	1	1	1	1	1	1	1	1	1	1	1	1	1	1	1	1
843	1815	macrolide ABC transporter permease/ATP-binding protein MacB	PA14_RS13765;PA14_33760	PA2390;-	PA14_RS13765;PA14_33760	false	false	52	52	1	1	1	0	0	0	5.26735	NaN	0	0	0	0	1	1	1	1	1	1	1	1	1	1	1	1	1	1	1	1	1	1	1	1	1	1	1	1	1	1	1	1
844	1816	DNA helicase	PA14_RS24405;PA14_59830	-	PA14_RS24405;PA14_59830	false	false	32	31	0.577625	0.429687	0.934887	-0.0557327	-0.366848	0.0292408	5.24484	5.30057	-0.366848	0.0292408	0.4343	0.4598	1	1	1	1	0	0	0	0	1	0	0	1	1	0	0	0	0	1	1	1	1	1	0	1	1	0	1	1
845	1817	biofilm formation protein PslA	-	PA2231;-	PA2231;-	false	false	78	50	0.490509	0.528451	0.722646	-0.6174	0.309353	0.141075	5.2436	5.861	0.309353	0.141075	0.4688	0.3476	2	2	2	0	2	2	2	2	1	2	2	1	1	2	2	2	2	2	2	1	1	2	1	2	2	1	2	1
846	1819	terminase	-	-	ACP77_RS05595;-	false	true	8	8	0.619569	0.390128	0.535674	0.573511	-0.408793	-0.2711	5.75263	5.17911	-0.408793	-0.2711	0.3828	0.2623	0	0	1	0	0	0	0	0	0	1	0	0	1	0	0	0	0	0	0	1	0	0	0	0	0	0	0	0
847	1821	copper resistance protein CopA	-	-	ACP77_RS11715;-	false	false	10	10	0.333763	0.674641	0.675147	-0.355638	0.476562	0.170602	4.9801	5.33574	0.476562	0.170602	0.3236	0.3406	0	0	0	0	0	0	0	1	0	0	0	0	1	0	0	0	0	1	1	0	1	0	0	1	0	0	0	1
848	1822	biofilm formation protein PslE	PA14_RS14510;PA14_35690	PA2235;-	PA14_RS14510;PA14_35690	false	false	51	51	0.0626977	0.945106	0.0763877	-4.25141	1.20275	1.11698	5.18559	9.437	1.20275	1.11698	0.0371	0.042	1	1	1	1	1	1	1	1	1	1	1	1	1	1	1	1	1	1	1	1	1	1	1	1	1	1	1	1
849	1823	acyltransferase	PA14_RS28195;PA14_69170	PA5238;-	PA14_RS28195;PA14_69170	false	false	51	51	0.788021	0.231797	0.421969	1.95086	-0.634892	-0.374719	5.30486	3.354	-0.634892	-0.374719	0.2749	0.2833	1	1	1	1	1	1	1	1	1	1	1	1	1	1	0	1	1	1	1	1	1	1	1	1	1	1	1	1
850	1824	c-type cytochrome biogenesis protein CcmF	PA14_RS18410;PA14_45310	PA1480;-	PA14_RS18410;PA14_45310	false	false	54	52	1	1	1	0	0	0	5.26735	NaN	0	0	0	0	1	1	2	1	1	1	1	1	1	1	1	1	1	1	1	1	1	1	1	1	1	1	1	1	1	1	1	1
851	1827	DNA methyltransferase	-	-	NR39_RS08980;-	false	false	2	2	0.754893	0.260311	0.720628	0.62208	-0.584507	-0.142289	5.8655	5.24342	-0.584507	-0.142289	0.2526	0.3475	0	0	0	0	0	0	0	0	0	0	0	0	0	0	0	0	0	0	0	0	0	0	0	0	0	1	0	0
852	1830	restriction endonuclease subunit M	-	-	NT41_RS28545;-	false	false	2	2	0.674383	0.342935	0.843124	0.3444	-0.464788	-0.0741083	5.5985	5.2541	-0.464788	-0.0741083	0.3372	0.4197	0	0	0	0	0	0	0	0	0	0	0	0	0	0	0	0	0	0	0	0	0	0	0	0	0	1	0	0
853	1833	hypothetical protein	-	-	NT38_RS06945;-	false	false	1	1	0.9584	0.0478789	0.024915	5.33016	-1.31986	-1.60354	10.495	5.16484	-1.31986	-1.60354	0	0.0007	0	0	0	0	0	0	0	0	0	0	0	0	0	0	0	0	0	0	0	0	0	0	0	0	0	0	0	0
854	1834	hypothetical protein	-	-	PABE177_RS12635;-	false	true	1	1	0.344657	0.679542	0.628769	-1.17698	0.462613	0.201509	4.113	5.28998	0.462613	0.201509	0.3642	0.366	0	0	0	0	0	0	0	0	0	0	0	0	0	0	0	0	0	0	0	1	0	0	0	0	0	0	0	0
855	1838	cytochrome ubiquinol oxidase subunit I	-	-	Y880_RS02440;-	false	false	1	1	0.937302	0.07134	0.0796457	4.20655	-1.14667	-1.09884	9.393	5.18645	-1.14667	-1.09884	0.0581	0.0638	0	0	0	0	0	0	0	0	0	0	0	0	0	0	0	0	0	0	0	0	0	0	0	0	0	0	0	0
856	1840	amidohydrolase	PA14_RS11915;PA14_29230	PA2699;-	PA14_RS11915;PA14_29230	false	false	51	51	0.102758	0.908672	0.143718	-3.52545	0.988183	0.84249	5.19955	8.725	0.988183	0.84249	0.1152	0.1196	1	1	1	1	1	1	1	1	1	1	1	1	1	1	1	1	1	1	1	1	1	1	1	1	1	1	1	1
857	1843	hypothetical protein	-	-	NS42_RS26205;-	false	false	2	2	0.912474	0.0953412	0.2283	2.08172	-1.02072	-0.641494	7.269	5.18728	-1.02072	-0.641494	0.1023	0.1332	0	0	0	0	0	0	0	0	0	0	0	0	0	0	0	0	0	0	0	0	0	0	0	0	0	0	0	0
858	1844	type II secretion system protein GspD	PA14_RS09705;PA14_23970	PA3105;-	PA14_RS09705;PA14_23970	false	false	49	49	0.836745	0.173117	0.327829	1.398	-0.761662	-0.484353	5.348	3.95	-0.761662	-0.484353	0.1711	0.1727	1	1	0	1	1	1	1	1	1	1	1	0	1	1	1	1	1	1	1	1	1	1	1	1	1	1	1	1
859	1845	dimethylglycine catabolism protein DgcB	PA14_RS29030;PA14_71280	PA5399;-	PA14_RS29030;PA14_71280	false	false	52	52	1	1	1	0	0	0	5.26735	NaN	0	0	0	0	1	1	1	1	1	1	1	1	1	1	1	1	1	1	1	1	1	1	1	1	1	1	1	1	1	1	1	1
860	1847	cytochrome ubiquinol oxidase subunit I	PA14_RS19185;PA14_47190	PA1318;-	PA14_RS19185;PA14_47190	false	false	53	52	1	1	1	0	0	0	5.26735	NaN	0	0	0	0	1	1	1	1	1	1	1	1	1	1	1	1	1	1	1	1	1	1	1	1	1	1	1	1	1	1	1	1
861	1848	SDS hydrolase SdsA1	PA14_RS22265;PA14_54700	PA0740;-	PA14_RS22265;PA14_54700	false	false	52	52	1	1	1	0	0	0	5.26735	NaN	0	0	0	0	1	1	1	1	1	1	1	1	1	1	1	1	1	1	1	1	1	1	1	1	1	1	1	1	1	1	1	1
862	1849	excinuclease ABC subunit B	-	-	Q002_RS15130;Q002_01720	false	false	8	8	0.961023	0.0411649	0.190691	1.20357	-1.38547	-0.71967	6.28575	5.08218	-1.38547	-0.71967	0.0392	0.1007	0	1	0	0	0	0	0	0	0	0	0	0	0	0	0	0	0	0	0	0	0	0	0	0	0	0	0	0
863	1851	integrating conjugative element relaxase PFGI-1 class	PA14_RS21010;PA14_51640	-	PA14_RS21010;PA14_51640	false	false	43	36	0.440895	0.566916	0.688092	-0.290917	0.355665	0.162354	5.17783	5.46875	0.355665	0.162354	0.4296	0.336	1	1	1	2	0	0	0	0	1	1	1	2	1	0	0	1	0	3	1	1	1	1	0	1	1	0	1	1
864	1852	hypothetical protein	-	-	Y880_RS01590;-	false	false	3	3	0.562372	0.453137	0.770588	0.418463	-0.343771	-0.113178	5.66167	5.2432	-0.343771	-0.113178	0.4453	0.3802	0	0	0	0	0	0	0	0	0	0	0	0	1	0	0	0	0	0	0	0	1	0	0	0	0	0	0	0
865	1855	3-methylcrotonyl-CoA carboxylase subunit alpha	PA14_RS15640;PA14_38480	PA2012;-	PA14_RS15640;PA14_38480	false	false	46	46	0.68175	0.328537	0.534673	0.649261	-0.483415	-0.271912	5.34226	4.693	-0.483415	-0.271912	0.3268	0.2815	1	1	1	1	1	1	1	1	1	1	1	1	0	1	1	1	1	1	1	0	0	1	1	1	1	0	1	1
866	1856	methyl-accepting chemotaxis protein	PA14_RS26185;PA14_64060	PA4844;-	PA14_RS26185;PA14_64060	false	false	49	49	0.864096	0.144649	0.311411	1.44576	-0.839683	-0.506666	5.35076	3.905	-0.839683	-0.506666	0.1411	0.1625	1	1	1	1	1	0	1	1	1	1	1	1	1	1	1	1	1	1	1	0	1	1	1	1	1	0	1	1
867	1859	sulfate permease	PA14_RS00145;PA14_00340	PA0029;-	PA14_RS00145;PA14_00340	false	false	104	52	1	1	1	0	0	0	5.26735	NaN	0	0	0	0	2	2	2	2	2	2	2	2	2	2	2	2	2	2	2	2	2	2	2	2	2	2	2	2	2	2	2	1
868	1861	protease	PA14_RS19140;PA14_47090	PA1327;-	PA14_RS19140;PA14_47090	false	false	52	52	1	1	1	0	0	0	5.26735	NaN	0	0	0	0	1	1	1	1	1	1	1	1	1	1	1	1	1	1	1	1	1	1	1	1	1	1	1	1	1	1	1	1
869	1863	hybrid sensor histidine kinase/response regulator	PA14_RS17740;PA14_43670	PA1611;-	PA14_RS17740;PA14_43670	false	false	52	51	0.193189	0.824547	0.6171	-1.21706	0.714017	0.209644	5.24394	6.461	0.714017	0.209644	0.2347	0.2389	1	1	1	1	1	1	1	1	1	1	1	1	1	1	1	1	1	1	1	1	1	1	1	1	1	1	1	1
870	1865	bifunctional tRNA (5-methylaminomethyl-2-thiouridylate)-methyltransferase MnmD/FAD-dependent cmnm(5)s(2)U34 oxidoreductase MnmC	PA14_RS07765;PA14_19400	PA3456;-	PA14_RS07765;PA14_19400	false	false	47	47	0.331939	0.679252	0.676914	-0.472706	0.478942	0.169466	5.22189	5.6946	0.478942	0.169466	0.3218	0.328	1	1	1	1	1	1	1	1	1	1	1	0	1	1	1	1	1	1	1	1	0	1	1	1	1	1	1	0
871	1866	GTPase	PA14_RS02075;PA14_05110	PA0391;-	PA14_RS02075;PA14_05110	false	false	51	51	0.473438	0.553007	0.985764	-0.0434902	0.324737	0.00622704	5.26651	5.31	0.324737	0.00622704	0.4568	0.4613	1	1	1	1	1	1	1	1	1	1	1	1	1	1	1	1	1	1	1	1	1	1	1	1	1	1	1	0
872	1867	hypothetical protein	-	-	NR40_RS22300;-	false	false	3	3	0.970207	0.0325482	0.132567	2.13482	-1.48747	-0.877564	7.279	5.14418	-1.48747	-0.877564	0.0268	0.0765	0	0	0	0	0	0	0	0	0	0	0	0	0	0	0	0	0	0	0	0	0	0	0	0	0	0	0	0
873	1869	hypothetical protein	-	-	NR39_RS08915;-	false	false	1	1	0.841216	0.175453	0.56205	1.41078	-0.75584	-0.250225	6.651	5.24022	-0.75584	-0.250225	0.2068	0.2079	0	0	0	0	0	0	0	0	0	0	0	0	0	0	0	0	0	0	0	0	0	0	0	0	0	0	0	0
874	1870	chemotaxis protein	PA14_RS17560;PA14_43220	PA1646;-	PA14_RS17560;PA14_43220	false	false	48	47	0.298858	0.711826	0.684075	-0.461643	0.524535	0.164896	5.22296	5.6846	0.524535	0.164896	0.2946	0.3312	1	1	1	1	1	1	1	1	1	1	1	1	0	1	1	1	1	1	1	1	0	1	1	1	1	1	2	1
875	1873	hypothetical protein	PA14_RS29365;PA14_72110	PA5464;-	PA14_RS29365;PA14_72110	false	false	52	52	1	1	1	0	0	0	5.26735	NaN	0	0	0	0	1	1	1	1	1	1	1	1	1	1	1	1	1	1	1	1	1	1	1	1	1	1	1	1	1	1	1	1
876	1874	N5,N10-methylene tetrahydromethanopterin reductase	PA14_RS13980;PA14_34290	PA2348;-	PA2348;-	false	false	47	47	0.487619	0.524751	0.77603	-0.322902	0.31192	0.110121	5.2363	5.5592	0.31192	0.110121	0.4733	0.372	1	1	0	1	1	1	1	1	1	1	1	1	1	1	1	1	0	1	1	1	0	1	1	1	1	1	1	1
877	1875	glycine/betaine transmethylase	PA14_RS09835;PA14_24290	PA3082;-	PA14_RS09835;PA14_24290	false	false	52	52	1	1	1	0	0	0	5.26735	NaN	0	0	0	0	1	1	1	1	1	1	1	1	1	1	1	1	1	1	1	1	1	1	1	1	1	1	1	1	1	1	1	1
878	1877	phage tail protein	-	-	NR50_RS01425;-	false	false	2	2	0.904659	0.103658	0.189155	2.2658	-0.984396	-0.723182	7.446	5.1802	-0.984396	-0.723182	0.1058	0.1009	0	0	0	0	0	0	0	0	0	0	0	0	0	0	0	0	0	0	0	0	0	0	0	0	0	0	0	0
879	1879	helicase	-	-	NQ81_RS01525;-	false	false	1	1	0.320458	0.703	0.566684	-1.39416	0.494228	0.246659	3.9	5.29416	0.494228	0.246659	0.3477	0.3494	0	0	0	0	0	0	0	0	0	0	0	0	0	0	0	0	0	0	1	0	0	0	0	0	0	0	0	0
880	1881	propionate catabolism operon regulatory protein PrpR	PA14_RS14640;-	-	PA14_RS14640;-	false	false	39	39	0.249441	0.757219	0.544828	-0.467231	0.603033	0.26374	5.15054	5.61777	0.603033	0.26374	0.2496	0.2801	1	1	1	1	0	1	1	1	1	1	0	1	1	0	1	1	0	1	1	1	0	1	0	1	1	1	1	1
881	1885	exotoxin A	PA14_RS20120;PA14_49560	PA1148;-	PA14_RS20120;PA14_49560	false	false	49	49	0.0679315	0.937069	0.0834099	-2.44823	1.16793	1.07878	5.1261	7.57433	1.16793	1.07878	0.0641	0.048	1	1	1	1	1	1	1	1	1	1	1	1	1	1	1	1	1	1	1	1	1	1	1	0	1	1	1	1
882	1886	TonB-dependent receptor	PA14_RS16070;PA14_39650	PA1922;-	PA14_RS16070;PA14_39650	false	false	51	51	0.115194	0.897242	0.170482	-3.30929	0.93857	0.768321	5.20371	8.513	0.93857	0.768321	0.1357	0.1393	1	1	1	1	1	1	1	1	1	1	1	1	1	1	1	1	1	1	1	1	1	1	1	1	1	1	1	1
883	1887	hypothetical protein	-	-	Q009_RS26710;Q009_03871	false	false	4	4	0.702735	0.309262	0.695404	0.491458	-0.509673	-0.157763	5.721	5.22954	-0.509673	-0.157763	0.3046	0.3409	0	0	0	0	0	0	0	0	0	0	0	0	0	0	0	0	0	1	0	0	0	1	0	0	0	0	0	0
884	1891	conjugal transfer protein TrbG	-	-	NT49_RS27905;-	false	false	2	2	0.15314	0.857835	0.255858	-1.96492	0.814911	0.592001	3.378	5.34292	0.814911	0.592001	0.1653	0.1372	0	0	0	0	0	0	0	0	0	0	0	0	0	1	0	0	1	0	0	0	0	0	0	0	0	0	0	0
885	1893	helicase	PA14_RS18775;PA14_46270	PA1405;-	PA14_RS18775;PA14_46270	false	false	52	52	1	1	1	0	0	0	5.26735	NaN	0	0	0	0	1	1	1	1	1	1	1	1	1	1	1	1	1	1	1	1	1	1	1	1	1	1	1	1	1	1	1	1
886	1895	penicillin-binding protein 2	PA14_RS04875;PA14_12060	PA4003;-	PA14_RS04875;PA14_12060	false	false	52	52	1	1	1	0	0	0	5.26735	NaN	0	0	0	0	1	1	1	1	1	1	1	1	1	1	1	1	1	1	1	1	1	1	1	1	1	1	1	1	1	1	1	1
887	1899	terminase	-	-	NS42_RS31165;-	false	false	2	2	0.912474	0.0953412	0.2283	2.08172	-1.02072	-0.641494	7.269	5.18728	-1.02072	-0.641494	0.1023	0.1332	0	0	0	0	0	0	0	0	0	0	0	0	0	0	0	0	0	0	0	0	0	0	0	0	0	0	0	0
888	1900	acetoacetyl-CoA synthetase	PA14_RS15715;PA14_38690	PA1997;-	PA14_RS15715;PA14_38690	false	false	52	52	1	1	1	0	0	0	5.26735	NaN	0	0	0	0	1	1	1	1	1	1	1	1	1	1	1	1	1	1	1	1	1	1	1	1	1	1	1	1	1	1	1	1
889	1901	acetyl-coenzyme A synthetase	PA14_RS21500;PA14_52800	PA0887;-	PA14_RS21500;PA14_52800	false	false	53	52	1	1	1	0	0	0	5.26735	NaN	0	0	0	0	1	1	1	1	1	1	1	1	1	1	1	1	1	1	1	1	1	1	1	1	1	1	1	1	1	1	2	1
890	1902	hypothetical protein	-	-	PA103_RS29730;PA103_5740	false	false	2	2	0.823268	0.189347	0.360924	1.58356	-0.722742	-0.442585	6.79	5.20644	-0.722742	-0.442585	0.1945	0.19	0	0	0	0	0	0	0	0	0	0	0	0	0	0	0	0	0	0	0	0	0	0	0	0	0	0	0	1
891	1904	hypothetical protein	-	-	PABE177_RS33345;PABE177_6232	false	false	3	3	0.361962	0.652643	0.577863	-0.797701	0.441337	0.238175	4.51567	5.31337	0.441337	0.238175	0.357	0.3057	0	0	0	0	0	0	0	0	0	0	0	0	1	0	0	0	0	0	0	1	0	0	0	0	0	0	0	0
892	1905	NTPase KAP	-	-	NQ67_RS24725;-	false	false	1	1	0.92866	0.0808686	0.103292	3.918	-1.09222	-0.985933	9.11	5.192	-1.09222	-0.985933	0.0776	0.0812	0	0	0	0	0	0	0	0	0	0	0	0	0	0	0	0	0	0	0	0	0	0	0	0	0	0	0	0
893	1906	ATP-dependent endonuclease	-	-	PABE171_RS03075;PABE171_0595	false	false	1	1	0.526562	0.5	0.997882	-0.00647059	-0.30103	0.000920888	5.261	5.26747	-0.30103	0.000920888	0.4747	0.5185	0	0	0	0	0	0	0	0	0	0	0	0	0	0	0	0	0	0	0	0	0	0	0	0	0	0	1	0
894	1911	DeoR family transcriptional regulator	PA14_RS18640;PA14_45930	PA1433;-	PA14_RS18640;PA14_45930	false	false	49	49	0.239957	0.772072	0.414873	-1.16663	0.619867	0.382084	5.20004	6.36667	0.619867	0.382084	0.2366	0.208	1	1	1	1	1	1	1	1	1	1	1	1	1	1	1	1	1	1	1	1	1	1	0	1	0	1	1	1
895	1912	Fis family transcriptional regulator	-	-	NT41_RS28540;-	false	false	1	1	0.747394	0.27436	0.722097	0.866314	-0.561679	-0.141404	6.117	5.25069	-0.561679	-0.141404	0.3166	0.3183	0	0	0	0	0	0	0	0	0	0	0	0	0	0	0	0	0	0	0	0	0	0	0	0	0	0	0	0
896	1913	integrase	-	-	Y880_RS02505;-	false	false	19	18	0.782012	0.223695	0.56077	0.408588	-0.650343	-0.251216	5.5345	5.12591	-0.650343	-0.251216	0.2225	0.2821	0	1	2	0	0	0	0	1	0	0	0	0	1	0	0	0	0	1	1	0	1	0	0	1	0	0	0	0
897	1918	NTPase KAP	-	-	NS72_RS12080;-	false	false	1	1	0.897242	0.115194	0.170482	3.30929	-0.93857	-0.768321	8.513	5.20371	-0.93857	-0.768321	0.1357	0.137	0	0	0	0	0	0	0	0	0	0	0	0	0	0	0	0	0	0	0	0	0	0	0	0	0	0	0	0
898	1920	type VI secretion protein	-	-	PACIG1_RS30920;PACIG1_5882	false	false	1	1	0.369508	0.655343	0.715611	-0.887412	0.432376	0.145323	4.397	5.28441	0.432376	0.145323	0.3769	0.3771	0	0	0	0	0	0	0	0	0	0	0	0	0	0	0	0	0	0	0	0	1	0	0	0	0	0	0	0
899	1923	iron permease	-	-	NS42_RS07925;-	false	false	2	2	0.912474	0.0953412	0.2283	2.08172	-1.02072	-0.641494	7.269	5.18728	-1.02072	-0.641494	0.1023	0.1332	0	0	0	0	0	0	0	0	0	0	0	0	0	0	0	0	0	0	0	0	0	0	0	0	0	0	0	0
900	1927	oxidoreductase	PA14_RS26915;PA14_65940	PA4986;-	PA14_RS26915;PA14_65940	false	false	51	51	0.07134	0.937302	0.0796457	-4.20655	1.14667	1.09884	5.18645	9.393	1.14667	1.09884	0.0581	0.0631	1	1	1	1	1	1	1	1	1	1	1	1	1	1	1	1	1	1	1	1	1	1	1	1	1	1	1	1
901	1928	asparagine synthetase B	-	-	Q006_RS0106350;-	false	false	12	12	0.943573	0.0589354	0.109214	1.25622	-1.22962	-0.961721	6.23367	4.97745	-1.22962	-0.961721	0.0532	0.0519	0	0	0	0	0	0	0	0	0	1	0	0	1	0	0	0	0	0	0	0	1	0	0	0	0	0	1	0
902	1929	acyl-CoA synthetase	-	-	ACP77_RS00135;-	false	false	2	2	0.912474	0.0953412	0.126485	2.62876	-1.02072	-0.897959	7.795	5.16624	-1.02072	-0.897959	0.098	0.0666	0	0	0	0	0	0	0	0	0	0	0	0	0	0	0	0	0	0	0	0	0	0	0	0	0	0	0	0
903	1934	membrane protein	PA14_RS01745;PA14_04290	PA0328;-	PA14_RS01745;PA14_04290	false	false	51	51	0.553007	0.473438	0.922567	0.236902	-0.324737	-0.035002	5.2719	5.035	-0.324737	-0.035002	0.463	0.4761	1	1	1	1	1	1	1	1	1	1	1	1	1	1	1	1	1	1	1	1	1	1	1	1	0	1	1	1
904	1935	chemotaxis protein	PA14_RS27345;PA14_67010	PA5072;-	PA14_RS27345;PA14_67010	false	false	51	51	0.679542	0.344657	0.628769	1.17698	-0.462613	-0.201509	5.28998	4.113	-0.462613	-0.201509	0.3642	0.3804	1	1	1	1	1	1	1	1	1	1	1	1	1	1	1	1	1	1	1	0	1	1	1	1	1	1	1	1
905	1936	arginine decarboxylase	PA14_RS26160;PA14_63990	PA4839;-	PA14_RS26160;PA14_63990	false	false	52	52	1	1	1	0	0	0	5.26735	NaN	0	0	0	0	1	1	1	1	1	1	1	1	1	1	1	1	1	1	1	1	1	1	1	1	1	1	1	1	1	1	1	1
906	1938	hypothetical protein	-	-	NS86_RS11785;-	false	true	2	2	0.121845	0.887511	0.301256	-1.78968	0.914191	0.521064	3.5465	5.33618	0.914191	0.521064	0.1302	0.156	0	0	0	0	1	0	0	0	0	0	0	0	0	0	0	0	0	0	0	0	0	0	1	0	0	0	0	0
907	1939	type I restriction-modification system, M subunit	-	-	-	false	false	5	5	0.401942	0.610017	0.650885	-0.513302	0.395837	0.186496	4.8034	5.3167	0.395837	0.186496	0.394	0.3376	0	0	0	0	0	0	0	0	0	0	0	0	1	0	0	0	0	0	0	1	0	0	0	0	0	1	0	0
908	1940	NTPase KAP	-	-	NT81_RS26720;-	false	false	2	2	0.868265	0.142165	0.230786	2.0708	-0.847207	-0.636791	7.2585	5.1877	-0.847207	-0.636791	0.1468	0.1279	0	0	0	0	0	0	0	0	0	0	0	0	0	0	0	0	0	0	0	0	0	0	0	0	0	1	0	0
909	1942	iron ABC transporter permease	PA14_RS25335;PA14_62010	PA4688;-	PA14_RS25335;PA14_62010	false	false	52	52	1	1	1	0	0	0	5.26735	NaN	0	0	0	0	1	1	1	1	1	1	1	1	1	1	1	1	1	1	1	1	1	1	1	1	1	1	1	1	1	1	1	1
910	1943	pellicle/biofilm biosynthesis Wzx-like polysaccharide transporter PelG	PA14_RS04715;PA14_11650	PA3058;-	PA14_RS04715;PA14_11650	false	false	104	52	1	1	1	0	0	0	5.26735	NaN	0	0	0	0	2	2	2	2	2	2	2	2	2	2	2	2	2	2	2	2	2	2	2	2	2	2	2	2	2	2	2	2
911	1945	hypothetical protein	-	-	NS00_RS21215;-	false	false	1	1	0.252606	0.768203	0.451335	-1.83055	0.597556	0.345501	3.472	5.30255	0.597556	0.345501	0.2811	0.2835	0	0	0	0	0	0	0	0	0	0	0	0	0	0	0	1	0	0	0	0	0	0	0	0	0	0	0	0
912	1946	esterase	PA14_RS27540;PA14_67510	PA5112;-	PA14_RS27540;PA14_67510	false	false	52	52	1	1	1	0	0	0	5.26735	NaN	0	0	0	0	1	1	1	1	1	1	1	1	1	1	1	1	1	1	1	1	1	1	1	1	1	1	1	1	1	1	1	1
913	1947	terminase	-	-	NT56_RS24415;-	false	false	4	4	0.04144	0.961516	0.0984165	-2.0476	1.38258	1.00693	3.37725	5.42485	1.38258	1.00693	0.0397	0.0406	0	0	0	0	0	0	1	1	0	0	0	0	0	0	0	0	1	0	0	0	0	0	1	0	0	0	0	0
914	1951	alkyl sulfatase	-	-	L683_RS62210;L683_24925	false	false	1	1	0.0626977	0.945106	0.203929	-3.07141	1.20275	0.690521	2.255	5.32641	1.20275	0.690521	0.0322	0.0355	0	0	1	0	0	0	0	0	0	0	0	0	0	0	0	0	0	0	0	0	0	0	0	0	0	0	0	0
915	1953	acetyl-coenzyme A synthetase	PA14_RS25595;PA14_62630	PA4733;-	PA14_RS25595;PA14_62630	false	false	51	51	0.128664	0.884806	0.205412	-3.06153	0.890542	0.687374	5.20847	8.27	0.890542	0.687374	0.1536	0.1582	1	1	1	1	1	1	1	1	1	1	1	1	1	1	1	1	1	1	1	1	1	1	1	1	1	1	1	1
916	1955	hypothetical protein	-	-	Q006_RS17275;Q006_02239	false	false	28	28	0.881786	0.121887	0.170454	0.911726	-0.914042	-0.768394	5.68814	4.77642	-0.914042	-0.768394	0.1207	0.0845	0	0	0	0	1	1	1	1	1	1	0	0	0	0	1	1	1	0	0	0	0	0	1	1	0	1	1	1
917	1959	DNA methyltransferase	-	-	Q009_RS28450;Q009_04232	false	true	6	6	0.950214	0.0528003	0.0546484	1.97636	-1.27736	-1.26242	7.01567	5.0393	-1.27736	-1.26242	0.0497	0.0285	0	0	0	0	0	0	0	0	0	0	0	0	0	0	0	0	0	0	0	0	0	1	0	1	0	1	0	0
918	1960	acetyl-CoA hydrolase	PA14_RS28510;PA14_69950	PA5299;-	PA14_RS28510;PA14_69950	false	false	53	52	1	1	1	0	0	0	5.26735	NaN	0	0	0	0	1	1	1	1	1	1	1	1	1	1	1	1	1	1	1	1	1	1	1	2	1	1	1	1	1	1	1	1
919	1962	two-component sensor histidine kinase	-	-	NQ67_RS22050;-	false	false	1	1	0.92866	0.0808686	0.103292	3.918	-1.09222	-0.985933	9.11	5.192	-1.09222	-0.985933	0.0776	0.0812	0	0	0	0	0	0	0	0	0	0	0	0	0	0	0	0	0	0	0	0	0	0	0	0	0	0	0	0
920	1963	ABC transporter ATP-binding protein	PA14_RS10145;PA14_25020	PA3019;-	PA14_RS10145;PA14_25020	false	false	52	52	1	1	1	0	0	0	5.26735	NaN	0	0	0	0	1	1	1	1	1	1	1	1	1	1	1	1	1	1	1	1	1	1	1	1	1	1	1	1	1	1	1	1
921	1965	hypothetical protein	-	-	NS72_RS22725;-	false	false	1	1	0.897242	0.115194	0.170482	3.30929	-0.93857	-0.768321	8.513	5.20371	-0.93857	-0.768321	0.1357	0.137	0	0	0	0	0	0	0	0	0	0	0	0	0	0	0	0	0	0	0	0	0	0	0	0	0	0	0	0
922	1966	hypothetical protein	-	-	Q009_RS32175;Q009_05011	false	false	1	1	0.394918	0.630492	0.755716	-0.757922	0.403493	0.121641	4.524	5.28192	0.403493	0.121641	0.4021	0.4067	0	0	0	0	0	0	0	0	0	0	0	0	0	0	0	0	0	0	0	0	0	1	0	0	0	0	0	0
923	1970	ATPase AAA	PA14_RS24520;PA14_60080	-	PA14_RS24520;PA14_60080	false	false	4	4	0.219859	0.79017	0.393601	-1.06773	0.657856	0.404943	4.28175	5.34948	0.657856	0.404943	0.2158	0.2015	0	0	0	1	0	0	0	0	0	0	0	1	0	0	0	0	0	0	0	0	0	0	0	0	0	0	0	0
924	1972	chromosome segregation protein SMC	-	-	Q009_RS18435;Q009_02156	false	false	2	2	0.275988	0.739689	0.51229	-1.13812	0.55911	0.290484	4.173	5.31112	0.55911	0.290484	0.2729	0.2782	0	0	0	0	0	0	0	0	0	0	0	0	0	0	0	0	0	1	0	0	0	1	0	0	0	0	0	0
925	1976	lytic transglycosylase	PA14_RS10140;PA14_25000	PA3020;-	PA14_RS10140;PA14_25000	false	false	52	52	1	1	1	0	0	0	5.26735	NaN	0	0	0	0	1	1	1	1	1	1	1	1	1	1	1	1	1	1	1	1	1	1	1	1	1	1	1	1	1	1	1	1
926	1977	sulfatase	PA14_RS21295;PA14_52300	PA0924;-	PA14_RS21295;PA14_52300	false	false	52	52	1	1	1	0	0	0	5.26735	NaN	0	0	0	0	1	1	1	1	1	1	1	1	1	1	1	1	1	1	1	1	1	1	1	1	1	1	1	1	1	1	1	1
927	1978	ATP-dependent metalloprotease	PA14_RS25695;PA14_62860	PA4751;-	PA14_RS25695;PA14_62860	false	false	49	49	0.783754	0.227928	0.607464	0.736503	-0.642202	-0.216479	5.30984	4.57333	-0.642202	-0.216479	0.2209	0.3169	1	1	0	1	1	1	1	1	1	1	1	1	0	1	1	1	1	1	1	1	1	1	1	1	1	1	1	1
928	1979	chemotaxis protein CheA	PA14_RS00910;PA14_02250	PA0178;-	PA14_RS00910;PA14_02250	false	false	48	48	0.118056	0.888597	0.300267	-1.29421	0.927911	0.522492	5.16779	6.462	0.927911	0.522492	0.1172	0.157	1	1	1	1	1	1	1	1	1	1	1	1	1	1	1	1	1	1	1	0	1	1	1	1	1	1	1	1
929	1980	integrase	-	-	NS72_RS15115;-	false	false	4	4	0.627878	0.385183	0.7578	0.387188	-0.414333	-0.120446	5.62475	5.23756	-0.414333	-0.120446	0.3768	0.3704	0	0	1	0	0	0	0	0	0	0	0	0	0	0	0	0	0	0	0	0	0	0	0	0	0	1	0	0
930	1985	type V secretory pathway, adhesin AidA	PA14_RS05280;PA14_13130	PA3923;-	PA3923;-	false	false	50	50	0.896342	0.112489	0.216559	2.13444	-0.948888	-0.664424	5.34944	3.215	-0.948888	-0.664424	0.1191	0.1104	1	1	1	1	1	1	1	1	1	1	1	1	0	0	1	1	1	1	1	1	1	1	1	1	1	1	1	1
931	1989	DNA topoisomerase I	PA14_RS24155;PA14_59180	-	PA14_RS24155;PA14_59180	false	true	31	30	0.540571	0.466787	0.884565	-0.0983576	-0.330881	0.0532701	5.22573	5.32409	-0.330881	0.0532701	0.4618	0.4359	0	1	1	1	0	0	0	0	1	1	1	1	0	0	0	1	0	1	1	1	1	0	0	0	1	0	1	1
932	1992	PrkA family serine protein kinase	PA14_RS03070;PA14_07680	PA0588;-	PA14_RS03070;PA14_07680	false	false	52	52	1	1	1	0	0	0	5.26735	NaN	0	0	0	0	1	1	1	1	1	1	1	1	1	1	1	1	1	1	1	1	1	1	1	1	1	1	1	1	1	1	1	1
933	1994	DEAD/DEAH box helicase	PA14_RS02265;PA14_05560	PA0428;-	PA14_RS02265;PA14_05560	false	false	49	49	0.484347	0.531282	0.94538	0.0983537	0.314844	-0.0243937	5.27302	5.17467	0.314844	-0.0243937	0.4785	0.4848	1	1	1	1	1	1	1	1	1	1	1	1	1	1	1	1	1	1	1	1	1	1	0	0	1	1	1	1
934	1995	threonine--tRNA ligase	PA14_RS11665;PA14_28650	PA2744;-	PA14_RS11665;PA14_28650	false	false	52	52	1	1	1	0	0	0	5.26735	NaN	0	0	0	0	1	1	1	1	1	1	1	1	1	1	1	1	1	1	1	1	1	1	1	1	1	1	1	1	1	1	1	1
935	1997	hypothetical protein	-	-	Q006_RS16920;Q006_02162	false	false	1	1	0.85681	0.158784	0.407391	2.01235	-0.799192	-0.389988	7.241	5.22865	-0.799192	-0.389988	0.1913	0.1918	0	0	0	0	0	0	0	0	0	0	0	0	0	0	0	0	0	0	0	0	0	0	0	0	0	0	0	0
936	2001	chemotaxis protein	PA14_RS22835;PA14_55960	PA4307;-	PA14_RS22835;PA14_55960	false	false	105	46	0.448722	0.562587	0.907812	-0.121319	0.348022	0.0420043	5.25335	5.37467	0.348022	0.0420043	0.4517	0.4515	3	2	1	3	3	2	3	2	3	1	4	2	0	3	1	3	3	2	3	1	0	2	0	2	2	1	1	3
937	2003	TAT-dependent nitrous-oxide reductase	PA14_RS08095;PA14_20200	PA3392;-	PA14_RS08095;PA14_20200	false	false	52	52	1	1	1	0	0	0	5.26735	NaN	0	0	0	0	1	1	1	1	1	1	1	1	1	1	1	1	1	1	1	1	1	1	1	1	1	1	1	1	1	1	1	1
938	2004	restriction endonuclease subunit M	-	-	JF43_RS25895;JF43_26145	false	false	2	2	0.707885	0.308667	0.772964	0.50196	-0.51051	-0.111841	5.75	5.24804	-0.51051	-0.111841	0.3015	0.3761	0	0	0	0	0	0	0	0	0	0	0	0	0	0	0	0	0	0	0	0	0	0	0	0	0	0	1	0
939	2007	ABC transporter ATP-binding protein	PA14_RS28265;PA14_69340	PA5252;-	PA14_RS28265;PA14_69340	false	false	52	52	1	1	1	0	0	0	5.26735	NaN	0	0	0	0	1	1	1	1	1	1	1	1	1	1	1	1	1	1	1	1	1	1	1	1	1	1	1	1	1	1	1	1
940	2010	hypothetical protein	PA14_RS24160;PA14_59200	-	PA14_RS24160;PA14_59200	false	false	32	30	0.540571	0.466787	0.884565	-0.0983576	-0.330881	0.0532701	5.22573	5.32409	-0.330881	0.0532701	0.4618	0.4359	0	1	1	1	0	0	0	0	1	1	1	1	0	0	0	1	0	1	1	1	1	0	0	0	1	0	1	1
941	2013	molecular chaperone DnaK	PA14_RS25745;PA14_62970	PA4761;-	PA14_RS25745;PA14_62970	false	false	50	50	0.621452	0.396772	0.99769	0.00504	-0.40146	-0.0010045	5.26754	5.2625	-0.40146	-0.0010045	0.377	0.511	1	1	0	1	1	1	1	1	1	1	1	1	1	1	1	1	1	1	1	1	1	1	1	1	1	1	1	1
942	2014	phage integrase	-	-	NS42_RS22225;-	false	false	2	2	0.912474	0.0953412	0.2283	2.08172	-1.02072	-0.641494	7.269	5.18728	-1.02072	-0.641494	0.1023	0.1332	0	0	0	0	0	0	0	0	0	0	0	0	0	0	0	0	0	0	0	0	0	0	0	0	0	0	0	0
943	2018	hypothetical protein	-	-	L683_RS62330;L683_25070	false	false	1	1	0.0626977	0.945106	0.203929	-3.07141	1.20275	0.690521	2.255	5.32641	1.20275	0.690521	0.0322	0.0355	0	0	1	0	0	0	0	0	0	0	0	0	0	0	0	0	0	0	0	0	0	0	0	0	0	0	0	0
944	2021	hsp90-like protein	PA14_RS20530;PA14_50590	PA1068;-	PA14_RS20530;PA14_50590	false	false	52	52	1	1	1	0	0	0	5.26735	NaN	0	0	0	0	1	1	1	1	1	1	1	1	1	1	1	1	1	1	1	1	1	1	1	1	1	1	1	1	1	1	1	1
945	2023	hypothetical protein	-	-	NR40_RS29770;-	false	false	3	3	0.970207	0.0325482	0.132567	2.13482	-1.48747	-0.877564	7.279	5.14418	-1.48747	-0.877564	0.0268	0.0765	0	0	0	0	0	0	0	0	0	0	0	0	0	0	0	0	0	0	0	0	0	0	0	0	0	0	0	0
946	2024	potassium transporter Kup	PA14_RS21335;PA14_52400	PA0917;-	PA14_RS21335;PA14_52400	false	false	51	51	0.945106	0.0626977	0.203929	3.07141	-1.20275	-0.690521	5.32641	2.255	-1.20275	-0.690521	0.0322	0.0469	1	1	0	1	1	1	1	1	1	1	1	1	1	1	1	1	1	1	1	1	1	1	1	1	1	1	1	1
947	2025	phosphomethylpyrimidine synthase	PA14_RS26845;PA14_65740	PA4973;-	PA14_RS26845;PA14_65740	false	false	52	52	1	1	1	0	0	0	5.26735	NaN	0	0	0	0	1	1	1	1	1	1	1	1	1	1	1	1	1	1	1	1	1	1	1	1	1	1	1	1	1	1	1	1
948	2031	acyltransferase	-	-	NT88_RS13045;-	false	false	11	11	0.229828	0.776916	0.694709	-0.321432	0.638597	0.158197	5.01391	5.33534	0.638597	0.158197	0.2323	0.3577	0	0	0	0	1	1	1	1	0	0	0	0	0	0	1	0	1	0	0	0	0	0	1	0	0	0	0	0
949	2034	two-component sensor histidine kinase	PA14_RS13065;PA14_31950	PA2524;-	PA14_RS13065;PA14_31950	false	false	53	52	1	1	1	0	0	0	5.26735	NaN	0	0	0	0	1	1	1	1	1	1	1	1	1	1	1	1	1	1	1	1	1	1	1	1	1	1	1	1	1	1	1	1
950	2036	two-component sensor histidine kinase	PA14_RS19095;PA14_46980	PA1336;-	PA14_RS19095;PA14_46980	false	false	51	51	0.703	0.320458	0.566684	1.39416	-0.494228	-0.246659	5.29416	3.9	-0.494228	-0.246659	0.3477	0.363	1	1	1	1	1	1	1	1	1	1	1	1	1	1	1	1	1	1	0	1	1	1	1	1	1	1	1	1
951	2038	peptidase	PA14_RS09965;PA14_24600	PA3054;-	PA14_RS09965;PA14_24600	false	false	52	52	1	1	1	0	0	0	5.26735	NaN	0	0	0	0	1	1	1	1	1	1	1	1	1	1	1	1	1	1	1	1	1	1	1	1	1	1	1	1	1	1	1	1
952	2039	4-hydroxyphenylpyruvate dioxygenase	PA14_RS01195;PA14_03000	PA0242;-	PA14_RS01195;PA14_03000	false	false	52	52	1	1	1	0	0	0	5.26735	NaN	0	0	0	0	1	1	1	1	1	1	1	1	1	1	1	1	1	1	1	1	1	1	1	1	1	1	1	1	1	1	1	1
953	2040	hypothetical protein	PA14_RS15315;PA14_37650	PA2077;-	PA14_RS15315;PA14_37650	false	false	51	51	0.115194	0.897242	0.170482	-3.30929	0.93857	0.768321	5.20371	8.513	0.93857	0.768321	0.1357	0.1393	1	1	1	1	1	1	1	1	1	1	1	1	1	1	1	1	1	1	1	1	1	1	1	1	1	1	1	1
954	2041	molecular chaperone HtpG	PA14_RS17815;PA14_43850	PA1596;-	PA14_RS17815;PA14_43850	false	false	52	52	1	1	1	0	0	0	5.26735	NaN	0	0	0	0	1	1	1	1	1	1	1	1	1	1	1	1	1	1	1	1	1	1	1	1	1	1	1	1	1	1	1	1
955	2042	saccharopine dehydrogenase	PA14_RS22355;PA14_54890	-	PA14_RS22355;PA14_54890	false	false	4	4	0.219859	0.79017	0.393601	-1.06773	0.657856	0.404943	4.28175	5.34948	0.657856	0.404943	0.2158	0.2015	0	0	0	1	0	0	0	0	0	0	0	1	0	0	0	0	0	0	0	0	0	0	0	0	0	0	0	0
956	2043	beta-ketoacyl synthase	PA14_RS27870;PA14_68360	PA5174;-	PA14_RS27870;PA14_68360	false	false	51	51	0.655343	0.369508	0.715611	0.887412	-0.432376	-0.145323	5.28441	4.397	-0.432376	-0.145323	0.3769	0.3919	1	1	1	1	1	1	1	1	1	1	1	1	1	1	1	1	1	1	1	1	0	1	1	1	1	1	1	1
957	2049	DNA mismatch repair protein MutL	PA14_RS26710;PA14_65350	PA4946;-	PA14_RS26710;PA14_65350	false	false	52	52	1	1	1	0	0	0	5.26735	NaN	0	0	0	0	1	1	1	1	1	1	1	1	1	1	1	1	1	1	1	1	1	1	1	1	1	1	1	1	1	1	1	1
958	2051	sigma-54-dependent Fis family transcriptional regulator	-	-	L683_RS44955;L683_09095	false	false	1	1	0.0626977	0.945106	0.203929	-3.07141	1.20275	0.690521	2.255	5.32641	1.20275	0.690521	0.0322	0.0355	0	0	1	0	0	0	0	0	0	0	0	0	0	0	0	0	0	0	0	0	0	0	0	0	0	0	0	0
959	2053	hypothetical protein	-	-	NS12_RS21785;-	false	false	1	1	0.211979	0.806811	0.393487	-2.0722	0.673707	0.40507	3.235	5.3072	0.673707	0.40507	0.2502	0.2516	0	0	0	0	0	0	0	0	0	0	0	0	0	1	0	0	0	0	0	0	0	0	0	0	0	0	0	0
960	2054	acyl-CoA synthetase	PA14_RS05625;PA14_14060	PA3860;-	PA14_RS05625;PA14_14060	false	false	52	52	1	1	1	0	0	0	5.26735	NaN	0	0	0	0	1	1	1	1	1	1	1	1	1	1	1	1	1	1	1	1	1	1	1	1	1	1	1	1	1	1	1	1
961	2055	integrating conjugative element relaxase	-	-	ACP77_RS15020;-	false	false	9	8	0.749241	0.2589	0.444171	0.707795	-0.586869	-0.35245	5.86625	5.15845	-0.586869	-0.35245	0.2547	0.2155	0	0	1	0	0	0	0	0	0	0	0	0	0	0	0	0	0	1	0	0	0	0	0	0	0	1	0	0
962	2061	hypothetical protein	PA14_RS15995;PA14_39440	PA1941;-	PA14_RS15995;PA14_39440	false	false	51	51	0.841216	0.175453	0.370223	2.17518	-0.75584	-0.431536	5.30918	3.134	-0.75584	-0.431536	0.21	0.2256	1	1	1	1	1	1	1	1	1	1	1	0	1	1	1	1	1	1	1	1	1	1	1	1	1	1	1	1
963	2063	hypothetical protein	-	-	NQ81_RS02190;-	false	false	1	1	0.320458	0.703	0.566684	-1.39416	0.494228	0.246659	3.9	5.29416	0.494228	0.246659	0.3477	0.3494	0	0	0	0	0	0	0	0	0	0	0	0	0	0	0	0	0	0	1	0	0	0	0	0	0	0	0	0
964	2064	major capsid protein	-	-	NS42_RS31180;-	false	false	2	2	0.912474	0.0953412	0.2283	2.08172	-1.02072	-0.641494	7.269	5.18728	-1.02072	-0.641494	0.1023	0.1332	0	0	0	0	0	0	0	0	0	0	0	0	0	0	0	0	0	0	0	0	0	0	0	0	0	0	0	0
965	2068	tRNA uridine(34) 5-carboxymethylaminomethyl synthesis enzyme MnmG	PA14_RS29870;PA14_73370	PA5565;-	PA14_RS29870;PA14_73370	false	false	51	51	0.945106	0.0626977	0.203929	3.07141	-1.20275	-0.690521	5.32641	2.255	-1.20275	-0.690521	0.0322	0.0469	1	1	0	1	1	1	1	1	1	1	1	1	1	1	1	1	1	1	1	1	1	1	1	1	1	1	1	1
966	2069	hypothetical protein	-	-	Q000_RS19805;Q000_02664	false	false	2	2	0.603228	0.415223	0.744503	0.56696	-0.381718	-0.128134	5.8125	5.24554	-0.381718	-0.128134	0.3994	0.3705	0	0	0	0	0	0	0	0	0	0	1	0	0	0	0	0	0	0	0	0	0	0	0	0	0	0	0	0
967	2070	acetyltransferase	-	PA3157;-	PA3157;-	false	false	6	6	0.882712	0.123022	0.444026	0.79958	-0.910017	-0.352592	5.97467	5.17509	-0.910017	-0.352592	0.1178	0.2185	0	0	0	0	0	0	0	0	0	0	0	0	1	0	0	0	0	0	0	0	1	0	0	0	0	0	0	0
968	2071	hypothetical protein	-	-	L683_RS66240;L683_24675	false	false	1	1	0.0626977	0.945106	0.203929	-3.07141	1.20275	0.690521	2.255	5.32641	1.20275	0.690521	0.0322	0.0355	0	0	1	0	0	0	0	0	0	0	0	0	0	0	0	0	0	0	0	0	0	0	0	0	0	0	0	0
969	2076	DNA topoisomerase IV subunit B	PA14_RS26815;PA14_65660	PA4967;-	PA14_RS26815;PA14_65660	false	false	51	51	0.824547	0.193189	0.384173	2.11298	-0.714017	-0.415473	5.30798	3.195	-0.714017	-0.415473	0.2293	0.2438	1	1	1	1	1	1	1	1	1	1	1	1	0	1	1	1	1	1	1	1	1	1	1	1	1	1	1	1
970	2079	integrating conjugative element relaxase PFGI-1 class	-	-	ACP77_RS11890;-	false	false	24	22	0.901003	0.102263	0.255275	0.76577	-0.990282	-0.592991	5.70914	4.94337	-0.990282	-0.592991	0.0962	0.1245	0	1	2	0	0	0	0	1	0	0	0	0	1	0	0	0	0	1	1	0	1	0	0	1	0	1	0	1
971	2080	ATP-dependent metallopeptidase HflB	-	-	NS72_RS01890;-	false	false	1	1	0.897242	0.115194	0.170482	3.30929	-0.93857	-0.768321	8.513	5.20371	-0.93857	-0.768321	0.1357	0.137	0	0	0	0	0	0	0	0	0	0	0	0	0	0	0	0	0	0	0	0	0	0	0	0	0	0	0	0
972	2083	hypothetical protein	-	-	PA103_RS29695;PA103_5737	false	false	1	1	0.553007	0.473438	0.985764	0.0434902	-0.324737	-0.00622704	5.31	5.26651	-0.324737	-0.00622704	0.4568	0.4626	0	0	0	0	0	0	0	0	0	0	0	0	0	0	0	0	0	0	0	0	0	0	0	0	0	0	0	1
973	2087	ATP-binding protein	-	-	Q006_RS16890;Q006_02152	false	false	14	14	0.792435	0.21352	0.36472	0.681195	-0.670562	-0.43804	5.76514	5.08395	-0.670562	-0.43804	0.2106	0.1826	0	1	0	0	1	0	0	0	0	0	1	0	1	0	0	1	0	0	0	1	0	0	0	1	0	0	0	0
974	2088	DNA recombination protein RmuC	-	-	ACP77_RS14455;-	false	false	3	3	0.977335	0.0248617	0.0201111	3.24769	-1.60447	-1.69656	8.32767	5.07998	-1.60447	-1.69656	0.0206	0.0133	0	0	0	0	0	0	0	0	0	0	0	0	0	0	0	0	0	0	0	0	0	0	0	0	0	0	0	0
975	2089	propionyl-CoA synthetase	PA14_RS07290;PA14_18150	PA3568;-	PA14_RS07290;PA14_18150	false	false	50	50	0.260311	0.754893	0.726236	-0.60908	0.584507	0.138922	5.24392	5.853	0.584507	0.138922	0.2584	0.3515	1	1	1	1	1	1	1	1	1	1	1	1	1	1	1	1	1	1	1	1	1	1	1	1	1	1	1	1
976	2090	terminase	-	-	Q009_RS17760;Q009_02008	false	true	3	3	0.291347	0.721969	0.508563	-0.94698	0.535589	0.293655	4.375	5.32198	0.535589	0.293655	0.2961	0.2749	0	0	0	0	0	0	0	0	0	0	0	0	0	0	0	0	1	0	0	0	0	1	0	0	0	1	0	0
977	2091	1-deoxy-D-xylulose-5-phosphate synthase	PA14_RS04670;PA14_11550	PA4044;-	PA14_RS04670;PA14_11550	false	false	51	51	0.605082	0.420782	0.789046	0.651882	-0.375943	-0.102898	5.27988	4.628	-0.375943	-0.102898	0.4142	0.431	1	1	1	1	1	1	1	1	1	1	1	1	1	1	1	1	1	1	1	1	1	1	0	1	1	1	1	1
978	2093	hypothetical protein	-	-	NR40_RS22420;-	false	false	3	3	0.970207	0.0325482	0.132567	2.13482	-1.48747	-0.877564	7.279	5.14418	-1.48747	-0.877564	0.0268	0.0765	0	0	0	0	0	0	0	0	0	0	0	0	0	0	0	0	0	0	0	0	0	0	0	0	0	0	0	0
979	2096	Na+/H+ antiporter NhaA	-	-	Q002_RS15190;Q002_01732	false	false	9	9	0.985258	0.0156686	0.0717486	1.56751	-1.80497	-1.14419	6.56356	4.99605	-1.80497	-1.14419	0.0133	0.0412	0	1	0	0	0	0	0	0	0	0	0	0	0	0	0	0	0	0	0	0	0	0	0	0	0	0	0	0
980	2098	hypothetical protein	-	-	NQ81_RS02240;-	false	false	1	1	0.320458	0.703	0.566684	-1.39416	0.494228	0.246659	3.9	5.29416	0.494228	0.246659	0.3477	0.3494	0	0	0	0	0	0	0	0	0	0	0	0	0	0	0	0	0	0	1	0	0	0	0	0	0	0	0	0
981	2100	anthranilate synthase	PA14_RS03825;PA14_09440	PA1903;-	PA14_RS03825;PA14_09440	false	false	55	44	0.234893	0.772828	0.736596	-0.311886	0.629131	0.132771	5.21936	5.53125	0.629131	0.132771	0.2362	0.3615	2	2	1	2	1	1	0	1	1	3	2	1	1	1	1	1	0	1	1	1	1	2	0	1	1	1	1	1
982	2101	asparagine synthetase B	-	-	Q006_RS19165;Q006_02621	false	false	10	10	0.983665	0.0173047	0.0300084	1.80001	-1.76184	-1.52276	6.7212	4.92119	-1.76184	-1.52276	0.0147	0.0159	0	0	0	0	0	0	0	0	0	1	0	0	0	0	0	0	0	0	0	0	0	0	0	0	0	0	1	0
983	2102	ATP-dependent metalloprotease	-	-	ACP77_RS15340;-	false	false	5	5	0.861352	0.145627	0.297176	1.17725	-0.836759	-0.526987	6.3314	5.15415	-0.836759	-0.526987	0.1436	0.1512	0	0	0	0	0	0	0	0	0	0	0	0	0	0	0	0	0	0	0	0	1	0	0	0	0	0	0	0
984	2103	chaperone	PA14_RS11775;PA14_28920	PA2725;-	PA14_RS11775;PA14_28920	false	false	49	49	0.0679315	0.937069	0.0823577	-2.45637	1.16793	1.0843	5.12563	7.582	1.16793	1.0843	0.0689	0.051	1	1	1	1	1	1	1	1	1	1	1	1	1	1	1	1	1	1	1	1	1	1	0	1	1	1	1	1
985	2104	integrating conjugative element relaxase PFGI-1 class	-	-	NS72_RS23070;-	false	false	2	2	0.452653	0.566136	0.894631	0.23052	0.344234	-0.048356	5.489	5.25848	0.344234	-0.048356	0.432	0.4432	0	0	0	0	1	0	0	0	0	0	0	0	0	0	0	0	0	0	0	0	0	0	0	0	0	0	0	0
986	2109	ATP-dependent endonuclease	-	-	NQ73_RS28835;-	false	false	1	1	0.5	0.526562	0.937531	-0.19102	0.30103	0.0280144	5.08	5.27102	0.30103	0.0280144	0.4854	0.4917	0	0	0	0	0	0	0	0	0	0	0	0	0	0	0	0	0	0	0	0	0	0	0	0	0	1	0	0
987	2110	cytosine methyltransferase	-	-	NS86_RS20270;-	false	true	6	6	0.639839	0.370932	0.854456	0.192159	-0.430706	-0.0683102	5.43733	5.24517	-0.430706	-0.0683102	0.3727	0.4271	0	0	0	0	0	0	0	0	0	0	0	0	0	0	0	1	0	0	0	1	0	0	1	0	1	0	0	0
988	2112	sigma-54-dependent Fis family transcriptional regulator	PA14_RS04165;PA14_10290	PA4147;-	PA14_RS04165;PA14_10290	false	false	48	48	0.00389062	0.996489	0.00250067	-3.62879	2.40998	2.60194	4.98821	8.617	2.40998	2.60194	0.0015	0.0018	1	1	1	1	1	1	1	1	1	1	1	1	1	1	1	1	1	1	1	1	1	1	1	1	1	1	1	1
989	2117	RNA helicase	-	-	NT88_RS13040;-	false	false	2	2	0.769607	0.245107	0.444427	1.3272	-0.610645	-0.3522	6.5435	5.2163	-0.610645	-0.3522	0.2491	0.2271	0	0	0	0	0	0	0	0	0	0	0	0	0	0	0	0	0	0	0	0	0	0	0	1	0	0	0	0
990	2119	integrase	-	-	NS72_RS23085;-	false	false	3	3	0.265019	0.747676	0.68789	-0.576259	0.576723	0.162481	4.72433	5.30059	0.576723	0.162481	0.2623	0.358	0	0	0	0	1	0	0	0	0	0	0	0	1	0	0	0	0	0	0	0	0	0	0	0	0	0	0	0
991	2121	hypothetical protein	-	-	NT05_RS31085;-	false	false	1	1	0.446993	0.579218	0.850544	-0.459176	0.349699	0.0703031	4.817	5.27618	0.349699	0.0703031	0.4394	0.4547	0	0	0	0	0	0	0	0	0	0	0	0	0	0	0	0	0	0	0	0	0	0	0	1	0	0	0	0
992	2122	hypothetical protein	-	-	Q000_RS14965;Q000_01671	false	false	1	1	0.158784	0.85681	0.307161	-2.47596	0.799192	0.512634	2.839	5.31496	0.799192	0.512634	0.1896	0.1988	0	0	0	0	0	0	0	0	0	0	1	0	0	0	0	0	0	0	0	0	0	0	0	0	0	0	0	0
993	2123	cysteine protease	PA14_RS15480;PA14_38080	PA2044;-	PA14_RS15480;PA14_38080	false	false	51	51	0.679542	0.344657	0.628769	1.17698	-0.462613	-0.201509	5.28998	4.113	-0.462613	-0.201509	0.3642	0.3804	1	1	1	1	1	1	1	1	1	1	1	1	1	1	1	1	1	1	1	0	1	1	1	1	1	1	1	1
994	2124	MFS transporter	PA14_RS19365;PA14_47640	PA1282;-	PA14_RS19365;PA14_47640	false	false	51	51	0.07134	0.937302	0.0796457	-4.20655	1.14667	1.09884	5.18645	9.393	1.14667	1.09884	0.0581	0.0631	1	1	1	1	1	1	1	1	1	1	1	1	1	1	1	1	1	1	1	1	1	1	1	1	1	1	1	1
995	2125	1-acyl-sn-glycerol-3-phosphate acyltransferase	PA14_RS08765;PA14_21750	PA3267;-	PA14_RS08765;PA14_21750	false	false	52	52	1	1	1	0	0	0	5.26735	NaN	0	0	0	0	1	1	1	1	1	1	1	1	1	1	1	1	1	1	1	1	1	1	1	1	1	1	1	1	1	1	1	1
996	2126	hypothetical protein	-	-	L683_RS62200;L683_24915	false	false	1	1	0.0626977	0.945106	0.203929	-3.07141	1.20275	0.690521	2.255	5.32641	1.20275	0.690521	0.0322	0.0355	0	0	1	0	0	0	0	0	0	0	0	0	0	0	0	0	0	0	0	0	0	0	0	0	0	0	0	0
997	2127	two-component sensor NarX	PA14_RS05530;PA14_13740	PA3878;-	PA14_RS05530;PA14_13740	false	false	51	51	0.605082	0.420782	0.789046	0.651882	-0.375943	-0.102898	5.27988	4.628	-0.375943	-0.102898	0.4142	0.431	1	1	1	1	1	1	1	1	1	1	1	1	1	1	1	1	1	1	1	1	1	1	0	1	1	1	1	1
998	2131	quinoprotein ethanol dehydrogenase	PA14_RS15790;PA14_38860	PA1982;-	PA14_RS15790;PA14_38860	false	false	52	52	1	1	1	0	0	0	5.26735	NaN	0	0	0	0	1	1	1	1	1	1	1	1	1	1	1	1	1	1	1	1	1	1	1	1	1	1	1	1	1	1	1	1
999	2133	hypothetical protein	PA14_RS15310;PA14_37640	PA2078;-	PA14_RS15310;PA14_37640	false	false	51	51	0.115194	0.897242	0.170482	-3.30929	0.93857	0.768321	5.20371	8.513	0.93857	0.768321	0.1357	0.1393	1	1	1	1	1	1	1	1	1	1	1	1	1	1	1	1	1	1	1	1	1	1	1	1	1	1	1	1
1000	2134	hypothetical protein	-	-	NS72_RS22780;-	false	false	1	1	0.897242	0.115194	0.170482	3.30929	-0.93857	-0.768321	8.513	5.20371	-0.93857	-0.768321	0.1357	0.137	0	0	0	0	0	0	0	0	0	0	0	0	0	0	0	0	0	0	0	0	0	0	0	0	0	0	0	0
1001	2137	pilus (MSHA type) biogenesis protein MshL	-	-	NQ81_RS02090;-	false	false	1	1	0.320458	0.703	0.566684	-1.39416	0.494228	0.246659	3.9	5.29416	0.494228	0.246659	0.3477	0.3494	0	0	0	0	0	0	0	0	0	0	0	0	0	0	0	0	0	0	1	0	0	0	0	0	0	0	0	0
1002	2139	cytochrome c	PA14_RS13275;PA14_32540	PA2481;-	PA14_RS13275;PA14_32540	false	false	102	52	1	1	1	0	0	0	5.26735	NaN	0	0	0	0	2	2	2	2	2	2	1	2	2	2	2	2	2	2	2	2	2	2	2	2	2	2	2	2	2	2	2	2
1003	2144	hypothetical protein	-	-	Q002_RS24970;Q002_03733	false	false	2	2	0.112489	0.896342	0.252053	-1.98052	0.948888	0.598508	3.363	5.34352	0.948888	0.598508	0.119	0.1304	0	1	0	0	0	0	0	0	0	0	0	0	0	0	0	0	0	0	0	0	0	0	0	0	1	0	0	0
1004	2147	hypothetical protein	-	-	NT81_RS26715;-	false	false	1	1	0.945106	0.0626977	0.0763877	4.25141	-1.20275	-1.11698	9.437	5.18559	-1.20275	-1.11698	0.0371	0.0372	0	0	0	0	0	0	0	0	0	0	0	0	0	0	0	0	0	0	0	0	0	0	0	0	0	0	0	0
1005	2152	hypothetical protein	-	-	NT80_RS31165;-	false	false	1	1	0.919131	0.091328	0.136629	3.58765	-1.0394	-0.864456	8.786	5.19835	-1.0394	-0.864456	0.0987	0.1028	0	0	0	0	0	0	0	0	0	0	0	0	0	0	0	0	0	0	0	0	0	0	0	0	0	0	0	0
1006	2162	molecular chaperone HscA	PA14_RS05895;PA14_14780	PA3810;-	PA14_RS05895;PA14_14780	false	false	52	52	1	1	1	0	0	0	5.26735	NaN	0	0	0	0	1	1	1	1	1	1	1	1	1	1	1	1	1	1	1	1	1	1	1	1	1	1	1	1	1	1	1	1
1007	2163	peptidyl-prolyl cis-trans isomerase	PA14_RS16690;PA14_41190	PA1805;-	PA14_RS16690;PA14_41190	false	false	52	52	1	1	1	0	0	0	5.26735	NaN	0	0	0	0	1	1	1	1	1	1	1	1	1	1	1	1	1	1	1	1	1	1	1	1	1	1	1	1	1	1	1	1
1008	2164	hypothetical protein	-	PA1370;-	PA1370;-	false	false	2	2	0.424523	0.594029	0.678636	-0.72056	0.372099	0.168363	4.5745	5.29506	0.372099	0.168363	0.4117	0.376	0	0	0	0	0	0	0	0	1	0	0	0	0	0	0	0	0	0	0	0	0	0	0	0	0	0	0	0
1009	2170	preprotein translocase subunit SecD	PA14_RS05840;PA14_14630	PA3821;-	PA14_RS05840;PA14_14630	false	false	52	52	1	1	1	0	0	0	5.26735	NaN	0	0	0	0	1	1	1	1	1	1	1	1	1	1	1	1	1	1	1	1	1	1	1	1	1	1	1	1	1	1	1	1
1010	2171	spermidine dehydrogenase SpdH	PA14_RS06560;PA14_16360	PA3713;-	PA14_RS06560;PA14_16360	false	false	51	51	0.102758	0.908672	0.143718	-3.52545	0.988183	0.84249	5.19955	8.725	0.988183	0.84249	0.1152	0.1196	1	1	1	1	1	1	1	1	1	1	1	1	1	1	1	1	1	1	1	1	1	1	1	1	1	1	1	1
1011	2172	terminase	-	-	PABE177_RS33360;PABE177_6235	false	false	3	3	0.361962	0.652643	0.577863	-0.797701	0.441337	0.238175	4.51567	5.31337	0.441337	0.238175	0.357	0.3057	0	0	0	0	0	0	0	0	0	0	0	0	1	0	0	0	0	0	0	1	0	0	0	0	0	0	0	0
1012	2175	hypothetical protein	-	-	NT42_RS15425;-	false	false	3	3	0.608237	0.406918	0.803605	0.356912	-0.390493	-0.0949575	5.60367	5.24676	-0.390493	-0.0949575	0.3924	0.3854	1	0	0	0	0	0	0	0	0	0	0	0	0	0	0	0	0	0	0	0	0	0	0	0	0	0	0	0
1013	2176	solute-binding protein	PA14_RS16660;PA14_41110	PA1811;-	PA14_RS16660;PA14_41110	false	false	52	52	1	1	1	0	0	0	5.26735	NaN	0	0	0	0	1	1	1	1	1	1	1	1	1	1	1	1	1	1	1	1	1	1	1	1	1	1	1	1	1	1	1	1
1014	2177	hypothetical protein	-	-	L683_RS62315;L683_25055	false	false	1	1	0.0626977	0.945106	0.203929	-3.07141	1.20275	0.690521	2.255	5.32641	1.20275	0.690521	0.0322	0.0355	0	0	1	0	0	0	0	0	0	0	0	0	0	0	0	0	0	0	0	0	0	0	0	0	0	0	0	0
1015	2180	type VI secretion system protein ImpG	PA14_RS00445;PA14_01070	PA0088;-	PA14_RS00445;PA14_01070	false	false	50	50	0.360591	0.657065	0.899833	-0.21908	0.442986	0.0458382	5.25892	5.478	0.442986	0.0458382	0.3541	0.4489	1	1	1	1	1	1	1	1	1	1	1	1	1	1	1	1	1	1	1	1	1	1	0	1	1	1	1	1
1016	2184	RNA polymerase sigma factor RpoD	PA14_RS03010;PA14_07520	PA0576;-	PA14_RS03010;PA14_07520	false	false	51	51	0.945106	0.0626977	0.203929	3.07141	-1.20275	-0.690521	5.32641	2.255	-1.20275	-0.690521	0.0322	0.0469	1	1	0	1	1	1	1	1	1	1	1	1	1	1	1	1	1	1	1	1	1	1	1	1	1	1	1	1
1017	2190	membrane protein	PA14_RS24750;PA14_60580	PA4579;-	PA14_RS24750;PA14_60580	false	false	49	49	0.144649	0.864096	0.333305	-1.38241	0.839683	0.477159	5.18759	6.57	0.839683	0.477159	0.146	0.1731	1	1	1	1	1	1	1	1	1	1	1	1	1	1	1	1	1	1	1	1	1	1	1	1	1	0	1	1
1018	2192	pyocin-S1	-	-	Q006_RS08785;Q006_00496	false	false	12	12	0.598617	0.409804	0.832591	0.1679	-0.387424	-0.0795682	5.3965	5.2286	-0.387424	-0.0795682	0.3969	0.4071	0	0	0	0	0	0	0	0	1	1	0	0	1	0	0	1	0	0	0	0	1	0	0	0	0	0	1	0
1019	2193	aminopeptidase	PA14_RS19700;PA14_48530	PA1221;-	PA14_RS19700;PA14_48530	false	false	51	51	0.369508	0.655343	0.829501	-0.524745	0.432376	0.0811833	5.25725	5.782	0.432376	0.0811833	0.3748	0.3796	1	1	1	1	1	1	1	1	1	1	1	1	1	1	1	1	1	1	1	1	1	1	1	1	1	1	1	1
1020	2197	integrase	-	-	ACP77_RS15005;-	false	true	8	8	0.575431	0.434529	0.899229	0.117477	-0.361981	-0.0461296	5.36675	5.24927	-0.361981	-0.0461296	0.4205	0.4328	1	0	0	0	0	0	0	0	0	0	0	0	0	0	0	0	0	1	0	0	0	0	0	0	0	1	0	1
1021	2202	asparagine synthetase B	-	-	PACIG1_RS30945;PACIG1_5887	false	false	1	1	0.369508	0.655343	0.715611	-0.887412	0.432376	0.145323	4.397	5.28441	0.432376	0.145323	0.3769	0.3771	0	0	0	0	0	0	0	0	0	0	0	0	0	0	0	0	0	0	0	0	1	0	0	0	0	0	0	0
1022	2204	TonB-dependent vitamin B12 receptor	PA14_RS19420;PA14_47800	PA1271;-	PA14_RS19420;PA14_47800	false	false	51	51	0.908672	0.102758	0.274161	2.64929	-0.988183	-0.561994	5.31829	2.669	-0.988183	-0.561994	0.1126	0.1274	1	1	1	1	1	1	0	1	1	1	1	1	1	1	1	1	1	1	1	1	1	1	1	1	1	1	1	1
1023	2205	peptidase S9	PA14_RS15750;PA14_38770	PA1990;-	PA14_RS15750;PA14_38770	false	false	50	50	0.360591	0.657065	0.551003	-1.036	0.442986	0.258846	5.2275	6.2635	0.442986	0.258846	0.3485	0.2718	1	1	1	1	1	1	1	1	1	1	1	0	1	1	1	1	1	1	1	1	1	1	1	1	1	1	1	1
1024	2207	serine hydrolase	PA14_RS16735;PA14_41280	PA1797;-	PA14_RS16735;PA14_41280	false	false	47	47	0.200989	0.807613	0.279535	-1.22062	0.696827	0.553564	5.14998	6.3706	0.696827	0.553564	0.1994	0.1457	1	1	1	1	1	1	1	1	1	1	0	1	1	1	1	1	1	1	1	1	1	1	0	1	1	1	1	1
1025	2208	hypothetical protein	-	-	PA103_RS03230;PA103_0629	false	false	1	1	0.553007	0.473438	0.985764	0.0434902	-0.324737	-0.00622704	5.31	5.26651	-0.324737	-0.00622704	0.4568	0.4626	0	0	0	0	0	0	0	0	0	0	0	0	0	0	0	0	0	0	0	0	0	0	0	0	0	0	0	1
1026	2210	murein transglycosylase B	PA14_RS23535;PA14_57730	PA4444;-	PA14_RS23535;PA14_57730	false	false	103	52	1	1	1	0	0	0	5.26735	NaN	0	0	0	0	2	2	2	2	2	2	2	2	2	2	2	2	2	2	2	2	2	2	2	2	2	2	2	2	2	2	2	2
1027	2211	hypothetical protein	-	-	NR40_RS22410;-	false	false	3	3	0.970207	0.0325482	0.132567	2.13482	-1.48747	-0.877564	7.279	5.14418	-1.48747	-0.877564	0.0268	0.0765	0	0	0	0	0	0	0	0	0	0	0	0	0	0	0	0	0	0	0	0	0	0	0	0	0	0	0	0
1028	2217	ABC transporter	PA14_RS06775;PA14_16890	PA3670;-	PA14_RS06775;PA14_16890	false	false	52	52	1	1	1	0	0	0	5.26735	NaN	0	0	0	0	1	1	1	1	1	1	1	1	1	1	1	1	1	1	1	1	1	1	1	1	1	1	1	1	1	1	1	1
1029	2218	NADH-quinone oxidoreductase subunit L	PA14_RS12185;PA14_29880	PA2647;-	PA14_RS12185;PA14_29880	false	false	52	52	1	1	1	0	0	0	5.26735	NaN	0	0	0	0	1	1	1	1	1	1	1	1	1	1	1	1	1	1	1	1	1	1	1	1	1	1	1	1	1	1	1	1
1030	2219	ABC transporter	PA14_RS16665;PA14_41130	PA1810;-	PA14_RS16665;PA14_41130	false	false	52	52	1	1	1	0	0	0	5.26735	NaN	0	0	0	0	1	1	1	1	1	1	1	1	1	1	1	1	1	1	1	1	1	1	1	1	1	1	1	1	1	1	1	1
1031	2220	biopolymer transporter ExbB	PA14_RS22560;PA14_55360	PA0693;-	PA14_RS22560;PA14_55360	false	false	50	50	0.0269801	0.975851	0.0238699	-3.83308	1.56896	1.62215	5.11992	8.953	1.56896	1.62215	0.0207	0.0207	1	1	1	1	1	1	1	1	1	1	1	1	1	1	1	1	1	1	1	1	1	1	1	1	1	1	1	1
1032	2224	hypothetical protein	-	-	P997_RS31385;P997_05002	false	false	1	1	0.135794	0.878202	0.285721	-2.5871	0.867119	0.544058	2.73	5.3171	0.867119	0.544058	0.1637	0.1691	0	0	0	0	0	0	0	0	0	1	0	0	0	0	0	0	0	0	0	0	0	0	0	0	0	0	0	0
1033	2226	lambda family phage tail tape measure protein	PA14_RS03305;PA14_08240	PA0636;-	PA14_RS03305;PA14_08240	false	false	34	34	0.0732199	0.929416	0.212708	-0.869961	1.13537	0.672216	4.96621	5.83617	1.13537	0.672216	0.071	0.1072	1	1	1	1	1	1	1	1	0	0	1	1	1	1	1	1	1	0	1	1	1	0	1	0	1	0	0	0
1034	2227	heparinase	-	-	NT88_RS26030;-	false	false	11	11	0.229828	0.776916	0.694709	-0.321432	0.638597	0.158197	5.01391	5.33534	0.638597	0.158197	0.2323	0.3577	0	0	0	0	1	1	1	1	0	0	0	0	0	0	1	0	1	0	0	0	0	0	1	0	0	0	0	0
1035	2229	hypothetical protein	-	-	PA103_RS15460;PA103_3035	false	false	1	1	0.553007	0.473438	0.985764	0.0434902	-0.324737	-0.00622704	5.31	5.26651	-0.324737	-0.00622704	0.4568	0.4626	0	0	0	0	0	0	0	0	0	0	0	0	0	0	0	0	0	0	0	0	0	0	0	0	0	0	0	1
1036	2231	nitric oxide reductase activation protein NorD	PA14_RS02740;PA14_06840	PA0525;-	PA14_RS02740;PA14_06840	false	false	52	52	1	1	1	0	0	0	5.26735	NaN	0	0	0	0	1	1	1	1	1	1	1	1	1	1	1	1	1	1	1	1	1	1	1	1	1	1	1	1	1	1	1	1
1037	2233	glutathione-regulated potassium-efflux system protein KefB	PA14_RS19770;PA14_48700	PA1207;-	PA14_RS19770;PA14_48700	false	false	51	51	0.655343	0.369508	0.715611	0.887412	-0.432376	-0.145323	5.28441	4.397	-0.432376	-0.145323	0.3769	0.3919	1	1	1	1	1	1	1	1	1	1	1	1	1	1	1	1	1	1	1	1	0	1	1	1	1	1	1	1
1038	2234	ABC transporter substrate-binding protein	-	-	NQ81_RS26745;-	false	false	1	1	0.320458	0.703	0.566684	-1.39416	0.494228	0.246659	3.9	5.29416	0.494228	0.246659	0.3477	0.3494	0	0	0	0	0	0	0	0	0	0	0	0	0	0	0	0	0	0	1	0	0	0	0	0	0	0	0	0
1039	2236	citrate transporter	PA14_RS05740;PA14_14360	PA3839;-	PA14_RS05740;PA14_14360	false	false	51	51	0.553007	0.473438	0.922567	0.236902	-0.324737	-0.035002	5.2719	5.035	-0.324737	-0.035002	0.463	0.4761	1	1	1	1	1	1	1	1	1	1	1	1	1	1	1	1	1	1	1	1	1	1	1	1	0	1	1	1
1040	2237	integrase	-	-	ACP77_RS02920;-	false	false	14	13	0.984849	0.0159771	0.0188268	1.76631	-1.7965	-1.72522	6.59208	4.82577	-1.7965	-1.72522	0.0155	0.0112	0	0	0	0	0	0	0	0	0	1	0	1	0	0	0	0	0	0	0	0	1	0	0	0	0	0	0	1
1041	2238	dihydroxy-acid dehydratase	PA14_RS01875;PA14_04630	PA0353;-	PA14_RS01875;PA14_04630	false	false	52	52	1	1	1	0	0	0	5.26735	NaN	0	0	0	0	1	1	1	1	1	1	1	1	1	1	1	1	1	1	1	1	1	1	1	1	1	1	1	1	1	1	1	1
1042	2240	mucoidy inhibitor A	PA14_RS18335;PA14_45100	PA1494;-	PA14_RS18335;PA14_45100	false	false	52	52	1	1	1	0	0	0	5.26735	NaN	0	0	0	0	1	1	1	1	1	1	1	1	1	1	1	1	1	1	1	1	1	1	1	1	1	1	1	1	1	1	1	1
1043	2241	sodium:proton antiporter	PA14_RS06425;PA14_16030	PA3739;-	PA14_RS06425;PA14_16030	false	false	51	51	0.679542	0.344657	0.628769	1.17698	-0.462613	-0.201509	5.28998	4.113	-0.462613	-0.201509	0.3642	0.3804	1	1	1	1	1	1	1	1	1	1	1	1	1	1	1	1	1	1	1	0	1	1	1	1	1	1	1	1
1044	2244	ATPase	PA14_RS27825;PA14_68230	PA5165;-	PA14_RS27825;PA14_68230	false	false	52	52	1	1	1	0	0	0	5.26735	NaN	0	0	0	0	1	1	1	1	1	1	1	1	1	1	1	1	1	1	1	1	1	1	1	1	1	1	1	1	1	1	1	1
1045	2247	ATP-dependent endonuclease	-	-	Q011_RS27405;Q011_04084	false	false	1	1	0.297	0.72564	0.544685	-1.47369	0.527244	0.263855	3.822	5.29569	0.527244	0.263855	0.3254	0.3299	0	0	0	0	0	0	0	0	0	0	0	0	0	0	0	0	0	1	0	0	0	0	0	0	0	0	0	0
1046	2250	hypothetical protein	-	-	Q009_RS27675;Q009_04067	false	false	3	3	0.0976357	0.908962	0.251196	-1.63642	1.01039	0.599988	3.72533	5.36176	1.01039	0.599988	0.0922	0.1221	0	0	1	0	0	0	0	0	0	0	0	0	0	0	0	0	0	0	0	0	1	1	0	0	0	0	0	0
1047	2256	glutamine--fructose-6-phosphate aminotransferase	PA14_RS29790;PA14_73170	PA5549;-	PA14_RS29790;PA14_73170	false	false	52	52	1	1	1	0	0	0	5.26735	NaN	0	0	0	0	1	1	1	1	1	1	1	1	1	1	1	1	1	1	1	1	1	1	1	1	1	1	1	1	1	1	1	1
1048	2257	multidrug DMT transporter	-	-	NT49_RS00235;-	false	true	2	2	0.325617	0.691333	0.562822	-1.00552	0.487293	0.249629	4.3005	5.30602	0.487293	0.249629	0.328	0.3193	0	0	0	0	0	0	0	0	0	0	0	0	0	0	0	0	1	0	0	0	0	0	0	0	0	1	0	0
1049	2258	hypothetical protein	-	-	NS72_RS01115;-	false	false	1	1	0.897242	0.115194	0.170482	3.30929	-0.93857	-0.768321	8.513	5.20371	-0.93857	-0.768321	0.1357	0.137	0	0	0	0	0	0	0	0	0	0	0	0	0	0	0	0	0	0	0	0	0	0	0	0	0	0	0	0
1050	2260	hypothetical protein	-	-	Y880_RS02450;-	false	false	1	1	0.937302	0.07134	0.0796457	4.20655	-1.14667	-1.09884	9.393	5.18645	-1.14667	-1.09884	0.0581	0.0638	0	0	0	0	0	0	0	0	0	0	0	0	0	0	0	0	0	0	0	0	0	0	0	0	0	0	0	0
1051	2263	asparagine synthetase B	PA14_RS15280;PA14_37560	PA2084;-	PA14_RS15280;PA14_37560	false	false	52	52	1	1	1	0	0	0	5.26735	NaN	0	0	0	0	1	1	1	1	1	1	1	1	1	1	1	1	1	1	1	1	1	1	1	1	1	1	1	1	1	1	1	1
1052	2266	asparagine synthetase B	PA14_RS00265;PA14_00640	PA0051;-	PA14_RS00265;PA14_00640	false	false	49	49	0.695047	0.318834	0.559724	0.835905	-0.496435	-0.252026	5.31557	4.47967	-0.496435	-0.252026	0.3097	0.2885	1	1	1	1	1	1	1	1	1	1	1	1	0	1	1	1	1	1	1	1	0	1	1	1	1	1	1	1
1053	2267	ABC transporter ATP-binding protein/permease	PA14_RS09080;PA14_22440	PA3228;-	PA14_RS09080;PA14_22440	false	false	53	52	1	1	1	0	0	0	5.26735	NaN	0	0	0	0	1	1	1	1	1	1	1	1	1	1	1	1	1	1	1	1	1	1	1	1	2	1	1	1	1	1	1	1
1054	2268	hypothetical protein	-	-	Y880_RS22050;-	false	false	1	1	0.937302	0.07134	0.0796457	4.20655	-1.14667	-1.09884	9.393	5.18645	-1.14667	-1.09884	0.0581	0.0638	0	0	0	0	0	0	0	0	0	0	0	0	0	0	0	0	0	0	0	0	0	0	0	0	0	0	0	0
1055	2269	chromosome partitioning protein	-	-	NS72_RS01440;-	false	false	1	1	0.897242	0.115194	0.170482	3.30929	-0.93857	-0.768321	8.513	5.20371	-0.93857	-0.768321	0.1357	0.137	0	0	0	0	0	0	0	0	0	0	0	0	0	0	0	0	0	0	0	0	0	0	0	0	0	0	0	0
1056	2275	hypothetical protein	-	-	Q009_RS22310;Q009_02952	false	true	4	4	0.333867	0.678533	0.596171	-0.664729	0.476427	0.224629	4.65375	5.31848	0.476427	0.224629	0.3305	0.3118	0	0	0	0	0	0	0	0	0	0	0	0	1	0	0	0	0	0	0	0	0	1	0	1	0	0	0	0
1057	2279	hypothetical protein	-	-	NS42_RS32280;-	false	false	2	2	0.912474	0.0953412	0.2283	2.08172	-1.02072	-0.641494	7.269	5.18728	-1.02072	-0.641494	0.1023	0.1332	0	0	0	0	0	0	0	0	0	0	0	0	0	0	0	0	0	0	0	0	0	0	0	0	0	0	0	0
1058	2283	phosphogluconate dehydratase	PA14_RS09285;PA14_22910	PA3194;-	PA14_RS09285;PA14_22910	false	false	52	52	1	1	1	0	0	0	5.26735	NaN	0	0	0	0	1	1	1	1	1	1	1	1	1	1	1	1	1	1	1	1	1	1	1	1	1	1	1	1	1	1	1	1
1059	2284	long-chain-acyl-CoA synthetase	PA14_RS10795;PA14_26640	PA2893;-	PA14_RS10795;PA14_26640	false	false	52	52	1	1	1	0	0	0	5.26735	NaN	0	0	0	0	1	1	1	1	1	1	1	1	1	1	1	1	1	1	1	1	1	1	1	1	1	1	1	1	1	1	1	1
1060	2285	excinuclease ABC subunit C	PA14_RS12500;PA14_30660	PA2585;-	PA14_RS12500;PA14_30660	false	false	52	52	1	1	1	0	0	0	5.26735	NaN	0	0	0	0	1	1	1	1	1	1	1	1	1	1	1	1	1	1	1	1	1	1	1	1	1	1	1	1	1	1	1	1
1061	2286	hypothetical protein	-	-	NQ81_RS26770;-	false	false	1	1	0.320458	0.703	0.566684	-1.39416	0.494228	0.246659	3.9	5.29416	0.494228	0.246659	0.3477	0.3494	0	0	0	0	0	0	0	0	0	0	0	0	0	0	0	0	0	0	1	0	0	0	0	0	0	0	0	0
1062	2288	molecular chaperone	PA14_RS26770;-	PA4958;-	PA14_RS26770;-	false	false	52	52	1	1	1	0	0	0	5.26735	NaN	0	0	0	0	1	1	1	1	1	1	1	1	1	1	1	1	1	1	1	1	1	1	1	1	1	1	1	1	1	1	1	1
1063	2289	pyruvate carboxylase	PA14_RS29210;PA14_71720	PA5435;-	PA14_RS29210;PA14_71720	false	false	52	52	1	1	1	0	0	0	5.26735	NaN	0	0	0	0	1	1	1	1	1	1	1	1	1	1	1	1	1	1	1	1	1	1	1	1	1	1	1	1	1	1	1	1
1064	2290	hypothetical protein	-	-	L683_RS44850;L683_08960	false	false	1	1	0.0626977	0.945106	0.203929	-3.07141	1.20275	0.690521	2.255	5.32641	1.20275	0.690521	0.0322	0.0355	0	0	1	0	0	0	0	0	0	0	0	0	0	0	0	0	0	0	0	0	0	0	0	0	0	0	0	0
1065	2291	carbohydrate-binding protein	PA14_RS11405;PA14_28100	PA2783;-	PA14_RS11405;PA14_28100	false	false	50	50	0.810653	0.202501	0.405851	1.4418	-0.693573	-0.391634	5.3228	3.881	-0.693573	-0.391634	0.207	0.21	1	1	1	1	1	1	1	1	1	1	1	0	1	1	1	1	1	1	1	1	1	1	0	1	1	1	1	1
1066	2295	integrase	-	-	ACP77_RS29830;-	false	false	1	1	0.952121	0.0548941	0.041044	4.87643	-1.26047	-1.38675	10.05	5.17357	-1.26047	-1.38675	0.0208	0.0229	0	0	0	0	0	0	0	0	0	0	0	0	0	0	0	0	0	0	0	0	0	0	0	0	0	0	0	0
1067	2298	acyl-CoA dehydrogenase	PA14_RS19355;PA14_47600	PA1284;-	PA14_RS19355;PA14_47600	false	false	52	52	1	1	1	0	0	0	5.26735	NaN	0	0	0	0	1	1	1	1	1	1	1	1	1	1	1	1	1	1	1	1	1	1	1	1	1	1	1	1	1	1	1	1
1068	2300	type II restriction endonuclease	-	-	NT47_RS17380;-	false	false	2	2	0.739689	0.275988	0.691707	0.68968	-0.55911	-0.160078	5.9305	5.24082	-0.55911	-0.160078	0.2645	0.3294	0	0	0	0	0	0	0	0	0	0	0	0	0	0	0	0	0	0	0	0	0	0	0	0	0	0	0	0
1069	2303	precorrin-4 C(11)-methyltransferase	PA14_RS10505;PA14_25920	PA2272;-	PA14_RS10505;PA14_25920	false	false	101	52	1	1	1	0	0	0	5.26735	NaN	0	0	0	0	2	2	2	2	2	2	2	2	2	2	2	2	2	2	2	2	1	2	2	2	1	2	2	2	2	2	2	2
1070	2304	DNA helicase UvrD	-	-	Q002_RS0106260;-	false	false	1	1	0.0548941	0.952121	0.130169	-3.64647	1.26047	0.885492	1.691	5.33747	1.26047	0.885492	0.0183	0.0247	0	1	0	0	0	0	0	0	0	0	0	0	0	0	0	0	0	0	0	0	0	0	0	0	0	0	0	0
1071	2305	GTP-binding protein TypA	PA14_RS27565;PA14_67560	PA5117;-	PA14_RS27565;PA14_67560	false	false	52	52	1	1	1	0	0	0	5.26735	NaN	0	0	0	0	1	1	1	1	1	1	1	1	1	1	1	1	1	1	1	1	1	1	1	1	1	1	1	1	1	1	1	1
1072	2309	integrase	-	-	NT56_RS16855;-	false	false	1	1	0.115194	0.897242	0.278294	-2.62686	0.93857	0.555496	2.691	5.31786	0.93857	0.555496	0.131	0.1396	0	0	0	0	0	0	0	1	0	0	0	0	0	0	0	0	0	0	0	0	0	0	0	0	0	0	0	0
1073	2312	chemotactic transducer PctC	-	-	Q006_RS28195;Q006_04455	false	false	16	15	0.215426	0.790435	0.503783	-0.492847	0.666702	0.297756	4.91667	5.40951	0.666702	0.297756	0.2145	0.2554	0	0	1	0	0	1	0	1	0	0	0	1	1	0	1	0	0	0	0	0	0	0	1	1	1	0	1	0
1074	2313	lipoprotein	PA14_RS23430;PA14_57480	PA4423;-	PA14_RS23430;PA14_57480	false	false	52	52	1	1	1	0	0	0	5.26735	NaN	0	0	0	0	1	1	1	1	1	1	1	1	1	1	1	1	1	1	1	1	1	1	1	1	1	1	1	1	1	1	1	1
1075	2314	hypothetical protein	-	-	NS72_RS01940;-	false	false	1	1	0.897242	0.115194	0.170482	3.30929	-0.93857	-0.768321	8.513	5.20371	-0.93857	-0.768321	0.1357	0.137	0	0	0	0	0	0	0	0	0	0	0	0	0	0	0	0	0	0	0	0	0	0	0	0	0	0	0	0
1076	2315	hypothetical protein	-	-	NT80_RS04455;-	false	false	4	4	0.990672	0.0102244	0.0351927	2.58744	-1.99036	-1.45355	7.65575	5.06831	-1.99036	-1.45355	0.0073	0.022	0	0	0	0	0	0	0	0	0	0	0	0	0	0	0	0	0	0	0	0	0	0	0	0	0	0	0	0
1077	2316	hypothetical protein	-	-	Q011_RS27400;Q011_04083	false	false	1	1	0.297	0.72564	0.544685	-1.47369	0.527244	0.263855	3.822	5.29569	0.527244	0.263855	0.3254	0.3299	0	0	0	0	0	0	0	0	0	0	0	0	0	0	0	0	0	1	0	0	0	0	0	0	0	0	0	0
1078	2318	hypothetical protein	-	-	NR50_RS23340;-	false	false	1	1	0.655343	0.369508	0.829501	0.524745	-0.432376	-0.0811833	5.782	5.25725	-0.432376	-0.0811833	0.3748	0.3808	0	0	0	0	0	0	0	0	0	0	0	0	0	0	0	0	0	0	0	0	0	0	0	0	0	0	0	0
1079	2319	lipid A export permease/ATP-binding protein MsbA	PA14_RS26970;PA14_66080	PA4997;-	PA14_RS26970;PA14_66080	false	false	52	52	1	1	1	0	0	0	5.26735	NaN	0	0	0	0	1	1	1	1	1	1	1	1	1	1	1	1	1	1	1	1	1	1	1	1	1	1	1	1	1	1	1	1
1080	2320	hypothetical protein	-	-	ACP77_RS14395;-	false	false	2	2	0.912474	0.0953412	0.126485	2.62876	-1.02072	-0.897959	7.795	5.16624	-1.02072	-0.897959	0.098	0.0666	0	0	0	0	0	0	0	0	0	0	0	0	0	0	0	0	0	0	0	0	0	0	0	0	0	0	0	0
1081	2321	N-6 DNA methylase	-	-	NR77_RS12835;-	false	false	1	1	0.72564	0.297	0.726497	0.852039	-0.527244	-0.138766	6.103	5.25096	-0.527244	-0.138766	0.3225	0.3241	0	0	0	0	0	0	0	0	0	0	0	0	0	0	0	0	0	0	0	0	0	0	0	0	0	0	0	0
1082	2323	hypothetical protein	-	-	NS72_RS02545;-	false	false	1	1	0.897242	0.115194	0.170482	3.30929	-0.93857	-0.768321	8.513	5.20371	-0.93857	-0.768321	0.1357	0.137	0	0	0	0	0	0	0	0	0	0	0	0	0	0	0	0	0	0	0	0	0	0	0	0	0	0	0	0
1083	2324	hypothetical protein	-	-	P998_RS17080;P998_05856	false	true	1	1	0.679542	0.344657	0.80835	0.59102	-0.462613	-0.0924004	5.847	5.25598	-0.462613	-0.0924004	0.3711	0.3733	0	0	0	0	0	0	0	0	0	0	0	0	0	0	0	0	0	0	0	0	0	0	0	0	0	0	0	0
1084	2327	ABC transporter	PA14_RS15405;PA14_37880	PA2058;-	PA14_RS15405;PA14_37880	false	false	50	50	0.716003	0.300339	0.544923	1.0518	-0.522388	-0.263665	5.3078	4.256	-0.522388	-0.263665	0.3066	0.3031	1	1	1	1	1	1	1	1	0	1	1	1	1	1	1	1	1	1	1	1	1	1	1	1	1	1	1	1
1085	2330	DNA methyltransferase	-	-	ACP77_RS11175;-	false	true	4	4	0.984076	0.0173448	0.0288558	2.68033	-1.76083	-1.53977	7.7415	5.06117	-1.76083	-1.53977	0.0126	0.018	0	0	0	0	0	0	0	0	0	0	0	0	0	0	0	0	0	0	0	0	0	0	0	0	0	0	0	0
1086	2334	peptidase	PA14_RS08020;PA14_20030	PA3406;-	PA14_RS08020;PA14_20030	false	false	46	46	0.241422	0.76742	0.594517	-0.556913	0.617223	0.225836	5.20309	5.76	0.617223	0.225836	0.2351	0.2914	1	1	1	1	1	1	1	1	1	1	1	0	1	1	1	1	1	1	1	1	1	1	1	1	1	1	0	0
1087	2335	EscC/YscC/HrcC family type III secretion system outer membrane ring protein	PA14_RS17185;PA14_42350	PA1716;-	PA14_RS17185;PA14_42350	false	false	51	51	0.115194	0.897242	0.170482	-3.30929	0.93857	0.768321	5.20371	8.513	0.93857	0.768321	0.1357	0.1393	1	1	1	1	1	1	1	1	1	1	1	1	1	1	1	1	1	1	1	1	1	1	1	1	1	1	1	1
1088	2337	acyl-CoA dehydrogenase	PA14_RS02645;PA14_06600	PA0506;-	PA14_RS02645;PA14_06600	false	false	51	51	0.5	0.526562	0.997882	0.00647059	0.30103	-0.000920888	5.26747	5.261	0.30103	-0.000920888	0.4747	0.5209	1	1	1	1	1	1	1	1	1	1	1	1	1	1	1	1	1	1	1	1	1	1	1	1	1	1	0	1
1089	2338	RNA methyltransferase	-	-	PA103_RS17435;PA103_3407	false	false	1	1	0.553007	0.473438	0.985764	0.0434902	-0.324737	-0.00622704	5.31	5.26651	-0.324737	-0.00622704	0.4568	0.4626	0	0	0	0	0	0	0	0	0	0	0	0	0	0	0	0	0	0	0	0	0	0	0	0	0	0	0	1
1090	2340	hypothetical protein	-	PA1383;-	PA1383;-	false	false	29	29	0.796479	0.208774	0.521069	0.431589	-0.680325	-0.283105	5.45824	5.02665	-0.680325	-0.283105	0.2108	0.2603	1	0	0	0	1	0	1	1	0	0	1	0	1	1	0	1	1	0	0	1	0	0	1	1	0	1	1	1
1091	2341	signaling protein	PA14_RS08830;PA14_21870	PA3258;-	PA14_RS08830;PA14_21870	false	false	61	51	0.579218	0.446993	0.850544	0.459176	-0.349699	-0.0703031	5.27618	4.817	-0.349699	-0.0703031	0.4394	0.4513	1	1	1	1	1	2	2	2	2	1	1	1	1	1	2	1	2	1	1	1	1	1	1	0	1	1	1	1
1092	2344	chromosome partitioning protein	-	-	PABE177_RS15065;PABE177_2791	false	false	1	1	0.344657	0.679542	0.628769	-1.17698	0.462613	0.201509	4.113	5.28998	0.462613	0.201509	0.3642	0.366	0	0	0	0	0	0	0	0	0	0	0	0	0	0	0	0	0	0	0	1	0	0	0	0	0	0	0	0
1093	2351	ABC transporter	PA14_RS04695;PA14_11600	PA4039;-	PA14_RS04695;PA14_11600	false	false	50	50	0.797499	0.216186	0.416329	1.41008	-0.665172	-0.380563	5.32158	3.9115	-0.665172	-0.380563	0.221	0.2229	1	1	1	1	1	1	1	1	1	1	1	1	0	1	1	1	1	1	1	1	1	1	0	1	1	1	1	1
1094	2352	membrane protein	PA14_RS23900;PA14_58610	PA4517;-	PA14_RS23900;PA14_58610	false	false	52	52	1	1	1	0	0	0	5.26735	NaN	0	0	0	0	1	1	1	1	1	1	1	1	1	1	1	1	1	1	1	1	1	1	1	1	1	1	1	1	1	1	1	1
1095	2353	acyl-CoA dehydrogenase	PA14_RS27085;PA14_66350	PA5020;-	PA14_RS27085;PA14_66350	false	false	51	51	0.655343	0.369508	0.715611	0.887412	-0.432376	-0.145323	5.28441	4.397	-0.432376	-0.145323	0.3769	0.3919	1	1	1	1	1	1	1	1	1	1	1	1	1	1	1	1	1	1	1	1	0	1	1	1	1	1	1	1
1096	2358	hypothetical protein	-	-	NQ81_RS02395;-	false	false	1	1	0.320458	0.703	0.566684	-1.39416	0.494228	0.246659	3.9	5.29416	0.494228	0.246659	0.3477	0.3494	0	0	0	0	0	0	0	0	0	0	0	0	0	0	0	0	0	0	1	0	0	0	0	0	0	0	0	0
1097	2359	hypothetical protein	-	-	NQ81_RS02375;-	false	false	1	1	0.320458	0.703	0.566684	-1.39416	0.494228	0.246659	3.9	5.29416	0.494228	0.246659	0.3477	0.3494	0	0	0	0	0	0	0	0	0	0	0	0	0	0	0	0	0	0	1	0	0	0	0	0	0	0	0	0
1098	2361	histidine kinase	PA14_RS09055;PA14_22370	PA3233;-	PA14_RS09055;PA14_22370	false	false	52	52	1	1	1	0	0	0	5.26735	NaN	0	0	0	0	1	1	1	1	1	1	1	1	1	1	1	1	1	1	1	1	1	1	1	1	1	1	1	1	1	1	1	1
1099	2362	elongation factor 4	PA14_RS22125;PA14_54370	PA0767;-	PA14_RS22125;PA14_54370	false	false	52	52	1	1	1	0	0	0	5.26735	NaN	0	0	0	0	1	1	1	1	1	1	1	1	1	1	1	1	1	1	1	1	1	1	1	1	1	1	1	1	1	1	1	1
1100	2367	flagellar M-ring protein	PA14_RS20365;PA14_50140	PA1101;-	PA14_RS20365;PA14_50140	false	false	51	51	0.07134	0.937302	0.0796457	-4.20655	1.14667	1.09884	5.18645	9.393	1.14667	1.09884	0.0581	0.0631	1	1	1	1	1	1	1	1	1	1	1	1	1	1	1	1	1	1	1	1	1	1	1	1	1	1	1	1
1101	2368	acyl-CoA dehydrogenase	PA14_RS02650;PA14_06620	PA0507;-	PA14_RS02650;PA14_06620	false	false	50	50	0.823268	0.189347	0.377467	1.5302	-0.722742	-0.423121	5.3262	3.796	-0.722742	-0.423121	0.1876	0.1903	1	1	1	1	1	1	1	1	1	1	1	1	0	1	1	1	1	1	1	1	0	1	1	1	1	1	1	1
1102	2369	hypothetical protein	-	-	Q012_RS26005;Q012_03819	false	false	1	1	0.605082	0.420782	0.909186	0.278	-0.375943	-0.0413471	5.54	5.262	-0.375943	-0.0413471	0.4281	0.438	0	0	0	0	0	0	0	0	0	0	0	0	0	0	0	0	0	0	0	0	0	0	0	0	0	0	0	0
1103	2370	hypothetical protein	-	-	NR39_RS08940;-	false	false	1	1	0.841216	0.175453	0.56205	1.41078	-0.75584	-0.250225	6.651	5.24022	-0.75584	-0.250225	0.2068	0.2079	0	0	0	0	0	0	0	0	0	0	0	0	0	0	0	0	0	0	0	0	0	0	0	0	0	0	0	0
1104	2377	abortive infection protein	-	-	ACP77_RS15140;-	false	false	2	2	0.528451	0.490509	0.596378	0.92056	-0.309353	-0.224479	6.1525	5.23194	-0.309353	-0.224479	0.4704	0.2873	0	0	1	0	0	0	0	0	0	0	0	0	0	0	0	0	0	0	0	0	0	0	0	0	0	0	0	0
1105	2379	helicase SNF2	-	-	NS42_RS22260;-	false	true	2	2	0.912474	0.0953412	0.2283	2.08172	-1.02072	-0.641494	7.269	5.18728	-1.02072	-0.641494	0.1023	0.1332	0	0	0	0	0	0	0	0	0	0	0	0	0	0	0	0	0	0	0	0	0	0	0	0	0	0	0	0
1106	2381	hypothetical protein	-	-	NS00_RS06850;-	false	false	1	1	0.252606	0.768203	0.451335	-1.83055	0.597556	0.345501	3.472	5.30255	0.597556	0.345501	0.2811	0.2835	0	0	0	0	0	0	0	0	0	0	0	0	0	0	0	1	0	0	0	0	0	0	0	0	0	0	0	0
1107	2383	FAD-linked oxidase	PA14_RS04200;PA14_10370	PA4140;-	PA14_RS04200;PA14_10370	false	false	51	51	0.0548941	0.952121	0.041044	-4.87643	1.26047	1.38675	5.17357	10.05	1.26047	1.38675	0.0208	0.0245	1	1	1	1	1	1	1	1	1	1	1	1	1	1	1	1	1	1	1	1	1	1	1	1	1	1	1	1
1108	2384	type VI secretion system protein ImpG	PA14_RS13875;PA14_34010	PA2369;-	PA14_RS13875;PA14_34010	true	false	49	49	0.577786	0.437628	0.684983	0.581918	-0.358895	-0.16432	5.30092	4.719	-0.358895	-0.16432	0.4287	0.3636	1	1	1	1	1	1	1	1	1	1	1	1	1	1	1	1	0	1	1	1	0	1	1	1	1	1	1	1
1109	2385	CRISPR-associated protein Csd1	-	-	NT11_RS05405;-	false	false	8	8	0.791489	0.215865	0.684204	0.377034	-0.665818	-0.164814	5.58638	5.20934	-0.665818	-0.164814	0.2194	0.3349	0	0	0	0	0	0	0	0	1	0	0	0	0	0	0	1	0	0	0	0	0	0	0	0	1	0	0	0
1110	2387	hybrid sensor histidine kinase/response regulator	PA14_RS15740;PA14_38740	PA1992;-	PA14_RS15740;PA14_38740	false	false	51	51	0.655343	0.369508	0.715611	0.887412	-0.432376	-0.145323	5.28441	4.397	-0.432376	-0.145323	0.3769	0.3919	1	1	1	1	1	1	1	1	1	1	1	1	1	1	1	1	1	1	1	1	0	1	1	1	1	1	1	1
1111	2391	acyl-CoA dehydrogenase	PA14_RS02655;PA14_06640	PA0508;-	PA14_RS02655;PA14_06640	false	false	99	51	0.824547	0.193189	0.384173	2.11298	-0.714017	-0.415473	5.30798	3.195	-0.714017	-0.415473	0.2293	0.2438	2	2	3	2	2	2	2	2	2	2	2	2	0	2	2	2	2	2	2	1	1	2	2	2	2	2	2	2
1112	2396	ABC transporter ATP-binding protein	PA14_RS21640;PA14_53150	PA0860;-	PA14_RS21640;PA14_53150	false	false	52	52	1	1	1	0	0	0	5.26735	NaN	0	0	0	0	1	1	1	1	1	1	1	1	1	1	1	1	1	1	1	1	1	1	1	1	1	1	1	1	1	1	1	1
1113	2397	acyl-CoA dehydrogenase	-	PA5187;-	PA5187;-	false	false	50	50	0.958791	0.0455871	0.126533	2.62844	-1.34116	-0.897797	5.36844	2.74	-1.34116	-0.897797	0.0424	0.0514	1	1	1	0	1	1	1	1	1	1	1	1	0	1	1	1	1	1	1	1	1	1	1	1	1	1	1	1
1114	2398	methyl-accepting chemotaxis protein	PA14_RS10660;PA14_26280	PA2920;-	PA14_RS10660;PA14_26280	false	false	49	49	0.0272344	0.975138	0.0388285	-2.90314	1.56488	1.41085	5.09986	8.003	1.56488	1.41085	0.0243	0.0261	1	1	1	1	1	1	1	1	1	1	1	1	1	1	1	1	1	1	1	1	1	1	1	1	1	1	1	1
1115	2408	type VI secretion protein	PA14_RS17470;PA14_43000	PA1660;-	PA14_RS17470;PA14_43000	false	false	52	52	1	1	1	0	0	0	5.26735	NaN	0	0	0	0	1	1	1	1	1	1	1	1	1	1	1	1	1	1	1	1	1	1	1	1	1	1	1	1	1	1	1	1
1116	2409	RNA helicase	-	-	NT80_RS06610;-	false	false	2	2	0.978429	0.0241488	0.0240714	3.82788	-1.6171	-1.6185	8.948	5.12012	-1.6171	-1.6185	0.0145	0.0189	0	0	0	0	0	0	0	0	0	0	0	0	0	0	0	0	0	0	0	0	0	0	0	0	0	0	0	0
1117	2410	PAS domain-containing sensor histidine kinase	PA14_RS29465;PA14_72390	PA5484;-	PA14_RS29465;PA14_72390	false	false	53	52	1	1	1	0	0	0	5.26735	NaN	0	0	0	0	1	1	1	1	1	1	1	1	1	1	1	1	1	1	1	1	1	1	1	1	2	1	1	1	1	1	1	1
1118	2411	hypothetical protein	-	-	NR39_RS08990;-	false	false	1	1	0.841216	0.175453	0.56205	1.41078	-0.75584	-0.250225	6.651	5.24022	-0.75584	-0.250225	0.2068	0.2079	0	0	0	0	0	0	0	0	0	0	0	0	0	0	0	0	0	0	0	0	0	0	0	0	0	0	0	0
1119	2421	ATP-dependent endonuclease	-	-	Q002_RS15350;Q002_01765	false	false	2	2	0.230393	0.783814	0.411328	-1.42516	0.637531	0.385811	3.897	5.32216	0.637531	0.385811	0.2355	0.2186	0	1	0	0	0	0	0	0	0	0	0	0	0	0	0	0	0	0	0	0	0	0	0	0	0	0	0	0
1120	2422	secretion pathway ATPase	PA14_RS28055;PA14_68820	PA5210;-	PA14_RS28055;PA14_68820	false	false	49	49	0.895423	0.111869	0.282872	1.53278	-0.95129	-0.54841	5.35578	3.823	-0.95129	-0.54841	0.1067	0.1441	1	1	0	1	1	1	1	1	1	1	1	1	1	1	1	1	1	1	1	1	0	1	1	0	1	1	1	1
1121	2423	muropeptide MFS transporter AmpG	PA14_RS23280;PA14_57100	PA4393;-	PA14_RS23280;PA14_57100	false	false	52	52	1	1	1	0	0	0	5.26735	NaN	0	0	0	0	1	1	1	1	1	1	1	1	1	1	1	1	1	1	1	1	1	1	1	1	1	1	1	1	1	1	1	1
1122	2424	thiamine biosynthesis protein ThiF	-	-	NR50_RS21130;-	false	false	2	2	0.603228	0.415223	0.922103	0.1702	-0.381718	-0.0352207	5.431	5.2608	-0.381718	-0.0352207	0.393	0.4431	0	0	0	0	0	0	0	0	0	0	0	0	0	0	0	0	0	0	0	0	0	0	0	0	0	1	0	0
1123	2429	helicase SNF2	-	-	NQ81_RS02415;-	false	false	1	1	0.320458	0.703	0.566684	-1.39416	0.494228	0.246659	3.9	5.29416	0.494228	0.246659	0.3477	0.3494	0	0	0	0	0	0	0	0	0	0	0	0	0	0	0	0	0	0	1	0	0	0	0	0	0	0	0	0
1124	2430	membrane protein	PA14_RS29410;PA14_72230	PA5473;-	PA14_RS29410;PA14_72230	false	false	52	52	1	1	1	0	0	0	5.26735	NaN	0	0	0	0	1	1	1	1	1	1	1	1	1	1	1	1	1	1	1	1	1	1	1	1	1	1	1	1	1	1	1	1
1125	2432	hypothetical protein	PA14_RS23770;PA14_58270	PA4491;-	PA14_RS23770;PA14_58270	false	false	52	52	1	1	1	0	0	0	5.26735	NaN	0	0	0	0	1	1	1	1	1	1	1	1	1	1	1	1	1	1	1	1	1	1	1	1	1	1	1	1	1	1	1	1
1126	2435	NADH-quinone oxidoreductase subunit C/D	PA14_RS12225;PA14_29990	PA2639;-	PA14_RS12225;PA14_29990	false	false	52	52	1	1	1	0	0	0	5.26735	NaN	0	0	0	0	1	1	1	1	1	1	1	1	1	1	1	1	1	1	1	1	1	1	1	1	1	1	1	1	1	1	1	1
1127	2436	peptidase	PA14_RS19550;PA14_48115	PA1246;-	PA14_RS19550;PA14_48115	false	false	48	48	0.653549	0.359207	0.644574	0.578875	-0.444655	-0.190728	5.31187	4.733	-0.444655	-0.190728	0.3609	0.3451	1	1	1	1	1	1	1	1	1	1	1	1	0	1	1	1	1	1	1	1	0	1	1	1	1	1	0	1
1128	2442	short chain dehydrogenase	PA14_RS08465;PA14_21050	PA3324;-	PA14_RS08465;PA14_21050	false	false	51	51	0.526562	0.5	0.937531	0.19102	-0.30103	-0.0280144	5.27102	5.08	-0.30103	-0.0280144	0.4854	0.5014	1	1	1	1	1	1	1	1	1	1	1	1	1	1	1	1	1	1	1	1	1	1	1	1	1	0	1	1
1129	2443	hypothetical protein	-	-	ACP77_RS14440;-	false	false	2	2	0.912474	0.0953412	0.126485	2.62876	-1.02072	-0.897959	7.795	5.16624	-1.02072	-0.897959	0.098	0.0666	0	0	0	0	0	0	0	0	0	0	0	0	0	0	0	0	0	0	0	0	0	0	0	0	0	0	0	0
1130	2445	2-isopropylmalate synthase	PA14_RS05985;PA14_15030	PA3792;-	PA14_RS05985;PA14_15030	false	false	51	51	0.553007	0.473438	0.922567	0.236902	-0.324737	-0.035002	5.2719	5.035	-0.324737	-0.035002	0.463	0.4761	1	1	1	1	1	1	1	1	1	1	1	1	1	1	1	1	1	1	1	1	1	1	1	1	0	1	1	1
1131	2446	restriction endonuclease subunit M	-	-	Y880_RS01595;-	false	false	3	3	0.562372	0.453137	0.770588	0.418463	-0.343771	-0.113178	5.66167	5.2432	-0.343771	-0.113178	0.4453	0.3802	0	0	0	0	0	0	0	0	0	0	0	0	1	0	0	0	0	0	0	0	1	0	0	0	0	0	0	0
1132	2448	thiamine pyrophosphate-requiring protein	PA14_RS15195;PA14_37340	PA2108;-	PA14_RS15195;PA14_37340	false	false	49	49	0.0272344	0.975138	0.0388285	-2.90314	1.56488	1.41085	5.09986	8.003	1.56488	1.41085	0.0243	0.0261	1	1	1	1	1	1	1	1	1	1	1	1	1	1	1	1	1	1	1	1	1	1	1	1	1	1	1	1
1133	2449	thiol:disulfide interchange protein	PA14_RS26190;PA14_64080	PA4845;-	PA14_RS26190;PA14_64080	false	false	52	52	1	1	1	0	0	0	5.26735	NaN	0	0	0	0	1	1	1	1	1	1	1	1	1	1	1	1	1	1	1	1	1	1	1	1	1	1	1	1	1	1	1	1
1134	2451	thiol:disulfide interchange protein	PA14_RS13290;PA14_32590	PA2478;-	PA14_RS13290;PA14_32590	false	false	50	50	0.657065	0.360591	0.631264	0.83444	-0.442986	-0.199789	5.29944	4.465	-0.442986	-0.199789	0.3411	0.3466	1	1	1	1	1	1	1	0	1	1	1	1	1	1	1	1	1	1	1	1	1	1	1	1	1	1	1	1
1135	2454	gluconate dehydrogenase	PA14_RS14360;PA14_35290	PA2265;-	PA14_RS14360;PA14_35290	false	false	50	50	0.260311	0.754893	0.467915	-1.26012	0.584507	0.329833	5.21888	6.479	0.584507	0.329833	0.248	0.216	1	1	1	1	1	1	1	1	1	1	1	1	1	1	1	1	0	1	1	1	1	1	1	1	1	1	1	1
1136	2455	glyoxylate carboligase	PA14_RS18295;PA14_45000	PA1502;-	PA14_RS18295;PA14_45000	false	false	51	51	0.945106	0.0626977	0.203929	3.07141	-1.20275	-0.690521	5.32641	2.255	-1.20275	-0.690521	0.0322	0.0469	1	1	0	1	1	1	1	1	1	1	1	1	1	1	1	1	1	1	1	1	1	1	1	1	1	1	1	1
1137	2456	aspartate--tRNA ligase	PA14_RS21090;PA14_51820	PA0963;-	PA14_RS21090;PA14_51820	false	false	53	52	1	1	1	0	0	0	5.26735	NaN	0	0	0	0	1	1	1	1	1	1	1	1	1	1	1	1	1	1	1	1	1	1	1	1	2	1	1	1	1	1	1	1
1138	2457	hemolysin activation/secretion protein	-	-	NS33_RS29005;-	false	false	1	1	0.0808686	0.92866	0.237777	-2.85729	1.09222	0.62383	2.465	5.32229	1.09222	0.62383	0.0784	0.0811	0	0	0	0	1	0	0	0	0	0	0	0	0	0	0	0	0	0	0	0	0	0	0	0	0	0	0	0
1139	2458	integrase	-	-	NT42_RS12350;-	false	false	4	4	0.780141	0.230157	0.630328	0.603854	-0.637975	-0.200434	5.82475	5.2209	-0.637975	-0.200434	0.2262	0.3101	1	0	0	0	0	0	0	0	0	0	0	0	0	0	0	0	0	0	0	0	0	0	0	0	0	0	0	0
1140	2460	hypothetical protein	-	-	NT42_RS04445;-	false	false	1	1	0.0478789	0.9584	0.106776	-3.87996	1.31986	0.971528	1.462	5.34196	1.31986	0.971528	0	0.008	1	0	0	0	0	0	0	0	0	0	0	0	0	0	0	0	0	0	0	0	0	0	0	0	0	0	0	0
1141	2461	glycosyl transferase family protein	-	PA1391;-	PA1391;-	false	false	28	28	0.858549	0.145606	0.37873	0.588738	-0.836822	-0.42167	5.53907	4.95033	-0.836822	-0.42167	0.1484	0.1913	1	0	0	0	1	0	1	1	0	0	1	0	0	1	0	1	1	0	0	1	0	0	1	1	0	1	1	1
1142	2462	hypothetical protein	-	-	NS72_RS23030;-	false	false	1	1	0.897242	0.115194	0.170482	3.30929	-0.93857	-0.768321	8.513	5.20371	-0.93857	-0.768321	0.1357	0.137	0	0	0	0	0	0	0	0	0	0	0	0	0	0	0	0	0	0	0	0	0	0	0	0	0	0	0	0
1143	2464	dynamin	-	-	NQ67_RS21930;-	false	false	1	1	0.92866	0.0808686	0.103292	3.918	-1.09222	-0.985933	9.11	5.192	-1.09222	-0.985933	0.0776	0.0812	0	0	0	0	0	0	0	0	0	0	0	0	0	0	0	0	0	0	0	0	0	0	0	0	0	0	0	0
1144	2466	peptidase S8	PA14_RS19570;PA14_48170	PA1242;-	PA14_RS19570;PA14_48170	false	false	52	52	1	1	1	0	0	0	5.26735	NaN	0	0	0	0	1	1	1	1	1	1	1	1	1	1	1	1	1	1	1	1	1	1	1	1	1	1	1	1	1	1	1	1
1145	2470	alcohol dehydrogenase	PA14_RS14355;PA14_35270	PA2266;-	PA14_RS14355;PA14_35270	false	false	50	50	0.260311	0.754893	0.467915	-1.26012	0.584507	0.329833	5.21888	6.479	0.584507	0.329833	0.248	0.216	1	1	1	1	1	1	1	1	1	1	1	1	1	1	1	1	0	1	1	1	1	1	1	1	1	1	1	1
1146	2471	resistance-nodulation-cell division (RND) multidrug efflux membrane fusion protein MexE	PA14_RS13220;PA14_32400	PA2492;-	PA14_RS13220;PA14_32400	false	false	103	52	1	1	1	0	0	0	5.26735	NaN	0	0	0	0	2	2	2	2	2	2	2	2	2	2	2	2	2	2	2	2	2	2	2	2	2	2	2	2	2	2	2	2
1147	2472	hypothetical protein	-	-	Y880_RS25370;-	false	false	1	1	0.937302	0.07134	0.0796457	4.20655	-1.14667	-1.09884	9.393	5.18645	-1.14667	-1.09884	0.0581	0.0638	0	0	0	0	0	0	0	0	0	0	0	0	0	0	0	0	0	0	0	0	0	0	0	0	0	0	0	0
1148	2475	succinate dehydrogenase flavoprotein subunit	PA14_RS17880;PA14_44030	PA1583;-	PA14_RS17880;PA14_44030	false	false	52	52	1	1	1	0	0	0	5.26735	NaN	0	0	0	0	1	1	1	1	1	1	1	1	1	1	1	1	1	1	1	1	1	1	1	1	1	1	1	1	1	1	1	1
1149	2477	hypothetical protein	PA14_RS25220;PA14_61720	PA4667;-	PA14_RS25220;PA14_61720	false	false	52	52	1	1	1	0	0	0	5.26735	NaN	0	0	0	0	1	1	1	1	1	1	1	1	1	1	1	1	1	1	1	1	1	1	1	1	1	1	1	1	1	1	1	1
1150	2479	membrane protein	PA14_RS14480;PA14_35620	PA2241;-	PA14_RS14480;PA14_35620	false	false	50	49	0.00600603	0.99463	0.00296256	-4.08252	2.22141	2.52833	5.03182	9.11433	2.22141	2.52833	0.0024	0.0032	1	1	1	1	1	1	1	1	1	1	1	1	1	1	1	1	1	1	1	1	1	1	1	1	1	1	1	1
1151	2483	multidrug ABC transporter ATP-binding protein	-	-	NQ73_RS14295;-	false	false	2	2	0.342935	0.674383	0.625307	-0.849	0.464788	0.203907	4.451	5.3	0.464788	0.203907	0.3337	0.347	0	0	0	0	0	0	0	0	0	0	0	0	0	0	0	0	0	1	0	0	0	0	0	0	0	1	0	0
1152	2485	two-component sensor histidine kinase	PA14_RS29605;PA14_72740	PA5512;-	PA14_RS29605;PA14_72740	false	false	52	52	1	1	1	0	0	0	5.26735	NaN	0	0	0	0	1	1	1	1	1	1	1	1	1	1	1	1	1	1	1	1	1	1	1	1	1	1	1	1	1	1	1	1
1153	2487	trehalase	PA14_RS13635;PA14_33450	PA2416;-	PA14_RS13635;PA14_33450	false	false	46	46	0.370932	0.639839	0.638337	-0.491913	0.430706	0.19495	5.21059	5.7025	0.430706	0.19495	0.3607	0.3041	1	0	1	1	1	1	1	1	1	1	0	1	1	1	1	1	1	1	1	1	1	1	1	1	0	1	1	1
1154	2491	asparagine synthetase B	PA14_RS07750;PA14_19370	PA3459;-	PA14_RS07750;PA14_19370	false	false	51	51	0.841216	0.175453	0.370223	2.17518	-0.75584	-0.431536	5.30918	3.134	-0.75584	-0.431536	0.21	0.2256	1	1	1	1	1	1	1	1	1	1	1	0	1	1	1	1	1	1	1	1	1	1	1	1	1	1	1	1
1155	2492	ABC transporter ATP-binding protein	-	-	ACP77_RS11560;-	false	false	8	8	0.429543	0.580393	0.841109	-0.185955	0.366993	0.0751476	5.11	5.29595	0.366993	0.0751476	0.419	0.4241	0	0	0	0	0	0	0	0	1	0	1	0	0	1	0	0	0	0	0	0	0	0	0	0	0	0	1	0
1156	2493	hypothetical protein	-	-	Q009_RS32145;Q009_05002	false	false	1	1	0.394918	0.630492	0.755716	-0.757922	0.403493	0.121641	4.524	5.28192	0.403493	0.121641	0.4021	0.4067	0	0	0	0	0	0	0	0	0	0	0	0	0	0	0	0	0	0	0	0	0	1	0	0	0	0	0	0
1157	2494	hypothetical protein	-	-	Q000_RS28115;Q000_04376	false	false	1	1	0.158784	0.85681	0.307161	-2.47596	0.799192	0.512634	2.839	5.31496	0.799192	0.512634	0.1896	0.1988	0	0	0	0	0	0	0	0	0	0	1	0	0	0	0	0	0	0	0	0	0	0	0	0	0	0	0	0
1158	2498	bifunctional isocitrate dehydrogenase kinase/phosphatase	PA14_RS18855;PA14_46450	PA1376;-	PA14_RS18855;PA14_46450	false	false	52	52	1	1	1	0	0	0	5.26735	NaN	0	0	0	0	1	1	1	1	1	1	1	1	1	1	1	1	1	1	1	1	1	1	1	1	1	1	1	1	1	1	1	1
1159	2500	carbamoyltransferase	PA14_RS27010;PA14_66170	PA5005;-	PA14_RS27010;PA14_66170	false	false	52	52	1	1	1	0	0	0	5.26735	NaN	0	0	0	0	1	1	1	1	1	1	1	1	1	1	1	1	1	1	1	1	1	1	1	1	1	1	1	1	1	1	1	1
1160	2501	isovaleryl-CoA dehydrogenase	PA14_RS07160;PA14_17810	PA3593;-	PA14_RS07160;PA14_17810	false	false	50	50	0.164663	0.84686	0.313537	-1.74528	0.783405	0.503711	5.20022	6.9455	0.783405	0.503711	0.1698	0.1672	1	1	1	1	1	1	1	1	1	1	1	1	1	1	1	1	1	1	1	1	1	1	1	1	1	1	1	1
1161	2502	ABC transporter ATP-binding protein	PA14_RS20295;PA14_49970	PA1113;-	PA14_RS20295;PA14_49970	false	false	50	50	0.0801994	0.926654	0.108902	-2.7546	1.09583	0.962965	5.1614	7.916	1.09583	0.962965	0.0779	0.0544	1	1	1	1	1	1	1	1	1	1	1	1	1	1	1	1	1	1	1	1	1	1	1	1	1	1	1	1
1162	2508	membrane protein	PA14_RS09880;PA14_24390	PA3074;-	PA14_RS09880;PA14_24390	false	false	50	50	0.360591	0.657065	0.551003	-1.036	0.442986	0.258846	5.2275	6.2635	0.442986	0.258846	0.3485	0.2718	1	1	1	1	1	1	1	1	1	1	1	0	1	1	1	1	1	1	1	1	1	1	1	1	1	1	1	1
1163	2515	arginine--tRNA ligase	PA14_RS27240;PA14_66750	PA5051;-	PA14_RS27240;PA14_66750	false	false	52	52	1	1	1	0	0	0	5.26735	NaN	0	0	0	0	1	1	1	1	1	1	1	1	1	1	1	1	1	1	1	1	1	1	1	1	1	1	1	1	1	1	1	1
1164	2516	sensor domain-containing phosphodiesterase	PA14_RS12830;PA14_31330	PA2567;-	PA14_RS12830;PA14_31330	false	false	52	52	1	1	1	0	0	0	5.26735	NaN	0	0	0	0	1	1	1	1	1	1	1	1	1	1	1	1	1	1	1	1	1	1	1	1	1	1	1	1	1	1	1	1
1165	2517	terminase	-	-	Q009_RS28275;Q009_04194	false	true	12	10	0.910959	0.0928405	0.111935	1.333	-1.03226	-0.951034	6.344	5.011	-1.03226	-0.951034	0.0953	0.0599	0	0	0	0	1	0	0	0	1	0	0	0	0	0	0	0	0	0	0	0	0	1	0	0	0	1	0	0
1166	2518	terminase	-	-	NT05_RS02510;-	false	true	3	3	0.0476593	0.956111	0.134875	-2.12246	1.32185	0.870068	3.26733	5.3898	1.32185	0.870068	0.049	0.06	0	0	1	0	0	0	0	0	0	1	0	0	0	0	0	0	0	0	0	0	0	0	0	1	0	0	0	0
1167	2520	hypothetical protein	-	-	NR50_RS23335;-	false	false	1	1	0.655343	0.369508	0.829501	0.524745	-0.432376	-0.0811833	5.782	5.25725	-0.432376	-0.0811833	0.3748	0.3808	0	0	0	0	0	0	0	0	0	0	0	0	0	0	0	0	0	0	0	0	0	0	0	0	0	0	0	0
1168	2521	molecular chaperone of HSP90 family	-	-	L683_RS56065;L683_19150	false	false	1	1	0.0626977	0.945106	0.203929	-3.07141	1.20275	0.690521	2.255	5.32641	1.20275	0.690521	0.0322	0.0355	0	0	1	0	0	0	0	0	0	0	0	0	0	0	0	0	0	0	0	0	0	0	0	0	0	0	0	0
1169	2532	hypothetical protein	PA14_RS12980;PA14_31720	PA2540;-	PA14_RS12980;PA14_31720	false	false	52	52	1	1	1	0	0	0	5.26735	NaN	0	0	0	0	1	1	1	1	1	1	1	1	1	1	1	1	1	1	1	1	1	1	1	1	1	1	1	1	1	1	1	1
1170	2533	hypothetical protein	-	-	Q009_RS31195;Q009_04799	false	true	16	15	0.339413	0.667952	0.586994	-0.400746	0.469272	0.231366	4.9822	5.38295	0.469272	0.231366	0.3268	0.288	0	0	0	0	1	0	1	0	1	0	0	0	0	0	0	1	1	1	0	0	0	1	1	1	1	0	0	0
1171	2541	poly-beta-hydroxybutyrate polymerase	-	-	NQ73_RS14315;-	false	false	1	1	0.5	0.526562	0.937531	-0.19102	0.30103	0.0280144	5.08	5.27102	0.30103	0.0280144	0.4854	0.4917	0	0	0	0	0	0	0	0	0	0	0	0	0	0	0	0	0	0	0	0	0	0	0	0	0	1	0	0
1172	2546	PTS fructose transporter subunit IIBC	PA14_RS07335;PA14_18275	PA3560;-	PA14_RS07335;PA14_18275	false	false	50	50	0.164663	0.84686	0.313537	-1.74528	0.783405	0.503711	5.20022	6.9455	0.783405	0.503711	0.1698	0.1672	1	1	1	1	1	1	1	1	1	1	1	1	1	1	1	1	1	1	1	1	1	1	1	1	1	1	1	1
1173	2547	acetyltransferase	PA14_RS07745;PA14_19360	PA3460;-	PA14_RS07745;PA14_19360	false	false	51	51	0.841216	0.175453	0.370223	2.17518	-0.75584	-0.431536	5.30918	3.134	-0.75584	-0.431536	0.21	0.2256	1	1	1	1	1	1	1	1	1	1	1	0	1	1	1	1	1	1	1	1	1	1	1	1	1	1	1	1
1174	2548	type V secretory pathway, adhesin AidA	PA14_RS07935;PA14_19810	PA3422;-	PA3422;-	false	false	51	51	0.655343	0.369508	0.715611	0.887412	-0.432376	-0.145323	5.28441	4.397	-0.432376	-0.145323	0.3769	0.3919	1	1	1	1	1	1	1	1	1	1	1	1	1	1	1	1	1	1	1	1	0	1	1	1	1	1	1	1
1175	2549	ABC transporter	PA14_RS22395;PA14_54970	-	PA14_RS22395;PA14_54970	false	false	4	4	0.219859	0.79017	0.393601	-1.06773	0.657856	0.404943	4.28175	5.34948	0.657856	0.404943	0.2158	0.2015	0	0	0	1	0	0	0	0	0	0	0	1	0	0	0	0	0	0	0	0	0	0	0	0	0	0	0	0
1176	2550	potassium transporter	PA14_RS29690;PA14_72940	PA5529;-	PA14_RS29690;PA14_72940	false	false	51	51	0.824547	0.193189	0.384173	2.11298	-0.714017	-0.415473	5.30798	3.195	-0.714017	-0.415473	0.2293	0.2438	1	1	1	1	1	1	1	1	1	1	1	1	0	1	1	1	1	1	1	1	1	1	1	1	1	1	1	1
1177	2551	hypothetical protein	-	-	NS72_RS01180;-	false	false	1	1	0.897242	0.115194	0.170482	3.30929	-0.93857	-0.768321	8.513	5.20371	-0.93857	-0.768321	0.1357	0.137	0	0	0	0	0	0	0	0	0	0	0	0	0	0	0	0	0	0	0	0	0	0	0	0	0	0	0	0
1178	2552	hypothetical protein	-	-	NT47_RS23095;-	false	false	1	1	0.703	0.320458	0.734059	0.827569	-0.494228	-0.134269	6.079	5.25143	-0.494228	-0.134269	0.34	0.349	0	0	0	0	0	0	0	0	0	0	0	0	0	0	0	0	0	0	0	0	0	0	0	0	0	0	0	0
1179	2554	hypothetical protein	-	-	NR40_RS26265;-	false	false	3	3	0.970207	0.0325482	0.132567	2.13482	-1.48747	-0.877564	7.279	5.14418	-1.48747	-0.877564	0.0268	0.0765	0	0	0	0	0	0	0	0	0	0	0	0	0	0	0	0	0	0	0	0	0	0	0	0	0	0	0	0
1180	2558	hypothetical protein	-	-	ACP77_RS11185;-	false	true	14	14	0.908349	0.0950935	0.210912	0.936699	-1.02185	-0.675899	5.95186	5.01516	-1.02185	-0.675899	0.0947	0.1085	0	0	0	0	0	0	0	1	0	0	1	0	0	0	0	0	1	0	0	1	0	0	1	1	0	0	0	0
1181	2560	ABC transporter	PA14_RS22400;PA14_54980	-	PA14_RS22400;PA14_54980	false	false	4	4	0.219859	0.79017	0.393601	-1.06773	0.657856	0.404943	4.28175	5.34948	0.657856	0.404943	0.2158	0.2015	0	0	0	1	0	0	0	0	0	0	0	1	0	0	0	0	0	0	0	0	0	0	0	0	0	0	0	0
1182	2566	malto-oligosyltrehalose trehalohydrolase	PA14_RS14890;PA14_36580	PA2164;-	PA14_RS14890;PA14_36580	false	false	49	49	0.406918	0.608237	0.928916	0.128068	0.390493	-0.0320238	5.27473	5.14667	0.390493	-0.0320238	0.3917	0.4909	1	1	1	1	1	1	1	1	1	1	1	1	1	1	1	1	0	1	1	1	1	1	1	1	1	1	1	1
1183	2568	hypothetical protein	-	-	Y880_RS01585;-	false	false	3	3	0.562372	0.453137	0.770588	0.418463	-0.343771	-0.113178	5.66167	5.2432	-0.343771	-0.113178	0.4453	0.3802	0	0	0	0	0	0	0	0	0	0	0	0	1	0	0	0	0	0	0	0	1	0	0	0	0	0	0	0
1184	2572	gamma-glutamyltransferase	PA14_RS01920;PA14_04730	PA0361;-	PA14_RS01920;PA14_04730	false	false	52	52	1	1	1	0	0	0	5.26735	NaN	0	0	0	0	1	1	1	1	1	1	1	1	1	1	1	1	1	1	1	1	1	1	1	1	1	1	1	1	1	1	1	1
1185	2578	amidohydrolase	PA14_RS13440;PA14_32950	PA2448;-	PA14_RS13440;PA14_32950	false	false	52	52	1	1	1	0	0	0	5.26735	NaN	0	0	0	0	1	1	1	1	1	1	1	1	1	1	1	1	1	1	1	1	1	1	1	1	1	1	1	1	1	1	1	1
1186	2580	chromosome segregation protein SMC	-	-	NT47_RS23090;-	false	false	1	1	0.703	0.320458	0.734059	0.827569	-0.494228	-0.134269	6.079	5.25143	-0.494228	-0.134269	0.34	0.349	0	0	0	0	0	0	0	0	0	0	0	0	0	0	0	0	0	0	0	0	0	0	0	0	0	0	0	0
1187	2581	urease subunit alpha	PA14_RS26305;PA14_64390	PA4868;-	PA14_RS26305;PA14_64390	false	false	52	52	1	1	1	0	0	0	5.26735	NaN	0	0	0	0	1	1	1	1	1	1	1	1	1	1	1	1	1	1	1	1	1	1	1	1	1	1	1	1	1	1	1	1
1188	2583	Na+/H+ antiporter	PA14_RS06825;PA14_17010	PA3660;-	PA14_RS06825;PA14_17010	false	false	51	51	0.115194	0.897242	0.170482	-3.30929	0.93857	0.768321	5.20371	8.513	0.93857	0.768321	0.1357	0.1393	1	1	1	1	1	1	1	1	1	1	1	1	1	1	1	1	1	1	1	1	1	1	1	1	1	1	1	1
1189	2584	hydantoinase	-	-	NT56_RS17010;-	false	false	1	1	0.115194	0.897242	0.278294	-2.62686	0.93857	0.555496	2.691	5.31786	0.93857	0.555496	0.131	0.1396	0	0	0	0	0	0	0	1	0	0	0	0	0	0	0	0	0	0	0	0	0	0	0	0	0	0	0	0
1190	2587	hypothetical protein	-	-	P998_RS17725;P998_02269	false	false	2	2	0.317094	0.699661	0.557969	-1.018	0.498812	0.25339	4.2885	5.3065	0.498812	0.25339	0.3135	0.3034	0	0	0	0	0	0	0	0	1	0	0	0	0	0	0	0	0	0	0	0	0	0	0	0	0	0	0	0
1191	2596	penicillin-binding protein 3	PA14_RS23405;PA14_57425	PA4418;-	PA14_RS23405;PA14_57425	false	false	52	52	1	1	1	0	0	0	5.26735	NaN	0	0	0	0	1	1	1	1	1	1	1	1	1	1	1	1	1	1	1	1	1	1	1	1	1	1	1	1	1	1	1	1
1192	2597	K+/H+ antiporter NhaP2	PA14_RS27090;PA14_66380	PA5021;-	PA14_RS27090;PA14_66380	false	false	52	52	1	1	1	0	0	0	5.26735	NaN	0	0	0	0	1	1	1	1	1	1	1	1	1	1	1	1	1	1	1	1	1	1	1	1	1	1	1	1	1	1	1	1
1193	2599	NTPase KAP	-	-	PABE171_RS03160;PABE171_0607	false	false	1	1	0.526562	0.5	0.997882	-0.00647059	-0.30103	0.000920888	5.261	5.26747	-0.30103	0.000920888	0.4747	0.5185	0	0	0	0	0	0	0	0	0	0	0	0	0	0	0	0	0	0	0	0	0	0	0	0	0	0	1	0
1194	2603	copper resistance protein CopA	-	-	NS42_RS08090;-	false	false	2	2	0.912474	0.0953412	0.2283	2.08172	-1.02072	-0.641494	7.269	5.18728	-1.02072	-0.641494	0.1023	0.1332	0	0	0	0	0	0	0	0	0	0	0	0	0	0	0	0	0	0	0	0	0	0	0	0	0	0	0	0
1195	2606	peptidase C13	PA14_RS04810;PA14_11900	PA4016;-	PA14_RS04810;PA14_11900	false	false	49	49	0.437628	0.577786	0.996454	0.00638095	0.358895	-0.00154288	5.26771	5.26133	0.358895	-0.00154288	0.435	0.5094	1	1	1	1	1	1	1	1	1	1	1	1	1	1	1	1	1	1	1	1	0	1	1	1	1	1	1	1
1196	2607	transcriptional regulator	PA14_RS24110;PA14_59070	-	PA14_RS24110;PA14_59070	true	false	32	30	0.540571	0.466787	0.884565	-0.0983576	-0.330881	0.0532701	5.22573	5.32409	-0.330881	0.0532701	0.4618	0.4359	0	1	1	1	0	0	0	0	1	1	1	1	0	0	0	1	0	1	1	1	1	0	0	0	1	0	1	1
1197	2608	membrane protein	PA14_RS12965;PA14_31680	PA2543;-	PA14_RS12965;PA14_31680	false	false	51	51	0.115194	0.897242	0.170482	-3.30929	0.93857	0.768321	5.20371	8.513	0.93857	0.768321	0.1357	0.1393	1	1	1	1	1	1	1	1	1	1	1	1	1	1	1	1	1	1	1	1	1	1	1	1	1	1	1	1
1198	2609	DNA helicase II	-	-	NT47_RS06270;-	false	false	1	1	0.703	0.320458	0.734059	0.827569	-0.494228	-0.134269	6.079	5.25143	-0.494228	-0.134269	0.34	0.349	0	0	0	0	0	0	0	0	0	0	0	0	0	0	0	0	0	0	0	0	0	0	0	0	0	0	0	0
1199	2610	hypothetical protein	-	-	NQ81_RS01535;-	false	false	1	1	0.320458	0.703	0.566684	-1.39416	0.494228	0.246659	3.9	5.29416	0.494228	0.246659	0.3477	0.3494	0	0	0	0	0	0	0	0	0	0	0	0	0	0	0	0	0	0	1	0	0	0	0	0	0	0	0	0
1200	2611	hypothetical protein	-	-	NQ81_RS01615;-	false	false	1	1	0.320458	0.703	0.566684	-1.39416	0.494228	0.246659	3.9	5.29416	0.494228	0.246659	0.3477	0.3494	0	0	0	0	0	0	0	0	0	0	0	0	0	0	0	0	0	0	1	0	0	0	0	0	0	0	0	0
1201	2613	hypothetical protein	-	-	L683_RS56170;L683_19255	false	false	1	1	0.0626977	0.945106	0.203929	-3.07141	1.20275	0.690521	2.255	5.32641	1.20275	0.690521	0.0322	0.0355	0	0	1	0	0	0	0	0	0	0	0	0	0	0	0	0	0	0	0	0	0	0	0	0	0	0	0	0
1202	2616	protein translocase component YidC	PA14_RS29885;PA14_73410	PA5568;-	PA14_RS29885;PA14_73410	false	false	52	52	1	1	1	0	0	0	5.26735	NaN	0	0	0	0	1	1	1	1	1	1	1	1	1	1	1	1	1	1	1	1	1	1	1	1	1	1	1	1	1	1	1	1
1203	2617	hypothetical protein	-	-	Q012_RS25865;Q012_03788	false	false	1	1	0.605082	0.420782	0.909186	0.278	-0.375943	-0.0413471	5.54	5.262	-0.375943	-0.0413471	0.4281	0.438	0	0	0	0	0	0	0	0	0	0	0	0	0	0	0	0	0	0	0	0	0	0	0	0	0	0	0	0
1204	2619	sodium-independent anion transporter	PA14_RS17555;PA14_43200	PA1647;-	PA14_RS17555;PA14_43200	false	false	52	52	1	1	1	0	0	0	5.26735	NaN	0	0	0	0	1	1	1	1	1	1	1	1	1	1	1	1	1	1	1	1	1	1	1	1	1	1	1	1	1	1	1	1
1205	2624	chromosome segregation protein SMC	-	-	NS86_RS24865;-	false	false	3	3	0.406918	0.608237	0.961474	-0.0693469	0.390493	0.0170625	5.202	5.27135	0.390493	0.0170625	0.3966	0.4939	0	0	0	0	1	0	0	0	0	0	0	0	0	0	0	0	0	0	0	0	0	0	1	0	0	0	0	0
1206	2626	ABC transporter ATP-binding protein	-	-	L683_RS44950;L683_09090	false	false	1	1	0.0626977	0.945106	0.203929	-3.07141	1.20275	0.690521	2.255	5.32641	1.20275	0.690521	0.0322	0.0355	0	0	1	0	0	0	0	0	0	0	0	0	0	0	0	0	0	0	0	0	0	0	0	0	0	0	0	0
1207	2628	FAD-binding dehydrogenase	PA14_RS14470;PA14_35590	PA2243;-	PA14_RS14470;PA14_35590	false	false	44	44	0.00234265	0.997836	0.00220382	-2.71068	2.63029	2.65682	4.85032	7.561	2.63029	2.65682	0.0011	0.0013	1	1	1	1	1	0	1	1	1	1	1	1	1	1	1	1	1	1	1	1	1	1	1	1	1	1	1	1
1208	2629	terminase	-	-	Q009_RS22225;Q009_02931	false	true	7	7	0.0857592	0.918364	0.152023	-1.39037	1.06672	0.81809	4.06414	5.45451	1.06672	0.81809	0.0859	0.0729	0	0	0	0	0	0	0	1	0	0	0	1	1	1	0	0	0	0	0	0	0	1	0	0	0	0	0	0
1209	2633	sigma-54-dependent Fis family transcriptional regulator	PA14_RS15980;PA14_39360	PA1945;-	PA14_RS15980;PA14_39360	false	false	50	50	0.189347	0.823268	0.330876	-1.68444	0.722742	0.480335	5.20256	6.887	0.722742	0.480335	0.1903	0.1763	1	1	1	1	1	1	1	1	1	1	1	1	1	1	1	1	1	1	1	1	1	1	1	1	1	1	0	1
1210	2634	chromosome segregation protein SMC	-	-	PABE173_RS29230;PABE173_5402	false	false	1	1	0.193189	0.824547	0.384173	-2.11298	0.714017	0.415473	3.195	5.30798	0.714017	0.415473	0.2293	0.2301	0	0	0	0	0	0	0	0	0	0	0	0	1	0	0	0	0	0	0	0	0	0	0	0	0	0	0	0
1211	2635	DNA methyltransferase	-	-	L683_RS56055;L683_19140	false	false	1	1	0.0626977	0.945106	0.203929	-3.07141	1.20275	0.690521	2.255	5.32641	1.20275	0.690521	0.0322	0.0355	0	0	1	0	0	0	0	0	0	0	0	0	0	0	0	0	0	0	0	0	0	0	0	0	0	0	0	0
1212	2637	type II secretion protein	PA14_RS12030;PA14_29490	PA2677;-	PA14_RS12030;PA14_29490	false	false	52	52	1	1	1	0	0	0	5.26735	NaN	0	0	0	0	1	1	1	1	1	1	1	1	1	1	1	1	1	1	1	1	1	1	1	1	1	1	1	1	1	1	1	1
1213	2640	sodium/hydrogen exchanger	-	-	ACP77_RS15375;-	false	false	4	4	0.917858	0.0874757	0.177994	1.67663	-1.05811	-0.749595	6.815	5.13837	-1.05811	-0.749595	0.0835	0.094	0	0	0	0	0	0	0	0	0	0	0	0	0	0	0	0	0	0	0	0	0	0	0	0	0	0	0	0
1214	2642	integrase	-	-	NQ67_RS01825;-	false	false	1	1	0.92866	0.0808686	0.103292	3.918	-1.09222	-0.985933	9.11	5.192	-1.09222	-0.985933	0.0776	0.0812	0	0	0	0	0	0	0	0	0	0	0	0	0	0	0	0	0	0	0	0	0	0	0	0	0	0	0	0
1215	2646	multidrug MFS transporter	PA14_RS15260;PA14_37510	PA2086;-	PA14_RS15260;PA14_37510	false	false	103	52	1	1	1	0	0	0	5.26735	NaN	0	0	0	0	2	2	2	2	2	2	2	2	2	2	2	2	2	2	2	2	2	2	2	2	2	2	2	2	2	2	2	2
1216	2653	imidazolonepropionase	-	-	Q012_RS10155;Q012_00549	false	false	13	13	0.950361	0.0518442	0.188271	1.00826	-1.2853	-0.725217	6.02354	5.01528	-1.2853	-0.725217	0.0481	0.0922	0	0	0	0	0	0	0	0	1	1	0	0	0	0	0	1	0	0	0	0	0	0	0	0	0	0	1	0
1217	2658	terminase	-	-	Q009_RS27640;Q009_04060	false	false	3	3	0.708653	0.304953	0.567765	0.818898	-0.515767	-0.245831	6.039	5.2201	-0.515767	-0.245831	0.3041	0.2801	0	0	0	0	0	0	0	0	0	0	0	0	0	0	0	0	0	0	0	0	0	1	0	0	0	1	0	0
1218	2659	ATPase	-	-	NT81_RS14835;-	false	false	1	1	0.945106	0.0626977	0.0763877	4.25141	-1.20275	-1.11698	9.437	5.18559	-1.20275	-1.11698	0.0371	0.0372	0	0	0	0	0	0	0	0	0	0	0	0	0	0	0	0	0	0	0	0	0	0	0	0	0	0	0	0
1219	2660	chromosome segregation protein SMC	-	-	PACI27_RS15215;PACI27_2931	false	false	3	3	0.468718	0.546863	0.80569	-0.353048	0.329089	0.0938323	4.93467	5.28771	0.329089	0.0938323	0.4581	0.4273	0	0	0	0	0	0	0	0	0	0	0	1	0	0	0	0	0	0	0	0	0	0	0	0	0	0	0	0
1220	2661	nitrate reductase	PA14_RS02505;PA14_06230	PA0476;-	PA14_RS02505;PA14_06230	false	false	52	52	1	1	1	0	0	0	5.26735	NaN	0	0	0	0	1	1	1	1	1	1	1	1	1	1	1	1	1	1	1	1	1	1	1	1	1	1	1	1	1	1	1	1
1221	2662	potassium-transporting ATPase subunit KdpA	-	-	L683_RS42830;L683_08300	false	false	1	1	0.0626977	0.945106	0.203929	-3.07141	1.20275	0.690521	2.255	5.32641	1.20275	0.690521	0.0322	0.0355	0	0	1	0	0	0	0	0	0	0	0	0	0	0	0	0	0	0	0	0	0	0	0	0	0	0	0	0
1222	2663	DNA methylase	-	-	NR50_RS26525;-	false	false	1	1	0.655343	0.369508	0.829501	0.524745	-0.432376	-0.0811833	5.782	5.25725	-0.432376	-0.0811833	0.3748	0.3808	0	0	0	0	0	0	0	0	0	0	0	0	0	0	0	0	0	0	0	0	0	0	0	0	0	0	0	0
1223	2669	hemolysin activation/secretion protein	PA14_RS24995;PA14_61190	PA4624;-	PA14_RS24995;PA14_61190	false	false	52	52	1	1	1	0	0	0	5.26735	NaN	0	0	0	0	1	1	1	1	1	1	1	1	1	1	1	1	1	1	1	1	1	1	1	1	1	1	1	1	1	1	1	1
1224	2673	fumarate reductase/succinate dehydrogenase flavoprotein subunit	PA14_RS14205;PA14_34900	PA2298;-	PA14_RS14205;PA14_34900	false	false	48	48	0.297265	0.714515	0.609715	-0.640417	0.526856	0.214873	5.21808	5.8585	0.526856	0.214873	0.2861	0.2938	1	1	1	1	1	1	1	1	1	1	1	1	1	1	1	1	0	1	1	1	0	1	1	1	1	1	1	1
1225	2674	carbamoyltransferase	PA14_RS15350;PA14_37745	PA2069;-	PA14_RS15350;PA14_37745	false	false	52	52	1	1	1	0	0	0	5.26735	NaN	0	0	0	0	1	1	1	1	1	1	1	1	1	1	1	1	1	1	1	1	1	1	1	1	1	1	1	1	1	1	1	1
1226	2675	acetolactate synthase 3 catalytic subunit	PA14_RS25405;PA14_62160	PA4696;-	PA14_RS25405;PA14_62160	false	false	52	52	1	1	1	0	0	0	5.26735	NaN	0	0	0	0	1	1	1	1	1	1	1	1	1	1	1	1	1	1	1	1	1	1	1	1	1	1	1	1	1	1	1	1
1227	2676	hypothetical protein	-	-	NT80_RS25595;-	false	false	3	3	0.347357	0.667025	0.831946	-0.304585	0.459225	0.0799051	4.98033	5.28492	0.459225	0.0799051	0.3414	0.4366	0	0	1	0	0	0	0	0	0	0	0	0	0	0	0	0	0	0	1	0	0	0	0	0	0	0	0	0
1228	2677	C4-dicarboxylate transporter	PA14_RS21505;PA14_52810	PA0886;-	PA14_RS21505;PA14_52810	false	false	101	52	1	1	1	0	0	0	5.26735	NaN	0	0	0	0	2	2	2	2	2	2	2	2	2	2	2	2	1	2	2	2	2	2	2	2	1	2	2	2	2	2	1	2
1229	2678	hypothetical protein	-	-	NS72_RS01120;-	false	false	1	1	0.897242	0.115194	0.170482	3.30929	-0.93857	-0.768321	8.513	5.20371	-0.93857	-0.768321	0.1357	0.137	0	0	0	0	0	0	0	0	0	0	0	0	0	0	0	0	0	0	0	0	0	0	0	0	0	0	0	0
1230	2681	hypothetical protein	-	-	NS96_RS01820;-	false	false	1	1	0.102758	0.908672	0.274161	-2.64929	0.988183	0.561994	2.669	5.31829	0.988183	0.561994	0.1126	0.1151	0	0	0	0	0	0	1	0	0	0	0	0	0	0	0	0	0	0	0	0	0	0	0	0	0	0	0	0
1231	2683	hypothetical protein	-	-	NQ67_RS32065;-	false	false	1	1	0.92866	0.0808686	0.103292	3.918	-1.09222	-0.985933	9.11	5.192	-1.09222	-0.985933	0.0776	0.0812	0	0	0	0	0	0	0	0	0	0	0	0	0	0	0	0	0	0	0	0	0	0	0	0	0	0	0	0
1232	2689	group II intron reverse transcriptase/maturase	PA14_RS03000;PA14_07480	-	PA14_RS03000;PA14_07480	false	false	9	8	0.337798	0.671422	0.656681	-0.411977	0.471343	0.182646	4.91875	5.33073	0.471343	0.182646	0.3352	0.3334	0	0	0	1	0	0	0	0	0	0	0	1	1	0	0	0	0	0	0	0	0	0	0	0	0	0	0	1
1233	2690	cytochrome c oxidase accessory protein CcoG	PA14_RS04245;PA14_10540	PA4131;-	PA14_RS04245;PA14_10540	false	false	48	48	0.49315	0.520541	0.805857	-0.308646	0.307021	0.0937422	5.2436	5.55225	0.307021	0.0937422	0.4876	0.4001	1	1	1	1	1	1	1	1	1	1	1	0	1	1	1	1	1	1	1	1	0	1	0	1	1	1	1	1
1234	2691	urocanate hydratase	PA14_RS27480;PA14_67350	PA5100;-	PA14_RS27480;PA14_67350	false	false	52	52	1	1	1	0	0	0	5.26735	NaN	0	0	0	0	1	1	1	1	1	1	1	1	1	1	1	1	1	1	1	1	1	1	1	1	1	1	1	1	1	1	1	1
1235	2692	chromosome partitioning protein ParB	-	-	NT47_RS06125;-	false	false	1	1	0.703	0.320458	0.734059	0.827569	-0.494228	-0.134269	6.079	5.25143	-0.494228	-0.134269	0.34	0.349	0	0	0	0	0	0	0	0	0	0	0	0	0	0	0	0	0	0	0	0	0	0	0	0	0	0	0	0
1236	2699	pyruvate dehydrogenase	PA14_RS28500;PA14_69925	PA5297;-	PA14_RS28500;PA14_69925	false	false	50	50	0.823268	0.189347	0.377467	1.5302	-0.722742	-0.423121	5.3262	3.796	-0.722742	-0.423121	0.1876	0.1903	1	1	1	1	1	1	1	1	1	1	1	1	0	1	1	1	1	1	1	1	0	1	1	1	1	1	1	1
1237	2700	transposase	-	-	Q009_RS32165;Q009_05008	false	false	9	9	0.877187	0.1278	0.322484	0.871085	-0.89347	-0.491491	5.98767	5.11658	-0.89347	-0.491491	0.1317	0.1663	0	0	0	0	0	0	0	0	0	0	0	0	1	0	0	0	0	1	0	0	0	1	0	0	0	0	0	0
1238	2701	group II intron reverse transcriptase/maturase	-	-	NS72_RS29505;-	false	false	2	2	0.603228	0.415223	0.725787	0.61012	-0.381718	-0.139191	5.854	5.24388	-0.381718	-0.139191	0.393	0.3503	0	0	0	0	0	0	0	0	0	0	0	0	1	0	0	0	0	0	0	0	0	0	0	0	0	0	0	0
1239	2702	membrane protein	PA14_RS07720;PA14_19310	PA3465;-	PA14_RS07720;PA14_19310	false	false	50	50	0.949669	0.0554604	0.153244	2.46048	-1.25602	-0.814617	5.36198	2.9015	-1.25602	-0.814617	0.0508	0.0659	1	1	1	1	1	1	0	1	1	1	1	0	1	1	1	1	1	1	1	1	1	1	1	1	1	1	1	1
1240	2703	membrane protein	PA14_RS15840;PA14_39020	PA1972;-	PA14_RS15840;PA14_39020	false	false	52	52	1	1	1	0	0	0	5.26735	NaN	0	0	0	0	1	1	1	1	1	1	1	1	1	1	1	1	1	1	1	1	1	1	1	1	1	1	1	1	1	1	1	1
1241	2705	thiamin biosynthesis protein	-	-	NT11_RS26755;-	false	false	1	1	0.135794	0.878202	0.285721	-2.5871	0.867119	0.544058	2.73	5.3171	0.867119	0.544058	0.1516	0.1608	0	0	0	0	0	0	0	0	1	0	0	0	0	0	0	0	0	0	0	0	0	0	0	0	0	0	0	0
1242	2706	fused response regulator/phosphatase	PA14_RS08355;PA14_20780	PA3346;-	PA14_RS08355;PA14_20780	false	false	52	52	1	1	1	0	0	0	5.26735	NaN	0	0	0	0	1	1	1	1	1	1	1	1	1	1	1	1	1	1	1	1	1	1	1	1	1	1	1	1	1	1	1	1
1243	2709	hypothetical protein	PA14_RS06545;PA14_16330	PA3716;-	PA14_RS06545;PA14_16330	false	false	51	51	0.102758	0.908672	0.143718	-3.52545	0.988183	0.84249	5.19955	8.725	0.988183	0.84249	0.1152	0.1196	1	1	1	1	1	1	1	1	1	1	1	1	1	1	1	1	1	1	1	1	1	1	1	1	1	1	1	1
1244	2711	single-stranded-DNA-specific exonuclease RecJ	PA14_RS06500;PA14_16220	PA3725;-	PA14_RS06500;PA14_16220	false	false	52	52	1	1	1	0	0	0	5.26735	NaN	0	0	0	0	1	1	1	1	1	1	1	1	1	1	1	1	1	1	1	1	1	1	1	1	1	1	1	1	1	1	1	1
1245	2712	proline--tRNA ligase	PA14_RS21125;PA14_51900	PA0956;-	PA14_RS21125;PA14_51900	false	false	51	51	0.824547	0.193189	0.384173	2.11298	-0.714017	-0.415473	5.30798	3.195	-0.714017	-0.415473	0.2293	0.2438	1	1	1	1	1	1	1	1	1	1	1	1	0	1	1	1	1	1	1	1	1	1	1	1	1	1	1	1
1246	2713	hypothetical protein	-	-	Q009_RS39010;Q009_06418	false	false	2	2	0.415223	0.603228	0.7809	-0.48396	0.381718	0.107404	4.802	5.28596	0.381718	0.107404	0.4036	0.4331	0	0	0	0	0	0	0	0	0	0	0	0	0	0	0	0	0	0	0	0	0	1	0	0	0	1	0	0
1247	2716	hypothetical protein	-	-	P998_RS14375;P998_01581	false	false	1	1	0.679542	0.344657	0.80835	0.59102	-0.462613	-0.0924004	5.847	5.25598	-0.462613	-0.0924004	0.3711	0.3733	0	0	0	0	0	0	0	0	0	0	0	0	0	0	0	0	0	0	0	0	0	0	0	0	0	0	0	0
1248	2717	cell division protein	PA14_RS27170;PA14_66580	PA5037;-	PA14_RS27170;PA14_66580	false	false	52	52	1	1	1	0	0	0	5.26735	NaN	0	0	0	0	1	1	1	1	1	1	1	1	1	1	1	1	1	1	1	1	1	1	1	1	1	1	1	1	1	1	1	1
1249	2718	amino acid permease	PA14_RS15305;PA14_37630	PA2079;-	PA14_RS15305;PA14_37630	false	false	53	52	1	1	1	0	0	0	5.26735	NaN	0	0	0	0	1	1	1	1	1	1	1	1	1	1	1	1	1	1	1	1	1	1	1	1	1	1	1	1	2	1	1	1
1250	2725	type VI secretion protein	PA14_RS00360;PA14_00830	PA0071;-	PA14_RS00360;PA14_00830	false	false	52	52	1	1	1	0	0	0	5.26735	NaN	0	0	0	0	1	1	1	1	1	1	1	1	1	1	1	1	1	1	1	1	1	1	1	1	1	1	1	1	1	1	1	1
1251	2726	N-acetyl-D-glucosamine phosphotransferase system transporter	PA14_RS06315;PA14_15780	PA3761;-	PA14_RS06315;PA14_15780	false	false	52	52	1	1	1	0	0	0	5.26735	NaN	0	0	0	0	1	1	1	1	1	1	1	1	1	1	1	1	1	1	1	1	1	1	1	1	1	1	1	1	1	1	1	1
1252	2732	AMP-binding protein	-	-	L683_RS0133430;-	false	false	1	1	0.0626977	0.945106	0.203929	-3.07141	1.20275	0.690521	2.255	5.32641	1.20275	0.690521	0.0322	0.0355	0	0	1	0	0	0	0	0	0	0	0	0	0	0	0	0	0	0	0	0	0	0	0	0	0	0	0	0
1253	2733	membrane protein	PA14_RS22545;PA14_55320	PA0696;-	PA14_RS22545;PA14_55320	false	false	52	52	1	1	1	0	0	0	5.26735	NaN	0	0	0	0	1	1	1	1	1	1	1	1	1	1	1	1	1	1	1	1	1	1	1	1	1	1	1	1	1	1	1	1
1254	2735	hypothetical protein	-	-	NT47_RS12940;-	false	false	1	1	0.703	0.320458	0.734059	0.827569	-0.494228	-0.134269	6.079	5.25143	-0.494228	-0.134269	0.34	0.349	0	0	0	0	0	0	0	0	0	0	0	0	0	0	0	0	0	0	0	0	0	0	0	0	0	0	0	0
1255	2739	hypothetical protein	-	-	Q009_RS27570;Q009_04045	false	true	13	11	0.866311	0.138582	0.189755	1.0655	-0.858295	-0.721807	6.10745	5.04195	-0.858295	-0.721807	0.1393	0.0959	0	0	2	0	0	0	0	0	0	2	0	0	0	0	0	0	0	0	0	1	0	1	0	0	0	1	0	0
1256	2740	hypothetical protein	-	-	JF43_RS12015;JF43_12105	false	true	1	1	0.768203	0.252606	0.684151	0.990706	-0.597556	-0.164848	6.239	5.24829	-0.597556	-0.164848	0.2907	0.2932	0	0	0	0	0	0	0	0	0	0	0	0	0	0	0	0	0	0	0	0	0	0	0	0	0	0	0	0
1257	2742	amidase	PA14_RS04055;PA14_10040	PA4163;-	PA14_RS04055;PA14_10040	false	false	51	51	0.0548941	0.952121	0.041044	-4.87643	1.26047	1.38675	5.17357	10.05	1.26047	1.38675	0.0208	0.0245	1	1	1	1	1	1	1	1	1	1	1	1	1	1	1	1	1	1	1	1	1	1	1	1	1	1	1	1
1258	2743	membrane protein	PA14_RS18255;PA14_44910	PA1510;-	PA14_RS18255;PA14_44910	false	false	51	51	0.553007	0.473438	0.922567	0.236902	-0.324737	-0.035002	5.2719	5.035	-0.324737	-0.035002	0.463	0.4761	1	1	1	1	1	1	1	1	1	1	1	1	1	1	1	1	1	1	1	1	1	1	1	1	0	1	1	1
1259	2744	type IVB pilus formation outer membrane protein, R64 PilN family	PA14_RS24185;PA14_59250	-	-	false	false	31	31	0.559301	0.448067	0.862521	-0.118117	-0.348658	0.0642302	5.21965	5.33776	-0.348658	0.0642302	0.4481	0.4284	0	1	1	1	0	0	0	0	1	1	1	1	1	0	0	1	0	1	1	1	0	0	0	0	1	0	1	1
1260	2747	tail fiber	-	-	NQ73_RS22575;-	false	false	1	1	0.5	0.526562	0.937531	-0.19102	0.30103	0.0280144	5.08	5.27102	0.30103	0.0280144	0.4854	0.4917	0	0	0	0	0	0	0	0	0	0	0	0	0	0	0	0	0	0	0	0	0	0	0	0	0	1	0	0
1261	2750	mercuric reductase	PA14_RS06170;PA14_15460	-	PA14_RS06170;PA14_15460	false	false	8	8	0.301556	0.707224	0.586173	-0.504307	0.520632	0.231974	4.84063	5.34493	0.520632	0.231974	0.2959	0.2958	0	0	0	1	0	0	0	1	0	0	0	0	1	0	0	0	0	0	0	0	1	0	0	0	0	0	0	0
1262	2751	hypothetical protein	PA14_RS00035;PA14_00080	PA0007;-	PA14_RS00035;PA14_00080	false	false	52	51	0.679542	0.344657	0.628769	1.17698	-0.462613	-0.201509	5.28998	4.113	-0.462613	-0.201509	0.3642	0.3804	1	1	1	1	1	1	1	1	1	1	1	1	1	1	1	1	1	1	1	0	1	1	1	1	1	1	1	1
1263	2753	nitrite reductase	PA14_RS02710;PA14_06750	PA0519;-	PA14_RS02710;PA14_06750	false	false	52	52	1	1	1	0	0	0	5.26735	NaN	0	0	0	0	1	1	1	1	1	1	1	1	1	1	1	1	1	1	1	1	1	1	1	1	1	1	1	1	1	1	1	1
1264	2754	hypothetical protein	-	-	NQ73_RS31920;-	false	false	1	1	0.5	0.526562	0.937531	-0.19102	0.30103	0.0280144	5.08	5.27102	0.30103	0.0280144	0.4854	0.4917	0	0	0	0	0	0	0	0	0	0	0	0	0	0	0	0	0	0	0	0	0	0	0	0	0	1	0	0
1265	2755	hypothetical protein	-	-	ACP77_RS18165;-	false	false	1	1	0.952121	0.0548941	0.041044	4.87643	-1.26047	-1.38675	10.05	5.17357	-1.26047	-1.38675	0.0208	0.0229	0	0	0	0	0	0	0	0	0	0	0	0	0	0	0	0	0	0	0	0	0	0	0	0	0	0	0	0
1266	2756	hypothetical protein	-	-	ACP77_RS03070;-	false	true	11	10	0.995939	0.0043489	0.00376049	2.36012	-2.36162	-2.42476	7.1736	4.81348	-2.36162	-2.42476	0.0038	0.0032	0	0	0	0	0	0	0	0	0	1	0	0	0	0	0	0	0	0	0	0	0	0	0	0	0	0	0	2
1267	2758	chemotaxis transducer	PA14_RS12865;PA14_31400	PA2561;-	PA14_RS12865;PA14_31400	false	false	50	50	0.835337	0.176732	0.367579	1.56192	-0.752684	-0.43465	5.32742	3.7655	-0.752684	-0.43465	0.1753	0.185	1	1	1	1	1	1	1	1	1	1	1	0	1	1	1	1	1	1	1	1	0	1	1	1	1	1	1	1
1268	2759	potassium efflux transporter	PA14_RS29635;PA14_72800	PA5518;-	PA14_RS29635;PA14_72800	false	false	52	52	1	1	1	0	0	0	5.26735	NaN	0	0	0	0	1	1	1	1	1	1	1	1	1	1	1	1	1	1	1	1	1	1	1	1	1	1	1	1	1	1	1	1
1269	2762	type IV-A pilus assembly ATPase PilB	PA14_RS23955;PA14_58750	PA4526;-	PA14_RS23955;PA14_58750	false	false	51	51	0.824547	0.193189	0.384173	2.11298	-0.714017	-0.415473	5.30798	3.195	-0.714017	-0.415473	0.2293	0.2438	1	1	1	1	1	1	1	1	1	1	1	1	0	1	1	1	1	1	1	1	1	1	1	1	1	1	1	1
1270	2763	hypothetical protein	-	-	NT05_RS02440;-	false	false	1	1	0.446993	0.579218	0.850544	-0.459176	0.349699	0.0703031	4.817	5.27618	0.349699	0.0703031	0.4394	0.4547	0	0	0	0	0	0	0	0	0	0	0	0	0	0	0	0	0	0	0	0	0	0	0	1	0	0	0	0
1271	2766	DNA methylase N-4	-	-	ACP77_RS15145;-	false	false	2	2	0.919801	0.0875262	0.122612	2.65528	-1.05786	-0.911466	7.8205	5.16522	-1.05786	-0.911466	0.0944	0.0698	0	0	0	0	0	0	0	0	0	0	0	0	0	0	0	0	0	0	0	0	0	0	0	0	0	0	0	0
1272	2768	hypothetical protein	-	-	Q009_RS28740;Q009_04292	false	true	17	13	0.542076	0.466317	0.879084	0.11759	-0.331319	-0.0559698	5.35554	5.23795	-0.331319	-0.0559698	0.4594	0.434	0	0	1	0	0	0	0	0	0	0	0	1	1	0	0	0	0	1	0	1	1	4	0	0	0	0	0	0
1273	2769	phage protein gp28	-	-	ACP77_RS02990;-	false	true	17	16	0.936577	0.0659271	0.1072	1.15316	-1.18094	-0.969805	6.06569	4.91253	-1.18094	-0.969805	0.0626	0.0555	0	0	0	0	0	0	0	1	0	1	0	1	1	0	0	0	0	0	0	1	0	0	0	0	0	0	0	1
1274	2770	RNA helicase	PA14_RS11065;PA14_27370	PA2840;-	PA14_RS11065;PA14_27370	false	false	52	52	1	1	1	0	0	0	5.26735	NaN	0	0	0	0	1	1	1	1	1	1	1	1	1	1	1	1	1	1	1	1	1	1	1	1	1	1	1	1	1	1	1	1
1275	2771	dynamin family protein	-	-	NT47_RS23060;-	false	false	1	1	0.703	0.320458	0.734059	0.827569	-0.494228	-0.134269	6.079	5.25143	-0.494228	-0.134269	0.34	0.349	0	0	0	0	0	0	0	0	0	0	0	0	0	0	0	0	0	0	0	0	0	0	0	0	0	0	0	0
1276	2772	membrane protein	-	-	NT80_RS07720;-	false	false	2	2	0.810653	0.202501	0.357277	1.59552	-0.693573	-0.446995	6.8015	5.20598	-0.693573	-0.446995	0.212	0.1973	0	0	0	0	0	0	0	0	0	0	0	0	0	0	0	0	0	0	0	0	0	0	0	1	0	0	0	0
1277	2774	peptidase	-	-	PABE171_RS08765;PABE171_1696	false	false	1	1	0.526562	0.5	0.997882	-0.00647059	-0.30103	0.000920888	5.261	5.26747	-0.30103	0.000920888	0.4747	0.5185	0	0	0	0	0	0	0	0	0	0	0	0	0	0	0	0	0	0	0	0	0	0	0	0	0	0	1	0
1278	2776	hypothetical protein	PA14_RS18895;PA14_46540	-	PA14_RS18895;PA14_46540	false	false	3	3	0.104577	0.902364	0.234358	-1.69514	0.980564	0.630121	3.67	5.36514	0.980564	0.630121	0.1019	0.1159	0	0	0	1	0	0	0	0	0	0	0	1	0	0	0	0	0	0	0	0	0	0	0	0	0	0	0	0
1279	2780	Fis family transcriptional regulator	PA14_RS24760;PA14_60600	PA4581;-	PA14_RS24760;PA14_60600	false	false	104	52	1	1	1	0	0	0	5.26735	NaN	0	0	0	0	2	2	2	2	2	2	2	2	2	2	2	2	2	2	2	2	2	2	2	2	2	2	2	2	2	2	2	2
1280	2781	AraC family transcriptional regulator	PA14_RS09775;PA14_24140	PA1586;-	PA14_RS09775;PA14_24140	false	false	101	52	1	1	1	0	0	0	5.26735	NaN	0	0	0	0	2	2	2	2	1	2	2	2	2	2	2	2	2	2	1	2	2	2	2	2	2	2	2	2	2	2	2	2
1281	2789	RND transporter	-	-	Q009_RS13375;Q009_01102	false	false	4	4	0.181403	0.827511	0.335259	-1.20477	0.741357	0.474619	4.15525	5.36002	0.741357	0.474619	0.1809	0.1742	0	0	0	0	0	0	0	0	0	0	0	0	1	0	0	0	0	1	0	0	0	1	0	0	0	1	0	0
1282	2793	DNA restriction methylase	-	-	Q011_RS20135;Q011_02564	false	false	1	1	0.297	0.72564	0.544685	-1.47369	0.527244	0.263855	3.822	5.29569	0.527244	0.263855	0.3254	0.3299	0	0	0	0	0	0	0	0	0	0	0	0	0	0	0	0	0	1	0	0	0	0	0	0	0	0	0	0
1283	2796	AMP-binding protein	PA14_RS12890;PA14_31470	PA2557;-	PA14_RS12890;PA14_31470	false	false	52	51	0.102758	0.908672	0.143718	-3.52545	0.988183	0.84249	5.19955	8.725	0.988183	0.84249	0.1152	0.1196	1	1	2	1	1	1	1	1	1	1	1	1	1	1	1	1	1	1	1	1	1	1	1	1	1	1	1	1
1284	2799	hypothetical protein	-	-	Q000_RS0106355;-	false	false	1	1	0.158784	0.85681	0.307161	-2.47596	0.799192	0.512634	2.839	5.31496	0.799192	0.512634	0.1896	0.1988	0	0	0	0	0	0	0	0	0	0	1	0	0	0	0	0	0	0	0	0	0	0	0	0	0	0	0	0
1285	2800	DNA methyltransferase	-	-	NT80_RS00635;-	false	true	8	7	0.378919	0.631237	0.86758	-0.163498	0.421454	0.0616907	5.12586	5.28936	0.421454	0.0616907	0.3751	0.4398	0	0	0	0	1	0	0	0	1	0	0	0	1	0	0	0	0	0	0	1	0	0	0	0	0	0	0	0
1286	2802	NAD-dependent malic enzyme	PA14_RS07690;PA14_19190	PA3471;-	PA14_RS07690;PA14_19190	false	false	50	50	0.433864	0.584777	0.739527	-0.5784	0.362646	0.131046	5.2451	5.8235	0.362646	0.131046	0.4172	0.3654	1	1	1	1	1	1	1	1	1	1	1	0	1	1	1	1	1	1	1	1	1	1	1	1	1	1	1	1
1287	2803	potassium-transporting ATPase subunit A	PA14_RS17630;PA14_43400	PA1633;-	PA14_RS17630;PA14_43400	false	false	52	52	1	1	1	0	0	0	5.26735	NaN	0	0	0	0	1	1	1	1	1	1	1	1	1	1	1	1	1	1	1	1	1	1	1	1	1	1	1	1	1	1	1	1
1288	2804	hypothetical protein	-	-	ACP77_RS26360;-	false	false	2	2	0.904659	0.103658	0.139402	2.54452	-0.984396	-0.855732	7.714	5.16948	-0.984396	-0.855732	0.1097	0.0792	0	0	0	0	0	0	0	0	0	0	0	0	0	0	0	0	0	0	0	0	0	0	0	0	0	0	0	0
1289	2805	terminase	-	-	NT88_RS14365;-	false	false	2	2	0.452653	0.566136	0.938726	0.1338	0.344234	-0.0274611	5.396	5.2622	0.344234	-0.0274611	0.4361	0.4622	0	0	0	0	0	1	0	0	0	0	0	0	0	0	0	0	0	0	0	0	0	0	0	0	0	0	0	0
1290	2806	hypothetical protein	-	-	NT42_RS04480;-	false	false	1	1	0.0478789	0.9584	0.106776	-3.87996	1.31986	0.971528	1.462	5.34196	1.31986	0.971528	0	0.008	1	0	0	0	0	0	0	0	0	0	0	0	0	0	0	0	0	0	0	0	0	0	0	0	0	0	0	0
1291	2808	hypothetical protein	-	-	Q009_RS32340;Q009_05049	false	false	1	1	0.394918	0.630492	0.755716	-0.757922	0.403493	0.121641	4.524	5.28192	0.403493	0.121641	0.4021	0.4067	0	0	0	0	0	0	0	0	0	0	0	0	0	0	0	0	0	0	0	0	0	1	0	0	0	0	0	0
1292	2812	L-lactate permease	PA14_RS25790;PA14_63080	PA4770;-	PA14_RS25790;PA14_63080	false	false	51	51	0.128664	0.884806	0.205412	-3.06153	0.890542	0.687374	5.20847	8.27	0.890542	0.687374	0.1536	0.1582	1	1	1	1	1	1	1	1	1	1	1	1	1	1	1	1	1	1	1	1	1	1	1	1	1	1	1	1
1293	2816	ferrous iron transporter B	PA14_RS16605;PA14_40960	PA1822;-	PA14_RS16605;PA14_40960	false	false	51	51	0.92866	0.0808686	0.237777	2.85729	-1.09222	-0.62383	5.32229	2.465	-1.09222	-0.62383	0.0784	0.0932	1	1	1	1	0	1	1	1	1	1	1	1	1	1	1	1	1	1	1	1	1	1	1	1	1	1	1	1
1294	2817	arylsulfatase	-	-	NT11_RS16555;-	false	false	6	6	0.885507	0.120131	0.316262	1.0447	-0.920346	-0.499953	6.1915	5.1468	-0.920346	-0.499953	0.1211	0.161	0	0	0	0	0	0	0	0	1	0	0	0	0	0	0	1	0	0	0	0	0	0	0	0	0	0	0	0
1295	2818	phage integrase	-	-	NS42_RS22230;-	false	false	2	2	0.912474	0.0953412	0.2283	2.08172	-1.02072	-0.641494	7.269	5.18728	-1.02072	-0.641494	0.1023	0.1332	0	0	0	0	0	0	0	0	0	0	0	0	0	0	0	0	0	0	0	0	0	0	0	0	0	0	0	0
1296	2819	energy-dependent translational throttle protein EttA	PA14_RS24835;PA14_60800	PA4595;-	PA14_RS24835;PA14_60800	false	false	52	52	1	1	1	0	0	0	5.26735	NaN	0	0	0	0	1	1	1	1	1	1	1	1	1	1	1	1	1	1	1	1	1	1	1	1	1	1	1	1	1	1	1	1
1297	2821	type IVB pilus formation outer membrane protein, R64 PilN family	-	-	-	false	false	2	2	0.912474	0.0953412	0.2283	2.08172	-1.02072	-0.641494	7.269	5.18728	-1.02072	-0.641494	0.1023	0.1332	0	0	0	0	0	0	0	0	0	0	0	0	0	0	0	0	0	0	0	0	0	0	0	0	0	0	0	0
1298	2823	transcriptional regulator	-	-	PABE171_RS03115;PABE171_0602	false	false	1	1	0.526562	0.5	0.997882	-0.00647059	-0.30103	0.000920888	5.261	5.26747	-0.30103	0.000920888	0.4747	0.5185	0	0	0	0	0	0	0	0	0	0	0	0	0	0	0	0	0	0	0	0	0	0	0	0	0	0	1	0
1299	2826	hypothetical protein	-	-	NS00_RS21185;-	false	false	1	1	0.252606	0.768203	0.451335	-1.83055	0.597556	0.345501	3.472	5.30255	0.597556	0.345501	0.2811	0.2835	0	0	0	0	0	0	0	0	0	0	0	0	0	0	0	1	0	0	0	0	0	0	0	0	0	0	0	0
1300	2828	molecular chaperone GroEL	PA14_RS23240;PA14_57010	PA4385;-	PA14_RS23240;PA14_57010	false	false	53	52	1	1	1	0	0	0	5.26735	NaN	0	0	0	0	1	1	1	1	1	1	1	1	1	1	1	1	1	1	1	1	1	2	1	1	1	1	1	1	1	1	1	1
1301	2829	long-chain-fatty-acid--CoA ligase	PA14_RS08595;PA14_21340	PA3300;-	PA14_RS08595;PA14_21340	false	false	52	52	1	1	1	0	0	0	5.26735	NaN	0	0	0	0	1	1	1	1	1	1	1	1	1	1	1	1	1	1	1	1	1	1	1	1	1	1	1	1	1	1	1	1
1302	2830	long-chain-fatty-acid--CoA ligase	PA14_RS08600;PA14_21370	PA3299;-	PA14_RS08600;PA14_21370	false	false	52	52	1	1	1	0	0	0	5.26735	NaN	0	0	0	0	1	1	1	1	1	1	1	1	1	1	1	1	1	1	1	1	1	1	1	1	1	1	1	1	1	1	1	1
1303	2831	hypothetical protein	-	-	Q009_RS38350;Q009_06280	false	true	2	2	0.275988	0.739689	0.51229	-1.13812	0.55911	0.290484	4.173	5.31112	0.55911	0.290484	0.2729	0.2782	0	0	0	0	0	0	0	0	0	0	0	0	0	0	0	0	0	1	0	0	0	1	0	0	0	0	0	0
1304	2833	restriction endonuclease HindVIIP subunit M	-	-	NR77_RS25510;-	false	false	1	1	0.72564	0.297	0.726497	0.852039	-0.527244	-0.138766	6.103	5.25096	-0.527244	-0.138766	0.3225	0.3241	0	0	0	0	0	0	0	0	0	0	0	0	0	0	0	0	0	0	0	0	0	0	0	0	0	0	0	0
1305	2835	hypothetical protein	PA14_RS00255;PA14_00620	PA0049;-	PA14_RS00255;PA14_00620	false	false	52	52	1	1	1	0	0	0	5.26735	NaN	0	0	0	0	1	1	1	1	1	1	1	1	1	1	1	1	1	1	1	1	1	1	1	1	1	1	1	1	1	1	1	1
1306	2837	chemotaxis protein	-	-	NR95_RS28555;-	false	false	4	4	0.181403	0.827511	0.351736	-1.16469	0.741357	0.453784	4.19225	5.35694	0.741357	0.453784	0.1839	0.1837	0	0	1	0	0	0	0	0	0	0	0	0	0	0	1	0	0	0	0	0	0	0	0	0	0	0	0	0
1307	2838	terminase	-	-	PACIG1_RS04995;PACIG1_0956	false	false	4	4	0.285485	0.726068	0.523436	-0.799875	0.544417	0.281136	4.529	5.32888	0.544417	0.281136	0.2818	0.2717	0	0	0	0	0	0	0	0	0	0	0	0	0	0	0	0	0	1	0	0	1	0	0	1	0	1	0	0
1308	2840	hydrogen cyanide synthase HcnC	PA14_RS14770;PA14_36310	PA2195;-	PA14_RS14770;PA14_36310	true	false	3	3	0.278031	0.734981	0.504753	-0.955469	0.555907	0.296921	4.367	5.32247	0.555907	0.296921	0.2651	0.2558	0	0	0	1	0	0	0	0	0	0	0	0	0	0	0	0	0	0	0	0	1	0	0	0	0	0	0	0
1309	2841	hypothetical protein	-	-	NS96_RS23860;-	false	false	1	1	0.102758	0.908672	0.274161	-2.64929	0.988183	0.561994	2.669	5.31829	0.988183	0.561994	0.1126	0.1151	0	0	0	0	0	0	1	0	0	0	0	0	0	0	0	0	0	0	0	0	0	0	0	0	0	0	0	0
1310	2842	oxygen-dependent choline dehydrogenase	PA14_RS28895;PA14_70940	PA5372;-	PA14_RS28895;PA14_70940	false	false	52	52	1	1	1	0	0	0	5.26735	NaN	0	0	0	0	1	1	1	1	1	1	1	1	1	1	1	1	1	1	1	1	1	1	1	1	1	1	1	1	1	1	1	1
1311	2844	methyl-accepting chemotaxis protein	PA14_RS12160;PA14_29800	PA2652;-	PA14_RS12160;PA14_29800	false	false	53	52	1	1	1	0	0	0	5.26735	NaN	0	0	0	0	1	1	1	1	1	1	1	1	1	1	1	1	2	1	1	1	1	1	1	1	1	1	1	1	1	1	1	1
1312	2845	lipoprotein	-	-	NR77_RS30905;-	false	false	1	1	0.72564	0.297	0.726497	0.852039	-0.527244	-0.138766	6.103	5.25096	-0.527244	-0.138766	0.3225	0.3241	0	0	0	0	0	0	0	0	0	0	0	0	0	0	0	0	0	0	0	0	0	0	0	0	0	0	0	0
1313	2851	precorrin-3B C(17)-methyltransferase	PA14_RS10745;PA14_26530	PA2903;-	PA14_RS10745;PA14_26530	false	false	46	46	0.0303229	0.971591	0.0479869	-2.03157	1.51823	1.31888	5.03293	7.0645	1.51823	1.31888	0.0278	0.0283	1	1	1	1	1	1	1	1	1	1	1	1	1	1	1	1	1	0	1	1	1	1	1	1	1	1	1	0
1314	2853	mercury(II) reductase	-	-	ACP77_RS13570;-	false	false	22	17	0.687115	0.319827	0.594003	0.379829	-0.495085	-0.226212	5.523	5.14317	-0.495085	-0.226212	0.3192	0.2929	0	0	1	0	0	0	0	0	0	0	0	1	2	0	0	0	0	2	2	3	1	0	0	1	0	1	0	1
1315	2854	AMP-binding protein	PA14_RS12900;PA14_31500	PA2555;-	PA14_RS12900;PA14_31500	false	false	52	52	1	1	1	0	0	0	5.26735	NaN	0	0	0	0	1	1	1	1	1	1	1	1	1	1	1	1	1	1	1	1	1	1	1	1	1	1	1	1	1	1	1	1
1316	2857	long-chain-fatty-acid--CoA ligase	PA14_RS05275;PA14_13110	PA3924;-	PA14_RS05275;PA14_13110	false	false	51	51	0.806811	0.211979	0.393487	2.0722	-0.673707	-0.40507	5.3072	3.235	-0.673707	-0.40507	0.2502	0.2645	1	1	1	1	1	1	1	1	1	1	1	1	1	0	1	1	1	1	1	1	1	1	1	1	1	1	1	1
1317	2858	class II poly(R)-hydroxyalkanoic acid synthase	PA14_RS27275;PA14_66840	PA5058;-	PA14_RS27275;PA14_66840	false	false	52	52	1	1	1	0	0	0	5.26735	NaN	0	0	0	0	1	1	1	1	1	1	1	1	1	1	1	1	1	1	1	1	1	1	1	1	1	1	1	1	1	1	1	1
1318	2859	hypothetical protein	-	PA3506;-	PA3506;-	false	false	9	9	0.604908	0.404435	0.839444	0.17923	-0.393151	-0.0760083	5.41556	5.23633	-0.393151	-0.0760083	0.4075	0.4186	0	0	0	0	0	1	0	0	0	0	0	0	0	1	1	0	0	0	0	1	0	0	0	0	0	0	0	0
1319	2860	hypothetical protein	-	-	NT81_RS26710;-	false	false	1	1	0.945106	0.0626977	0.0763877	4.25141	-1.20275	-1.11698	9.437	5.18559	-1.20275	-1.11698	0.0371	0.0372	0	0	0	0	0	0	0	0	0	0	0	0	0	0	0	0	0	0	0	0	0	0	0	0	0	0	0	0
1320	2866	chromosome partitioning protein ParB	-	-	ACP77_RS15290;-	false	false	8	8	0.749241	0.2589	0.444171	0.707795	-0.586869	-0.35245	5.86625	5.15845	-0.586869	-0.35245	0.2547	0.2155	0	0	1	0	0	0	0	0	0	0	0	0	0	0	0	0	0	1	0	0	0	0	0	0	0	1	0	0
1321	2868	chemotaxis protein	-	-	NQ67_RS21995;-	false	false	1	1	0.92866	0.0808686	0.103292	3.918	-1.09222	-0.985933	9.11	5.192	-1.09222	-0.985933	0.0776	0.0812	0	0	0	0	0	0	0	0	0	0	0	0	0	0	0	0	0	0	0	0	0	0	0	0	0	0	0	0
1322	2871	hypothetical protein	-	PA1387;-	PA1387;-	false	false	29	29	0.796479	0.208774	0.521069	0.431589	-0.680325	-0.283105	5.45824	5.02665	-0.680325	-0.283105	0.2108	0.2603	1	0	0	0	1	0	1	1	0	0	1	0	1	1	0	1	1	0	0	1	0	0	1	1	0	1	1	1
1323	2873	alcohol dehydrogenase	PA14_RS04375;PA14_10850	PA4100;-	PA14_RS04375;PA14_10850	false	false	52	52	1	1	1	0	0	0	5.26735	NaN	0	0	0	0	1	1	1	1	1	1	1	1	1	1	1	1	1	1	1	1	1	1	1	1	1	1	1	1	1	1	1	1
1324	2874	30S ribosomal protein S1	PA14_RS09445;PA14_23330	PA3162;-	PA14_RS09445;PA14_23330	false	false	50	50	0.962821	0.0412095	0.124243	2.64404	-1.385	-0.905729	5.36904	2.725	-1.385	-0.905729	0.0367	0.0496	1	1	0	1	1	1	1	1	1	1	1	1	0	1	1	1	1	1	1	1	1	1	1	1	1	1	1	1
1325	2875	class II poly(R)-hydroxyalkanoic acid synthase	PA14_RS27265;PA14_66820	PA5056;-	PA14_RS27265;PA14_66820	false	false	51	51	0.655343	0.369508	0.715611	0.887412	-0.432376	-0.145323	5.28441	4.397	-0.432376	-0.145323	0.3769	0.3919	1	1	1	1	1	1	1	1	1	1	1	1	1	1	1	1	1	1	1	1	0	1	1	1	1	1	1	1
1326	2876	nuclease	PA14_RS16375;PA14_40370	PA1865;-	PA14_RS16375;PA14_40370	false	false	52	52	1	1	1	0	0	0	5.26735	NaN	0	0	0	0	1	1	1	1	1	1	1	1	1	1	1	1	1	1	1	1	1	1	1	1	1	1	1	1	1	1	1	1
1327	2877	transcriptional regulator	-	-	ACP77_RS12225;-	false	false	24	22	0.901003	0.102263	0.255275	0.76577	-0.990282	-0.592991	5.70914	4.94337	-0.990282	-0.592991	0.0962	0.1245	0	1	2	0	0	0	0	1	0	0	0	0	1	0	0	0	0	1	1	0	1	0	0	1	0	1	0	1
1328	2878	decarboxylase	PA14_RS26865;PA14_65795	PA4977;-	PA14_RS26865;PA14_65795	false	false	47	47	0.343281	0.668061	0.665232	-0.490851	0.464351	0.177027	5.22015	5.711	0.464351	0.177027	0.333	0.3218	1	1	1	1	1	1	1	1	1	1	1	0	1	1	1	1	1	0	1	1	1	1	1	1	1	1	1	0
1329	2885	2,3-dihydroxybenzoate-AMP ligase	PA14_RS03755;PA14_09240	PA4228;-	PA4228;-	false	false	4	4	0.520541	0.49315	0.896999	-0.162604	-0.307021	0.047208	5.11725	5.27985	-0.307021	0.047208	0.4824	0.4614	0	0	0	1	0	0	0	0	0	0	0	0	0	0	0	0	0	0	0	0	0	1	0	0	0	0	0	0
1330	2886	DNA repair protein RecN	PA14_RS25755;PA14_63010	PA4763;-	PA14_RS25755;PA14_63010	false	false	52	52	1	1	1	0	0	0	5.26735	NaN	0	0	0	0	1	1	1	1	1	1	1	1	1	1	1	1	1	1	1	1	1	1	1	1	1	1	1	1	1	1	1	1
1331	2888	hypothetical protein	PA14_RS28490;PA14_69900	PA5295;-	PA14_RS28490;PA14_69900	false	false	52	52	1	1	1	0	0	0	5.26735	NaN	0	0	0	0	1	1	1	1	1	1	1	1	1	1	1	1	1	1	1	1	1	1	1	1	1	1	1	1	1	1	1	1
1332	2889	hypothetical protein	-	-	Q009_RS21375;Q009_02752	false	false	2	2	0.275988	0.739689	0.51229	-1.13812	0.55911	0.290484	4.173	5.31112	0.55911	0.290484	0.2729	0.2782	0	0	0	0	0	0	0	0	0	0	0	0	0	0	0	0	0	1	0	0	0	1	0	0	0	0	0	0
1333	2890	helicase UvrD	-	-	Q009_RS18440;Q009_02157	false	false	2	2	0.275988	0.739689	0.51229	-1.13812	0.55911	0.290484	4.173	5.31112	0.55911	0.290484	0.2729	0.2782	0	0	0	0	0	0	0	0	0	0	0	0	0	0	0	0	0	1	0	0	0	1	0	0	0	0	0	0
1334	2892	phosphate ABC transporter, permease protein PstA	PA14_RS28845;PA14_70830	PA5367;-	PA5367;-	false	false	52	52	1	1	1	0	0	0	5.26735	NaN	0	0	0	0	1	1	1	1	1	1	1	1	1	1	1	1	1	1	1	1	1	1	1	1	1	1	1	1	1	1	1	1
1335	2893	hypothetical protein	-	-	P998_RS24205;P998_03589	false	false	3	3	0.593082	0.422214	0.988197	-0.0212381	-0.374468	0.00515647	5.24733	5.26857	-0.374468	0.00515647	0.411	0.5111	0	0	0	0	0	0	0	0	0	0	0	0	0	0	0	0	0	0	0	1	0	0	0	0	0	0	0	0
1336	2895	hypothetical protein	-	-	Q009_RS32335;Q009_05048	false	false	1	1	0.394918	0.630492	0.755716	-0.757922	0.403493	0.121641	4.524	5.28192	0.403493	0.121641	0.4021	0.4067	0	0	0	0	0	0	0	0	0	0	0	0	0	0	0	0	0	0	0	0	0	1	0	0	0	0	0	0
1337	2897	hypothetical protein	PA14_RS15330;PA14_37680	PA2075;-	PA14_RS15330;PA14_37680	false	false	41	41	0.050954	0.951349	0.154853	-1.15417	1.29282	0.810081	5.0232	6.17736	1.29282	0.810081	0.0456	0.0744	1	1	1	1	1	1	1	0	1	1	1	1	1	1	1	1	1	1	1	1	1	1	0	1	0	1	1	1
1338	2899	hypothetical protein	-	-	PA103_RS29690;PA103_5736	false	false	1	1	0.553007	0.473438	0.985764	0.0434902	-0.324737	-0.00622704	5.31	5.26651	-0.324737	-0.00622704	0.4568	0.4626	0	0	0	0	0	0	0	0	0	0	0	0	0	0	0	0	0	0	0	0	0	0	0	0	0	0	0	1
1339	2907	sulfite reductase	PA14_RS04250;PA14_10550	PA4130;-	PA14_RS04250;PA14_10550	false	false	48	48	0.601625	0.411684	0.989269	0.0168958	-0.385436	-0.00468572	5.26865	5.25175	-0.385436	-0.00468572	0.3953	0.5042	1	1	1	1	1	1	1	1	1	1	1	0	0	1	1	1	1	1	1	1	1	1	0	1	1	1	1	1
1340	2908	choline dehydrogenase	PA14_RS06575;PA14_16390	PA3710;-	PA14_RS06575;PA14_16390	false	false	51	51	0.102758	0.908672	0.143718	-3.52545	0.988183	0.84249	5.19955	8.725	0.988183	0.84249	0.1152	0.1196	1	1	1	1	1	1	1	1	1	1	1	1	1	1	1	1	1	1	1	1	1	1	1	1	1	1	1	1
1341	2909	gamma-glutamyltranspeptidase	PA14_RS19085;PA14_46960	PA1338;-	PA14_RS19085;PA14_46960	false	false	52	52	1	1	1	0	0	0	5.26735	NaN	0	0	0	0	1	1	1	1	1	1	1	1	1	1	1	1	1	1	1	1	1	1	1	1	1	1	1	1	1	1	1	1
1342	2910	membrane protein	PA14_RS22785;PA14_55820	PA4297;-	PA14_RS22785;PA14_55820	false	false	52	52	1	1	1	0	0	0	5.26735	NaN	0	0	0	0	1	1	1	1	1	1	1	1	1	1	1	1	1	1	1	1	1	1	1	1	1	1	1	1	1	1	1	1
1343	2912	ABC transporter ATP-binding protein	PA14_RS18675;PA14_46010	PA1425;-	PA14_RS18675;PA14_46010	false	false	50	50	0.176732	0.835337	0.27793	-1.87736	0.752684	0.556065	5.19514	7.0725	0.752684	0.556065	0.179	0.1509	1	1	1	1	1	1	1	1	1	1	1	1	1	1	1	1	1	1	1	1	1	1	1	1	0	1	1	1
1344	2914	hypothetical protein	-	-	NT88_RS29550;-	false	false	5	5	0.711826	0.298858	0.600532	0.593745	-0.524535	-0.221464	5.804	5.21026	-0.524535	-0.221464	0.2928	0.2934	0	0	0	0	0	0	0	1	0	0	0	0	0	0	0	0	1	0	0	0	0	0	0	0	0	0	0	0
1345	2917	protein kinase	PA14_RS16840;PA14_41520	PA1782;-	PA14_RS16840;PA14_41520	false	false	52	52	1	1	1	0	0	0	5.26735	NaN	0	0	0	0	1	1	1	1	1	1	1	1	1	1	1	1	1	1	1	1	1	1	1	1	1	1	1	1	1	1	1	1
1346	2918	malonate decarboxylase subunit alpha	PA14_RS01025;PA14_02550	PA0208;-	PA14_RS01025;PA14_02550	false	false	52	51	0.07134	0.937302	0.0796457	-4.20655	1.14667	1.09884	5.18645	9.393	1.14667	1.09884	0.0581	0.0631	1	1	1	1	1	1	1	1	1	1	1	1	1	1	1	1	1	1	1	2	1	1	1	1	1	1	1	1
1347	2921	Na/Pi cotransporter	PA14_RS26075;PA14_63750	PA4822;-	PA14_RS26075;PA14_63750	false	false	52	52	1	1	1	0	0	0	5.26735	NaN	0	0	0	0	1	1	1	1	1	1	1	1	1	1	1	1	1	1	1	1	1	1	1	1	1	1	1	1	1	1	1	1
1348	2922	glutamine--tRNA ligase	PA14_RS16780;PA14_41380	PA1794;-	PA14_RS16780;PA14_41380	false	false	52	52	1	1	1	0	0	0	5.26735	NaN	0	0	0	0	1	1	1	1	1	1	1	1	1	1	1	1	1	1	1	1	1	1	1	1	1	1	1	1	1	1	1	1
1349	2930	helicase UvrD	-	-	PABE171_RS03070;PABE171_0594	false	false	1	1	0.526562	0.5	0.997882	-0.00647059	-0.30103	0.000920888	5.261	5.26747	-0.30103	0.000920888	0.4747	0.5185	0	0	0	0	0	0	0	0	0	0	0	0	0	0	0	0	0	0	0	0	0	0	0	0	0	0	1	0
1350	2933	cysteine--tRNA ligase	PA14_RS16775;PA14_41360	PA1795;-	PA14_RS16775;PA14_41360	false	false	52	52	1	1	1	0	0	0	5.26735	NaN	0	0	0	0	1	1	1	1	1	1	1	1	1	1	1	1	1	1	1	1	1	1	1	1	1	1	1	1	1	1	1	1
1351	2934	hypothetical protein	-	-	NQ81_RS02235;-	false	false	1	1	0.320458	0.703	0.566684	-1.39416	0.494228	0.246659	3.9	5.29416	0.494228	0.246659	0.3477	0.3494	0	0	0	0	0	0	0	0	0	0	0	0	0	0	0	0	0	0	1	0	0	0	0	0	0	0	0	0
1352	2935	AMP-binding protein	PA14_RS17710;PA14_43610	PA1617;-	PA14_RS17710;PA14_43610	false	false	52	52	1	1	1	0	0	0	5.26735	NaN	0	0	0	0	1	1	1	1	1	1	1	1	1	1	1	1	1	1	1	1	1	1	1	1	1	1	1	1	1	1	1	1
1353	2936	poly(3-hydroxyalkanoate) synthetase	-	-	ACP77_RS11740;-	false	false	7	7	0.44668	0.5639	0.911881	-0.108527	0.350003	0.0400617	5.17343	5.28196	0.350003	0.0400617	0.4333	0.46	0	0	0	0	0	0	0	0	0	0	0	0	1	0	0	0	0	1	1	0	1	0	0	0	0	0	0	1
1354	2938	hypothetical protein	-	-	NT88_RS29560;-	false	false	5	5	0.711826	0.298858	0.600532	0.593745	-0.524535	-0.221464	5.804	5.21026	-0.524535	-0.221464	0.2928	0.2934	0	0	0	0	0	0	0	1	0	0	0	0	0	0	0	0	1	0	0	0	0	0	0	0	0	0	0	0
1355	2941	iron ABC transporter substrate-binding protein	PA14_RS28085;PA14_68890	PA5216;-	PA14_RS28085;PA14_68890	false	false	52	52	1	1	1	0	0	0	5.26735	NaN	0	0	0	0	1	1	1	1	1	1	1	1	1	1	1	1	1	1	1	1	1	1	1	1	1	1	1	1	1	1	1	1
1356	2942	glucose-6-phosphate isomerase	PA14_RS25590;PA14_62620	PA4732;-	PA14_RS25590;PA14_62620	false	false	52	52	1	1	1	0	0	0	5.26735	NaN	0	0	0	0	1	1	1	1	1	1	1	1	1	1	1	1	1	1	1	1	1	1	1	1	1	1	1	1	1	1	1	1
1357	2943	hypothetical protein	-	-	PA103_RS03260;PA103_0632	false	false	1	1	0.553007	0.473438	0.985764	0.0434902	-0.324737	-0.00622704	5.31	5.26651	-0.324737	-0.00622704	0.4568	0.4626	0	0	0	0	0	0	0	0	0	0	0	0	0	0	0	0	0	0	0	0	0	0	0	0	0	0	0	1
1358	2953	integrase	PA14_RS05585;PA14_13890	PA3868;-	PA14_RS05585;PA14_13890	false	false	15	14	0.102262	0.90137	0.234276	-0.891218	0.990284	0.630273	4.61607	5.50729	0.990284	0.630273	0.1019	0.1168	1	0	1	1	1	0	0	0	0	0	0	1	1	0	0	0	0	0	2	0	1	0	0	0	0	0	0	0
1359	2956	hypothetical protein	-	-	NQ81_RS02170;-	false	false	1	1	0.320458	0.703	0.566684	-1.39416	0.494228	0.246659	3.9	5.29416	0.494228	0.246659	0.3477	0.3494	0	0	0	0	0	0	0	0	0	0	0	0	0	0	0	0	0	0	1	0	0	0	0	0	0	0	0	0
1360	2957	P-type conjugative transfer protein TrbL	PA14_RS06210;PA14_15540	-	PA14_RS06210;PA14_15540	false	false	4	4	0.385183	0.627878	0.810409	-0.301271	0.414333	0.0912958	4.98925	5.29052	0.414333	0.0912958	0.3733	0.4155	0	0	0	1	0	0	0	0	0	0	0	1	0	0	0	0	0	0	0	0	0	0	0	0	0	0	0	0
1361	2959	mammalian cell entry protein	-	-	NR77_RS31040;-	false	false	1	1	0.72564	0.297	0.726497	0.852039	-0.527244	-0.138766	6.103	5.25096	-0.527244	-0.138766	0.3225	0.3241	0	0	0	0	0	0	0	0	0	0	0	0	0	0	0	0	0	0	0	0	0	0	0	0	0	0	0	0
1362	2965	alginate biosynthesis protein AlgZ/FimS	PA14_RS05455;PA14_13560	PA3892;-	PA14_RS05455;PA14_13560	false	false	102	52	1	1	1	0	0	0	5.26735	NaN	0	0	0	0	2	2	1	2	2	2	2	2	2	2	2	2	2	2	2	2	2	2	2	2	2	2	2	2	2	2	2	2
1363	2966	ATP-dependent endonuclease	-	-	NT56_RS30430;-	false	false	1	1	0.115194	0.897242	0.278294	-2.62686	0.93857	0.555496	2.691	5.31786	0.93857	0.555496	0.131	0.1396	0	0	0	0	0	0	0	1	0	0	0	0	0	0	0	0	0	0	0	0	0	0	0	0	0	0	0	0
1364	2967	permease	PA14_RS15245;PA14_37460	PA2091;-	PA14_RS15245;PA14_37460	false	false	52	52	1	1	1	0	0	0	5.26735	NaN	0	0	0	0	1	1	1	1	1	1	1	1	1	1	1	1	1	1	1	1	1	1	1	1	1	1	1	1	1	1	1	1
1365	2969	cation acetate symporter	PA14_RS14610;PA14_35920	-	PA14_RS14610;PA14_35920	false	false	37	37	0.285849	0.720979	0.535841	-0.456551	0.543864	0.270964	5.13565	5.5922	0.543864	0.270964	0.2866	0.2673	1	1	1	1	0	1	1	1	1	1	0	1	0	0	1	1	0	1	1	1	0	1	0	1	1	1	0	1
1366	2970	thiamine pyrophosphate protein	PA14_RS15525;PA14_38200	PA2035;-	PA14_RS15525;PA14_38200	false	false	50	50	0.603228	0.415223	0.944432	-0.12132	-0.381718	0.0248293	5.26268	5.384	-0.381718	0.0248293	0.4023	0.4636	1	1	0	1	1	1	1	1	1	1	1	1	1	1	1	1	1	1	1	1	1	1	1	1	1	1	1	1
1367	2971	sulfite reductase	PA14_RS16525;PA14_40770	PA1838;-	PA14_RS16525;PA14_40770	false	false	52	52	1	1	1	0	0	0	5.26735	NaN	0	0	0	0	1	1	1	1	1	1	1	1	1	1	1	1	1	1	1	1	1	1	1	1	1	1	1	1	1	1	1	1
1368	2972	hypothetical protein	-	-	Q009_RS27550;Q009_04041	false	true	9	8	0.361267	0.648189	0.713321	-0.340625	0.442172	0.146715	4.97912	5.31975	0.442172	0.146715	0.3645	0.3754	0	0	2	0	0	0	0	0	0	1	0	0	0	0	0	0	0	0	0	1	0	1	0	0	0	1	0	0
1369	2975	acyl-CoA synthetase	PA14_RS03905;PA14_09660	PA4198;-	PA14_RS03905;PA14_09660	false	false	51	51	0.0548941	0.952121	0.041044	-4.87643	1.26047	1.38675	5.17357	10.05	1.26047	1.38675	0.0208	0.0245	1	1	1	1	1	1	1	1	1	1	1	1	1	1	1	1	1	1	1	1	1	1	1	1	1	1	1	1
1370	2984	metal-dependent hydrolase	PA14_RS08535;PA14_21210	PA3310;-	PA14_RS08535;PA14_21210	false	false	52	52	1	1	1	0	0	0	5.26735	NaN	0	0	0	0	1	1	1	1	1	1	1	1	1	1	1	1	1	1	1	1	1	1	1	1	1	1	1	1	1	1	1	1
1371	2985	cation acetate symporter	PA14_RS09050;PA14_22350	PA3234;-	PA14_RS09050;PA14_22350	false	false	52	52	1	1	1	0	0	0	5.26735	NaN	0	0	0	0	1	1	1	1	1	1	1	1	1	1	1	1	1	1	1	1	1	1	1	1	1	1	1	1	1	1	1	1
1372	2986	electron transfer flavoprotein-ubiquinone oxidoreductase	PA14_RS10480;PA14_25840	PA2953;-	PA14_RS10480;PA14_25840	false	false	52	52	1	1	1	0	0	0	5.26735	NaN	0	0	0	0	1	1	1	1	1	1	1	1	1	1	1	1	1	1	1	1	1	1	1	1	1	1	1	1	1	1	1	1
1373	2987	phage protein	-	-	Q009_RS28815;Q009_04308	false	true	9	6	0.87105	0.135073	0.274938	1.13701	-0.869432	-0.560765	6.27317	5.13615	-0.869432	-0.560765	0.1311	0.1377	0	0	0	0	0	0	0	0	0	0	0	0	0	0	0	0	0	1	0	0	0	4	0	0	0	0	0	0
1374	2988	hypothetical protein	-	-	NS72_RS01200;-	false	false	1	1	0.897242	0.115194	0.170482	3.30929	-0.93857	-0.768321	8.513	5.20371	-0.93857	-0.768321	0.1357	0.137	0	0	0	0	0	0	0	0	0	0	0	0	0	0	0	0	0	0	0	0	0	0	0	0	0	0	0	0
1375	2991	heparinase	PA14_RS09490;PA14_23430	-	PA14_RS09490;PA14_23430	true	false	4	4	0.219859	0.79017	0.393601	-1.06773	0.657856	0.404943	4.28175	5.34948	0.657856	0.404943	0.2158	0.2015	0	0	0	1	0	0	0	0	0	0	0	1	0	0	0	0	0	0	0	0	0	0	0	0	0	0	0	0
1376	2992	pyoverdine biosynthesis protein PvdE	-	-	Q009_RS20240;Q009_02525	false	false	24	24	0.143518	0.860596	0.430223	-0.527994	0.843094	0.366307	4.98304	5.51104	0.843094	0.366307	0.1403	0.211	0	1	0	0	0	1	1	1	1	0	1	0	1	0	1	1	1	1	0	1	0	1	1	0	1	0	1	0
1377	2993	type I restriction-modification system subunit M	-	-	NS72_RS14855;-	false	false	1	1	0.897242	0.115194	0.170482	3.30929	-0.93857	-0.768321	8.513	5.20371	-0.93857	-0.768321	0.1357	0.137	0	0	0	0	0	0	0	0	0	0	0	0	0	0	0	0	0	0	0	0	0	0	0	0	0	0	0	0
1378	2994	cyclic peptide transporter	-	-	NT05_RS24110;-	false	false	8	8	0.961023	0.0411649	0.215461	1.14034	-1.38547	-0.666631	6.23225	5.09191	-1.38547	-0.666631	0.0409	0.1092	0	0	0	0	0	0	0	0	0	0	0	0	0	0	0	0	0	0	0	0	0	0	0	1	0	1	0	0
1379	2995	hypothetical protein	-	-	NS72_RS00985;-	false	false	1	1	0.897242	0.115194	0.170482	3.30929	-0.93857	-0.768321	8.513	5.20371	-0.93857	-0.768321	0.1357	0.137	0	0	0	0	0	0	0	0	0	0	0	0	0	0	0	0	0	0	0	0	0	0	0	0	0	0	0	0
1380	3005	dienelactone hydrolase	PA14_RS16155;PA14_39860	PA1907;-	PA14_RS16155;PA14_39860	false	false	51	51	0.115194	0.897242	0.170482	-3.30929	0.93857	0.768321	5.20371	8.513	0.93857	0.768321	0.1357	0.1393	1	1	1	1	1	1	1	1	1	1	1	1	1	1	1	1	1	1	1	1	1	1	1	1	1	1	1	1
1381	3007	acyl-CoA dehydrogenase	PA14_RS05030;PA14_12450	PA3972;-	PA14_RS05030;PA14_12450	false	false	52	52	1	1	1	0	0	0	5.26735	NaN	0	0	0	0	1	1	1	1	1	1	1	1	1	1	1	1	1	1	1	1	1	1	1	1	1	1	1	1	1	1	1	1
1382	3008	4-amino-4-deoxy-L-arabinose lipid A transferase	PA14_RS07355;PA14_18330	PA3556;-	PA14_RS07355;PA14_18330	false	false	52	52	1	1	1	0	0	0	5.26735	NaN	0	0	0	0	1	1	1	1	1	1	1	1	1	1	1	1	1	1	1	1	1	1	1	1	1	1	1	1	1	1	1	1
1383	3009	pyoverdine biosynthesis protein PvdE	PA14_RS13725;PA14_33690	PA2397;-	PA14_RS13725;PA14_33690	false	false	20	20	0.193457	0.811662	0.400512	-0.576381	0.713415	0.397384	4.91265	5.48903	0.713415	0.397384	0.1958	0.2037	1	0	1	1	1	0	0	0	0	1	0	1	1	1	0	0	0	0	1	0	1	0	0	0	0	0	0	1
1384	3010	acyl-CoA synthetase	PA14_RS14615;PA14_35940	-	PA14_RS14615;PA14_35940	false	false	40	40	0.598617	0.409804	0.797071	0.204225	-0.387424	-0.0985028	5.31447	5.11025	-0.387424	-0.0985028	0.4011	0.4013	1	1	1	1	0	1	1	1	1	1	0	1	0	0	1	1	0	1	1	1	0	1	0	1	1	1	1	1
1385	3011	hypothetical protein	PA14_RS23755;PA14_58240	PA4488;-	PA14_RS23755;PA14_58240	false	false	52	51	0.252606	0.768203	0.684151	-0.990706	0.597556	0.164848	5.24829	6.239	0.597556	0.164848	0.2907	0.2944	1	1	1	1	1	1	1	1	1	1	1	1	1	1	1	1	1	1	1	2	1	1	1	1	1	1	1	1
1386	3015	DGQHR domain-containing protein	-	-	NS42_RS32305;-	false	false	3	2	0.912474	0.0953412	0.2283	2.08172	-1.02072	-0.641494	7.269	5.18728	-1.02072	-0.641494	0.1023	0.1332	0	0	0	0	0	0	0	0	0	0	0	0	0	0	0	0	0	0	0	0	0	0	0	0	0	0	0	0
1387	3018	RND transporter	-	-	NQ73_RS14280;-	false	false	2	2	0.342935	0.674383	0.625307	-0.849	0.464788	0.203907	4.451	5.3	0.464788	0.203907	0.3337	0.347	0	0	0	0	0	0	0	0	0	0	0	0	0	0	0	0	0	1	0	0	0	0	0	0	0	1	0	0
1388	3019	poly(beta-D-mannuronate) C5 epimerase	PA14_RS07410;PA14_18500	PA3545;-	PA14_RS07410;PA14_18500	false	false	52	52	1	1	1	0	0	0	5.26735	NaN	0	0	0	0	1	1	1	1	1	1	1	1	1	1	1	1	1	1	1	1	1	1	1	1	1	1	1	1	1	1	1	1
1389	3021	arylsulfatase	-	-	Q006_RS14290;Q006_01619	false	false	38	38	0.693376	0.313905	0.602289	0.392722	-0.503202	-0.220195	5.37308	4.98036	-0.503202	-0.220195	0.3062	0.2976	1	1	1	0	0	1	1	1	1	1	0	1	0	0	1	1	0	1	1	1	0	1	0	1	1	1	1	1
1390	3022	pyoverdine biosynthesis protein PvdP	PA14_RS13755;PA14_33740	PA2392;-	PA14_RS13755;PA14_33740	false	false	51	51	0.655343	0.369508	0.715611	0.887412	-0.432376	-0.145323	5.28441	4.397	-0.432376	-0.145323	0.3769	0.3919	1	1	1	1	1	1	1	1	1	1	1	1	1	1	1	1	1	1	1	1	0	1	1	1	1	1	1	1
1391	3023	phage portal protein	-	-	ACP77_RS05605;-	false	false	8	8	0.619569	0.390128	0.535674	0.573511	-0.408793	-0.2711	5.75263	5.17911	-0.408793	-0.2711	0.3828	0.2623	0	0	1	0	0	0	0	0	0	1	0	0	1	0	0	0	0	0	0	1	0	0	0	0	0	0	0	0
1392	3026	hypothetical protein	-	-	PACIG1_RS14780;-	false	false	1	1	0.369508	0.655343	0.715611	-0.887412	0.432376	0.145323	4.397	5.28441	0.432376	0.145323	0.3769	0.3771	0	0	0	0	0	0	0	0	0	0	0	0	0	0	0	0	0	0	0	0	1	0	0	0	0	0	0	0
1393	3032	glycosyl transferase	PA14_RS29320;PA14_72010	PA5455;-	PA14_RS29320;PA14_72010	false	false	51	51	0.369508	0.655343	0.829501	-0.524745	0.432376	0.0811833	5.25725	5.782	0.432376	0.0811833	0.3748	0.3796	1	1	1	1	1	1	1	1	1	1	1	1	1	1	1	1	1	1	1	1	1	1	1	1	1	1	1	1
1394	3033	hypothetical protein	-	-	NR50_RS21025;-	false	false	1	1	0.655343	0.369508	0.829501	0.524745	-0.432376	-0.0811833	5.782	5.25725	-0.432376	-0.0811833	0.3748	0.3808	0	0	0	0	0	0	0	0	0	0	0	0	0	0	0	0	0	0	0	0	0	0	0	0	0	0	0	0
1395	3034	acetolactate synthase	PA14_RS03970;PA14_09820	PA4180;-	PA14_RS03970;PA14_09820	false	false	47	47	0.192387	0.815986	0.2898	-1.19517	0.715824	0.537902	5.15243	6.3476	0.715824	0.537902	0.1958	0.1508	1	1	1	1	1	0	1	1	1	1	1	1	1	1	1	1	1	1	1	1	1	1	0	1	1	1	1	1
1396	3035	hypothetical protein	PA14_RS11720;PA14_28770	-	PA14_RS11720;PA14_28770	false	false	4	4	0.219859	0.79017	0.393601	-1.06773	0.657856	0.404943	4.28175	5.34948	0.657856	0.404943	0.2158	0.2015	0	0	0	1	0	0	0	0	0	0	0	1	0	0	0	0	0	0	0	0	0	0	0	0	0	0	0	0
1397	3036	dihydrolipoyllysine-residue acetyltransferase component of pyruvate dehydrogenase complex	PA14_RS27065;PA14_66310	PA5016;-	PA14_RS27065;PA14_66310	false	false	48	48	0.172489	0.83614	0.388396	-1.07944	0.763238	0.410725	5.18431	6.26375	0.763238	0.410725	0.17	0.1941	1	1	1	1	1	1	1	1	1	1	1	1	1	1	1	1	1	1	1	0	1	1	1	1	1	1	1	0
1398	3037	chromosome segregation protein SMC	-	-	Q009_RS39000;Q009_06416	false	false	4	4	0.79017	0.219859	0.371937	1.11708	-0.657856	-0.42953	6.2985	5.18142	-0.657856	-0.42953	0.2206	0.1887	0	0	0	0	0	0	0	0	0	0	0	0	0	0	0	0	0	0	0	0	0	1	0	0	0	1	0	0
1399	3038	conjugal transfer protein TrbL	-	-	P998_RS09165;P998_00522	false	false	1	1	0.679542	0.344657	0.80835	0.59102	-0.462613	-0.0924004	5.847	5.25598	-0.462613	-0.0924004	0.3711	0.3733	0	0	0	0	0	0	0	0	0	0	0	0	0	0	0	0	0	0	0	0	0	0	0	0	0	0	0	0
1400	3039	hypothetical protein	-	-	NS72_RS01105;-	false	false	1	1	0.897242	0.115194	0.170482	3.30929	-0.93857	-0.768321	8.513	5.20371	-0.93857	-0.768321	0.1357	0.137	0	0	0	0	0	0	0	0	0	0	0	0	0	0	0	0	0	0	0	0	0	0	0	0	0	0	0	0
1401	3040	hypothetical protein	-	-	NQ81_RS02085;-	false	false	1	1	0.320458	0.703	0.566684	-1.39416	0.494228	0.246659	3.9	5.29416	0.494228	0.246659	0.3477	0.3494	0	0	0	0	0	0	0	0	0	0	0	0	0	0	0	0	0	0	1	0	0	0	0	0	0	0	0	0
1402	3041	GTP-binding protein	-	-	NQ67_RS21925;-	false	false	1	1	0.92866	0.0808686	0.103292	3.918	-1.09222	-0.985933	9.11	5.192	-1.09222	-0.985933	0.0776	0.0812	0	0	0	0	0	0	0	0	0	0	0	0	0	0	0	0	0	0	0	0	0	0	0	0	0	0	0	0
1403	3044	hypothetical protein	-	-	NT05_RS02430;-	false	false	1	1	0.446993	0.579218	0.850544	-0.459176	0.349699	0.0703031	4.817	5.27618	0.349699	0.0703031	0.4394	0.4547	0	0	0	0	0	0	0	0	0	0	0	0	0	0	0	0	0	0	0	0	0	0	0	1	0	0	0	0
1404	3048	2,3-dihydroxybenzoate-AMP ligase	-	-	-	false	false	48	48	0.49315	0.520541	0.896999	0.162604	0.307021	-0.047208	5.27985	5.11725	0.307021	-0.047208	0.4824	0.4615	1	1	1	0	1	1	1	1	1	1	1	1	1	1	1	1	1	1	1	1	1	0	1	1	1	1	1	1
1405	3049	membrane protein	PA14_RS22565;PA14_55380	PA0692;-	PA14_RS22565;PA14_55380	false	false	52	52	1	1	1	0	0	0	5.26735	NaN	0	0	0	0	1	1	1	1	1	1	1	1	1	1	1	1	1	1	1	1	1	1	1	1	1	1	1	1	1	1	1	1
1406	3051	hypothetical protein	-	-	Q009_RS21210;Q009_02716	false	true	1	1	0.394918	0.630492	0.755716	-0.757922	0.403493	0.121641	4.524	5.28192	0.403493	0.121641	0.4021	0.4067	0	0	0	0	0	0	0	0	0	0	0	0	0	0	0	0	0	0	0	0	0	1	0	0	0	0	0	0
1407	3055	peptidase	-	-	NT11_RS05310;-	false	false	2	2	0.0994362	0.908628	0.191711	-2.253	1.00246	0.717354	3.101	5.354	1.00246	0.717354	0.1003	0.0904	0	0	0	0	0	0	0	0	1	0	0	0	0	0	0	1	0	0	0	0	0	0	0	0	0	0	0	0
1408	3063	sensor histidine kinase	PA14_RS18820;PA14_46370	PA1396;-	PA14_RS18820;PA14_46370	false	false	51	51	0.897242	0.115194	0.278294	2.62686	-0.93857	-0.555496	5.31786	2.691	-0.93857	-0.555496	0.131	0.1435	1	1	1	1	1	1	1	0	1	1	1	1	1	1	1	1	1	1	1	1	1	1	1	1	1	1	1	1
1409	3064	membrane protein	PA14_RS24025;PA14_58890	PA4540;-	PA14_RS24025;PA14_58890	false	false	52	52	1	1	1	0	0	0	5.26735	NaN	0	0	0	0	1	1	1	1	1	1	1	1	1	1	1	1	1	1	1	1	1	1	1	1	1	1	1	1	1	1	1	1
1410	3066	halogenase	-	-	ACP77_RS11530;-	false	false	8	8	0.429543	0.580393	0.841109	-0.185955	0.366993	0.0751476	5.11	5.29595	0.366993	0.0751476	0.419	0.4241	0	0	0	0	0	0	0	0	1	0	1	0	0	1	0	0	0	0	0	0	0	0	0	0	0	0	1	0
1411	3069	hypothetical protein	-	-	NT88_RS29535;-	false	false	5	5	0.711826	0.298858	0.600532	0.593745	-0.524535	-0.221464	5.804	5.21026	-0.524535	-0.221464	0.2928	0.2934	0	0	0	0	0	0	0	1	0	0	0	0	0	0	0	0	1	0	0	0	0	0	0	0	0	0	0	0
1412	3073	hypothetical protein	-	-	Y880_RS02435;-	false	false	1	1	0.937302	0.07134	0.0796457	4.20655	-1.14667	-1.09884	9.393	5.18645	-1.14667	-1.09884	0.0581	0.0638	0	0	0	0	0	0	0	0	0	0	0	0	0	0	0	0	0	0	0	0	0	0	0	0	0	0	0	0
1413	3074	protein BatD	PA14_RS09875;PA14_24380	PA3075;-	PA14_RS09875;PA14_24380	false	false	51	50	0.584777	0.433864	0.728397	0.60408	-0.362646	-0.137632	5.29058	4.6865	-0.362646	-0.137632	0.4181	0.4035	1	1	1	1	1	1	1	1	1	1	1	0	1	1	1	1	1	1	1	2	1	1	1	1	1	1	1	1
1414	3075	secretion protein HlyD	-	-	NS42_RS07965;-	false	false	2	2	0.912474	0.0953412	0.2283	2.08172	-1.02072	-0.641494	7.269	5.18728	-1.02072	-0.641494	0.1023	0.1332	0	0	0	0	0	0	0	0	0	0	0	0	0	0	0	0	0	0	0	0	0	0	0	0	0	0	0	0
1415	3076	long-chain-fatty-acid--CoA ligase	-	-	L683_RS62350;L683_25095	false	false	1	1	0.0626977	0.945106	0.203929	-3.07141	1.20275	0.690521	2.255	5.32641	1.20275	0.690521	0.0322	0.0355	0	0	1	0	0	0	0	0	0	0	0	0	0	0	0	0	0	0	0	0	0	0	0	0	0	0	0	0
1416	3077	P-type conjugative transfer protein TrbL	-	-	NT49_RS27820;-	false	false	1	1	0.27436	0.747394	0.463851	-1.78059	0.561679	0.333622	3.521	5.30159	0.561679	0.333622	0.3131	0.3252	0	0	0	0	0	0	0	0	0	0	0	0	0	0	0	0	1	0	0	0	0	0	0	0	0	0	0	0
1417	3080	EmrB/QacA family drug resistance transporter	PA14_RS11090;PA14_27430	PA2835;-	PA14_RS11090;PA14_27430	false	false	50	50	0.0334766	0.969917	0.0389696	-3.51744	1.47526	1.40927	5.13206	8.6495	1.47526	1.40927	0.0259	0.0266	1	1	1	1	1	1	1	1	1	1	1	1	1	1	1	1	1	1	1	1	1	1	1	1	1	1	1	1
1418	3082	2,5-dioxovalerate dehydrogenase	PA14_RS14660;PA14_36050	PA1253;-	PA1253;-	false	false	93	51	0.115194	0.897242	0.170482	-3.30929	0.93857	0.768321	5.20371	8.513	0.93857	0.768321	0.1357	0.1393	2	2	2	2	2	2	2	2	2	2	2	2	1	2	2	2	1	2	2	2	1	2	1	2	2	2	2	2
1419	3084	hypothetical protein	-	-	NT47_RS04685;-	false	false	1	1	0.703	0.320458	0.734059	0.827569	-0.494228	-0.134269	6.079	5.25143	-0.494228	-0.134269	0.34	0.349	0	0	0	0	0	0	0	0	0	0	0	0	0	0	0	0	0	0	0	0	0	0	0	0	0	0	0	0
1420	3085	aldehyde dehydrogenase	PA14_RS14085;PA14_34600	PA2323;-	PA14_RS14085;PA14_34600	false	false	50	50	0.769607	0.245107	0.432952	1.36068	-0.610645	-0.36356	5.31968	3.959	-0.610645	-0.36356	0.2499	0.2342	1	1	1	1	1	1	1	1	1	1	1	1	1	1	1	1	0	1	1	1	0	1	1	1	1	1	1	1
1421	3086	thiamine biosynthesis protein ThiF	-	-	NS72_RS32675;-	false	false	2	2	0.810653	0.202501	0.35886	1.59032	-0.693573	-0.445075	6.7965	5.20618	-0.693573	-0.445075	0.2017	0.1869	0	0	0	0	0	0	0	0	0	0	0	0	0	0	0	0	0	0	0	0	0	0	0	0	0	1	0	0
1422	3088	hypothetical protein	-	-	Q000_RS19885;Q000_02680	false	false	1	1	0.158784	0.85681	0.307161	-2.47596	0.799192	0.512634	2.839	5.31496	0.799192	0.512634	0.1896	0.1988	0	0	0	0	0	0	0	0	0	0	1	0	0	0	0	0	0	0	0	0	0	0	0	0	0	0	0	0
1423	3089	integrase	-	-	NT80_RS04565;-	false	true	5	5	0.982603	0.0187761	0.0632799	2.07254	-1.7264	-1.19873	7.1406	5.06806	-1.7264	-1.19873	0.0161	0.0375	0	0	0	0	0	0	0	0	0	0	0	0	0	0	0	0	0	0	0	0	0	0	0	0	0	1	0	0
1424	3093	P-type conjugative transfer protein TrbL	-	-	NQ81_RS08315;-	false	false	1	1	0.320458	0.703	0.566684	-1.39416	0.494228	0.246659	3.9	5.29416	0.494228	0.246659	0.3477	0.3494	0	0	0	0	0	0	0	0	0	0	0	0	0	0	0	0	0	0	1	0	0	0	0	0	0	0	0	0
1425	3095	hypothetical protein	-	-	Y880_RS26280;-	false	false	4	4	0.940916	0.0632353	0.0696788	2.24131	-1.19904	-1.1569	7.33625	5.09494	-1.19904	-1.1569	0.0613	0.0419	0	0	0	0	0	0	0	0	0	0	0	0	0	0	1	0	0	0	0	0	0	0	0	0	0	0	0	0
1426	3096	microcin C ABC transporter ATP-binding protein YejF	PA14_RS16680;PA14_41160	PA1807;-	PA14_RS16680;PA14_41160	false	false	53	52	1	1	1	0	0	0	5.26735	NaN	0	0	0	0	1	1	1	1	1	1	1	1	1	1	1	1	1	1	1	1	1	1	2	1	1	1	1	1	1	1	1	1
1427	3100	chemotaxis protein	PA14_RS06585;PA14_16430	PA3708;-	PA14_RS06585;PA14_16430	false	false	52	52	1	1	1	0	0	0	5.26735	NaN	0	0	0	0	1	1	1	1	1	1	1	1	1	1	1	1	1	1	1	1	1	1	1	1	1	1	1	1	1	1	1	1
1428	3101	CTP synthetase	PA14_RS06940;PA14_17290	PA3637;-	PA14_RS06940;PA14_17290	false	false	51	51	0.115194	0.897242	0.170482	-3.30929	0.93857	0.768321	5.20371	8.513	0.93857	0.768321	0.1357	0.1393	1	1	1	1	1	1	1	1	1	1	1	1	1	1	1	1	1	1	1	1	1	1	1	1	1	1	1	1
1429	3102	diguanylate cyclase response regulator	PA14_RS26180;PA14_64050	PA4843;-	PA14_RS26180;PA14_64050	false	false	51	51	0.526562	0.5	0.937531	0.19102	-0.30103	-0.0280144	5.27102	5.08	-0.30103	-0.0280144	0.4854	0.5014	1	1	1	1	1	1	1	1	1	1	1	1	1	1	1	1	1	1	1	1	1	1	1	1	1	0	1	1
1430	3103	nuclease PIN	PA14_RS02370;PA14_05870	PA0450;-	PA14_RS02370;PA14_05870	false	false	51	51	0.297	0.72564	0.726497	-0.852039	0.527244	0.138766	5.25096	6.103	0.527244	0.138766	0.3225	0.3271	1	1	1	1	1	1	1	1	1	1	1	1	1	1	1	1	1	1	1	1	1	1	1	1	1	1	1	1
1431	3104	hypothetical protein	-	-	Y880_RS10070;-	false	false	1	1	0.937302	0.07134	0.0796457	4.20655	-1.14667	-1.09884	9.393	5.18645	-1.14667	-1.09884	0.0581	0.0638	0	0	0	0	0	0	0	0	0	0	0	0	0	0	0	0	0	0	0	0	0	0	0	0	0	0	0	0
1432	3107	hypothetical protein	-	-	NT81_RS27880;-	false	false	1	1	0.945106	0.0626977	0.0763877	4.25141	-1.20275	-1.11698	9.437	5.18559	-1.20275	-1.11698	0.0371	0.0372	0	0	0	0	0	0	0	0	0	0	0	0	0	0	0	0	0	0	0	0	0	0	0	0	0	0	0	0
1433	3108	SAM-dependent methyltransferase	-	-	NR40_RS30105;-	false	false	3	3	0.970207	0.0325482	0.132567	2.13482	-1.48747	-0.877564	7.279	5.14418	-1.48747	-0.877564	0.0268	0.0765	0	0	0	0	0	0	0	0	0	0	0	0	0	0	0	0	0	0	0	0	0	0	0	0	0	0	0	0
1434	3109	hypothetical protein	-	-	NS86_RS24860;-	false	false	1	1	0.420782	0.605082	0.789046	-0.651882	0.375943	0.102898	4.628	5.27988	0.375943	0.102898	0.4142	0.4322	0	0	0	0	0	0	0	0	0	0	0	0	0	0	0	0	0	0	0	0	0	0	1	0	0	0	0	0
1435	3110	glutamate--tRNA ligase	PA14_RS09540;PA14_23560	PA3134;-	PA14_RS09540;PA14_23560	false	false	51	51	0.07134	0.937302	0.0796457	-4.20655	1.14667	1.09884	5.18645	9.393	1.14667	1.09884	0.0581	0.0631	1	1	1	1	1	1	1	1	1	1	1	1	1	1	1	1	1	1	1	1	1	1	1	1	1	1	1	1
1436	3114	methyl-accepting chemotaxis protein	PA14_RS19525;PA14_48030	PA1251;-	PA14_RS19525;PA14_48030	false	false	52	52	1	1	1	0	0	0	5.26735	NaN	0	0	0	0	1	1	1	1	1	1	1	1	1	1	1	1	1	1	1	1	1	1	1	1	1	1	1	1	1	1	1	1
1437	3115	chemotaxis transducer	PA14_RS17755;PA14_43710	PA1608;-	PA14_RS17755;PA14_43710	false	false	52	52	1	1	1	0	0	0	5.26735	NaN	0	0	0	0	1	1	1	1	1	1	1	1	1	1	1	1	1	1	1	1	1	1	1	1	1	1	1	1	1	1	1	1
1438	3116	chemotaxis transducer	PA14_RS26545;PA14_64920	PA4915;-	PA14_RS26545;PA14_64920	false	false	49	49	0.252324	0.760043	0.457192	-1.06439	0.598041	0.339901	5.20594	6.27033	0.598041	0.339901	0.2464	0.2258	1	1	1	1	1	1	1	1	1	1	1	1	1	1	1	1	1	1	1	0	1	1	1	1	1	1	0	1
1439	3122	hypothetical protein	-	-	NS00_RS01635;-	false	false	1	1	0.252606	0.768203	0.451335	-1.83055	0.597556	0.345501	3.472	5.30255	0.597556	0.345501	0.2811	0.2835	0	0	0	0	0	0	0	0	0	0	0	0	0	0	0	1	0	0	0	0	0	0	0	0	0	0	0	0
1440	3127	2-octaprenylphenol hydroxylase	-	-	ACP77_RS11785;-	false	false	7	7	0.44668	0.5639	0.911881	-0.108527	0.350003	0.0400617	5.17343	5.28196	0.350003	0.0400617	0.4333	0.46	0	0	0	0	0	0	0	0	0	0	0	0	1	0	0	0	0	1	1	0	1	0	0	0	0	0	0	1
1441	3130	hypothetical protein	-	-	NS42_RS25705;-	false	false	2	2	0.912474	0.0953412	0.2283	2.08172	-1.02072	-0.641494	7.269	5.18728	-1.02072	-0.641494	0.1023	0.1332	0	0	0	0	0	0	0	0	0	0	0	0	0	0	0	0	0	0	0	0	0	0	0	0	0	0	0	0
1442	3131	short-chain dehydrogenase	-	-	NQ81_RS26785;-	false	false	1	1	0.320458	0.703	0.566684	-1.39416	0.494228	0.246659	3.9	5.29416	0.494228	0.246659	0.3477	0.3494	0	0	0	0	0	0	0	0	0	0	0	0	0	0	0	0	0	0	1	0	0	0	0	0	0	0	0	0
1443	3134	isocitrate lyase	PA14_RS12250;PA14_30050	PA2634;-	PA14_RS12250;PA14_30050	false	false	52	52	1	1	1	0	0	0	5.26735	NaN	0	0	0	0	1	1	1	1	1	1	1	1	1	1	1	1	1	1	1	1	1	1	1	1	1	1	1	1	1	1	1	1
1444	3136	MFS transporter	PA14_RS06580;PA14_16410	PA3709;-	PA14_RS06580;PA14_16410	false	false	52	52	1	1	1	0	0	0	5.26735	NaN	0	0	0	0	1	1	1	1	1	1	1	1	1	1	1	1	1	1	1	1	1	1	1	1	1	1	1	1	1	1	1	1
1445	3137	phage protein	-	-	NT42_RS12420;-	false	false	4	4	0.780141	0.230157	0.630328	0.603854	-0.637975	-0.200434	5.82475	5.2209	-0.637975	-0.200434	0.2262	0.3101	1	0	0	0	0	0	0	0	0	0	0	0	0	0	0	0	0	0	0	0	0	0	0	0	0	0	0	0
1446	3138	DNA cytosine methyltransferase	-	-	Q012_RS15390;Q012_01634	false	false	2	2	0.566136	0.452653	0.979668	0.04436	-0.344234	-0.00892107	5.31	5.26564	-0.344234	-0.00892107	0.4348	0.4774	0	0	0	0	0	0	0	0	0	0	0	0	0	0	0	0	0	0	0	0	0	0	0	0	0	1	0	0
1447	3140	chemotaxis protein	PA14_RS12575;PA14_30820	PA2573;-	PA14_RS12575;PA14_30820	false	false	51	51	0.824547	0.193189	0.384173	2.11298	-0.714017	-0.415473	5.30798	3.195	-0.714017	-0.415473	0.2293	0.2438	1	1	1	1	1	1	1	1	1	1	1	1	0	1	1	1	1	1	1	1	1	1	1	1	1	1	1	1
1448	3141	gamma-glutamyltransferase	PA14_RS00835;PA14_02050	PA0164;-	PA14_RS00835;PA14_02050	false	false	52	52	1	1	1	0	0	0	5.26735	NaN	0	0	0	0	1	1	1	1	1	1	1	1	1	1	1	1	1	1	1	1	1	1	1	1	1	1	1	1	1	1	1	1
1449	3142	acetyl-CoA carboxylase carboxyltransferase subunit	PA14_RS10820;PA14_26720	PA2888;-	PA14_RS10820;PA14_26720	false	false	51	51	0.897242	0.115194	0.278294	2.62686	-0.93857	-0.555496	5.31786	2.691	-0.93857	-0.555496	0.131	0.1435	1	1	1	1	1	1	1	0	1	1	1	1	1	1	1	1	1	1	1	1	1	1	1	1	1	1	1	1
1450	3143	two-component sensor histidine kinase	PA14_RS20080;PA14_49420	PA1158;-	PA14_RS20080;PA14_49420	false	false	52	52	1	1	1	0	0	0	5.26735	NaN	0	0	0	0	1	1	1	1	1	1	1	1	1	1	1	1	1	1	1	1	1	1	1	1	1	1	1	1	1	1	1	1
1451	3144	L-aspartate oxidase	PA14_RS22155;PA14_54450	PA0761;-	PA14_RS22155;PA14_54450	false	false	52	52	1	1	1	0	0	0	5.26735	NaN	0	0	0	0	1	1	1	1	1	1	1	1	1	1	1	1	1	1	1	1	1	1	1	1	1	1	1	1	1	1	1	1
1452	3145	chemotaxis transducer	PA14_RS22750;PA14_55750	PA4290;-	PA14_RS22750;PA14_55750	false	false	52	52	1	1	1	0	0	0	5.26735	NaN	0	0	0	0	1	1	1	1	1	1	1	1	1	1	1	1	1	1	1	1	1	1	1	1	1	1	1	1	1	1	1	1
1453	3146	aldolase	-	-	Y880_RS20605;-	false	false	13	13	0.575422	0.432874	0.79922	0.196564	-0.363639	-0.0973338	5.41477	5.21821	-0.363639	-0.0973338	0.4339	0.4	0	0	1	0	0	0	0	0	0	0	0	0	1	1	0	1	0	0	1	0	1	0	0	0	1	0	0	0
1454	3147	sulfatase	-	PA2333;-	PA2333;-	false	false	40	40	0.922574	0.0806249	0.142504	1.15257	-1.09353	-0.846174	5.53332	4.38075	-1.09353	-0.846174	0.0749	0.0656	0	1	1	0	1	1	1	1	1	1	1	0	1	1	1	1	0	0	1	0	0	0	1	0	1	1	1	1
1455	3148	ABC transporter permease	PA14_RS00945;PA14_02340	PA0185;-	PA14_RS00945;PA14_02340	false	false	51	51	0.252606	0.768203	0.684151	-0.990706	0.597556	0.164848	5.24829	6.239	0.597556	0.164848	0.2907	0.2944	1	1	1	1	1	1	1	1	1	1	1	1	1	1	1	1	1	1	1	1	1	1	1	1	1	1	1	1
1456	3149	hypothetical protein	-	-	PA103_RS29675;PA103_5734	false	false	6	6	0.298097	0.711757	0.667057	-0.450304	0.525643	0.175837	4.869	5.3193	0.525643	0.175837	0.2898	0.3397	0	0	1	0	0	0	0	0	0	0	0	0	0	0	0	0	0	1	1	0	0	0	0	1	0	0	0	1
1457	3150	DNA methyltransferase	-	-	Y880_RS02210;-	false	false	12	12	0.955898	0.0461654	0.121844	1.2144	-1.33568	-0.914197	6.2015	4.9871	-1.33568	-0.914197	0.0454	0.0648	0	0	1	0	0	0	0	0	0	0	0	0	1	0	0	0	0	0	1	0	1	0	0	0	0	0	0	0
1458	3155	portal protein	-	-	Q009_RS17770;Q009_02010	false	true	3	3	0.291347	0.721969	0.508563	-0.94698	0.535589	0.293655	4.375	5.32198	0.535589	0.293655	0.2961	0.2749	0	0	0	0	0	0	0	0	0	0	0	0	0	0	0	0	1	0	0	0	0	1	0	0	0	1	0	0
1459	3157	microcin C ABC transporter ATP-binding protein YejF	PA14_RS15390;PA14_37840	PA2061;-	PA14_RS15390;PA14_37840	false	false	50	50	0.471549	0.547347	0.679818	-0.71776	0.326473	0.167607	5.23974	5.9575	0.326473	0.167607	0.4597	0.3316	1	1	1	1	1	0	1	1	1	1	1	1	1	1	1	1	1	1	1	1	1	1	1	1	1	1	1	1
1460	3158	ABC transporter	PA14_RS23795;PA14_58350	PA4496;-	PA14_RS23795;PA14_58350	false	false	98	50	0.342935	0.674383	0.53883	-1.06772	0.464788	0.268548	5.22628	6.294	0.464788	0.268548	0.3297	0.2621	2	2	2	2	2	2	2	2	2	2	2	2	0	2	2	2	2	2	2	2	1	2	2	2	2	2	1	2
1461	3159	hypothetical protein	-	-	NS00_RS21165;-	false	false	1	1	0.252606	0.768203	0.451335	-1.83055	0.597556	0.345501	3.472	5.30255	0.597556	0.345501	0.2811	0.2835	0	0	0	0	0	0	0	0	0	0	0	0	0	0	0	1	0	0	0	0	0	0	0	0	0	0	0	0
1462	3161	hypothetical protein	-	-	NQ67_RS11660;-	false	false	1	1	0.92866	0.0808686	0.103292	3.918	-1.09222	-0.985933	9.11	5.192	-1.09222	-0.985933	0.0776	0.0812	0	0	0	0	0	0	0	0	0	0	0	0	0	0	0	0	0	0	0	0	0	0	0	0	0	0	0	0
1463	3163	LysR family transcriptional regulator	PA14_RS21880;PA14_53740	PA0813;-	PA14_RS21880;PA14_53740	false	false	102	52	1	1	1	0	0	0	5.26735	NaN	0	0	0	0	2	2	2	2	2	2	2	2	2	2	2	2	2	2	2	2	2	2	2	2	2	2	2	2	2	2	2	2
1464	3164	phospho-2-dehydro-3-deoxyheptonate aldolase	PA14_RS03835;PA14_09460	PA1900;-	PA14_RS03835;PA14_09460	false	false	145	52	1	1	1	0	0	0	5.26735	NaN	0	0	0	0	2	3	3	4	3	3	2	2	2	5	4	2	1	2	3	3	2	3	2	3	2	4	2	3	2	3	2	2
1465	3171	lysine decarboxylase	PA14_RS19045;PA14_46860	PA1346;-	PA14_RS19045;PA14_46860	false	false	51	51	0.553007	0.473438	0.922567	0.236902	-0.324737	-0.035002	5.2719	5.035	-0.324737	-0.035002	0.463	0.4761	1	1	1	1	1	1	1	1	1	1	1	1	1	1	1	1	1	1	1	1	1	1	1	1	0	1	1	1
1466	3172	spermidine/putrescine ABC transporter ATP-binding protein	PA14_RS01735;PA14_04250	PA0326;-	PA14_RS01735;PA14_04250	false	false	50	50	0.15314	0.857835	0.236175	-2.0474	0.814911	0.626765	5.1886	7.236	0.814911	0.626765	0.1536	0.1303	1	1	1	1	1	1	1	1	1	1	1	1	1	1	1	1	1	1	1	1	1	1	1	1	0	1	1	1
1467	3174	hypothetical protein	PA14_RS07115;PA14_17690	PA3602;-	PA14_RS07115;PA14_17690	false	false	51	51	0.446993	0.579218	0.963079	-0.112824	0.349699	0.0163379	5.26518	5.378	0.349699	0.0163379	0.4479	0.4518	1	1	1	1	1	1	1	1	1	1	1	1	1	1	1	1	1	1	1	1	1	1	1	1	1	1	1	1
1468	3175	aminopeptidase	PA14_RS10555;PA14_26020	PA2939;-	PA14_RS10555;PA14_26020	false	false	52	52	1	1	1	0	0	0	5.26735	NaN	0	0	0	0	1	1	1	1	1	1	1	1	1	1	1	1	1	1	1	1	1	1	1	1	1	1	1	1	1	1	1	1
1469	3176	hypothetical protein	-	-	NR50_RS21015;-	false	true	1	1	0.655343	0.369508	0.829501	0.524745	-0.432376	-0.0811833	5.782	5.25725	-0.432376	-0.0811833	0.3748	0.3808	0	0	0	0	0	0	0	0	0	0	0	0	0	0	0	0	0	0	0	0	0	0	0	0	0	0	0	0
1470	3178	integrase	-	-	PACIG1_RS31620;PACIG1_6006	false	false	2	2	0.189347	0.823268	0.377467	-1.5302	0.722742	0.423121	3.796	5.3262	0.722742	0.423121	0.1876	0.1904	0	0	0	0	0	0	0	0	0	0	0	0	1	0	0	0	0	0	0	0	1	0	0	0	0	0	0	0
1471	3179	enterochelin esterase	PA14_RS13425;PA14_32905	-	PA14_RS13425;PA14_32905	false	false	50	50	0.073346	0.93305	0.185054	-2.2866	1.13462	0.732701	5.1794	7.466	1.13462	0.732701	0.0781	0.1089	1	1	1	1	1	1	1	1	1	1	1	1	1	1	1	1	1	1	1	1	1	1	1	1	1	1	1	1
1472	3184	hypothetical protein	-	-	NS96_RS23855;-	false	false	1	1	0.102758	0.908672	0.274161	-2.64929	0.988183	0.561994	2.669	5.31829	0.988183	0.561994	0.1126	0.1151	0	0	0	0	0	0	1	0	0	0	0	0	0	0	0	0	0	0	0	0	0	0	0	0	0	0	0	0
1473	3186	methylcrotonyl-CoA carboxylase subunit beta	PA14_RS15630;PA14_38460	PA2014;-	PA14_RS15630;PA14_38460	false	false	52	52	1	1	1	0	0	0	5.26735	NaN	0	0	0	0	1	1	1	1	1	1	1	1	1	1	1	1	1	1	1	1	1	1	1	1	1	1	1	1	1	1	1	1
1474	3187	bifunctional phosphoribosylaminoimidazolecarboxamide formyltransferase/inosine monophosphate cyclohydrolase	PA14_RS26235;PA14_64200	PA4854;-	PA14_RS26235;PA14_64200	false	false	49	49	0.608237	0.406918	0.709645	0.534163	-0.390493	-0.148959	5.29816	4.764	-0.390493	-0.148959	0.4002	0.3744	1	1	1	1	1	1	1	1	1	1	1	1	1	1	1	1	1	1	1	0	0	1	1	1	1	1	1	1
1475	3188	peptide ABC transporter substrate-binding protein	-	-	Q012_RS25875;Q012_03790	false	false	1	1	0.605082	0.420782	0.909186	0.278	-0.375943	-0.0413471	5.54	5.262	-0.375943	-0.0413471	0.4281	0.438	0	0	0	0	0	0	0	0	0	0	0	0	0	0	0	0	0	0	0	0	0	0	0	0	0	0	0	0
1476	3190	magnesium chelatase	PA14_RS10540;PA14_25990	PA2941;-	PA14_RS10540;PA14_25990	false	false	104	52	1	1	1	0	0	0	5.26735	NaN	0	0	0	0	2	2	2	2	2	2	2	2	2	2	2	2	2	2	2	2	2	2	2	2	2	2	2	2	2	2	2	2
1477	3192	peptide ABC transporter substrate-binding protein	PA14_RS23800;PA14_58360	PA4497;-	PA14_RS23800;PA14_58360	false	false	52	52	1	1	1	0	0	0	5.26735	NaN	0	0	0	0	1	1	1	1	1	1	1	1	1	1	1	1	1	1	1	1	1	1	1	1	1	1	1	1	1	1	1	1
1478	3194	SagB-type dehydrogenase	PA14_RS05180;PA14_12860	PA3943;-	PA14_RS05180;PA14_12860	false	false	50	49	0.0910383	0.915222	0.201623	-1.81822	1.04078	0.695459	5.16245	6.98067	1.04078	0.695459	0.0913	0.1086	1	1	1	1	1	1	1	1	1	1	1	1	2	1	1	1	1	1	1	1	1	1	1	1	1	1	1	0
1479	3195	ubiquinone biosynthesis protein UbiB	PA14_RS27310;PA14_66920	PA5065;-	PA14_RS27310;PA14_66920	false	false	52	52	1	1	1	0	0	0	5.26735	NaN	0	0	0	0	1	1	1	1	1	1	1	1	1	1	1	1	1	1	1	1	1	1	1	1	1	1	1	1	1	1	1	1
1480	3198	asparagine synthase	PA14_RS19735;PA14_48610	PA1214;-	PA14_RS19735;PA14_48610	false	false	51	51	0.115194	0.897242	0.170482	-3.30929	0.93857	0.768321	5.20371	8.513	0.93857	0.768321	0.1357	0.1393	1	1	1	1	1	1	1	1	1	1	1	1	1	1	1	1	1	1	1	1	1	1	1	1	1	1	1	1
1481	3199	murein transglycosylase	PA14_RS16655;PA14_41090	PA1812;-	PA14_RS16655;PA14_41090	false	false	52	52	1	1	1	0	0	0	5.26735	NaN	0	0	0	0	1	1	1	1	1	1	1	1	1	1	1	1	1	1	1	1	1	1	1	1	1	1	1	1	1	1	1	1
1482	3200	ATP-dependent endonuclease	-	-	NQ73_RS29210;-	false	false	1	1	0.5	0.526562	0.937531	-0.19102	0.30103	0.0280144	5.08	5.27102	0.30103	0.0280144	0.4854	0.4917	0	0	0	0	0	0	0	0	0	0	0	0	0	0	0	0	0	0	0	0	0	0	0	0	0	1	0	0
1483	3201	hypothetical protein	-	-	NQ81_RS02105;-	false	false	1	1	0.320458	0.703	0.566684	-1.39416	0.494228	0.246659	3.9	5.29416	0.494228	0.246659	0.3477	0.3494	0	0	0	0	0	0	0	0	0	0	0	0	0	0	0	0	0	0	1	0	0	0	0	0	0	0	0	0
1484	3202	hypothetical protein	-	-	NS42_RS31085;-	false	false	2	2	0.912474	0.0953412	0.2283	2.08172	-1.02072	-0.641494	7.269	5.18728	-1.02072	-0.641494	0.1023	0.1332	0	0	0	0	0	0	0	0	0	0	0	0	0	0	0	0	0	0	0	0	0	0	0	0	0	0	0	0
1485	3205	anthranilate synthase component I	PA14_RS20885;PA14_51360	PA1001;-	PA14_RS20885;PA14_51360	false	false	51	51	0.320458	0.703	0.734059	-0.827569	0.494228	0.134269	5.25143	6.079	0.494228	0.134269	0.34	0.3433	1	1	1	1	1	1	1	1	1	1	1	1	1	1	1	1	1	1	1	1	1	1	1	1	1	1	1	1
1486	3208	hypothetical protein	-	-	NQ67_RS21875;-	false	false	1	1	0.92866	0.0808686	0.103292	3.918	-1.09222	-0.985933	9.11	5.192	-1.09222	-0.985933	0.0776	0.0812	0	0	0	0	0	0	0	0	0	0	0	0	0	0	0	0	0	0	0	0	0	0	0	0	0	0	0	0
1487	3210	histidine kinase	PA14_RS14745;PA14_36260	PA2200;-	PA14_RS14745;PA14_36260	false	false	49	49	0.667025	0.347357	0.57145	0.811143	-0.459225	-0.243022	5.31414	4.503	-0.459225	-0.243022	0.345	0.3032	1	1	1	1	1	1	1	1	1	1	1	1	1	1	1	1	0	1	1	1	0	1	1	1	1	1	1	1
1488	3212	hypothetical protein	PA14_RS18720;PA14_46120	PA1417;-	PA14_RS18720;PA14_46120	false	false	47	47	0.331939	0.679252	0.676914	-0.472706	0.478942	0.169466	5.22189	5.6946	0.478942	0.169466	0.3218	0.328	1	1	1	1	1	1	1	1	1	1	1	0	1	1	1	1	1	1	1	1	0	1	1	1	1	1	1	0
1489	3213	peptide ABC transporter substrate-binding protein	PA14_RS23825;PA14_58420	PA4502;-	PA14_RS23825;PA14_58420	false	false	52	52	1	1	1	0	0	0	5.26735	NaN	0	0	0	0	1	1	1	1	1	1	1	1	1	1	1	1	1	1	1	1	1	1	1	1	1	1	1	1	1	1	1	1
1490	3215	urea ABC transporter permease	PA14_RS26260;PA14_64280	PA4859;-	PA14_RS26260;PA14_64280	false	false	52	52	1	1	1	0	0	0	5.26735	NaN	0	0	0	0	1	1	1	1	1	1	1	1	1	1	1	1	1	1	1	1	1	1	1	1	1	1	1	1	1	1	1	1
1491	3221	sensor protein PilS	PA14_RS24585;PA14_60250	PA4546;-	PA14_RS24585;PA14_60250	false	false	51	51	0.897242	0.115194	0.278294	2.62686	-0.93857	-0.555496	5.31786	2.691	-0.93857	-0.555496	0.131	0.1435	1	1	1	1	1	1	1	0	1	1	1	1	1	1	1	1	1	1	1	1	1	1	1	1	1	1	1	1
1492	3222	hypothetical protein	-	-	NT80_RS27065;-	false	false	1	1	0.919131	0.091328	0.136629	3.58765	-1.0394	-0.864456	8.786	5.19835	-1.0394	-0.864456	0.0987	0.1028	0	0	0	0	0	0	0	0	0	0	0	0	0	0	0	0	0	0	0	0	0	0	0	0	0	0	0	0
1493	3223	aromatic hydrocarbon degradation protein	PA14_RS16935;PA14_41750	PA1764;-	PA14_RS16935;PA14_41750	false	false	52	52	1	1	1	0	0	0	5.26735	NaN	0	0	0	0	1	1	1	1	1	1	1	1	1	1	1	1	1	1	1	1	1	1	1	1	1	1	1	1	1	1	1	1
1494	3225	ATP-dependent endonuclease	-	-	L683_RS64770;L683_04100	false	false	1	1	0.0626977	0.945106	0.203929	-3.07141	1.20275	0.690521	2.255	5.32641	1.20275	0.690521	0.0322	0.0355	0	0	1	0	0	0	0	0	0	0	0	0	0	0	0	0	0	0	0	0	0	0	0	0	0	0	0	0
1495	3226	formate transporter	PA14_RS11430;PA14_28150	PA2777;-	PA14_RS11430;PA14_28150	false	false	101	52	1	1	1	0	0	0	5.26735	NaN	0	0	0	0	2	2	2	2	2	2	2	2	2	2	2	2	2	2	2	2	2	2	2	1	2	2	1	2	2	2	2	2
1496	3227	benzoylformate decarboxylase	PA14_RS26475;PA14_64770	PA4901;-	PA14_RS26475;PA14_64770	false	false	49	49	0.872472	0.135904	0.307005	1.45884	-0.866767	-0.512854	5.35151	3.89267	-0.866767	-0.512854	0.1347	0.1597	1	1	0	1	1	1	1	1	1	1	1	1	1	1	1	1	1	1	1	0	1	1	1	1	1	1	1	0
1497	3233	chemotaxis protein	PA14_RS11380;PA14_28050	PA2788;-	PA14_RS11380;PA14_28050	false	false	50	50	0.245107	0.769607	0.434792	-1.35528	0.610645	0.361719	5.21522	6.5705	0.610645	0.361719	0.2472	0.2227	1	1	1	1	1	1	1	1	1	1	1	1	1	1	1	1	1	1	1	1	1	1	0	1	1	1	1	1
1498	3235	cyclic diguanylate phosphodiesterase	PA14_RS05815;PA14_14530	PA3825;-	PA14_RS05815;PA14_14530	false	false	50	50	0.396772	0.621452	0.862581	-0.30124	0.40146	0.0642003	5.25576	5.557	0.40146	0.0642003	0.3738	0.417	1	1	1	1	1	1	1	1	1	1	1	1	1	1	1	1	1	1	1	1	1	1	1	1	0	1	1	1
1499	3237	glucose-methanol-choline oxidoreductase	-	-	NQ67_RS22180;-	false	false	1	1	0.92866	0.0808686	0.103292	3.918	-1.09222	-0.985933	9.11	5.192	-1.09222	-0.985933	0.0776	0.0812	0	0	0	0	0	0	0	0	0	0	0	0	0	0	0	0	0	0	0	0	0	0	0	0	0	0	0	0
1500	3238	oxidoreductase	PA14_RS01935;PA14_04780	PA0364;-	PA14_RS01935;PA14_04780	false	false	52	52	1	1	1	0	0	0	5.26735	NaN	0	0	0	0	1	1	1	1	1	1	1	1	1	1	1	1	1	1	1	1	1	1	1	1	1	1	1	1	1	1	1	1
1501	3239	FAD-linked oxidase	PA14_RS10110;PA14_24940	PA3026;-	PA14_RS10110;PA14_24940	false	false	52	52	1	1	1	0	0	0	5.26735	NaN	0	0	0	0	1	1	1	1	1	1	1	1	1	1	1	1	1	1	1	1	1	1	1	1	1	1	1	1	1	1	1	1
1502	3240	cytochrome c oxidase subunit I	PA14_RS00540;PA14_01300	PA0106;-	PA14_RS00540;PA14_01300	false	false	52	52	1	1	1	0	0	0	5.26735	NaN	0	0	0	0	1	1	1	1	1	1	1	1	1	1	1	1	1	1	1	1	1	1	1	1	1	1	1	1	1	1	1	1
1503	3241	MFS transporter	-	-	NT80_RS27045;-	false	false	1	1	0.919131	0.091328	0.136629	3.58765	-1.0394	-0.864456	8.786	5.19835	-1.0394	-0.864456	0.0987	0.1028	0	0	0	0	0	0	0	0	0	0	0	0	0	0	0	0	0	0	0	0	0	0	0	0	0	0	0	0
1504	3248	sporadically distributed protein, TIGR04141 family	-	-	-	false	false	2	2	0.189347	0.823268	0.419798	-1.39968	0.722742	0.37696	3.9215	5.32118	0.722742	0.37696	0.1892	0.2196	0	0	0	0	1	0	0	0	0	0	0	0	0	0	0	0	0	0	0	0	0	0	0	0	0	0	0	0
1505	3250	type VI secretion system protein ImpK	PA14_RS13910;PA14_34110	PA2362;-	PA14_RS13910;PA14_34110	true	false	48	48	0.385183	0.627878	0.737839	-0.420229	0.414333	0.132038	5.23502	5.65525	0.414333	0.132038	0.3781	0.3605	1	1	1	1	1	1	1	1	1	1	1	1	1	1	1	1	0	1	1	1	0	1	1	1	1	1	1	0
1506	3251	3-(3-hydroxyphenyl)propionate hydroxylase	-	-	ACP77_RS00105;-	false	false	2	2	0.912474	0.0953412	0.126485	2.62876	-1.02072	-0.897959	7.795	5.16624	-1.02072	-0.897959	0.098	0.0666	0	0	0	0	0	0	0	0	0	0	0	0	0	0	0	0	0	0	0	0	0	0	0	0	0	0	0	0
1507	3255	hypothetical protein	-	-	Q000_RS14980;Q000_01675	false	false	1	1	0.158784	0.85681	0.307161	-2.47596	0.799192	0.512634	2.839	5.31496	0.799192	0.512634	0.1896	0.1988	0	0	0	0	0	0	0	0	0	0	1	0	0	0	0	0	0	0	0	0	0	0	0	0	0	0	0	0
1508	3257	MFS transporter	PA14_RS11905;PA14_29210	PA2701;-	PA14_RS11905;PA14_29210	false	false	51	51	0.102758	0.908672	0.143718	-3.52545	0.988183	0.84249	5.19955	8.725	0.988183	0.84249	0.1152	0.1196	1	1	1	1	1	1	1	1	1	1	1	1	1	1	1	1	1	1	1	1	1	1	1	1	1	1	1	1
1509	3258	ABC-F family ATPase	PA14_RS15885;PA14_39130	PA1964;-	PA14_RS15885;PA14_39130	false	false	52	52	1	1	1	0	0	0	5.26735	NaN	0	0	0	0	1	1	1	1	1	1	1	1	1	1	1	1	1	1	1	1	1	1	1	1	1	1	1	1	1	1	1	1
1510	3259	peptide ABC transporter ATP-binding protein	PA14_RS18670;-	PA1428a;-	PA14_RS18670;-	false	false	44	44	0.180609	0.825983	0.455536	-0.690364	0.743261	0.341477	5.16114	5.8515	0.743261	0.341477	0.1815	0.2305	1	1	1	1	1	1	1	1	0	1	1	1	1	1	1	0	1	1	1	1	1	1	0	1	0	1	1	1
1511	3260	phospholipase	PA14_RS28565;PA14_70110	PA5310;-	PA14_RS28565;PA14_70110	false	false	52	52	1	1	1	0	0	0	5.26735	NaN	0	0	0	0	1	1	1	1	1	1	1	1	1	1	1	1	1	1	1	1	1	1	1	1	1	1	1	1	1	1	1	1
1512	3261	aldehyde dehydrogenase	PA14_RS20740;PA14_51050	PA1027;-	PA14_RS20740;PA14_51050	false	false	52	52	1	1	1	0	0	0	5.26735	NaN	0	0	0	0	1	1	1	1	1	1	1	1	1	1	1	1	1	1	1	1	1	1	1	1	1	1	1	1	1	1	1	1
1513	3262	carboxylate--amine ligase	PA14_RS19050;PA14_46880	PA1345;-	PA14_RS19050;PA14_46880	false	false	51	51	0.553007	0.473438	0.922567	0.236902	-0.324737	-0.035002	5.2719	5.035	-0.324737	-0.035002	0.463	0.4761	1	1	1	1	1	1	1	1	1	1	1	1	1	1	1	1	1	1	1	1	1	1	1	1	0	1	1	1
1514	3263	ATP-dependent RNA helicase RhlB	PA14_RS05620;PA14_14040	PA3861;-	PA14_RS05620;PA14_14040	false	false	52	52	1	1	1	0	0	0	5.26735	NaN	0	0	0	0	1	1	1	1	1	1	1	1	1	1	1	1	1	1	1	1	1	1	1	1	1	1	1	1	1	1	1	1
1515	3266	DNA topoisomerase	-	-	NS42_RS25765;-	false	false	2	2	0.912474	0.0953412	0.2283	2.08172	-1.02072	-0.641494	7.269	5.18728	-1.02072	-0.641494	0.1023	0.1332	0	0	0	0	0	0	0	0	0	0	0	0	0	0	0	0	0	0	0	0	0	0	0	0	0	0	0	0
1516	3267	alginate biosynthesis protein AlgA	PA14_RS07380;PA14_18380	PA3551;-	PA14_RS07380;PA14_18380	false	false	51	51	0.115194	0.897242	0.170482	-3.30929	0.93857	0.768321	5.20371	8.513	0.93857	0.768321	0.1357	0.1393	1	1	1	1	1	1	1	1	1	1	1	1	1	1	1	1	1	1	1	1	1	1	1	1	1	1	1	1
1517	3268	hypothetical protein	-	-	P997_RS31380;P997_05001	false	false	1	1	0.135794	0.878202	0.285721	-2.5871	0.867119	0.544058	2.73	5.3171	0.867119	0.544058	0.1637	0.1691	0	0	0	0	0	0	0	0	0	1	0	0	0	0	0	0	0	0	0	0	0	0	0	0	0	0	0	0
1518	3269	aminoglycoside response regulator	-	PA2818;-	PA2818;-	false	false	12	12	0.998732	0.00136221	0.00502212	2.14314	-2.86575	-2.29911	6.91592	4.77278	-2.86575	-2.29911	0.0008	0.003	0	0	0	0	0	0	0	0	1	0	0	0	0	0	0	0	0	0	0	0	0	0	0	0	0	0	0	0
1519	3273	flagellar hook-length control protein FliK	PA14_RS18440;PA14_45400	PA1474;-	PA14_RS18440;PA14_45400	false	false	51	51	0.115194	0.897242	0.170482	-3.30929	0.93857	0.768321	5.20371	8.513	0.93857	0.768321	0.1357	0.1393	1	1	1	1	1	1	1	1	1	1	1	1	1	1	1	1	1	1	1	1	1	1	1	1	1	1	1	1
1520	3274	membrane protein	PA14_RS22905;PA14_56130	PA4320;-	PA14_RS22905;PA14_56130	false	false	52	52	1	1	1	0	0	0	5.26735	NaN	0	0	0	0	1	1	1	1	1	1	1	1	1	1	1	1	1	1	1	1	1	1	1	1	1	1	1	1	1	1	1	1
1521	3275	portal protein	-	-	Q009_RS28810;Q009_04307	false	true	9	6	0.87105	0.135073	0.274938	1.13701	-0.869432	-0.560765	6.27317	5.13615	-0.869432	-0.560765	0.1311	0.1377	0	0	0	0	0	0	0	0	0	0	0	0	0	0	0	0	0	1	0	0	0	4	0	0	0	0	0	0
1522	3278	conjugal transfer protein	-	-	P998_RS35245;P998_05834	false	true	3	3	0.915222	0.0910383	0.255696	1.62118	-1.04078	-0.592276	6.795	5.17382	-1.04078	-0.592276	0.0917	0.1371	0	0	0	0	0	0	0	0	0	0	0	0	0	0	0	0	0	0	0	0	0	0	0	0	0	0	0	0
1523	3280	portal protein	-	-	ACP77_RS02995;-	false	false	14	14	0.820704	0.184748	0.438207	0.583256	-0.733421	-0.35832	5.69357	5.11032	-0.733421	-0.35832	0.1821	0.218	0	0	0	0	0	0	0	1	0	0	0	1	1	0	0	0	0	0	0	1	1	0	0	0	0	0	0	1
1524	3287	peptide chain release factor 3	PA14_RS05395;PA14_13410	PA3903;-	PA14_RS05395;PA14_13410	false	false	52	52	1	1	1	0	0	0	5.26735	NaN	0	0	0	0	1	1	1	1	1	1	1	1	1	1	1	1	1	1	1	1	1	1	1	1	1	1	1	1	1	1	1	1
1525	3288	sulfurtransferase	PA14_RS12410;PA14_30430	PA2603;-	PA14_RS12410;PA14_30430	false	false	51	51	0.091328	0.919131	0.136629	-3.58765	1.0394	0.864456	5.19835	8.786	1.0394	0.864456	0.0987	0.1019	1	1	1	1	1	1	1	1	1	1	1	1	1	1	1	1	1	1	1	1	1	1	1	1	1	1	1	1
1526	3289	glutamate--cysteine ligase	PA14_RS28020;PA14_68730	PA5203;-	PA14_RS28020;PA14_68730	true	false	50	50	0.926654	0.0801994	0.20959	2.16668	-1.09583	-0.678629	5.35068	3.184	-1.09583	-0.678629	0.0842	0.1068	1	1	0	1	1	1	1	1	1	1	1	1	1	1	1	1	1	1	1	0	1	1	1	1	1	1	1	1
1527	3290	DNA methyltransferase	-	-	ACP77_RS14450;-	false	false	4	3	0.977335	0.0248617	0.0201111	3.24769	-1.60447	-1.69656	8.32767	5.07998	-1.60447	-1.69656	0.0206	0.0133	0	0	0	0	0	0	0	0	0	0	0	0	0	0	0	0	0	0	0	0	0	0	0	0	0	0	0	0
1528	3291	hypothetical protein	-	-	NR50_RS27310;-	false	false	2	2	0.603228	0.415223	0.922103	0.1702	-0.381718	-0.0352207	5.431	5.2608	-0.381718	-0.0352207	0.393	0.4431	0	0	0	0	0	0	0	0	0	0	0	0	0	0	0	0	0	0	0	0	0	0	0	0	0	1	0	0
1529	3292	4-hydroxyacetophenone monooxygenase	PA14_RS18115;PA14_44560	PA1538;-	PA14_RS18115;PA14_44560	false	false	52	52	1	1	1	0	0	0	5.26735	NaN	0	0	0	0	1	1	1	1	1	1	1	1	1	1	1	1	1	1	1	1	1	1	1	1	1	1	1	1	1	1	1	1
1530	3295	ATP-binding protein	PA14_RS22840;PA14_55980	PA4308;-	PA14_RS22840;PA14_55980	false	false	50	50	0.0953412	0.912474	0.2283	-2.08172	1.02072	0.641494	5.18728	7.269	1.02072	0.641494	0.1023	0.1328	1	1	1	1	1	1	1	1	1	1	1	1	1	1	1	1	1	1	1	1	1	1	1	1	1	1	1	1
1531	3299	FAD-dependent oxidoreductase	PA14_RS10115;PA14_24950	PA3025;-	PA14_RS10115;PA14_24950	false	false	52	52	1	1	1	0	0	0	5.26735	NaN	0	0	0	0	1	1	1	1	1	1	1	1	1	1	1	1	1	1	1	1	1	1	1	1	1	1	1	1	1	1	1	1
1532	3300	peptide ABC transporter substrate-binding protein	PA14_RS28600;PA14_70200	PA5317;-	PA14_RS28600;PA14_70200	false	false	52	52	1	1	1	0	0	0	5.26735	NaN	0	0	0	0	1	1	1	1	1	1	1	1	1	1	1	1	1	1	1	1	1	1	1	1	1	1	1	1	1	1	1	1
1533	3301	DNA polymerase V	-	-	NT88_RS29605;-	false	false	5	5	0.711826	0.298858	0.600532	0.593745	-0.524535	-0.221464	5.804	5.21026	-0.524535	-0.221464	0.2928	0.2934	0	0	0	0	0	0	0	1	0	0	0	0	0	0	0	0	1	0	0	0	0	0	0	0	0	0	0	0
1534	3302	pilus assembly protein	PA14_RS24200;PA14_59290	-	PA14_RS24200;PA14_59290	false	false	30	30	0.577101	0.430163	0.926674	-0.0623515	-0.366367	0.0330731	5.24097	5.30332	-0.366367	0.0330731	0.4337	0.4537	0	1	1	1	0	0	0	0	1	1	1	1	0	0	0	1	0	1	1	1	1	0	0	0	1	0	1	1
1535	3305	hypothetical protein	-	-	NS72_RS02795;-	false	false	1	1	0.897242	0.115194	0.170482	3.30929	-0.93857	-0.768321	8.513	5.20371	-0.93857	-0.768321	0.1357	0.137	0	0	0	0	0	0	0	0	0	0	0	0	0	0	0	0	0	0	0	0	0	0	0	0	0	0	0	0
1536	3309	quinohemoprotein amine dehydrogenase subunit alpha	-	-	L683_RS44940;L683_09075	false	false	1	1	0.0626977	0.945106	0.203929	-3.07141	1.20275	0.690521	2.255	5.32641	1.20275	0.690521	0.0322	0.0355	0	0	1	0	0	0	0	0	0	0	0	0	0	0	0	0	0	0	0	0	0	0	0	0	0	0	0	0
1537	3312	GMP synthetase	PA14_RS06105;PA14_15340	PA3769;-	PA14_RS06105;PA14_15340	false	false	52	52	1	1	1	0	0	0	5.26735	NaN	0	0	0	0	1	1	1	1	1	1	1	1	1	1	1	1	1	1	1	1	1	1	1	1	1	1	1	1	1	1	1	1
1538	3314	serine recombinase	PA14_RS09015;PA14_22270	-	PA14_RS09015;PA14_22270	false	false	7	7	0.324274	0.685307	0.626781	-0.476324	0.489088	0.202884	4.85514	5.33147	0.489088	0.202884	0.3187	0.319	0	0	0	1	0	0	0	0	0	0	0	1	0	0	0	0	0	1	0	0	0	1	0	0	0	0	0	0
1539	3315	histidine kinase	PA14_RS10910;PA14_26970	PA2870;-	PA14_RS10910;PA14_26970	false	false	52	52	1	1	1	0	0	0	5.26735	NaN	0	0	0	0	1	1	1	1	1	1	1	1	1	1	1	1	1	1	1	1	1	1	1	1	1	1	1	1	1	1	1	1
1540	3316	glucan biosynthesis protein G	PA14_RS27375;PA14_67090	PA5078;-	PA14_RS27375;PA14_67090	false	false	52	52	1	1	1	0	0	0	5.26735	NaN	0	0	0	0	1	1	1	1	1	1	1	1	1	1	1	1	1	1	1	1	1	1	1	1	1	1	1	1	1	1	1	1
1541	3317	hypothetical protein	-	-	Q006_RS22200;Q006_03235	false	false	10	10	0.983665	0.0173047	0.0300084	1.80001	-1.76184	-1.52276	6.7212	4.92119	-1.76184	-1.52276	0.0147	0.0159	0	0	0	0	0	0	0	0	0	1	0	0	0	0	0	0	0	0	0	0	0	0	0	0	0	0	1	0
1542	3318	hypothetical protein	-	-	NT80_RS25630;-	false	false	3	3	0.347357	0.667025	0.831946	-0.304585	0.459225	0.0799051	4.98033	5.28492	0.459225	0.0799051	0.3414	0.4366	0	0	1	0	0	0	0	0	0	0	0	0	0	0	0	0	0	0	1	0	0	0	0	0	0	0	0	0
1543	3326	ATPase	-	-	PABE173_RS29775;PABE173_5501	false	false	1	1	0.193189	0.824547	0.384173	-2.11298	0.714017	0.415473	3.195	5.30798	0.714017	0.415473	0.2293	0.2301	0	0	0	0	0	0	0	0	0	0	0	0	1	0	0	0	0	0	0	0	0	0	0	0	0	0	0	0
1544	3328	transposase	-	-	PACIG1_RS31525;PACIG1_5992	false	false	2	2	0.189347	0.823268	0.377467	-1.5302	0.722742	0.423121	3.796	5.3262	0.722742	0.423121	0.1876	0.1904	0	0	0	0	0	0	0	0	0	0	0	0	1	0	0	0	0	0	0	0	1	0	0	0	0	0	0	0
1545	3331	MFS transporter	-	-	Q009_RS08035;Q009_00026	false	false	3	1	0.394918	0.630492	0.755716	-0.757922	0.403493	0.121641	4.524	5.28192	0.403493	0.121641	0.4021	0.4067	0	0	0	0	0	0	0	0	0	0	0	0	0	0	0	0	0	0	0	0	0	3	0	0	0	0	0	0
1546	3336	sulfate transporter	PA14_RS00525;PA14_01250	PA0103;-	PA14_RS00525;PA14_01250	false	false	52	52	1	1	1	0	0	0	5.26735	NaN	0	0	0	0	1	1	1	1	1	1	1	1	1	1	1	1	1	1	1	1	1	1	1	1	1	1	1	1	1	1	1	1
1547	3337	ABC transporter ATP-binding protein	PA14_RS00690;PA14_01670	PA0136;-	PA14_RS00690;PA14_01670	false	false	47	47	0.107189	0.89843	0.296258	-1.17946	0.969851	0.528329	5.15394	6.3334	0.969851	0.528329	0.1051	0.1514	1	1	1	1	1	1	1	1	1	1	1	1	1	1	1	1	1	1	1	1	0	1	1	1	1	1	1	0
1548	3338	malate:quinone oxidoreductase	PA14_RS07785;PA14_19470	PA3452;-	PA14_RS07785;PA14_19470	false	false	51	51	0.841216	0.175453	0.370223	2.17518	-0.75584	-0.431536	5.30918	3.134	-0.75584	-0.431536	0.21	0.2256	1	1	1	1	1	1	1	1	1	1	1	0	1	1	1	1	1	1	1	1	1	1	1	1	1	1	1	1
1549	3341	ATPase AAA	PA14_RS21570;PA14_52980	PA0873;-	PA14_RS21570;PA14_52980	false	false	52	52	1	1	1	0	0	0	5.26735	NaN	0	0	0	0	1	1	1	1	1	1	1	1	1	1	1	1	1	1	1	1	1	1	1	1	1	1	1	1	1	1	1	1
1550	3345	nitric oxide reductase transcription regulator	PA14_RS12090;PA14_29620	PA2665;-	PA14_RS12090;PA14_29620	false	false	52	52	1	1	1	0	0	0	5.26735	NaN	0	0	0	0	1	1	1	1	1	1	1	1	1	1	1	1	1	1	1	1	1	1	1	1	1	1	1	1	1	1	1	1
1551	3346	FHA domain-containing protein	-	-	Q009_RS35825;Q009_05757	false	false	3	3	0.734981	0.278031	0.522831	0.915469	-0.555907	-0.281639	6.13	5.21453	-0.555907	-0.281639	0.2785	0.2602	0	0	0	0	0	0	0	0	0	0	0	0	0	0	0	0	0	0	0	0	0	1	0	0	0	1	0	0
1552	3347	membrane protein	-	-	NT54_RS20320;-	false	false	2	2	0.0669499	0.939006	0.159818	-2.42252	1.17425	0.796374	2.938	5.36052	1.17425	0.796374	0.0704	0.0765	0	0	0	0	0	1	0	0	0	0	0	0	0	0	1	0	0	0	0	0	0	0	0	0	0	0	0	0
1553	3349	EmrB/QacA family drug resistance transporter	PA14_RS09525;PA14_23520	PA3137;-	PA14_RS09525;PA14_23520	false	false	52	52	1	1	1	0	0	0	5.26735	NaN	0	0	0	0	1	1	1	1	1	1	1	1	1	1	1	1	1	1	1	1	1	1	1	1	1	1	1	1	1	1	1	1
1554	3351	thymidine phosphorylase	-	-	ACP77_RS11810;-	false	false	7	7	0.44668	0.5639	0.911881	-0.108527	0.350003	0.0400617	5.17343	5.28196	0.350003	0.0400617	0.4333	0.46	0	0	0	0	0	0	0	0	0	0	0	0	1	0	0	0	0	1	1	0	1	0	0	0	0	0	0	1
1555	3354	type I-E CRISPR-associated protein Cse1/CasA	-	-	Q006_RS09250;Q006_00592	false	false	13	13	0.232975	0.773438	0.611395	-0.392256	0.63269	0.213678	4.97315	5.36541	0.63269	0.213678	0.2443	0.3172	1	0	1	0	1	0	0	0	0	1	0	0	0	1	0	0	0	0	1	0	0	0	0	1	0	1	0	0
1556	3355	DNA-directed RNA polymerase sigma-70 factor	-	-	NS72_RS01390;-	false	false	1	1	0.897242	0.115194	0.170482	3.30929	-0.93857	-0.768321	8.513	5.20371	-0.93857	-0.768321	0.1357	0.137	0	0	0	0	0	0	0	0	0	0	0	0	0	0	0	0	0	0	0	0	0	0	0	0	0	0	0	0
1557	3358	transposase	PA14_RS24295;PA14_59580	-	PA14_RS24295;PA14_59580	false	false	5	4	0.219859	0.79017	0.393601	-1.06773	0.657856	0.404943	4.28175	5.34948	0.657856	0.404943	0.2158	0.2015	0	0	0	1	0	0	0	0	0	0	0	1	0	0	0	0	0	0	0	0	0	0	0	0	0	0	0	0
1558	3363	alkyl hydroperoxide reductase subunit F	PA14_RS00710;PA14_01720	PA0140;-	PA14_RS00710;PA14_01720	false	false	49	49	0.0420968	0.961311	0.124675	-2.17833	1.37575	0.904222	5.14167	7.32	1.37575	0.904222	0.0415	0.0716	1	1	1	1	1	1	1	1	1	1	1	1	1	1	1	1	1	1	1	1	1	1	1	1	1	1	1	1
1559	3364	aerotaxis receptor Aer	PA14_RS17995;PA14_44300	PA1561;-	PA14_RS17995;PA14_44300	false	false	50	50	0.037179	0.966523	0.0468962	-3.39108	1.4297	1.32886	5.13692	8.528	1.4297	1.32886	0.0337	0.0337	1	1	1	1	1	1	1	1	1	1	1	1	1	1	1	1	1	1	1	1	1	1	1	1	1	1	1	1
1560	3371	transposase	-	-	NR39_RS09020;-	false	false	1	1	0.841216	0.175453	0.56205	1.41078	-0.75584	-0.250225	6.651	5.24022	-0.75584	-0.250225	0.2068	0.2079	0	0	0	0	0	0	0	0	0	0	0	0	0	0	0	0	0	0	0	0	0	0	0	0	0	0	0	0
1561	3376	4-hydroxyphenylacetate 3-monooxygenase, oxygenase component	PA14_RS04435;PA14_11000	PA4091;-	PA4091;-	false	false	52	52	1	1	1	0	0	0	5.26735	NaN	0	0	0	0	1	1	1	1	1	1	1	1	1	1	1	1	1	1	1	1	1	1	1	1	1	1	1	1	1	1	1	1
1562	3377	extracelullar DNA degradation protein EddA	PA14_RS05360;PA14_13330	PA3910;-	PA14_RS05360;PA14_13330	false	false	51	51	0.553007	0.473438	0.922567	0.236902	-0.324737	-0.035002	5.2719	5.035	-0.324737	-0.035002	0.463	0.4761	1	1	1	1	1	1	1	1	1	1	1	1	1	1	1	1	1	1	1	1	1	1	1	1	0	1	1	1
1563	3378	poly(beta-D-mannuronate) O-acetylase	PA14_RS07395;PA14_18450	PA3548;-	PA14_RS07395;PA14_18450	false	false	51	51	0.07134	0.937302	0.0796457	-4.20655	1.14667	1.09884	5.18645	9.393	1.14667	1.09884	0.0581	0.0631	1	1	1	1	1	1	1	1	1	1	1	1	1	1	1	1	1	1	1	1	1	1	1	1	1	1	1	1
1564	3379	hypothetical protein	PA14_RS25430;PA14_62230	PA4701;-	PA14_RS25430;PA14_62230	false	false	51	51	0.091328	0.919131	0.136629	-3.58765	1.0394	0.864456	5.19835	8.786	1.0394	0.864456	0.0987	0.1019	1	1	1	1	1	1	1	1	1	1	1	1	1	1	1	1	1	1	1	1	1	1	1	1	1	1	1	1
1565	3380	carbohydrate kinase	PA14_RS10120;PA14_24960	PA3024;-	PA14_RS10120;PA14_24960	false	false	52	52	1	1	1	0	0	0	5.26735	NaN	0	0	0	0	1	1	1	1	1	1	1	1	1	1	1	1	1	1	1	1	1	1	1	1	1	1	1	1	1	1	1	1
1566	3381	integrase	-	-	PA103_RS06145;PA103_1198	false	false	3	3	0.681166	0.332975	0.828115	0.311633	-0.477589	-0.0819092	5.561	5.24937	-0.477589	-0.0819092	0.3168	0.3942	0	0	0	0	0	0	0	0	0	0	0	0	0	0	0	0	0	0	0	0	0	0	0	0	0	0	0	1
1567	3383	hypothetical protein	-	-	NS42_RS25890;-	false	false	2	2	0.912474	0.0953412	0.2283	2.08172	-1.02072	-0.641494	7.269	5.18728	-1.02072	-0.641494	0.1023	0.1332	0	0	0	0	0	0	0	0	0	0	0	0	0	0	0	0	0	0	0	0	0	0	0	0	0	0	0	0
1568	3385	transposase	-	-	NQ81_RS05875;-	false	false	1	1	0.320458	0.703	0.566684	-1.39416	0.494228	0.246659	3.9	5.29416	0.494228	0.246659	0.3477	0.3494	0	0	0	0	0	0	0	0	0	0	0	0	0	0	0	0	0	0	1	0	0	0	0	0	0	0	0	0
1569	3393	hypothetical protein	-	-	NS72_RS23055;-	false	false	2	2	0.452653	0.566136	0.894631	0.23052	0.344234	-0.048356	5.489	5.25848	0.344234	-0.048356	0.432	0.4432	0	0	0	0	1	0	0	0	0	0	0	0	0	0	0	0	0	0	0	0	0	0	0	0	0	0	0	0
1570	3395	type I restriction-modification system subunit M	-	-	NR40_RS07850;-	false	false	3	3	0.970207	0.0325482	0.132567	2.13482	-1.48747	-0.877564	7.279	5.14418	-1.48747	-0.877564	0.0268	0.0765	0	0	0	0	0	0	0	0	0	0	0	0	0	0	0	0	0	0	0	0	0	0	0	0	0	0	0	0
1571	3396	MFS transporter	-	-	NT88_RS12935;-	false	false	1	1	0.884806	0.128664	0.205412	3.06153	-0.890542	-0.687374	8.27	5.20847	-0.890542	-0.687374	0.1536	0.1544	0	0	0	0	0	0	0	0	0	0	0	0	0	0	0	0	0	0	0	0	0	0	0	0	0	0	0	0
1572	3405	type VI secretion-associated protein	PA14_RS17490;PA14_43050	PA1656;-	PA14_RS17490;PA14_43050	false	false	52	52	1	1	1	0	0	0	5.26735	NaN	0	0	0	0	1	1	1	1	1	1	1	1	1	1	1	1	1	1	1	1	1	1	1	1	1	1	1	1	1	1	1	1
1573	3406	hypothetical protein	-	-	NR50_RS02810;-	false	false	1	1	0.655343	0.369508	0.829501	0.524745	-0.432376	-0.0811833	5.782	5.25725	-0.432376	-0.0811833	0.3748	0.3808	0	0	0	0	0	0	0	0	0	0	0	0	0	0	0	0	0	0	0	0	0	0	0	0	0	0	0	0
1574	3407	DNA (cytosine-5-)-methyltransferase	-	-	NS00_RS21210;-	false	false	3	3	0.291347	0.721969	0.483131	-1.00429	0.535589	0.315935	4.321	5.32529	0.535589	0.315935	0.2797	0.2476	0	0	0	0	0	0	0	0	0	0	0	0	0	0	0	1	0	0	0	1	0	0	0	0	0	0	0	0
1575	3408	hypothetical protein	-	-	Q012_RS30800;Q012_04796	false	false	1	1	0.605082	0.420782	0.909186	0.278	-0.375943	-0.0413471	5.54	5.262	-0.375943	-0.0413471	0.4281	0.438	0	0	0	0	0	0	0	0	0	0	0	0	0	0	0	0	0	0	0	0	0	0	0	0	0	0	0	0
1576	3409	hypothetical protein	-	-	NS42_RS22215;-	false	false	2	2	0.912474	0.0953412	0.2283	2.08172	-1.02072	-0.641494	7.269	5.18728	-1.02072	-0.641494	0.1023	0.1332	0	0	0	0	0	0	0	0	0	0	0	0	0	0	0	0	0	0	0	0	0	0	0	0	0	0	0	0
1577	3414	hypothetical protein	PA14_RS16110;PA14_39770	PA1915;-	PA14_RS16110;PA14_39770	false	false	51	51	0.92866	0.0808686	0.237777	2.85729	-1.09222	-0.62383	5.32229	2.465	-1.09222	-0.62383	0.0784	0.0932	1	1	1	1	0	1	1	1	1	1	1	1	1	1	1	1	1	1	1	1	1	1	1	1	1	1	1	1
1578	3417	beta-aspartyl-peptidase	PA14_RS28910;PA14_70980	PA5375;-	PA14_RS28910;PA14_70980	false	false	52	52	1	1	1	0	0	0	5.26735	NaN	0	0	0	0	1	1	1	1	1	1	1	1	1	1	1	1	1	1	1	1	1	1	1	1	1	1	1	1	1	1	1	1
1579	3418	SpoVR family protein	PA14_RS03060;PA14_07650	PA0586;-	PA14_RS03060;PA14_07650	false	false	52	52	1	1	1	0	0	0	5.26735	NaN	0	0	0	0	1	1	1	1	1	1	1	1	1	1	1	1	1	1	1	1	1	1	1	1	1	1	1	1	1	1	1	1
1580	3419	CoA ligase	PA14_RS20910;PA14_51430	PA0996;-	PA14_RS20910;PA14_51430	false	false	52	52	1	1	1	0	0	0	5.26735	NaN	0	0	0	0	1	1	1	1	1	1	1	1	1	1	1	1	1	1	1	1	1	1	1	1	1	1	1	1	1	1	1	1
1581	3421	catalase	-	-	Q009_RS38660;Q009_06345	false	false	3	3	0.638038	0.376771	0.683364	0.585075	-0.423923	-0.165348	5.81867	5.23359	-0.423923	-0.165348	0.3716	0.3375	0	0	0	0	0	0	0	0	0	0	0	0	0	0	0	0	0	1	0	0	0	1	0	0	0	0	0	0
1582	3426	hypothetical protein	-	-	Q009_RS31220;Q009_04805	false	false	4	4	0.391763	0.621365	0.848924	-0.23925	0.406977	0.0711312	5.0465	5.28575	0.406977	0.0711312	0.3838	0.434	0	0	0	0	0	0	0	0	1	0	0	0	0	0	0	0	0	1	0	0	0	1	0	0	0	0	0	0
1583	3429	conjugal transfer protein TraG	-	-	ACP77_RS11910;-	false	false	26	23	0.947531	0.0544735	0.129214	1.01077	-1.26381	-0.88869	5.83104	4.82028	-1.26381	-0.88869	0.0514	0.0627	0	1	1	0	0	0	0	1	0	0	0	0	1	0	0	0	0	2	1	0	1	0	0	1	0	1	0	1
1584	3430	MFS transporter	-	-	NQ67_RS22150;-	false	false	1	1	0.92866	0.0808686	0.103292	3.918	-1.09222	-0.985933	9.11	5.192	-1.09222	-0.985933	0.0776	0.0812	0	0	0	0	0	0	0	0	0	0	0	0	0	0	0	0	0	0	0	0	0	0	0	0	0	0	0	0
1585	3431	conjugal transfer protein TraG	PA14_RS24500;PA14_60020	-	PA14_RS24500;PA14_60020	false	false	36	34	0.37548	0.631794	0.523205	-0.448268	0.425413	0.281328	5.11218	5.56044	0.425413	0.281328	0.3646	0.2542	1	1	1	1	0	0	0	0	1	1	1	1	0	0	0	1	0	2	1	1	1	1	0	1	1	0	1	1
1586	3433	hypothetical protein	-	-	PACIG1_RS28940;PACIG1_5500	false	false	4	4	0.181403	0.827511	0.329912	-1.21804	0.741357	0.481601	4.143	5.36104	0.741357	0.481601	0.1807	0.1708	0	0	0	0	0	0	0	0	0	0	0	0	1	0	0	0	0	0	1	0	1	0	0	0	0	1	0	0
1587	3434	transcriptional regulator	-	-	NT47_RS10480;-	false	false	3	3	0.318834	0.695047	0.551087	-0.854299	0.496435	0.25878	4.46233	5.31663	0.496435	0.25878	0.3184	0.2948	0	0	0	0	0	0	0	0	0	0	0	0	1	0	0	0	0	0	0	1	0	0	0	0	0	0	0	0
1588	3437	hypothetical protein	PA14_RS14255;PA14_35020	PA2286;-	PA14_RS14255;PA14_35020	false	false	47	47	0.10157	0.903832	0.191141	-1.47155	0.993236	0.718646	5.12585	6.5974	0.993236	0.718646	0.097	0.0975	1	1	1	1	1	1	1	1	1	1	1	1	1	1	1	1	0	1	1	1	0	1	1	1	1	1	1	1
1589	3439	biofilm formation protein PslB	-	PA2232;-	PA2232;-	false	false	50	50	0.490509	0.528451	0.722646	-0.6174	0.309353	0.141075	5.2436	5.861	0.309353	0.141075	0.4688	0.3476	1	1	1	0	1	1	1	1	1	1	1	1	1	1	1	1	1	1	1	1	1	1	1	1	1	1	1	1
1590	3443	hypothetical protein	PA14_RS19120;PA14_47040	PA1331;-	PA14_RS19120;PA14_47040	false	false	51	51	0.115194	0.897242	0.170482	-3.30929	0.93857	0.768321	5.20371	8.513	0.93857	0.768321	0.1357	0.1393	1	1	1	1	1	1	1	1	1	1	1	1	1	1	1	1	1	1	1	1	1	1	1	1	1	1	1	1
1591	3444	2,3-bisphosphoglycerate-independent phosphoglycerate mutase	PA14_RS27635;PA14_67770	PA5131;-	PA5131;-	false	false	51	51	0.897242	0.115194	0.278294	2.62686	-0.93857	-0.555496	5.31786	2.691	-0.93857	-0.555496	0.131	0.1435	1	1	1	1	1	1	1	0	1	1	1	1	1	1	1	1	1	1	1	1	1	1	1	1	1	1	1	1
1592	3445	PLP-dependent threonine dehydratase	PA14_RS01760;PA14_04320	PA0331;-	PA14_RS01760;PA14_04320	false	false	98	50	0.603228	0.415223	0.793324	0.45588	-0.381718	-0.100549	5.28488	4.829	-0.381718	-0.100549	0.4064	0.4388	2	2	2	2	2	2	2	2	2	2	2	2	1	2	2	2	2	2	2	2	0	2	2	2	1	2	0	2
1593	3447	multidrug resistance protein B	-	-	NR77_RS31025;-	false	false	1	1	0.72564	0.297	0.726497	0.852039	-0.527244	-0.138766	6.103	5.25096	-0.527244	-0.138766	0.3225	0.3241	0	0	0	0	0	0	0	0	0	0	0	0	0	0	0	0	0	0	0	0	0	0	0	0	0	0	0	0
1594	3448	SAM-dependent methyltransferase	-	-	NS00_RS06900;-	false	false	1	1	0.252606	0.768203	0.451335	-1.83055	0.597556	0.345501	3.472	5.30255	0.597556	0.345501	0.2811	0.2835	0	0	0	0	0	0	0	0	0	0	0	0	0	0	0	1	0	0	0	0	0	0	0	0	0	0	0	0
1595	3450	integrase	-	-	NT47_RS31180;-	false	false	1	1	0.703	0.320458	0.734059	0.827569	-0.494228	-0.134269	6.079	5.25143	-0.494228	-0.134269	0.34	0.349	0	0	0	0	0	0	0	0	0	0	0	0	0	0	0	0	0	0	0	0	0	0	0	0	0	0	0	0
1596	3452	AMP-dependent synthetase	-	-	NQ67_RS22165;-	false	false	2	2	0.471549	0.547347	0.804037	0.43176	0.326473	-0.0947238	5.6825	5.25074	0.326473	-0.0947238	0.4517	0.3954	0	0	1	0	0	0	0	0	0	0	0	0	0	0	0	0	0	0	0	0	0	0	0	0	0	0	0	0
1597	3453	aromatic-ring hydroxylase	-	-	Q006_RS14260;Q006_01613	false	false	37	37	0.587914	0.419965	0.786497	0.200054	-0.376787	-0.104303	5.32505	5.125	-0.376787	-0.104303	0.4081	0.394	1	1	1	0	0	1	1	1	1	1	0	1	1	0	1	1	0	1	1	1	0	1	0	1	0	1	1	0
1598	3455	phage portal protein	-	-	PABE177_RS33350;-	false	false	3	3	0.361962	0.652643	0.577863	-0.797701	0.441337	0.238175	4.51567	5.31337	0.441337	0.238175	0.357	0.3057	0	0	0	0	0	0	0	0	0	0	0	0	1	0	0	0	0	0	0	1	0	0	0	0	0	0	0	0
1599	3456	chromosomal replication initiator protein DnaA	PA14_RS00005;PA14_00010	PA0001;-	PA14_RS00005;PA14_00010	false	false	53	52	1	1	1	0	0	0	5.26735	NaN	0	0	0	0	1	1	1	1	1	1	1	1	1	1	1	1	1	1	1	1	1	1	1	1	1	1	1	1	1	1	1	1
1600	3457	ATP synthase subunit alpha	PA14_RS29825;PA14_73260	PA5556;-	PA14_RS29825;PA14_73260	false	false	52	52	1	1	1	0	0	0	5.26735	NaN	0	0	0	0	1	1	1	1	1	1	1	1	1	1	1	1	1	1	1	1	1	1	1	1	1	1	1	1	1	1	1	1
1601	3458	hypothetical protein	-	-	NS00_RS21200;-	false	false	3	3	0.291347	0.721969	0.483131	-1.00429	0.535589	0.315935	4.321	5.32529	0.535589	0.315935	0.2797	0.2476	0	0	0	0	0	0	0	0	0	0	0	0	0	0	0	1	0	0	0	1	0	0	0	0	0	0	0	0
1602	3460	EmrB/QacA family drug resistance transporter	PA14_RS19600;PA14_48300	PA1236;-	PA14_RS19600;PA14_48300	false	false	52	52	1	1	1	0	0	0	5.26735	NaN	0	0	0	0	1	1	1	1	1	1	1	1	1	1	1	1	1	1	1	1	1	1	1	1	1	1	1	1	1	1	1	1
1603	3462	cell division protein Fic	-	-	PA103_RS03225;PA103_0628	false	false	1	1	0.553007	0.473438	0.985764	0.0434902	-0.324737	-0.00622704	5.31	5.26651	-0.324737	-0.00622704	0.4568	0.4626	0	0	0	0	0	0	0	0	0	0	0	0	0	0	0	0	0	0	0	0	0	0	0	0	0	0	0	1
1604	3467	tricarboxylate transporter	PA14_RS14710;PA14_36170	PA2207;-	PA14_RS14710;PA14_36170	false	false	51	50	0.603228	0.415223	0.670539	0.7398	-0.381718	-0.173576	5.2958	4.556	-0.381718	-0.173576	0.4038	0.3797	1	1	1	1	1	1	1	1	1	1	1	1	2	1	1	1	0	1	1	1	1	1	1	1	1	1	1	1
1605	3472	histidine/phenylalanine ammonia-lyase	PA14_RS27445;PA14_67260	PA5093;-	PA14_RS27445;PA14_67260	false	false	52	52	1	1	1	0	0	0	5.26735	NaN	0	0	0	0	1	1	1	1	1	1	1	1	1	1	1	1	1	1	1	1	1	1	1	1	1	1	1	1	1	1	1	1
1606	3477	uracil permease	PA14_RS10560;PA14_26050	PA2938;-	PA14_RS10560;PA14_26050	false	false	52	52	1	1	1	0	0	0	5.26735	NaN	0	0	0	0	1	1	1	1	1	1	1	1	1	1	1	1	1	1	1	1	1	1	1	1	1	1	1	1	1	1	1	1
1607	3478	transposase	-	-	NS72_RS33035;-	false	false	9	6	0.988609	0.0122748	0.0316187	2.20019	-1.91099	-1.50006	7.21367	5.01348	-1.91099	-1.50006	0.0092	0.0177	0	0	0	0	0	0	0	0	0	0	0	0	0	0	0	0	0	2	0	0	0	0	0	0	0	0	0	0
1608	3479	respiratory nitrate reductase subunit beta	PA14_RS05550;PA14_13800	PA3874;-	PA14_RS05550;PA14_13800	false	false	51	51	0.655343	0.369508	0.715611	0.887412	-0.432376	-0.145323	5.28441	4.397	-0.432376	-0.145323	0.3769	0.3919	1	1	1	1	1	1	1	1	1	1	1	1	1	1	1	1	1	1	1	1	0	1	1	1	1	1	1	1
1609	3480	starch synthase	PA14_RS14885;PA14_36570	PA2165;-	PA14_RS14885;PA14_36570	false	false	48	48	0.219859	0.79017	0.577355	-0.698917	0.657856	0.238557	5.21358	5.9125	0.657856	0.238557	0.2155	0.2798	1	1	1	1	1	1	1	1	1	1	1	1	1	1	1	1	0	1	1	1	1	1	1	1	1	1	1	1
1610	3481	MFS transporter	PA14_RS19195;PA14_47230	PA1316;-	PA14_RS19195;PA14_47230	false	false	51	51	0.091328	0.919131	0.136629	-3.58765	1.0394	0.864456	5.19835	8.786	1.0394	0.864456	0.0987	0.1019	1	1	1	1	1	1	1	1	1	1	1	1	1	1	1	1	1	1	1	1	1	1	1	1	1	1	1	1
1611	3482	catalase	PA14_RS24930;PA14_61040	PA4613;-	PA14_RS24930;PA14_61040	false	false	51	51	0.908672	0.102758	0.274161	2.64929	-0.988183	-0.561994	5.31829	2.669	-0.988183	-0.561994	0.1126	0.1274	1	1	1	1	1	1	0	1	1	1	1	1	1	1	1	1	1	1	1	1	1	1	1	1	1	1	1	1
1612	3483	phosphoenolpyruvate carboxykinase (ATP)	PA14_RS27965;PA14_68580	PA5192;-	PA14_RS27965;PA14_68580	false	false	51	51	0.945106	0.0626977	0.203929	3.07141	-1.20275	-0.690521	5.32641	2.255	-1.20275	-0.690521	0.0322	0.0469	1	1	0	1	1	1	1	1	1	1	1	1	1	1	1	1	1	1	1	1	1	1	1	1	1	1	1	1
1613	3484	ADP-heptose--LPS heptosyltransferase	PA14_RS01355;PA14_03310	-	PA14_RS01355;PA14_03310	false	false	8	8	0.890666	0.114157	0.159003	1.29368	-0.942499	-0.798594	6.362	5.06832	-0.942499	-0.798594	0.1164	0.0853	0	0	0	1	0	0	0	0	0	0	0	1	0	0	0	0	0	0	0	0	0	0	0	0	0	0	0	0
1614	3485	deoxyribodipyrimidine photo-lyase	-	-	PABE171_RS24880;PABE171_4778	false	false	1	1	0.526562	0.5	0.997882	-0.00647059	-0.30103	0.000920888	5.261	5.26747	-0.30103	0.000920888	0.4747	0.5185	0	0	0	0	0	0	0	0	0	0	0	0	0	0	0	0	0	0	0	0	0	0	0	0	0	0	1	0
1615	3486	hypothetical protein	-	-	Q009_RS0107525;-	false	false	7	7	0.62617	0.384029	0.857896	0.175575	-0.415636	-0.0665652	5.41929	5.24371	-0.415636	-0.0665652	0.3746	0.4177	0	0	0	0	0	0	0	0	0	0	0	0	0	0	0	0	0	1	0	1	0	1	0	1	0	0	0	1
1616	3487	histidine kinase	PA14_RS26785;PA14_65570	PA4961;-	PA14_RS26785;PA14_65570	false	false	52	52	1	1	1	0	0	0	5.26735	NaN	0	0	0	0	1	1	1	1	1	1	1	1	1	1	1	1	1	1	1	1	1	1	1	1	1	1	1	1	1	1	1	1
1617	3488	3-hydroxyacyl-CoA dehydrogenase	-	-	NT56_RS16970;-	false	false	1	1	0.115194	0.897242	0.278294	-2.62686	0.93857	0.555496	2.691	5.31786	0.93857	0.555496	0.131	0.1396	0	0	0	0	0	0	0	1	0	0	0	0	0	0	0	0	0	0	0	0	0	0	0	0	0	0	0	0
1618	3489	DSBA oxidoreductase	-	-	L683_RS62400;L683_25150	false	false	1	1	0.0626977	0.945106	0.203929	-3.07141	1.20275	0.690521	2.255	5.32641	1.20275	0.690521	0.0322	0.0355	0	0	1	0	0	0	0	0	0	0	0	0	0	0	0	0	0	0	0	0	0	0	0	0	0	0	0	0
1619	3494	choline-sulfatase	PA14_RS00155;PA14_00380	PA0031;-	PA14_RS00155;PA14_00380	false	false	53	52	1	1	1	0	0	0	5.26735	NaN	0	0	0	0	1	1	1	1	1	1	1	1	1	1	1	1	1	1	1	1	1	1	1	1	1	1	1	1	1	1	1	1
1620	3500	RND transporter MFP subunit	PA14_RS18630;PA14_45910	PA1435;-	PA14_RS18630;PA14_45910	false	false	3	3	0.332975	0.681166	0.610755	-0.729782	0.477589	0.214133	4.57967	5.30945	0.477589	0.214133	0.3247	0.3138	0	0	0	1	0	0	0	0	0	0	0	0	0	0	0	0	0	0	0	0	0	0	0	0	1	0	0	0
1621	3504	glycerol-3-phosphate dehydrogenase	PA14_RS07205;PA14_17930	PA3584;-	PA14_RS07205;PA14_17930	false	false	51	51	0.446993	0.579218	0.963079	-0.112824	0.349699	0.0163379	5.26518	5.378	0.349699	0.0163379	0.4479	0.4518	1	1	1	1	1	1	1	1	1	1	1	1	1	1	1	1	1	1	1	1	1	1	1	1	1	1	1	1
1622	3505	lipid II flippase MurJ	PA14_RS24665;PA14_60390	PA4562;-	PA14_RS24665;PA14_60390	false	false	52	52	1	1	1	0	0	0	5.26735	NaN	0	0	0	0	1	1	1	1	1	1	1	1	1	1	1	1	1	1	1	1	1	1	1	1	1	1	1	1	1	1	1	1
1623	3511	4-hydroxyacetophenone monooxygenase	PA14_RS15215;PA14_37380	PA2097;-	PA14_RS15215;PA14_37380	false	false	50	50	0.131735	0.878155	0.258208	-1.95536	0.880298	0.58803	5.19214	7.1475	0.880298	0.58803	0.1322	0.1436	1	1	1	1	1	1	1	1	1	1	1	1	1	1	1	1	1	1	1	1	1	1	1	1	1	1	1	1
1624	3514	DNA methyltransferase	-	-	Q009_RS18430;Q009_02155	false	false	3	3	0.153766	0.855351	0.291041	-1.50731	0.81314	0.536046	3.847	5.35431	0.81314	0.536046	0.1551	0.1521	0	0	0	0	0	0	0	0	0	0	0	0	1	0	0	0	0	1	0	0	0	1	0	0	0	0	0	0
1625	3517	apolipoprotein N-acyltransferase	PA14_RS04970;PA14_12280	PA3984;-	PA14_RS04970;PA14_12280	false	false	52	52	1	1	1	0	0	0	5.26735	NaN	0	0	0	0	1	1	1	1	1	1	1	1	1	1	1	1	1	1	1	1	1	1	1	1	1	1	1	1	1	1	1	1
1626	3518	transcriptional regulator	PA14_RS13435;PA14_32940	PA2449;-	PA14_RS13435;PA14_32940	false	false	51	51	0.115194	0.897242	0.170482	-3.30929	0.93857	0.768321	5.20371	8.513	0.93857	0.768321	0.1357	0.1393	1	1	1	1	1	1	1	1	1	1	1	1	1	1	1	1	1	1	1	1	1	1	1	1	1	1	1	1
1627	3519	ATPase	-	-	Q011_RS32470;Q011_05116	false	false	1	1	0.297	0.72564	0.544685	-1.47369	0.527244	0.263855	3.822	5.29569	0.527244	0.263855	0.3254	0.3299	0	0	0	0	0	0	0	0	0	0	0	0	0	0	0	0	0	1	0	0	0	0	0	0	0	0	0	0
1628	3521	hypothetical protein	-	-	NS72_RS23020;-	false	false	2	2	0.603228	0.415223	0.725787	0.61012	-0.381718	-0.139191	5.854	5.24388	-0.381718	-0.139191	0.393	0.3503	0	0	0	0	0	0	0	0	0	0	0	0	1	0	0	0	0	0	0	0	0	0	0	0	0	0	0	0
1629	3526	3-hydroxyacyl-CoA dehydrogenase	PA14_RS07175;PA14_17860	PA3590;-	PA14_RS07175;PA14_17860	false	false	50	50	0.566136	0.452653	0.820415	0.39504	-0.344234	-0.0859665	5.28254	4.8875	-0.344234	-0.0859665	0.4268	0.4384	1	1	1	1	1	1	1	1	1	1	1	1	1	1	1	1	1	1	1	1	0	1	1	1	1	1	1	1
1630	3527	sugar ABC transporter ATP-binding protein	PA14_RS15970;PA14_39330	PA1947;-	PA14_RS15970;PA14_39330	false	false	51	51	0.07134	0.937302	0.0796457	-4.20655	1.14667	1.09884	5.18645	9.393	1.14667	1.09884	0.0581	0.0631	1	1	1	1	1	1	1	1	1	1	1	1	1	1	1	1	1	1	1	1	1	1	1	1	1	1	1	1
1631	3528	hypothetical protein	-	-	Y880_RS02480;-	false	false	1	1	0.937302	0.07134	0.0796457	4.20655	-1.14667	-1.09884	9.393	5.18645	-1.14667	-1.09884	0.0581	0.0638	0	0	0	0	0	0	0	0	0	0	0	0	0	0	0	0	0	0	0	0	0	0	0	0	0	0	0	0
1632	3529	hypothetical protein	PA14_RS16920;PA14_41710	PA1767;-	PA14_RS16920;PA14_41710	true	false	52	52	1	1	1	0	0	0	5.26735	NaN	0	0	0	0	1	1	1	1	1	1	1	1	1	1	1	1	1	1	1	1	1	1	1	1	1	1	1	1	1	1	1	1
1633	3532	glycosyl transferase	PA14_RS26055;PA14_63710	PA4819;-	PA14_RS26055;PA14_63710	false	false	52	52	1	1	1	0	0	0	5.26735	NaN	0	0	0	0	1	1	1	1	1	1	1	1	1	1	1	1	1	1	1	1	1	1	1	1	1	1	1	1	1	1	1	1
1634	3536	DSBA oxidoreductase	-	-	NQ67_RS22000;-	false	false	1	1	0.92866	0.0808686	0.103292	3.918	-1.09222	-0.985933	9.11	5.192	-1.09222	-0.985933	0.0776	0.0812	0	0	0	0	0	0	0	0	0	0	0	0	0	0	0	0	0	0	0	0	0	0	0	0	0	0	0	0
1635	3537	histidine ammonia-lyase	PA14_RS27470;PA14_67320	PA5098;-	PA14_RS27470;PA14_67320	false	false	52	52	1	1	1	0	0	0	5.26735	NaN	0	0	0	0	1	1	1	1	1	1	1	1	1	1	1	1	1	1	1	1	1	1	1	1	1	1	1	1	1	1	1	1
1636	3538	NADH-quinone oxidoreductase subunit M	PA14_RS12180;PA14_29860	PA2648;-	PA14_RS12180;PA14_29860	false	false	51	51	0.115194	0.897242	0.170482	-3.30929	0.93857	0.768321	5.20371	8.513	0.93857	0.768321	0.1357	0.1393	1	1	1	1	1	1	1	1	1	1	1	1	1	1	1	1	1	1	1	1	1	1	1	1	1	1	1	1
1637	3539	3-hydroxyacyl-CoA dehydrogenase	PA14_RS17655;PA14_43460	PA1628;-	PA14_RS17655;PA14_43460	false	false	52	52	1	1	1	0	0	0	5.26735	NaN	0	0	0	0	1	1	1	1	1	1	1	1	1	1	1	1	1	1	1	1	1	1	1	1	1	1	1	1	1	1	1	1
1638	3540	multidrug resistance protein B	PA14_RS27795;PA14_68140	PA5160;-	PA14_RS27795;PA14_68140	false	false	52	52	1	1	1	0	0	0	5.26735	NaN	0	0	0	0	1	1	1	1	1	1	1	1	1	1	1	1	1	1	1	1	1	1	1	1	1	1	1	1	1	1	1	1
1639	3541	RND transporter	-	-	NT05_RS21475;-	false	false	1	1	0.446993	0.579218	0.850544	-0.459176	0.349699	0.0703031	4.817	5.27618	0.349699	0.0703031	0.4394	0.4547	0	0	0	0	0	0	0	0	0	0	0	0	0	0	0	0	0	0	0	0	0	0	0	1	0	0	0	0
1640	3543	diguanylate cyclase response regulator	-	-	NS72_RS02380;-	false	false	1	1	0.897242	0.115194	0.170482	3.30929	-0.93857	-0.768321	8.513	5.20371	-0.93857	-0.768321	0.1357	0.137	0	0	0	0	0	0	0	0	0	0	0	0	0	0	0	0	0	0	0	0	0	0	0	0	0	0	0	0
1641	3545	membrane protein	PA14_RS21945;PA14_53880	PA0801;-	PA14_RS21945;PA14_53880	false	false	52	52	1	1	1	0	0	0	5.26735	NaN	0	0	0	0	1	1	1	1	1	1	1	1	1	1	1	1	1	1	1	1	1	1	1	1	1	1	1	1	1	1	1	1
1642	3547	conjugal transfer protein TraG	-	-	ACP77_RS15040;-	false	false	5	5	0.892811	0.113029	0.238745	1.32838	-0.946811	-0.622066	6.468	5.13962	-0.946811	-0.622066	0.1106	0.1234	0	0	0	0	0	0	0	0	0	0	0	0	0	0	0	0	0	0	0	0	0	0	0	0	0	1	0	0
1643	3548	RHS repeat-associated core domain-containing protein	-	-	NS72_RS35390;-	false	false	3	3	0.265019	0.747676	0.68789	-0.576259	0.576723	0.162481	4.72433	5.30059	0.576723	0.162481	0.2623	0.358	0	0	0	0	1	0	0	0	0	0	0	0	1	0	0	0	0	0	0	0	0	0	0	0	0	0	0	0
1644	3552	purine phosphorylase	-	-	PACI27_RS15065;PACI27_2906	false	false	3	3	0.708653	0.304953	0.560237	0.834816	-0.515767	-0.251628	6.054	5.21918	-0.515767	-0.251628	0.2939	0.2657	0	0	0	0	0	0	0	0	0	0	0	1	0	0	0	0	0	0	0	0	0	0	0	0	0	0	0	0
1645	3554	carboxylate--amine ligase	PA14_RS15985;PA14_39390	PA1944;-	PA14_RS15985;PA14_39390	false	false	51	51	0.655343	0.369508	0.715611	0.887412	-0.432376	-0.145323	5.28441	4.397	-0.432376	-0.145323	0.3769	0.3919	1	1	1	1	1	1	1	1	1	1	1	1	1	1	1	1	1	1	1	1	0	1	1	1	1	1	1	1
1646	3557	sulfurtransferase DndC	-	-	NS33_RS29180;-	false	false	1	1	0.0808686	0.92866	0.237777	-2.85729	1.09222	0.62383	2.465	5.32229	1.09222	0.62383	0.0784	0.0811	0	0	0	0	1	0	0	0	0	0	0	0	0	0	0	0	0	0	0	0	0	0	0	0	0	0	0	0
1647	3560	pellicle/biofilm biosynthesis glycosyltransferase PelF	PA14_RS09940;PA14_24550	PA3059;-	PA14_RS09940;PA14_24550	false	false	52	52	1	1	1	0	0	0	5.26735	NaN	0	0	0	0	1	1	1	1	1	1	1	1	1	1	1	1	1	1	1	1	1	1	1	1	1	1	1	1	1	1	1	1
1648	3561	fumarase	PA14_RS22970;PA14_56300	PA4333;-	PA14_RS22970;PA14_56300	false	false	52	52	1	1	1	0	0	0	5.26735	NaN	0	0	0	0	1	1	1	1	1	1	1	1	1	1	1	1	1	1	1	1	1	1	1	1	1	1	1	1	1	1	1	1
1649	3562	malate:quinone oxidoreductase	PA14_RS25085;PA14_61400	PA4640;-	PA14_RS25085;PA14_61400	false	false	52	52	1	1	1	0	0	0	5.26735	NaN	0	0	0	0	1	1	1	1	1	1	1	1	1	1	1	1	1	1	1	1	1	1	1	1	1	1	1	1	1	1	1	1
1650	3563	hypothetical protein	-	-	NQ73_RS17275;-	false	false	1	1	0.5	0.526562	0.937531	-0.19102	0.30103	0.0280144	5.08	5.27102	0.30103	0.0280144	0.4854	0.4917	0	0	0	0	0	0	0	0	0	0	0	0	0	0	0	0	0	0	0	0	0	0	0	0	0	1	0	0
1651	3564	type I restriction-modification protein subunit M	-	-	Q011_RS32490;Q011_05121	false	false	1	1	0.297	0.72564	0.544685	-1.47369	0.527244	0.263855	3.822	5.29569	0.527244	0.263855	0.3254	0.3299	0	0	0	0	0	0	0	0	0	0	0	0	0	0	0	0	0	1	0	0	0	0	0	0	0	0	0	0
1652	3565	transposase	-	-	NT80_RS31150;-	false	false	2	2	0.919801	0.0875262	0.189465	2.26424	-1.05786	-0.72247	7.4445	5.18026	-1.05786	-0.72247	0.0922	0.1066	0	0	0	0	0	0	0	0	0	0	0	0	0	0	0	0	0	0	0	0	0	0	0	0	0	0	0	0
1653	3566	hypothetical protein	-	-	NS72_RS02510;-	false	false	1	1	0.897242	0.115194	0.170482	3.30929	-0.93857	-0.768321	8.513	5.20371	-0.93857	-0.768321	0.1357	0.137	0	0	0	0	0	0	0	0	0	0	0	0	0	0	0	0	0	0	0	0	0	0	0	0	0	0	0	0
1654	3575	aldehyde dehydrogenase	PA14_RS04780;PA14_11810	PA1984;-	PA14_RS04780;PA14_11810	false	false	50	31	0.529733	0.477691	0.980919	0.0163164	-0.320853	-0.00836701	5.27394	5.25762	-0.320853	-0.00836701	0.4712	0.4885	0	2	1	2	1	0	0	0	1	2	2	0	1	0	0	2	0	2	1	0	1	2	0	0	2	1	1	2
1655	3576	sodium:proline symporter	PA14_RS22045;PA14_54150	PA0783;-	PA14_RS22045;PA14_54150	false	false	52	52	1	1	1	0	0	0	5.26735	NaN	0	0	0	0	1	1	1	1	1	1	1	1	1	1	1	1	1	1	1	1	1	1	1	1	1	1	1	1	1	1	1	1
1656	3577	exopolyphosphatase	PA14_RS28210;PA14_69220	PA5241;-	PA14_RS28210;PA14_69220	false	false	52	52	1	1	1	0	0	0	5.26735	NaN	0	0	0	0	1	1	1	1	1	1	1	1	1	1	1	1	1	1	1	1	1	1	1	1	1	1	1	1	1	1	1	1
1657	3578	arabinose ABC transporter permease	-	-	Q009_RS0107310;-	false	false	8	8	0.310453	0.698444	0.533825	-0.576102	0.508004	0.272601	4.77987	5.35598	0.508004	0.272601	0.3118	0.2787	0	0	0	0	0	0	0	0	1	1	0	0	0	0	0	0	0	1	0	1	0	1	0	0	0	0	0	0
1658	3579	sigma-54-dependent Fis family transcriptional regulator	PA14_RS17455;PA14_42970	PA1663;-	PA14_RS17455;PA14_42970	false	false	50	50	0.490509	0.528451	0.836958	0.35812	0.309353	-0.0772962	5.28112	4.923	0.309353	-0.0772962	0.4721	0.4543	1	1	1	1	1	1	1	1	1	1	1	1	0	1	1	1	1	1	1	1	1	1	1	1	1	1	1	1
1659	3580	DNA methyltransferase	-	-	NT47_RS23080;-	false	false	1	1	0.703	0.320458	0.734059	0.827569	-0.494228	-0.134269	6.079	5.25143	-0.494228	-0.134269	0.34	0.349	0	0	0	0	0	0	0	0	0	0	0	0	0	0	0	0	0	0	0	0	0	0	0	0	0	0	0	0
1660	3581	hypothetical protein	-	-	NT80_RS29775;-	false	false	3	3	0.347357	0.667025	0.831946	-0.304585	0.459225	0.0799051	4.98033	5.28492	0.459225	0.0799051	0.3414	0.4366	0	0	1	0	0	0	0	0	0	0	0	0	0	0	0	0	0	0	1	0	0	0	0	0	0	0	0	0
1661	3587	transposase	-	-	NR39_RS09010;-	false	false	1	1	0.841216	0.175453	0.56205	1.41078	-0.75584	-0.250225	6.651	5.24022	-0.75584	-0.250225	0.2068	0.2079	0	0	0	0	0	0	0	0	0	0	0	0	0	0	0	0	0	0	0	0	0	0	0	0	0	0	0	0
1662	3588	glycerol kinase	PA14_RS07215;PA14_17960	PA3582;-	PA14_RS07215;PA14_17960	false	false	50	50	0.260311	0.754893	0.726236	-0.60908	0.584507	0.138922	5.24392	5.853	0.584507	0.138922	0.2584	0.3515	1	1	1	1	1	1	1	1	1	1	1	1	1	1	1	1	1	1	1	1	1	1	1	1	1	1	1	1
1663	3589	tripartite tricarboxylate transporter TctA	PA14_RS22205;PA14_54570	PA0752;-	PA14_RS22205;PA14_54570	false	false	51	51	0.824547	0.193189	0.384173	2.11298	-0.714017	-0.415473	5.30798	3.195	-0.714017	-0.415473	0.2293	0.2438	1	1	1	1	1	1	1	1	1	1	1	1	0	1	1	1	1	1	1	1	1	1	1	1	1	1	1	1
1664	3590	RND transporter	-	-	ACP77_RS11655;-	false	false	9	9	0.264708	0.74315	0.575237	-0.495023	0.577233	0.240154	4.858	5.35302	0.577233	0.240154	0.2555	0.2864	0	0	0	0	0	0	0	1	0	0	0	0	1	0	0	0	0	1	1	0	1	0	0	1	0	0	0	1
1665	3592	serine hydroxymethyltransferase	PA14_RS13460;PA14_33010	PA2444;-	PA14_RS13460;PA14_33010	false	false	41	34	0.542126	0.465512	0.911989	0.0777647	-0.332069	-0.0400102	5.29426	5.2165	-0.332069	-0.0400102	0.4646	0.4626	1	1	0	2	0	1	1	1	1	1	2	0	0	0	1	1	1	1	0	0	0	2	1	1	0	0	0	1
1666	3594	CoA-transferase	PA14_RS29270;PA14_71890	PA5445;-	PA14_RS29270;PA14_71890	false	false	52	52	1	1	1	0	0	0	5.26735	NaN	0	0	0	0	1	1	1	1	1	1	1	1	1	1	1	1	1	1	1	1	1	1	1	1	1	1	1	1	1	1	1	1
1667	3596	RND transporter	PA14_RS13055;PA14_31920	PA2525;-	PA14_RS13055;PA14_31920	false	false	52	52	1	1	1	0	0	0	5.26735	NaN	0	0	0	0	1	1	1	1	1	1	1	1	1	1	1	1	1	1	1	1	1	1	1	1	1	1	1	1	1	1	1	1
1668	3597	hypothetical protein	PA14_RS03800;-	PA4219;-	PA14_RS03800;-	false	false	53	52	1	1	1	0	0	0	5.26735	NaN	0	0	0	0	1	1	1	1	1	1	1	1	1	1	1	1	1	1	1	1	1	1	1	1	1	1	1	1	1	1	1	2
1669	3599	N5,N10-methylene tetrahydromethanopterin reductase	PA14_RS14070;PA14_34540	PA2326;-	PA2326;-	false	false	45	45	0.789393	0.21843	0.34054	0.930457	-0.660688	-0.467832	5.3926	4.46214	-0.660688	-0.467832	0.2217	0.1782	1	1	1	1	1	0	1	1	1	1	1	1	1	0	1	1	0	1	1	1	0	1	1	1	1	1	1	1
1670	3601	halogenase	-	-	Q009_RS26520;Q009_03816	false	false	13	13	0.512644	0.495785	0.936707	-0.0613846	-0.304707	0.0283962	5.22131	5.28269	-0.304707	0.0283962	0.4984	0.4709	0	0	0	0	0	0	0	0	1	0	1	0	0	1	0	0	0	1	0	1	0	1	0	0	0	0	1	0
1671	3602	ATPase AAA	-	-	ACP77_RS14470;-	false	false	4	3	0.977335	0.0248617	0.0201111	3.24769	-1.60447	-1.69656	8.32767	5.07998	-1.60447	-1.69656	0.0206	0.0133	0	0	0	0	0	0	0	0	0	0	0	0	0	0	0	0	0	0	0	0	0	0	0	0	0	0	0	0
1672	3606	hypothetical protein	-	-	NS42_RS32260;-	false	false	2	2	0.912474	0.0953412	0.2283	2.08172	-1.02072	-0.641494	7.269	5.18728	-1.02072	-0.641494	0.1023	0.1332	0	0	0	0	0	0	0	0	0	0	0	0	0	0	0	0	0	0	0	0	0	0	0	0	0	0	0	0
1673	3607	aspartyl/glutamyl-tRNA(Asn/Gln) amidotransferase subunit B	PA14_RS23735;PA14_58190	PA4484;-	PA14_RS23735;PA14_58190	false	false	51	51	0.679542	0.344657	0.628769	1.17698	-0.462613	-0.201509	5.28998	4.113	-0.462613	-0.201509	0.3642	0.3804	1	1	1	1	1	1	1	1	1	1	1	1	1	1	1	1	1	1	1	0	1	1	1	1	1	1	1	1
1674	3609	hypothetical protein	-	-	NS42_RS26095;-	false	false	2	2	0.912474	0.0953412	0.2283	2.08172	-1.02072	-0.641494	7.269	5.18728	-1.02072	-0.641494	0.1023	0.1332	0	0	0	0	0	0	0	0	0	0	0	0	0	0	0	0	0	0	0	0	0	0	0	0	0	0	0	0
1675	3619	hypothetical protein	-	-	NS42_RS31175;-	false	false	2	2	0.912474	0.0953412	0.2283	2.08172	-1.02072	-0.641494	7.269	5.18728	-1.02072	-0.641494	0.1023	0.1332	0	0	0	0	0	0	0	0	0	0	0	0	0	0	0	0	0	0	0	0	0	0	0	0	0	0	0	0
1676	3622	nitrate reductase	PA14_RS18710;PA14_46100	PA1419;-	PA14_RS18710;PA14_46100	false	false	52	52	1	1	1	0	0	0	5.26735	NaN	0	0	0	0	1	1	1	1	1	1	1	1	1	1	1	1	1	1	1	1	1	1	1	1	1	1	1	1	1	1	1	1
1677	3623	HDOD domain-containing protein	PA14_RS26755;PA14_65470	PA4955;-	PA14_RS26755;PA14_65470	false	false	51	51	0.252606	0.768203	0.684151	-0.990706	0.597556	0.164848	5.24829	6.239	0.597556	0.164848	0.2907	0.2944	1	1	1	1	1	1	1	1	1	1	1	1	1	1	1	1	1	1	1	1	1	1	1	1	1	1	1	1
1678	3625	Fha domain-containing protein	-	PA0081;-	PA0081;-	false	false	21	21	0.10745	0.895958	0.210983	-0.846639	0.968794	0.675752	4.76262	5.60926	0.968794	0.675752	0.1052	0.1038	0	1	0	0	1	0	1	0	0	1	1	1	1	1	0	0	0	1	0	1	1	0	0	1	0	0	1	1
1679	3626	hypothetical protein	PA14_RS10615;PA14_26165	PA2928;-	PA14_RS10615;PA14_26165	false	false	50	50	0.857835	0.15314	0.334447	1.67216	-0.814911	-0.475672	5.33166	3.6595	-0.814911	-0.475672	0.1532	0.1701	1	1	1	1	1	1	1	0	1	1	1	1	1	1	1	1	1	1	1	1	1	1	0	1	1	1	1	1
1680	3627	hypothetical protein	-	-	NT42_RS12425;-	false	false	4	4	0.780141	0.230157	0.630328	0.603854	-0.637975	-0.200434	5.82475	5.2209	-0.637975	-0.200434	0.2262	0.3101	1	0	0	0	0	0	0	0	0	0	0	0	0	0	0	0	0	0	0	0	0	0	0	0	0	0	0	0
1681	3631	Pyoverdin chromophore biosynthetic protein pvcC	PA14_RS14405;PA14_35400	PA2256;-	PA14_RS14405;PA14_35400	false	false	49	49	0.546863	0.468718	0.987229	-0.0229796	-0.329089	0.00558199	5.26602	5.289	-0.329089	0.00558199	0.4616	0.4688	1	1	1	1	1	1	1	1	1	1	1	1	0	0	1	1	1	1	1	1	1	1	1	1	1	1	1	1
1682	3634	hypothetical protein	-	-	Y880_RS22150;-	false	false	3	3	0.376771	0.638038	0.950088	-0.0898639	0.423923	0.0222361	5.18267	5.27253	0.423923	0.0222361	0.3727	0.4911	0	0	1	0	0	0	0	0	0	0	0	0	0	0	0	0	0	0	1	0	0	0	0	0	0	0	0	0
1683	3637	MFS transporter	PA14_RS01215;PA14_03040	PA0246;-	PA14_RS01215;PA14_03040	false	false	52	52	1	1	1	0	0	0	5.26735	NaN	0	0	0	0	1	1	1	1	1	1	1	1	1	1	1	1	1	1	1	1	1	1	1	1	1	1	1	1	1	1	1	1
1684	3640	methylmalonate-semialdehyde dehydrogenase (acylating)	PA14_RS22230;PA14_54620	PA0747;-	PA14_RS22230;PA14_54620	false	false	51	51	0.5	0.526562	0.997882	0.00647059	0.30103	-0.000920888	5.26747	5.261	0.30103	-0.000920888	0.4747	0.5209	1	1	1	1	1	1	1	1	1	1	1	1	1	1	1	1	1	1	1	1	1	1	1	1	1	1	0	1
1685	3642	xylulokinase	PA14_RS14005;PA14_34350	PA2343;-	PA14_RS14005;PA14_34350	false	false	47	47	0.175872	0.832039	0.290432	-1.19363	0.754804	0.536955	5.15257	6.3462	0.754804	0.536955	0.1709	0.1436	1	1	1	1	1	1	1	1	1	1	1	1	1	1	1	1	0	1	1	1	0	1	1	1	1	1	1	0
1686	3643	type II secretion system protein GspE	PA14_RS09715;PA14_23990	PA3103;-	PA14_RS09715;PA14_23990	false	false	49	49	0.361962	0.652643	0.686087	-0.579769	0.441337	0.163621	5.2339	5.81367	0.441337	0.163621	0.3547	0.3331	1	1	0	1	1	1	1	1	1	1	1	1	1	1	1	1	1	1	1	1	1	1	1	1	1	1	1	1
1687	3644	bifunctional ADP-dependent (S)-NAD(P)H-hydrate dehydratase/NAD(P)H-hydrate epimerase	PA14_RS26725;PA14_65390	PA4949;-	PA14_RS26725;PA14_65390	false	false	53	52	1	1	1	0	0	0	5.26735	NaN	0	0	0	0	1	1	1	1	1	1	1	1	1	1	1	1	1	1	1	1	1	1	1	1	1	1	1	1	1	1	1	1
1688	3648	hypothetical protein	-	-	PA103_RS20120;-	false	false	1	1	0.553007	0.473438	0.985764	0.0434902	-0.324737	-0.00622704	5.31	5.26651	-0.324737	-0.00622704	0.4568	0.4626	0	0	0	0	0	0	0	0	0	0	0	0	0	0	0	0	0	0	0	0	0	0	0	0	0	0	0	1
1689	3653	lysine--tRNA ligase	PA14_RS06625;PA14_16530	PA3700;-	PA14_RS06625;PA14_16530	false	false	52	52	1	1	1	0	0	0	5.26735	NaN	0	0	0	0	1	1	1	1	1	1	1	1	1	1	1	1	1	1	1	1	1	1	1	1	1	1	1	1	1	1	1	1
1690	3654	amidophosphoribosyltransferase	PA14_RS09690;PA14_23920	PA3108;-	PA14_RS09690;PA14_23920	false	false	50	50	0.584777	0.433864	0.894158	-0.23156	-0.362646	0.0485855	5.25844	5.49	-0.362646	0.0485855	0.4165	0.4403	1	1	0	1	1	1	1	1	1	1	1	1	1	1	1	1	1	1	1	1	1	1	1	1	1	1	1	1
1691	3655	integrating conjugative element protein	PA14_RS24450;PA14_59920	-	PA14_RS24450;PA14_59920	false	false	35	35	0.279197	0.727322	0.366175	-0.642188	0.554089	0.436312	5.0574	5.69959	0.554089	0.436312	0.2687	0.1794	1	1	1	1	0	0	0	0	1	1	1	1	1	0	0	1	0	1	1	1	1	1	0	1	1	0	1	1
[truncated: 10,040 more rows]
[truncated: 24 more columns]
